# Supplementary material for: Direct screening for ribozyme activity in mammalian cells
Source: Royal Society of Chemistry journal article supplement (doi:10.1039/c7cc07815c), 2017-01-01
Supplement: c7cc07815c1.xlsx [file c7cc07815c1.xlsx]

## Sheet: Structural Elements
P1		P2		J1		L1/L2(PK)		P3
ACUC…GAGU	83	GUAA…UUAG	58	AUAAAUA	65	GUCUGGGC…UUAGGCCCAGAGCG	53	UCCCGGCAGCUGCCGGGG	6
GCUC…GAGG	43	GGCU…AGUC	15	AUAAAUAG	48	GUCUGAGC…UUAAGCUCAGAGCG	11	UCUUGGCUGGCAGAUCUGCCGGUCGGGG	5
AGUC…GACU	42	GACA…UGUA	14	AUAAACA	46	GUCUGAGC…UUAGGCUCAGAGCG	9	UCUUGGUCGGUAUUACCGGCUGGGG	5
AGUG…CACU	23	GGUG…CACA	12	GUAAAUA	29	GUCAUAGC…UUAAGCUAUGAGCG	9	GCAGGGUUCUUCCCUGC	4
ACAG…CUGU	22	GUUA…UAAC	12	AUAAACAG	22	GACUAAGC…UUAGGCUUAGAGCG	8	UUUGCACCUGUAAUAAGGUGCAAG	3
AGCC…GGCU	21	GCCA…UGGA	10	AUAAAAA	13	GUCUGGGC…UUAGGCCUAGAGCG	8	UAUCAAUUCCUUCGGGAAUUGGUG	3
CGUC…GACG	11	GGCA…UGCA	10	UUAAAUA	11	GACUAUGC…UUAGGCAUAGUGCG	7	UAUCAAUCCCUUCGGGGAUUGGUG	3
ACAC…GUGU	10	GGCA…UGUU	9	AUAAAC	10	GACUAGGC…UUAAGCCUAGUGCG	6	UCCGAGUUGUUUAAACGACUCGGG	3
ACUC…GAGG	9	CCAG…CUGG	8	AUAAAAAG	7	GUUAGGGC…UUAAGCCCUAAGCG	6	UCCCGGCAUUUUGCCGGGG	3
ACUG…CAGU	9	GGAU…AUCA	7	AUAAAGA	6	GUGGCGGC…UUAAGCCGCCAGCG	6	UCCGGGAAGGAGGGCAUUUGCCGAUGGCCCAAGCUCCCGGG	3
AAUC…GAUU	9	GGCU…AGUA	7	CUAAAUAG	6	GUUUGAGC…UUAGGCUCAAAGCG	5	UCCUGGUUGGCCGGAUCGGUCUGCUGGGG	3
ACCC…GGGU	8	GUAA…UUAC	6	CUAAAUA	6	GUUAGAGC…UUAGGCUCUAAGCG	5	UCUUGGCUGACAGAUCUGUCGGUCGGGG	3
AACC…GGUU	6	UCCA…UGGA	6	GUAAACA	6	GUUGCAGC…UUAAGCUGCAAGCG	5	UCCCGGUAGCUGCCGGGG	3
GCUC…GAGC	4	GACC…GGUA	6	UAAAAUA	5	GACCGAGC…UUAGGCUCGGUGCG	5	UCCCGGCUGCUGCCGGGG	3
GCUC…GAGU	4	GUGA…UCAG	5	UUAAAUAG	5	GUUUGAGC…UUAAGCUCAAAGCG	4	UUGGUGAGAGUAAUCUCACCAG	2
AGUC…GACG	4	ACCA…UGGU	5	CUAAACA	4	GUUUCAGC…UUAAGCUGAAAGCG	4	GUGCGGGAGAUGUGAUCUCUCGCAC	2
ACUU…AAGU	3	GGCU…AGCA	4	AAAAAAA	4	GUUGCGGC…UUAAGCCGCAAGCG	4	UUCAGGCGGUGCAAUAGUGCCGCUUGAG	2
GUUC…GAAC	3	GACA…UGUU	4	CAAAACA	4	GUUGCGCC…UUAGGGCGCAAGCG	4	UGGAGGGUUCGCCCUCCG	2
AGUU…AACU	2	GACU…AGUC	4	CUAAACAG	4	GUUCGGGC…UCAGGCCCGAAGCG	4	UGGAGGGUUCGCCCUCCA	2
ACUG…CAGG	2	AUCU…AGAU	3	UUAAACA	3	GUUCGGGC…UUAGGCCCGAAGCG	4	UGGAGGAUUCGUCCUCCA	2
AGCU…AGCU	2	CCCU…AGGG	3	UAAAAUAG	3	GUCACAGC…UUAAGCUGUGAGCG	4	UUUGCACCUUUAACAGGGUGCAAG	2
CGUG…CACG	2	CGUG…CACA	3	AAAAAAAG	3	GUCAGGGC…UUAGGCCCUGAGCG	4	UAGAGAGAGUGUUUAAACAUUCUCUCUG	2
UGCC…GGCA	2	GCAU…AUGA	3	AAAAAUA	3	GUCUAAGC…UUAAGCUUAGAGCG	4	UUUCCUCGUAAGAGGAAG	2
AGAC…GUCG	2	GCCA…UGGC	3	AUAAAUAGU	3	GUCACAGC…UUAGGCUGUGAGCG	4	CUACAAGCCUAUAUAACAGGCUUGUAA	2
AGUC…GACA	2	GCCG…CGGA	3	UAAAACA	3	GACUAGGC…UCAAGCCUAGUGCG	4	UCCCGACUUUGUCGGGG	2
UCUC…GAGA	2	GCCG…CGGG	3	UAAAAAAG	3	GACUAGAC…UUAGGUCUAGUGCG	3	UCCCGGCUCUGCCGGGG	2
UCUC…GAGU	2	GCUA…UAGC	3	AUGAAUA	3	GUUUGCGC…UUAAGCGCAAAGCG	3	UGGCGGCCCCUGCCGCCG	2
GGUC…GACC	2	GUCA…UGGC	3	UAAAACAG	2	GUUGCAAC…UUAGGUUGCAAGCG	3	GCUCCCUUCGGGGAGC	2
GGUC…GACU	2	GUUC…GAAC	3	CAAAAGAG	2	GUAUCGGC…UUAAGCCGAUAGCG	3	UUCCCUCUUCGGAGGGAG	2
AGCC…GGCG	2	UGUA…UACA	3	UUAAAAA	2	GUCCAGGC…UUAAGCCUGGAGCG	3	UUGGCCGCUCUUAACCGGGUGGCCAG	2
UCUC…GAGG	2	CACA…UGUA	2	GAAAACA	2	GUCUAAGC…UUAGGCUUAGAGCG	3	UCCUGGCGCGAUCGUGCGGUCGGCCGGGG	2
AGUC…GGCU	2	CAGG…CCUG	2	AAAAACA	2	GGCUGGGC…UCAGGCCCAGUGCG	3	UCUUGGCCGGGAGCUGCCGGUCAGGG	2
GCUC…AAGG	1	CGCA…UGUA	2	GUAAAGA	2	GUCUGGGC…UUAGGCCCAGAGAG	3	UCUUGGCUGGCAGAUAUGCCGGUCGGGG	2
AUUC…GAGU	1	CGCG…CGUG	2	UUAAAAAG	2	GACUUUGC…UUAAGCAAAGAGCG	3	UCUUGGCCGGAGCUGCCGGCUGGGG	2
AAUC…GAUA	1	CUUU…AAAG	2	ACAAAAUA	1	GUCAUGGC…UUAAGCCAUGAGCG	2	UCCUGGCAGCUGCCGGGG	2
GAUC…GAUU	1	GACA…UGUC	2	AUAACCAAG	1	GUUUGGGC…UUAGGCCCAAAGCG	2	UGACCAACUUCGGUUGGUCG	2
UGUG…CACA	1	GACC…GGUG	2	AUAAACAAG	1	GUCCUGGC…UUAGGCCAGGAGCG	2	UUCCAAUGUUGUGAAACAUCGGAG	2
GGUG…CACA	1	GACG…CGUA	2	AUAAAGAG	1	GUCACGGC…UUAGGCCGUGAGCG	2	UUCCAGUCUUCGGACUGGAG	2
ACUC…GAGC	1	GACU…AGUU	2	CUAAAAG	1	GUUGUAGC…UUAAGCUGCAAGCG	2	UUCCCACUCUUACAGGGUGGGAG	2
UCUC…GAGC	1	GAUU…AAUC	2	CUAAAGAG	1	GUUGUAGC…UUAAGCUACAAGCG	2	UUGACCGUCACAACGGCGGUCAG	2
GCGC…GAGG	1	GGCA…UGCC	2	AGAAACA	1	GUUACAGC…UUAAGCUGUAAGCG	2	UUGACCGUCAGAAAUGGCGGUCAG	2
AUUC…GAAU	1	GGCA…UGUA	2	UAAAAAUAG	1	GUUUGGGC…AUAAGCCCAAAGCG	2	UUACCCACUCUUUGAGUGGGUAG	2
UGUC…GACA	1	GGCC…GGUA	2	UAUAAACA	1	GACUGAGC…UUAGGCUCAGUGCG	2	UCACGAAUUUUCGUGG	2
CGUC…GACA	1	GGCU…AGCC	2	CUAAAAAG	1	GUUUGGGC…UUAAGCCCAAAGCG	2	GAGGAGAUAAAAAUCUCCUC	1
GCCC…GGCA	1	GGCU…AGUU	2	UAAAAAAA	1	GUCAUGGC…UUUAAGCCAUGAGCG	2	UGCUAUACAUUUUCACAUGUAUAGCG	1
AGUU…AGCU	1	GGCU…GGUC	2	UAAAAAA	1	GUUGCGGC…UUAGGCCGCAAGCG	2	GCAGCAUGCAGUAUCUAGAGCGUGCUGC	1
AGAC…GUCU	1	GGGU…AUCU	2	CUAAAC	1	GUUAGGGC…UUAGGCCCUAAGCG	2	UUGGAGAAUAUUGUGAAAUAUGCUCCAG	1
GCUC…GAGA	1	GGUA…UACA	2	GUAAAAAG	1	GACCGGGC…UCAGGCCCGGUGCG	2	UAGAGAGCUCCGAGUUGGAAGUUGGAGCUCUCUG	1
AGUA…UACU	1	GGUG…CACG	2	CAAAAUAG	1	GUCUGAGC…CUAGGCUCAGAGCG	2	UCUGGUCGCUUUCGAUCGGG	1
CCAG…CUGG	1	GUAA…GUAG	2	GUAAACAG	1	GACAGCGC…UUAAGCGCUGAGCG	2	GCGGUCACAGUUUCAUAACGGAUAAUAUAUACUGUGACCGC	1
GCAC…GUGC	1	GUCC…GGAA	2	CAAAAC	1	GUCUGGGC…UUAAGCCCAGAGCG	2	UGUGACGGGCAUAUGUUUAGCCCGUCACG	1
UAUC…GAGU	1	UGCA…UGCA	2	UAAAAUUAG	1	GACCUAGC…UUAGGCUAGGAGCG	2	UCACCGCCUACAAUGCUAGGCGGUGG	1
CGCC…GGCG	1	GUCA…UGAA	1	UAAAAGAG	1	GACUACGC…UUAAGCGUAGUGCG	2	UUGAUAAAUAUCAG	1
CACC…GGUG	1	GUAA…AUAG	1	GUAAAUAG	1	GACUGGGC…UCAAGCCCAGUGCG	2	GAGAGCAGAUCGUCUGCUCUC	1
UGUC…GACU	1	GUAA…UAGC	1	UUUAAAUA	1	GACCAGGC…CUAAGCCUGGUGCG	1	GUUCAAUUCCAUUCCUAAAAUGGAAUUGAAC	1
ACCC…GGGG	1	GGAA…UUAG	1	UCAAAAAAG	1	GGUUUGGC…UUUAGGCCAAACGCG	1	UUGCUGAUGAGGUUUCAUAACAUCAGCAG	1
AGCC…GACU	1	GCUG…CAGC	1	GUAAAAA	1	GGUCACUC…UUAAGAGUGACGCG	1	UACUGCUUAUGUCCCCUGACAUAGGCGGUG	1
GCUG…CAGU	1	GACA…UGUG	1	GGAAAUA	1	GACUACUC…UUAAGAGUAGUGCG	1	UACUGCUUAUGUUACAUAACAUAGGCGGUG	1
AGAG…CUCU	1	GUCC…GGAG	1	AUAAACU	1	GUUUGGGC…UCAAGCCCAAAGCG	1	UUGGGAGGUCACACUCCCAU	1
GUUC…GAGG	1	CAUA…UAUG	1	CUAAAAA	1	GAUCAGGC…UUUAAGCCUGAUGCG	1	GUACCAGGGAGCAAUCCCUGGUAC	1
ACUC…GAGA	1	AUCC…GGAU	1	AUAAAA	1	GAUACCGC…UUAGGCGGUAUGCG	1	UCUUGUAGUUAAUACUACAGGG	1
AGUG…CACG	1	ACCA…UGGA	1	AAAAAA	1	GUUUGCGC…UUAGGCGCAAAGCG	1	UGGGAGCCAGACGGCUCCCG	1
AGUC…AACU	1	GACA…UGAA	1	AUAAAG	1	GACUAGGC…UUAGGCCUAGUGCG	1	UGGGAGCCAGAUGGCUCCCG	1
GGGC…GCCC	1	CACU…AGCA	1	GCAAACAG	1	GUUGUGGC…UUAAGCCACAAGCG	1	UUCUAACAAAAAGUUAGAG	1
GGGC…GCCU	1	GUGU…ACAU	1	GGAAACAG	1	GACUGGGC…CUAAGCCCAGUGCG	1	CCUCUACACGCCAUUUUGCUGUAGAGG	1
GGAC…GUCC	1	CCUC…GACC	1	AUAAAAUAG	1	GACUGGGC…CUAAGCUCAGUGCG	1	UUCUCAGAGGUAAAACUCUGAGAU	1
		GUAU…AUGC	1	UUAAAUAGC	1	AUCACAUC…UUAAGCUGUGAGCG	1	UUCCACUCUUAGAGUGGAG	1
		AGUU…AACU	1	UUAAACAG	1	UUCUGGAA…UUAGGUCCAGAGCG	1	UCCCGGAGUAACUGGCCGGGG	1
		CCUU…AAGA	1	AAAAAUAG	1	AGCACAGU…UUAAGCUGUGCGCG	1	GUCUGCGGAUUUUGCGGAC	1
		GGCG…CGCA	1	UAAAAC	1	GUUUGGGC…UUUAGCCCAAAGCG	1	GUGUAGGGGCCGGUGUCCCUGCAC	1
		GAAC…GGCG	1	AAAAC	1	GUUCGAGC…AUAAGCUCGAAGCG	1	UCAGAUGCCGGAAGGCAUCUGG	1
		CUCA…UGAG	1			GUGCCAGC…UUAGGCUGGCAGCCG	1	UUUCCCCUUCUGCCCUGCGCAGCCGGGGAAG	1
		CACA…UGAA	1			GACAGGGC…UUAAGCCCUGAGCG	1	GUUCGUAACGUAAUCAUCAUAUGGAUGAGCGUUACGGAC	1
		GAAC…GAAU	1			GACUGGGC…UCAGGCCCAGAGCG	1	UAUAAAGAUUAAUUUCUUUAUC	1
		GCAU…AUGG	1			GUUACAGC…AAUAGGCUGUAAGCG	1	UUAUGCAUAG	1
		GGCU…UGUA	1			GUUCCGGC…UUAAGCCGGAAGCG	1	UUACCCGGAUUGUUUGUCCGGGUAG	1
		AGCU…AGUA	1			GUUUCGGC…UUAAGCCGGAAGCG	1	UUUGCACCUGUAAUAGGGUGCAAG	1
		GCGU…ACGC	1			GGUGCGGC…UUAGGCCGCACGCG	1	UAUCAAUCCCUUCAGGGAUUGGUG	1
		GAAC…GUGG	1			GUUAGAGC…UUAAGCUCUAAGCG	1	UCCGAUGAAGCAACUGCUUCGCCGGG	1
		GUAC…GUAA	1			GAUUGCGC…UUAAGCGUAAAGCG	1	UCCGGCAGAAAUGCCGGG	1
		GCCU…AGAG	1			GUUUCAGC…UUAAGCUGCAAGCG	1	UUUGGCAGUCUGAGUAAGGCUGUCAAG	1
		CGCC…GGCG	1			GAUGCAGC…UUAAGCUGCAAGCG	1	UUUGGCAGUCUGAAAUAAGGUUGCCAAG	1
		GAUU…AAUA	1			GUUGCAGC…UUAAGCUACAAGCG	1	UCAGCUCGUAUCACCCUACGAGCUGG	1
		GCCU…AUGG	1			GACUGGGC…UUAGGCCCGGUGCG	1	UUCCUCUUUGGAGGAG	1
		UUGG…CCAA	1			GUCCCAAC…UUAAGUUGGGAGCG	1	UCCUACCCUUUAGCGGGUAGGG	1
		CUGC…GCAG	1			GUCCGAGC…UUAAGCUCGGAGCG	1	GCCCGCCCUCGUGGCGGGU	1
		GUCC…GGAC	1			GACUCGGC…UUAAGCCGAGAGCG	1	GCGGUCCCUUGGGGCCGC	1
		CACG…CGUA	1			GACUGAGC…UCAAGCUCAGUGCG	1	UUGAGGGUGAAAACCCUCAG	1
		UCCU…UGGA	1			GUCUGGGC…UUAAGCCCCUAGCG	1	GCGGCGCGUACGUGCGCCGC	1
		GGUC…GACA	1			GUUGCGAU…UUAAGUCGCAAGCG	1	UUAGGCCGCUAA	1
		AACU….GUA	1			GACCGGGC…UUUGGCCCGGUGCGG	1	UGUCCUGGAGUUAAUCUUCCAGGGCG	1
		AGCC…GGUU	1			GACCAGGC…UUAGGCCUGGUGCG	1	UUGAAAGGGUUUUUAUUAACCCUUUCAG	1
		AAGA…CUUG	1			GUUCGGGC…UUAAGCCCGAAGCG	1	UUGAAAGGGUUUUGAUUAACCCUUUCAG	1
		GUUG…CAAC	1			GUCCCGGC…UUAGGCCGGGAGCG	1	GCAAGAAUAAUCUUGU	1
		ACGA…CGGA	1			GACCGUGC…UUAGGCACGGUGCG	1	GUAAGAGGUAUCCCCUCUUAC	1
		ACGA…CGGU	1			GACUAGAC…UCAGGUCUAGUGCG	1	GUAAGAGGUAUAACCCUCUUGC	1
		CUGA…UCAG	1			GAUCAGAC…UUAGGUCUGAUGCG	1	UGGGGGCUUUCUGCCCCCG	1
		GAUG…CAUA	1			GACUAUGC…UUAAGCAUAGAGCG	1	GCGGGAUAACUCCCGC	1
		GGCC…GGCG	1			GUCUGCAC…UUAAGUGCAGAGCG	1	GCGGGAUUCGUCCCGC	1
		CGCA…UGUU	1			GGCGUGGC…UUAAGCCACGAGCG	1	UCACCGCUCACCACGAGCGGUGG	1
		AUAA…UUAU	1			GGUUGGGC…AAUAAGCCCAACGCG	1	UUCAGGGUUCACGCCCUGAG	1
		GCCA…UGAA	1			GUCUGAAC…UUAAGUUCAGAGCG	1	UCCGGGAACAAAUCCCGGG	1
		GAAG…CUGG	1			GUCAAGCC…UUAAGACUUGAGCG	1	UUGUCAGAAGACAG	1
		GCCU…GGUA	1			GGUAGAGC…UUAGGCUCUACGCG	1	UUUGCCAGAUGGCAAG	1
		GUUA…UAAU	1			CUCAGGGG…UUAAGCCCUGAGCG	1	GUGCGAAAGUGUUUAAACACACUUUUGUGC	1
		AGUA…UACA	1			GGCUAGGC…UCAAGCCUAGCGCG	1	GUGCGGAUGUGUUUAAACACAUUUGCGC	1
		GUCU…AGCA	1			GAUUCGAC…UUAGGCCGCAAGUG	1	GUGCGAAAGUGUUUAAACACUUUUGUGC	1
		GUGA…UCAC	1			GUUCCGGC…UUAGGCCGGAAGCG	1	UCCCGCAAUUGUUGCGGGG	1
		UGCC…GGCA	1			GACUAAGC…UUAAGCUUAGUGCG	1	UUCGCCUGCCGUUGUGGUGGGCGAG	1
		UUGC…GCAA	1			GACUACGC…UAAAGCGUAGAGCG	1	UUAAGGGGCUAGAGUAAGGAGUGGAUGCCAAGCUCUAGUCCCUUAG	1
		GGUC…GACU	1			GAUUACGC…UUAAGCGUAAAGCG	1	UGGGACGGUAGCAAGCCGCCCCG	1
		GCGA…UCGC	1			GACUAAGC…UUAGGCUUAGUGCG	1	UUCCAGGAGGAAACUCCUGGAG	1
		GGUA…UACC	1			GUUAGGC…UUAAGCCCUAAGCG	1	UUGCAAGUCUAUAACAGGCUUGCAG	1
		AGAC…GUCU	1			GACUAUGU…CUAAGCAUAGUGCG	1	UUCCUGCUUAUGCAGGAG	1
		AACA…UGCA	1			GACUAUGC…CUAAGCAUAGUGCG	1	UCUAUCCCAUUCCAAAUGGGGUAGG	1
		GUUG…CAAA	1			GACUUCGC…UUAGGCGGAGAGCG	1	UCCACUCUGUUUAAACAGGGUGGG	1
		CCGG…CUGG	1			GGCUGCGGC…UUAAGCCCGGCGCG	1	UCCACUCUGUUUAAACGGGGUGGG	1
		GCGG…CCAA	1			GUCAUGGC…UCAGGCCAUGAGCG	1	UCUAUCCCUCACACCACGAGGGAUAGG	1
		GGUG…CAUA	1			GUGGCGAC…UUAAGCCGCCAGCG	1	UUUACGGGGUAUUGCCCCGUAAG	1
		GCCU…UGGU	1			GUCUGAGC…UUUGGCUCAGAGCG	1	UUUACGGGGGGGUAAUACCCCGUAAG	1
		GUCU…AGAA	1			GCCUGGGC…UUAAGCCCAGAGCG	1	UUUACGGGGCAAUACCCCGUAAG	1
		GCCU…AGAA	1			GUUGCGCC…UUAGGGCGCAAGCA	1	UCUGUCCGUCAUGUAAGUGACGGGCAGG	1
		.GCC…GGUA	1			GUUGCGGC…UCAAGCCGCAAGCG	1	UGGGCGGGAAUCCGCCCG	1
		GGCG…CGUU	1			GUUGCAUC…UUAGGAUGCAAGCG	1	UGGGCGAGAUUUCGCCCA	1
		GGGU…ACCA	1			GUUCGUGC…UUAGGCACGAAGCG	1	UGGGGCCCUUCGGGGUCCCG	1
		GGCU…GGCA	1			GUUCGGGC…UCAGGCCCGAGGCG	1	UCUCCUGGAUUCACCAGGGGG	1
		ACAU…UUGU	1			GGUCGGGC…UUAAGCGCGACGCG	1	UUCCCAUCUUUGUGAUGGGAG	1
		CGCA…UGCG	1			GGCUAGGC…UCAGGCCUAGCGCG	1	UCAGCCUGUAGAAAAUUGCAGGCUGG	1
		GUCU…AGUA	1			GUCUGGAC…UUAGGUCCAGAGCG	1	UUCCCCUGCUCACGCGGGGGAG	1
		GUUC…GAAU	1			GUCACGGC…UUAAGCCGUGAGCG	1	UCCCCACCCUGGUGGGGG	1
		GGCA…UGUC	1			GUCAUGGC…UUAGGCCAUGAGCG	1	UCCCGACUUAGUCGGGG	1
		GAAC…GUUA	1			GUCAGAGC…UUAGGCUCUGCGCG	1	UCCCCAGUGUAUUAGCUGGGGG	1
		UCAU…AUGA	1			GUCAGAGC…UUAGGCUCUGAGCG	1	UUAAUAGGGCGUAGUGUGCGCAGGCAUAUUGCACCCUUUUAG	1
		ACGA…UCAG	1			GACUAGAC…UUAAGCCUAGUGCG	1	UUUGUAUAACGGAAGCCGCUAGCAAUAGCAGUGAAAGUUAUAUGAG	1
		GUGC…GCAC	1			GACCGAGC…UCAAGCUCGGAGCG	1	UUUGUAUGACAGAAGCCGCUAGCAAUAGCAGUGAAGGUUAUAUGAG	1
		ACUA…UAGA	1			GACCGAGC…AAUAAGCUCGGAGCG	1	GUAGGUAGACUAUUCUACCUAC	1
		GGCU…AGUG	1			GUCUGAGC…UUAAGCUUAGAGCG	1	UUACAUAGAAUGCAAAUUUUAUGUAG	1
		UACA…UGUA	1			GGCUUGGC…UUAAGCCAAGCGCG	1	UUACAUAAAUUUUAUUUUAUGUAG	1
		CUCU…AGAG	1			GGCAGUGC…UUAGGCGCUGAGCG	1	UUCACUCAACAAAGAGUGAG	1
		GCCG…CGAA	1			GACUAAAC…UUAAGUUUAGUGCG	1	UCCGGGACUUCGGUUCCGGG	1
		CCCG…CGGG	1			CUCAGGGG…UUAGGUCCUGAGCG	1	UUCCUCCGCCACACCACAAGCGGAGGAG	1
		GACC…GGCA	1			GUCAGGGC…UUAGGCCCUGUAGCG	1	UGGCCACCGCAAUGGUGGCCG	1
		GACU…AGUA	1			GUCAGGGC…UUAAGCCCUGUAGCG	1	UUGAUUGUUGGGACAGAUCCUGACAAUCAG	1
		GGUU…AAUA	1			GUCCCAGC…UUAGGCUGGAGCG	1	UGCCCGCCGUCGUGCGGGCG	1
		GGUU…AACA	1			CUCUGAGG…UUAGGCUCAGAGCG	1	UUGCCCGGUAUACCGCCGGGCAG	1
		GCCG….GGC	1			GUCAUAGC…UUAGGCUAUGUAGCG	1	UUCCCGUCUUAAUUGGCGGGGG	1
		AUGC…GCAA	1			GGCACAGC…UUAGGCUGUGAGCG	1	UUCCCCUCACUGGGGAG	1
		GCGG…CCGU	1			GGCUGGGC…UUAGGCCCAGAGCG	1	UUCCCCUCAUUGGGGAG	1
		GCCC…GGGA	1			GUCUGGGC…UUUGGCCCAGAGCG	1	UUCCCCUAUUGGGGAG	1
						GGCGGGGC…UUAGGCCCAGAGCG	1	UUCCCCACAUUGGGGAG	1
						GUCUGGGG…UUAGGCCCAGAGCG	1	UCCCGGAACAAGGCAUUUUCCGAUUCUCCGGGG	1
						GUCCGGGC…UCAGGCCCAGAGCG	1	UUCCCCACUCUAGGGUGGGGAG	1
						GACAGAGU…UUAAGCUCUGAGCG	1	AUUCCUGGAGCGCUGUUUCCAGGGAU	1
						GACUAAGC…UUUAGGCUUAGAGCG	1	UCCUUCCUGCUACGGGAAGGG	1
						GACUAGGC…GUUAAGCCUGGAGCG	1	GCUUUGCCGGCAAACCGGCAAGGC	1
						GACCAAGC…UUAAGCUUGGAGCG	1	UCCCGCCCUCCGUGGGCGGGG	1
						GACCAAGC…UUAGGCUUGGUGCG	1	CCCCGGCCUUGUGCCGGGA	1
						GUUGCAGC…UCAAGCUGCAAGCG	1	UCCCGGCAUUGUGCCGGGG	1
						GUCAGAGC…UUAGGCGCUGAGCG	1	UCCCUGCAUUUUGCCGGGG	1
						GUCGCAGC…UUAAGCUGUGAGCG	1	UCCAUCCCUUCGGGGAUGGG	1
						GUCACAGC…UCAGGCUGUGAGCG	1	UCCCGCCCAUGUGGCGGGG	1
						GAUACGGC…UUAAGCCGUAAGCG	1	CUCCCAGGGUGUAAAGCCCUGGGAA	1
						GACUGGGC…UUAAGCCUAGUGCG	1	UUCCGCCCAUUGUGGGCGGAG	1
						GACUAGAC…UUAAGUCUAGUGCG	1	GGGAGAGUAAUCUCCC	1
						GACUAUGC…UUAAGCAUAGUGCG	1	UGGCGGCACCUGCCGCCG	1
						GUCAGGGC…UCAGGCCCUGAGCG	1	UGGCGGCACCUGCAGCCG	1
						GGCCCGGC…UUAGGCCGGGGGCG	1	GGGCGGCACCUGCCGCCG	1
						GACCCGGC…UCAGGCCGGGAGCG	1	UGGCGGCACUUGCCGCCG	1
						GUUUGAGC…UUUGGCUCAAAGCGG	1	UGGCGGCAAUCUGCCGCCG	1
						GUCGUGGC…UUAAGCCACGAGCG	1	UGGCGGCAACCUGCCACCG	1
						GUUGCAGC…UUAGGCUGCAAGCG	1	UGGCGGCAACCUGCCGCCG	1
						GUUGCACU…UUAAGGUGCAAGCG	1	UUGCCAGAGUGAUCUGGCAG	1
						GUUGCACC…UUAAGGUGCAAGCG	1	UCCAAGCCUAGCCCCUUCUGGGGCUGGGCGAAGG	1
						GUCUGGAC…UUAAGUCCAGAGGCG	1	UUCCGAUCAUUAUUGAUCGGAG	1
						GUCUGGAC…UUAAGUCCAGAGCG	1	GCGCGCGGUCAUCAUGACGCGCGC	1
						GGCAGAGC…UUAAGCUCUGCGCG	1	UCACUAUAUGAGUGG	1
								UCAAUGAUAAGCUCAUUGG	1
								UUCAUAAGAUACUUAUGAG	1
								UCUCCUGUUCUGUGAACGGGAGG	1
								UCUCCCGUAUUAACGGGAGG	1
								GCUCUUCGGAUUGUGUUCCCUCCGCAAUCCGGGGAGC	1
								UCUCCGGGAAGCCCCGGAGG	1
								UCUCCCGCGGACGGGUUUGCCGAUAGCCCGCGCCGCCGGAGG	1
								UCCUCAAGGUGAAAUCCAGAUUUGGUAGUAACCUUGAGGG	1
								UCCUCAAGGUGAAAUCCAGAUUUGGUAGUAACCUUGGGGG	1
								CCUCCCCUUCGGGGGAGG	1
								UUAUAGCCGUAAAUAAGAAGUAAACGGCUAUAG	1
								UCCUGCCGGAAACGGCAGGG	1
								UUCUGCAUAAGCAGAG	1
								UUCCGACACGCUCGGAG	1
								UCCCCGAUAAUAUCGGGGG	1
								UCCCCGAUAUUUCGGGGG	1
								UCUCUGGUCAUAAAGACCAGAGG	1
								UCUCUGGUCUUUAUGACCAGAGG	1
								UCUCUGGUCUUUAUGAUCAGAGG	1
								UUAUAGCCAGUAUAUGGCUAUAG	1
								UCCUUGCCCGGUGUAAAAAACCGGGCAAGGG	1
								GCUCCCCAAGUAAUUAUCUUGGGGGGC	1
								UUGGCCGCUCUUAAUUGAGUGGUCAG	1
								UUACCACUGUGAAAGGUGGUAG	1
								UAGCCCUUCGGGGCUG	1
								UGACCGGUUCGCCGGUCG	1
								UGACCACUGCGGUGGUCG	1
								UCUCCCCGAAAGGGGAGG	1
								UUCCGGGAAAUUGCCGGAG	1
								UUCUCCUUCGGGAGAG	1
								UCCCCCCACCCGCUGUGGGGGG	1
								UCACUUCUCUUCGGAGAAGUGG	1
								UCCCCUUUGAGGAGGGGG	1
								UCCCCUACUAGCUAGGGGG	1
								UCCACACCCCAGCAAUCAGGCUGGGGUAUAUGUAUGGUGGG	1
								GUACAUUUGUGC	1
								UUACAUUUAUGUAG	1
								UCACAUAUUUAUGUGG	1
								UUAUAAUUAUAG	1
								UUACGCCCUGAGUGAUCAGGGCAUAG	1
								UUACGCCCUGAGUAAUCAGGGCAUAG	1
								UCCCCUUGGGUGAGAUCUCACCCUUGGGGG	1
								UUCCGGCUCUUUAUGAUUCGGAG	1
								UUCCGGUUAUAUGAUCGGAG	1
								UCUCGGAGUUAUCCGGGG	1
								UCUCGGAGUGAUCCGGGG	1
								UCCUGGCUCUUUGCCAGGG	1
								UCCUGGCGCGAUCGCACGAUCGGCUGGGG	1
								UCCUGGCACGAUCGGCCGGGG	1
								UCCCGGCUCCUGGUUCGCCGGUCGGGG	1
								UCCUGGCGCGAUCGUGCGGUCGGCCGUGG	1
								UCCUGGCGCGAUCGCACGAUCGACCGGUG	1
								UCCUGGCGCGAUCGCACGAUCGGCCGGGG	1
								UCUUGGCCGGAAGUUACCGACCGGGG	1
								UCUUGGCUGGCCGGAUCGGCCUGCUGGGG	1
								UCUUAGCUGGCCGGAUCGGCCUGCUGGGG	1
								UCUUGGUUGGCAGAUUUGCCAGUCGGGG	1
								UCUUGGCCGGGAGCUACCGGUCAGGG	1
								UCUUGGCCGGGAGCUGCCGGUCAAGG	1
								UCUUGGCCGGGAGCUGCCGGCUGGGG	1
								UCUUGGCUGGCAGAUCUGCCGGCUGGGG	1
								UCUUGGCUGGCAGAUAUGCCGGCUGGGG	1
								UCUUGGCUGGCAAAUCUGCCGGUCGGGG	1
								UCCCGGUCAGCUGCCGGGG	1
								UCCCGGCAGUUGUUGGGG	1
								UCUCGGCAGCUGCCGGGG	1
								UCCCGGCGACUGCCGGGG	1
								UCCCGGCGGCUGCCGGGG	1
								UUCCGGCUGCUGCCGGGG	1
								UCCCGGCAGUUGCCGGGG	1
								UCCCGGCCGCUGCCGGGG	1
								UUCCGGCCCUCGUCGGAG	1
								UUCCGGCCUUCGUCGGAG	1
								UUCCGGCUUUCGUCGGAG	1
								UGACCACUUCG	1
								UCCCUUCCCAAGAGAGAAAACCCUAUAGGCUCGUUGGGAAGGGG	1
								UGACCACUUCGGUGGUCG	1
								CCCCCAAGGCUACGUCCUUUGGGGG	1
								UCCCCACUUCGGUGGGGG	1
								UUCCAGUCUUCACAGACUGGAG	1
								UUCUCACGUUAUCUGAAUGAUGAUGUGAGAG	1
								UUCCCUGUGAAAACGGGGAG	1
								UUGCCCCUUUCGGGGGCAG	1
								UUCGCCCAUAUUGGGCGAG	1
								UUCGCCCUUCGGGGCGGG	1
								UCCACCCCCUCGGGGUGGG	1
								UCCACCCAUUGGGGUGGG	1
								UUGCUCCCCCUGUGGGGGGGGCAG	1
								UUGCCCUUUCGGGGGCAG	1
								UUGCUCCCCCUGUGGGGGCAG	1
								UCCCCCAUGCACUAAACUGCGUAGACGCUGGUGUUUGGGGGG	1
								UCGCCCCCACAGGGGGCGG	1
								UUCCUCCCACUUCGGGAGGAG	1
								UUGAUCCCCCGGUUACAAGGGGAUCAG	1
								UUCCCACUGUCAACGGUGGGAG	1
								UUCCCCGUCAGAUUUGACGGGUAG	1
								UUACCCGUCAAAUUUGACGGGUAG	1
								UUACCCGUCAAAUUUGACGGGCAG	1
								UUCCUGCUCUUUAGGGCAGGAG	1
								UUCCCACUCUUACCGGGUGGGAG	1
								UUCCCACUCUUACUGGGUGGGAG	1
								UUGACCGUUACAAAUGGCGGUCAG	1
								UUGAUCGCCGUACCCGGCGGUCAG	1
								UUCCCAUCUACAUAAGAUGGGAG	1
								UUCCCAUCUACAUAAGGUGGGAG	1
								UUCCCGCCGCAGGGCGGGAG	1
								UUUGACCCCGUUUAAAACGGGGUUGAG	1
								UUCAACCUCGUUUAAACGGGGUUGAG	1
								UUUGACCCCGUUUAAACGGGGUUGAG	1
								UUUGACCCCGUUUAAACGGGGUUAAG	1
								UUACCCACUCAAAGAGUGGGUAG	1
								UUACCCACUCUUUUGAGUGGGUAG	1
								UUACCCACUCAAAAGAGUGGGUAG	1
								UUACCCACUCAAAAAGAGUGGGUAG	1
								UCAUUAUAAAAUGG	1
								UUAUUAUAACAUUGUUGUAAUAG	1
								UUAAAUAAG	1
								UUAUAGACCGUAUAACAGCGGUCUAUAG	1
								UUCACCGGGAUCAUUCGGUGAG	1
								UUCACCGGGAUCAUGCGGUGAG	1
								UUCACCGGGAUCAUCCGGUGAG	1
								UUCACUGGAUUCGUCCAGUGAG	1
								UUCACUGGAUAUGUCCAGUGAG	1
								UCCCUCGCAUCCAGCGAGGGG	1
								UCCGCCCCUCGUGGGCGGG	1
								UCCCGCCCAACCGGGCGGG	1
								GUAACUAUAUAGUUAU	1
								GCUCUCCAACUGGGAGGC	1
								UUAGAAGGUAUAACGGCCUUCUAG	1
								UCCAAGGAGUUAUCCGUUGGG	1
								UUGACCGCCCUCGCGGCGGUCAG	1
								UUGACCGCCAUUGCGGCGGUCAG	1
								GGCGACCGGGCGUAUCGGUGCC	1
								GGCACCGGGCGUAUCGGUGCC	1
								GGCGCCGACCACCGGGCGCC	1

## Sheet: Natural and Synthetic Rz
ID	Raw sequence (core ribozyme)	5'native	3'native	Length (core + lead + tail)	Barcode1	Barcode2	Barcode3	Barcode4
env-1	ATTCGTCATGGCGAATTAAAACAGGGTATTAAGCCATGAGCGGAGGAGATAAAAATCTCCTCATTACC	TAAAT	AATAT	78	TTGCGCATA	CAACAGAAC	ACTGTCTCT	GTTCGATAG
env-2	TGTCGACCAGGCGACATAAAATAGCCTCTAAGCCTGGTGCGTGCTATACATTTTCACATGTATAGCGGCTGGT	ACAAT	TTTAT	83	TCTCGGATT	CCACGTTTC	ACGCGTTAC	CGACCGTTA
env-3	CGTCGGTTTGGCGACGATAAAGAGGTTTTTAGGCCAAACGCGGCAGCATGCAGTATCTAGAGCGTGCTGCGGAACA	CTGCT	ATGAA	86	TGGCTATCT	TAATCGTGG	ACGAGAGTT	TAGTCCTGT
env-4	AGCTGACTAGGCAGCTATAAATAGTACTTAAGCCTAGTGCGTTGGAGAATATTGTGAAATATGCTCCAGGTGTAA	GATAA	AAAGA	85	AATGAGCAG	CTACAGACA	AGAGTTCGA	CGGAAAGCA
env-16	AGTGGGTCACTCCACTCAAAAGAGACCATTAAGAGTGACGCGTTGGTGAGAGTAATCTCACCAGGTTGGT	TGCCA	TGTTA	80	ACTTCAGGG	GGCATGCTT	GCTGCTATA	AGCCTTGCT
env-17	AGTGGACTACTCCACTCAAAAGAGACCATTAAGAGTAGTGCGTTGGTGAGAGTAATCTCACCAGGTTGGT	TGCCA	TGTTA	80	ATTGGGCGT	CCAGTTACG	ACCCAGATC	CAGCAATTC
env-20	CGTCGTTTGGGCGACGTAAAATAGCCGTCAAGCCCAAAGCGTAGAGAGCTCCGAGTTGGAAGTTGGAGCTCTCTGGTCGGG	GGTAA	GATAA	91	CGTCCCTAA	TTGACATGG	ATGCCAACA	TTTGGTGAG
env-21	CGTGGATCAGGCCACGTTAAAAAGCGGTTTAAGCCTGATGCGTCTGGTCGCTTTCGATCGGGGTCCGT	TGGCT	CAGGT	78	AGGCTTATC	CCTAATCTG	TTCAAGGTG	AGCCGAATC
env-22	ACTCGATACCGCGAGTATAAACAGAACTTAGGCGGTATGCGGCGGTCACAGTTTCATAACGGATAATATATACTGTGACCGCGTGTTA	AATAA	CTGGT	98	CCTCTAAGA	CACTTACGT	CCGATTACA	CACTACGCA
env-23	AGCCGTTTGCGCGGCTACAAAATAGACCTTAGGCGCAAAGCGTGTGACGGGCATATGTTTAGCCCGTCACGGTAGGTA	TACAC	AAAAT	88	TTGCGGAGA	ATCTAGACG	TACTCGACA	AGCAACGAC
env-24	TGCCGTTTGAGCGGCATTAAACAGGTCTTAAGCTCAAAGCGTCACCGCCTACAATGCTAGGCGGTGGGTGACA	ATCTT	ACAAT	83	TGCCAGTGT	CCAAACGGT	CGTCCAAAG	ACTGCGTTG
env-25	CGTGGTTAGGGCCACGTTAAATAGTTGCTTAAGCCCTAAGCGTTGATAAATATCAGGTGCAA	GTCAT	TCAGG	72	AACGGATTC	AACCTCTTC	AGGATGTTG	CCACAGAAT
env-27	ACTCGTTTGAGCGAGTATAAACAGTTGGTTAGGCTCAAAGCGGAGAGCAGATCGTCTGCTCTCGTCCAA	AATTA	ATTAA	79	CGTTGCTTA	GACTCTTAG	TGATTCAGG	TGGATATCC
env-28	ACTCGACTAGGCGAGTATAAACAGCGTTTAGGCCTAGTGCGGTTCAATTCCATTCCTAAAATGGAATTGAACATACGC	AAGTA	CGTGC	88	TGTAAGCTG	AGTCATGAG	GGCACTAAT	CTGAGTACA
Sso-1-1	AGTCGTTGTGGCGACTATAACCAAGCTCTTTAAGCCACAAGCGTTGCTGATGAGGTTTCATAACATCAGCAGGTAGAG	ATAAG	AAGAA	88	GACAAACAC	TCGATGTTG	CCCCCTAAA	TAGGGTTCG
env-29	ACACGACTGGGCGTGTATAAACAAGACCACTAAGCCCAGTGCGTACTGCTTATGTCCCCTGACATAGGCGGTGGCTGGT	TAACA	AATAT	89	TGTTCCGAT	AGGTTAGGA	TCTGGGATA	GATTACCGG
env-30	ACACGACTGGGCGTGTATAAAGAGACCACTAAGCTCAGTGCGTACTGCTTATGTTACATAACATAGGCGGTGGCTGGT	ATTAA	AAATA	88	AGCATTCCA	AAGCGTTGC	CGATCTCTC	CAATGCAGC
env-31	ACTCATCACATCGAGTCTAAAAGTCATTTAAGCTGTGAGCGTTGGGAGGTCACACTCCCATGTATGA	CACAT	ACAAA	77	CTCTCAGGT	AGCAAAAGC	TCTCGCGTT	CGTCGAATC
env-32	GCTCTTCTGGAAGAGTCTAAACAGCCTTAGGTCCAGAGCGGTACCAGGGAGCAATCCCTGGTACGTGGTA	AGCTA	GCGGC	80	CGGCTTTAT	TTGGTCGAT	CATCCTGCA	AGTAACGCA
env-33	AGTGGTCTGAGCCACTATAAACCCTTTTAAGCTCAGAGCGTCTTGTAGTTAATACTACAGGGGTAAGA	AATAA	GGTTG	78	TAAGGGTGT	GAGCATAAC	CCCCTTGTA	GAGCCTAAA
env-34	AGACGTTTGGGCGTCGTTAAATAGCAGGTTAGGCCCAAAGCGTGGGAGCCAGACGGCTCCCGGTCCTG	AGCTA	AAAAG	78	CCCAGATAG	GATCTACCG	GGGATGAAT	AGCCAGAAG
env-35	AGACGTTTGGGCGTCGTTAAATAGCAGGTTAGGCCCAAAGCGTGGGAGCCAGATGGCTCCCGGTCCTG	AGCTA	AAAAG	78	CGGTTTACA	ATCCAGCCA	GCTTTCTTC	TACACCGGA
env-37	AGTCAGCACAGTGACTATAAACCGCCTTAAGCTGTGCGCGTTCTAACAAAAAGTTAGAGGTGGCG	CCCCA	TGCAG	75	ACCATCGGA	CTGAATGAC	GGACGGATA	CTTCGAGTT
env-38	CGTCGTCCTGGCGACGGAAAACAGCCATTAGGCCAGGAGCGGTGCGGGAGATGTGATCTCTCGCACGTTGGA	AAGCA	CGCCC	82	CGACACTAT	CCTCGATAT	CACCAGTAC	GAGGATCAA
env-39	CGTCGTCCTGGCGACAGAAAACAGCCATTAGGCCAGGAGCGGTGCGGGAGATGTGATCTCTCGCACGTTGGA	AAGCA	AGCCC	82	CGTGTTCTA	ACTAGCGAA	TTCCCAGAT	AGCGCAGAA
env-40	ACTCGACTAGACGAGTATAAACAGGCATTAGGTCTAGTGCGCCTCTACACGCCATTTTGCTGTAGAGGGTTGTT	CTAAC	ATCAT	84	TAAGGCACC	GTACGCATT	CCTGTTAGA	GAAACGGAA
env-41	AGTCGTTTGGGCGACTTAAAATAGCTGATTTAGCCCAAAGCGTTCTCAGAGGTAAAACTCTGAGATGTTCAG	TTAAT	ACAAC	82	GGATCAGTG	TGCAGTATC	ACTTAGCTG	ACGCTTCAG
Pel-1-1	ACTGGTTCGAGCCAGTAAAAAAAGGCCGATAAGCTCGAAGCGTTCCACTCTTAGAGTGGAGGAGGC	AATAA	AAGAC	76	GTAGGCTAT	TACGCTTGC	AAACGATCC	GTGAAAAGC
env-42	AGTCGTGCCAGCGACATTAAATAGGCCATTAGGCTGGCAGCCGTCCCGGAGTAACTGGCCGGGGATTGGC	TGAAT	ATCAC	80	AGCTCGTCA	GTGTATGTG	TTCGACGGT	AGCATTGTG
env-43	TCTCGACAGGGCGAGACTAAAGAGACCATTAAGCCCTGAGCGGTCTGCGGATTTTGCGGACGTTGGT	AGTTA	AACTT	77	TCTAGACTG	TTATCGGAC	ATCACGTCC	ATCAGGTCT
env-47	GTTCGTCTGGGCGAACAGAAACAGCCATTAGGCCCAGAGCGGTGTAGGGGCCGGTGTCCCTGCACATTGGA	AGCAC	TTTTC	81	CTTGGAAGT	TGAGTTGGC	AATGGCGGT	AGAAGCGAT
env-48	AGCCGACTGGGCGGCTATAAACAGGCTTCAGGCCCAGAGCGTCAGATGCCGGAAGGCATCTGGGTAGCA	AATCA	GAAAG	79	AATGCTCCG	ACTCCCTGA	GTCTTCGAC	CCAACGTTT
env-49	GCCCGTCACGGCGGCATAAAAATAGCGCATTAGGCCGTGAGCGTTTCCCCTTCTGCCCTGCGCAGCCGGGGAAGGTTGCG	CTTCT	AAAAA	90	TTCGTGTTG	CTCTCCGTT	CACAAGTTC	CTAACCAGG
env-51	AGTCGTTACAGCGACTATAAATAGGGTAATAGGCTGTAAGCGGTTCGTAACGTAATCATCATATGGATGAGCGTTACGGACGAACCA	AGCGA	CTAAA	97	CTACATGCC	CCCTATCTG	AGTAGACGA	GGCTAACTG
env-52	ACTCGTTTGAGCGAGTATAAATAGCTGCTTAGGCTCAAAGCGTATAAAGATTAATTTCTTTATCTGTGCAG	CTGAA	GCGCT	81	TTTCAAGCC	TGATGGGCA	CGCATGAAA	AACACGGTT
env-53	AGTTGTTCCGGCAACTATAAACAGGATTTTAAGCCGGAAGCGTTCAGGCGGTGCAATAGTGCCGCTTGAGGTAATC	TATAA	AAACA	86	ATTTGGCGA	GGAAAAGCC	ACTGTTCCT	ACTGTTCGG
env-54	AGTTGTTTCGGCAACTATAAACAGGATTTTAAGCCGGAAGCGTTCAGGCGGTGCAATAGTGCCGCTTGAGGTAATC	TAAGA	AAACA	86	AGATGTCGA	GTCTAGGCT	AGTGTTCAG	CTCCGCATA
env-56	GCTCGGTGCGGCGAGCCTAAATAGTGCCTTAGGCCGCACGCGTTATGCATAGGTGGCA	GGAGT	TAAAT	68	AGTCAGCTA	AAGCGGGAA	GGAGCACTT	TAGTGTTGG
env-57	AACCGTTAGAGCGGTTAAAAAAAGGTGTTAAGCTCTAAGCGTGGAGGGTTCGCCCTCCGGTCACA	CTAGA	TTAAT	75	CTATTGGGA	GTTCATGGG	CCTTACTGC	TAAGCCGAG
env-59	AACCGTTAGAGCGGTTAAAAATAGGTGTTAGGCTCTAAGCGTGGAGGGTTCGCCCTCCGATCACA	CCCAA	TTAAT	75	GTATGAGGG	CCCTTTGAT	CATGTCCGT	CTGGTTTAC
env-62	AACCGTTAGAGCGGTTAAAAATAGGTGTTAGGCTCTAAGCGTGGAGGGTTCGCCCTCCAGTCACA	TCTAA	TTAAT	75	GGTGCATAT	CCGATTGAT	GCCCATGTT	TGAGACAGA
env-63	AACCGTTAGAGCGGTTAAAAAAAGGTGTTAGGCTCTAAGCGTGGAGGGTTCGCCCTCCAGTCACA	TCTAA	TTAAT	75	CAATCCCTA	GCCAAACCT	GACAACAAC	CACCTGAAC
env-64	AACCGTTAGAGCGGTTAAAAAAAGGTGTTAGGCTCTAAGCGTGGAGGATTCGTCCTCCAGTCACA	TCTAA	TTAAT	75	CCCATCTTA	CATCCTGAG	CTTCGTCAA	CAGTGCTTA
env-66	AACCGTTAGAGCGGTTAAAAATAGGTGTTAGGCTCTAAGCGTGGAGGATTCGTCCTCCAGTCACA	CCCAA	TTAAT	75	AGTGCAGTC	CAGTACGAA	CGGAAGAAT	AGTACGCAT
env-68	ACTCGATTGCGCGAGTATAAAAAGACGATTAAGCGTAAAGCGTTACCCGGATTGTTTGTCCGGGTAGGTTCAG	ACTTA	TAAAT	83	GATTCGTCT	CAAGATTCC	CGGTGTTTA	CACATTTGG
env-69	ACAGGTTTCAGCCTGTATAAATAGGTTATTAAGCTGCAAGCGTTTGCACCTTTAACAGGGTGCAAGGTTAAC	AGAAA	TAAAA	82	GCCAAAGTC	TAACGGTCG	CCTCTTCTA	ATGACAGTG
env-70	ACAGGTTTCAGCCTGTATAAATAGGTTATTAAGCTGAAAGCGTTTGCACCTTTAACAGGGTGCAAGGTTAAC	AGAAA	TAAAA	82	TAGGTCATG	ACTGCTACC	GGTGATTAC	CAAACGGGA
env-73	ACAGGTTGCAGCCTGTATAAATAGGTTATTAAGCTGCAAGCGTTTGCACCTGTAATAGGGTGCAAGGTTAAT	ATTAA	AAAAT	82	CGATAAGGA	CTTACTCAG	TAAGACGCG	AGCACTAAC
env-75	ACAGGTTGCAGCCTGTATAAATAGGTTATTAAGCTGCAAGCGTTTGCACCTGTAATAAGGTGCAAGGTTAAC	TAAAA	TATTA	82	GATGGAACA	TCCTACACG	TGTCTTCTC	GGTGTGTAT
env-76	ACAGGATGCAGCCTGTATAAATAGGTTATTAAGCTGCAAGCGTTTGCACCTGTAATAAGGTGCAAGGTTAAC	ATTAA	TATTA	82	GTGACTGAT	GCACCAAAC	TCTCAACCC	GGCATACAA
env-78	ACAGGTTGTAGCCTGTATAAATAGGTTATTAAGCTGCAAGCGTTTGCACCTGTAATAAGGTGCAAGGTTAAC	ATTAA	TATTA	82	GTCCTACAA	TACGCCTGT	CGTCTTATC	AATAGGGCT
env-85	ACAGGTTGCAGCCTGTATAAATAGGTTATTAAGCTGCAAGCGTATCAATTCCTTCGGGAATTGGTGATTAAC	TAAAA	TTAAA	82	TAGGTGCGA	CGCTTTCAA	AACGGGGTA	ACCAATCTC
env-86	ACAGGTTGTAGCCTGTATAAATAGGTTATTAAGCTGCAAGCGTATCAATTCCTTCGGGAATTGGTGGTTAAC	GTAAA	TAATA	82	CCGTAGCTT	CTGCGATCA	GTGTTGTAC	GTGACTTTG
env-88	ACAGGTTGCAGCCTGTATAAATAGGTTATTAAGCTGCAAGCGTATCAATTCCTTCGGGAATTGGTGGTTAAC	GTAAA	TAATA	82	TTACACGTC	TTTTGGGCC	ATCTGCGAG	CGCTTAGTC
env-92	ACAGGTTGTAGCCTGTATAAATAGGTTATTAAGCTACAAGCGTATCAATCCCTTCAGGGATTGGTGGTTAAC	AGATA	TAATA	82	CTAGACGTA	TGCCCTCAA	AATCCTGGG	TTCTCCACT
env-93	ACAGGTTGCAGCCTGTATAAATAGGTTATTAAGCTACAAGCGTATCAATCCCTTCGGGGATTGGTGGTTAAC	ATTAA	TAATA	82	TCGCACAAC	GCCACCATA	GAACATGGG	GAGCACGAA
env-94	ACAGGTTGTAGCCTGTATAAATAGGTTATTAAGCTACAAGCGTATCAATCCCTTCGGGGATTGGTGGTTAAC	CTATA	TAATA	82	GGCACATAG	GATCATTCG	TTGTCGGTT	GCCTACGTA
env-97	ACAGGTTTCAGCCTGTATAAATAGGTTATTAAGCTGAAAGCGTATCAATCCCTTCGGGGATTGGTGGTTAAC	AGATA	TTAAA	82	TCTGCAGAA	AAGTCTCCG	GTGGTTATG	AAGGCTGCA
env-98	AGTCGACTGGGCGACTTATAAACAGCCGTTAGGCCCGGTGCGTCCGATGAAGCAACTGCTTCGCCGGGGTCGAA	CCTGT	CAACT	84	GAAGTTACG	TAACGACCA	ATGGGTTGT	CTGCTTATG
Lba-1-1	AGCCGTCCCAACGGCTCTAAAAAGTCCATTAAGTTGGGAGCGTCCGGCAGAAATGCCGGGGTTGGA	TATAA	ACAAA	76	AGATCCTCC	GACGTTCTC	TCCAACGAG	TCCTCGTTG
env-99	AGTTGTCCGAGCAGCTATAAACAGTCCATTAAGCTCGGAGCGTTTGGCAGTCTGAGTAAGGCTGTCAAGGTTGGA	TAAAA	AAAAT	85	GCTGTGTTT	ATGAGGCTA	GAACGTCTT	AAATAGGGG
env-100	AGCTGACTCGGCAGCTATAAACAGCCATTAAGCCGAGAGCGTTTGGCAGTCTGAAATAAGGTTGCCAAGGTTGGA	CTAAA	AAATA	85	TCTCCAAAG	CTGGTTAAG	TCGGTGCAA	AGGTCGGTA
env-102	TCTCGACTGAGCGAGTATAAATAGGCATCAAGCTCAGTGCGTCAGCTCGTATCACCCTACGAGCTGGGTTGCA	AACAC	AACAA	83	CCATCTGCT	CACCTCAGT	CCAGAACGT	TTTACGCCC
env-103	AGCCGTCTGGGCGGCTCTAAATAGGTTTTAAGCCCCTAGCGTTCCTCTTTGGAGGAGGTAATA	AGGTA	AACTA	73	ATGACCCTC	GGGATTGTG	GGCGATTAG	ATGGGAAAC
env-104	AGTGGTTGCGATCACTATAAATAGGGCTTTAAGTCGCAAGCGTCCTACCCTTTAGCGGGTAGGGGTAGTC	TAACA	AAACA	80	CGGTACTAT	TGAGCCTTT	TCCGAATCC	TGCACTCTG
env-105	GGTCGACCGGGCGACCTAAAAAAAGCCGTTTGGCCCGGTGCGGGCCCGCCCTCGTGGCGGGTGTCGGA	GTAAA	AATCG	78	AGCATGCGA	TCCTTAACG	TATACGGGC	CGAACCAAT
env-106	AATCGACCAGGCGATTTAAAAAAGCGGTTAGGCCTGGTGCGGCGGTCCCTTGGGGCCGCGTCCAA	TGGAT	ACTAT	75	TCCAGATCA	TTTCGCACT	ACTCCTGGA	ATCGAGTGC
env-107	GGTCGTTCGGGCGACTTAAAACAGAACTTTAAGCCCGAAGCGTTGAGGGTGAAAACCCTCAGGAGTA	ATAAT	TAAAT	77	CTTGTCAGC	GAAAGGGTT	CCGTCTAGA	TCGACAGGT
env-111	GCTCGTCCCGGCGAGCATAAACAGCCGTTAGGCCGGGAGCGGCGGCGCGTACGTGCGCCGCGTCGGG	TATAC	TTTCG	77	TACGTAGGG	ACGGATGTC	GGCAAAAGA	ACAAACCGG
env-112	AGTCGTCTGAGCGACTCTAAATAGCCTCTTAGGCTCAGAGCGTTAGGCCGCTAAGAGACC	ACAAC	GGATA	70	CCTTTCGAT	AACCGAAAC	GAAGTATGG	TTTTAGGGG
env-113	ACTGGTTGCGGCCAGTATAAATAGTCTTTAAGCCGCAAGCGTGTCCTGGAGTTAATCTTCCAGGGCGGTAGCA	GATCA	ATAAT	83	CAGAGTGCT	CAGTGACAC	ACTTCGTAC	AGTGGTTCT
env-114	ACAGGTTTCAGCCTGTATAAATAGTCTTTAAGCTGAAAGCGTTGAAAGGGTTTTTATTAACCCTTTCAGGTAGAA	AAAAA	AAATC	85	GGAGTCTTG	TGTAGGGAC	CATCCTATG	CGGTTAGAT
env-116	ACAGGTTTCAGCCTGTATAAATAGCCTTTAAGCTGAAAGCGTTGAAAGGGTTTTGATTAACCCTTTCAGGTAGAA	AAAAA	AAAAT	85	ACCTACAAC	CTCAACAAC	AGAATAGGG	ATGTCCCTA
env-120	ACTCGACCGTGCGAGTATAAATAGTGTGCTTAGGCACGGTGCGGCAAGAATAATCTTGTATGCAC	CAGCA	GACTC	75	GATCCGGTA	GTCGAGCTA	TTTGGGCAC	GATTGTCCT
Cin-1-1	AATCGACTAGGCGATTTAAAACAGGTGTTAAGCCTAGTGCGGTAAGAGGTATCCCCTCTTACGTCACG	TATAG	TGAGA	78	TTCCGTTCG	GCACAGCTT	AGGGATGCA	CGTGTATGT
Eba-1-1	AATCGACTAGGCGATTTTAAATAGGTGTTAAGCCTAGTGCGGTAAGAGGTATAACCCTCTTGCGTCACG	TGTAC	TGAGA	79	AGTGAATCC	GAGCTCATA	TACGTAACG	TCCCACACT
Eba-1-2	ATTCGACTAGACGAGTATAAATAGGTGTCAGGTCTAGTGCGGCAGGGTTCTTCCCTGCATCATA	GTAAC	AAGGA	74	AGTCTGGTA	ATTGACGGT	GCGAGTTAA	CATCTTACG
env-122	AATCGACTAGACGATAAAAAACAGGTGTTAGGTCTAGTGCGGCAGGGTTCTTCCCTGCGTCACA	TCAAA	TATGA	74	AAGAGGATC	CTTTTCGGC	CAACGTTGG	TTCGCCAAT
Eba-1-3	GATCGACTAGACGATTAAAAACAGGTGTTAGGTCTAGTGCGGCAGGGTTCTTCCCTGCGTCACA	TTAAT	TATGA	74	CTTCTTGAG	TCATCCCCT	ACGGAGGAA	AGGAAGGGA
Eba-1-4	AATCGACTAGGCGATTTAAAATAGGTGTTAAGCCTAGTGCGGCAGGGTTCTTCCCTGCATCACA	TCAAA	AAAAG	74	GTTTAGCGT	TGCAATACC	GGTCAATCC	CATCGTTCG
env-123	ACTCGATCAGACGAGTATAAACAGGTGTTAGGTCTGATGCGTGGGGGCTTTCTGCCCCCGGTCACA	AGCAA	GAAGA	76	CTGTCCTGA	TCAGTCACG	GATAACGGT	CGTGATTGC
env-125	ACTGGACTATGCCAGTATAAATAGCATTTAGGCATAGTGCGGCGGGATAACTCCCGCGTATGA	ACACA	AGTTC	73	AGCTGAACG	TAGCGGTAA	CGCAAAGAA	CCAAGAACC
env-126	ACTGGACTATGCCAGTATAAATAGATTTTAGGCATAGTGCGGCGGGATTCGTCCCGCGTAATA	GACAA	CTGTG	73	CGCATTTGA	TGCCATGCT	TGTCGCAAT	GCGACTCAT
env-128	TCTCGACCGAGCGAGTCAAAACAGGTCTTAGGCTCGGTGCGTCACCGCTCACCACGAGCGGTGGGTGACT	ACAAC	ATTTT	80	AAGCAATGC	GGATGAGGT	GGGATTTGA	AACTCCGAA
env-129	GCTCGTTACAGCGAGTATAAACCGCATTAAGCTGTAAGCGTTCAGGGTTCACGCCCTGAGGTTGTA	AACCA	TAACC	76	GGTGTAGCA	ACGATCGTA	TACTCGCAG	GAGAGTTCC
env-130	ACTCGTTACAGCGAGTATAAACCGCATTAAGCTGTAAGCGTCCGGGAACAAATCCCGGGGTTGTA	AACCA	TTAAC	75	TTCGAACAG	GCGGTATTA	TATCGAGCT	TAAGGGCTT
env-133	AGTGGACTATGCCACTCTAAACCACATTAAGCATAGAGCGTAGAGAGAGTGTTTAAACATTCTCTCTGGTTGTA	TCATA	TAACT	84	AACTGCTGA	GAGTTGAAG	AGCCAAGCA	CCATCTACC
env-134	AGTGGTCTGCACCACTATAAAAAGACATTAAGTGCAGAGCGTAGAGAGAGTGTTTAAACATTCTCTCTGGTTGTT	ATTCA	TAACT	85	GTGGGTTTG	ATTCCAGTC	ATCTCCGTC	CATCGCAAT
env-135	CGTCGGCGTGGCGACGGTAAAAAGGGCATTAAGCCACGAGCGTTGTCAGAAGACAGGTTGCC	AAGCA	ACTTA	72	ACCAACGCA	TGAGGACTG	GTAACTGGC	ATTGAACGC
env-136	AGTCGGTTGGGCGACTATAAAGAGATGAATAAGCCCAACGCGTTTGCCAGATGGCAAGGACATA	CGTCA	TGGTG	74	GTACAGTCT	CAGCACGAT	GAAATGCTG	TCTTGACGT
env-138	AGTCGTTTGGGCGACTATAAACAGACGAATAAGCCCAAAGCGTTTCCTCGTAAGAGGAAGGACGGA	AGTAC	CCCGC	76	CAGTTACTC	CCCACTAGA	CACAGTGCA	GATGTCTTC
env-139	AGTCGTTTGGGCGACTATAAATAGACGAATAAGCCCAAAGCGTTTCCTCGTAAGAGGAAGGACGGT	AGTAC	CCCTG	76	CCAACAAGA	CAGAAAGTC	GCTGTTGTT	CAATCCCCT
env-140	ACAGGTTTGCGCCTGTCTAAATAGGTATTAAGCGCAAAGCGGTGCGAAAGTGTTTAAACACACTTTTGTGCGTTACA	TAAAA	AACTT	87	GAACGTTTG	ATCGACTCC	TGTCTGTAG	CTATGAGGA
env-143	ACAGGTTTGCGCCTGTATAAATAGGTATTAAGCGCAAAGCGGTGCGGATGTGTTTAAACACATTTGCGCGTTACA	TAAAA	AACTT	85	ATATGGGAG	GACTCTACA	GCTGCTTAT	GACCGATTA
env-144	ACAGGTCTGAACCTGTATAAATAGTGTATTAAGTTCAGAGCGGTGCGAAAGTGTTTAAACACTTTTGTGCGTTACA	TAAAA	AACTT	86	AGGTTTGCC	CAAGATCCT	TAATGCCAC	GCTCGCAAT
env-145	ACAGGTTTGCGCCTGTATAAATAGACATTAAGCGCAAAGCGTCCCGCAATTGTTGCGGGGGTTGTA	TAATA	TAACT	76	CCCAAAGAG	AGGCGTCAA	CCCTAGAGA	GATCGAGTG
env-146	AGCCGTCAAGCCGGCTATAAACAGTCCATTAAGACTTGAGCGTTCGCCTGCCGTTGTGGTGGGCGAGGTTGGA	TACAG	AACAA	83	TAAGGTCTC	GCAATAGGG	CTGTCTAGC	TGATAGGGA
env-147	AGTCGTCTGAGCGACTATAAATAGTATTTAAGCTCAGAGCGTTAAGGGGCTAGAGTAAGGAGTGGATGCCAAGCTCTAGTCCCTTAGGTATGC	TGTGA	TGTGA	103	GGGACTAGA	TCCCTCCTA	CACAAATGG	AGCACAGAG
env-149	AGACGTTGCAACGTCTCAAAATAGCCCTTTAGGTTGCAAGCGTGGGACGGTAGCAAGCCGCCCCGGTAGGG	TATAA	TAAAA	81	CCGATGATA	AGATTGGCG	GGCAATCAG	GCGTCTTTC
env-150	AGTCGGTAGAGCGACTTTAAAAAGGCATTAGGCTCTACGCGTTCCAGGAGGAAACTCCTGGAGGTTGTT	CAATT	TAACT	79	ATGTACGCA	TCTCCGTAG	TTACGCTAC	CTAACGATG
env-151	ACAGGTCATAGCCTGTCTAAATAGTCCATTAAGCTATGAGCGCTACAAGCCTATATAACAGGCTTGTAAGTTGGA	CAATA	ACACA	85	CTCCGTAGT	TGCTGATGG	CGTCGAAAA	CTATAGCGG
env-152	ACAGGTCATAGCCTGTCTAAACAGTCCATTAAGCTATGAGCGCTACAAGCCTATATAACAGGCTTGTAAGTTGGA	CAATA	ACACA	85	AACCACACT	AATGCGAGA	AACACTGCA	GCTAGTACT
env-153	ACAGGTCATAGCCTGTCTAAACAGTCCTTTAAGCTATGAGCGTTGCAAGTCTATAACAGGCTTGCAGGTTGGA	GCATA	ACAAA	83	ACACACCGA	GTTGTACAC	TTTATCCGG	AAAGGTCGG
Bam-2-1	GCTCCTCAGGGGGAGAATAAACCGCATTAAGCCCTGAGCGTTCCTGCTTATGCAGGAGGTTGTT	ATCTA	AGTAT	74	TTACGCTCG	GACGTGAAG	GGATTTAGC	TCTCTCGAA
env-154	ACTCGGCTAGGCGAGTATAAACAGACATCAAGCCTAGCGCGTCTATCCCATTCCAAATGGGGTAGGGTTGTA	TAAAC	CAAAC	82	GTGTGAAAG	CTCCATGTA	TAGCAGTGG	CGCAAGATG
env-155	ACTTGTATCGGCAAGTATAAAAAGACATTAAGCCGATAGCGTCCACTCTGTTTAAACAGGGTGGGGTTGTA	AGTAA	TAACT	81	CTCGAAAGT	TAGCTTCAG	CGAAAAGGC	CATGGCATA
env-157	ACTTGTATCGGCAAGTATAAAAAGACATTAAGCCGATAGCGTCCACTCTGTTTAAACGGGGTGGGGTTGTA	TTTAA	TAACT	81	CTAGCTGAA	CGGTCTAAG	GGACATAGC	TCTCGGTAT
env-159	ACTCGACCGAGCGAGTATAAATAGCCATTAGGCTCGGTGCGTCTATCCCTCACACCACGAGGGATAGGGTTGAA	AAATT	GAAAA	84	CGAACACTT	GTCATTCGT	CCCTAAGAC	GGATATCAC
env-160	AGCCGTCCAGGCGGCTATAAATAGGCATTAAGCCTGGAGCGTTTACGGGGTATTGCCCCGTAAGGTTGCA	ATAAC	AAAAT	80	TCACAGGAA	CAAGTGCGA	GGCCCTAAA	AAGCGCATG
env-161	AGCCGTCCAGGCGGCTATAAACAGTGCATTAAGCCTGGAGCGTTTACGGGGGGGTAATACCCCGTAAGGTTGCA	TAGTA	AAAAT	84	GTTTGCTGA	ATTGCAGGC	CAGTGGATT	ACCTTCAGA
env-162	AGCCGTCCAGGCGGCTATAAATAGGCATTAAGCCTGGAGCGTTTACGGGGCAATACCCCGTAAGGTTGCA	ATAAC	AAAAA	80	CCCCTACAA	GGACGTTTA	CCTAGTGCA	GACTGGAAC
env-163	AGCCGACTATGCGGCTATAAATAGGCATTAGGCATAGTGCGTCTGTCCGTCATGTAAGTGACGGGCAGGGTTGTA	CAATA	TTGAA	85	AATTGCGAG	CGCTACTTC	TTCGCGAAC	AGTGACGGA
env-167	CGTCGATTCGACGACGGTAAACAGGGCATTAGGCCGCAAGTGTGGGCGGGAATCCGCCCGGTTGCC	ACAAG	GGGAG	76	ATAACCGGT	TAAACCACG	TTTGGAGTG	ACGTACCCA
env-168	ACCCGTTCCGGCGGGTATAAACAGGGCATTAGGCCGGAAGCGTGGGCGAGATTTCGCCCAGTTGTC	CGCTG	GAAAA	76	GACAATAGG	CGAGTAAGC	ACTACCCAA	TCTTGGGTA
env-169	AGCCGACTGAGCGGCTATAAAAAGGCGTTAGGCTCAGTGCGTGGGGCCCTTCGGGGTCCCGGTCGCA	TGAAA	TTACG	77	CCGTAACTA	AGTACGTCG	TCTCGTTGC	CCGACTTAT
env-171	ACTCGACTAAGCGAGTATAAAAAGAACTTAAGCTTAGTGCGTCTCCTGGATTCACCAGGGGGGTGAAT	GGTTA	TTTTA	78	ACATCCGTA	CCATTGCTT	GTCCGTACT	ACGCCTTTA
env-172	AATCGTTTGAGCGATTCAAAACCACATTAGGCTCAAAGCGTCCGAGTTGTTTAAACGACTCGGGGTTGTA	AAGAA	TAACT	80	TCTCTGCCA	CTGCACTTG	TTTCGGGAA	CACGGCTAA
env-175	TGTGGACTACGCCACAATAAATAGACATTAAAGCGTAGAGCGTCCGAGTTGTTTAAACGACTCGGGGGTTGT	GAGAA	ATAAC	82	TTTCGACCC	ACCGTTTCC	ACAAGGCAA	CGTACGTGA
env-176	GGTGGATTACGCCACAATAAATAGACATTAAGCGTAAAGCGTCCGAGTTGTTTAAACGACTCGGGGTTGTA	AGAAT	TAACT	81	AGAAGCTGA	AGAACCGAG	TTGTTCTCG	CTACGTCAG
Csp-1-1	AGTAGTCATGGCTACTATAAATAGAGACTTAAGCCATGAGCGTTCCCATCTTTGTGATGGGAGGTGTCT	AAAAA	TTCCG	79	TCAACAGGA	CGCTAACAT	TAACCTCGA	AGGTATCGC
env-178	ACTCGTCTGAGCGAGGTAAAATTAGCTCATTAGGCTCAGAGCGTCAGCCTGTAGAAAATTGCAGGCTGGGTTGAG	CAATG	AATTT	85	GCACGATAA	GTTAGGGAG	CGAAGTACG	TGTACGGCT
env-179	AGTCGACTAAGCGACTCTAAACAGCATTTAGGCTTAGTGCGTTCCCCTGCTCACGCGGGGGAGGTATGG	GACCA	AGTCC	79	AGAAGGTCG	TGCCAAACC	AATGGCTAG	AACTAGCGG
env-180	CCAGGTTTGGGCCTGGCTAAATAGATAATTAAGCCCAAAGCGTCCCCACCCTGGTGGGGGGTTTAT	GCCCT	AAACT	76	TACGTCCAT	CTCACACTA	CTAACGTCC	CACCATAAC
env-181	AATCGTTAGGGCGATTTAAAAGAGAGTATTAAGCCCTAAGCGTCCCGACTTTGTCGGGGGTTACA	CACAT	AACTT	75	GTAAATCCC	TACCGTAAC	GCGACCTTT	CTCAGCATG
env-182	AATCGTTAGGGCGATTTAAAAAAGTGTATTAAGCCCTAAGCGTCCCGACTTTGTCGGGGGTTACA	TAAAA	AACTT	75	AGAGGCTAC	GTAAGTCTG	ACTGATGCC	CGACACCTT
env-183	AATCGTATCGGCGATTTAAAAAAGTGTATTAAGCCGATAGCGTCCCGACTTAGTCGGGGGTTACA	TTAAA	AACTT	75	GGAATCGTC	ATGTATGGG	CGTCGATTA	CGTCTTCAA
env-184	ACTCGTTAGGCGAGTATAAATAGACTATTAAGCCCTAAGCGTCCCCAGTGTATTAGCTGGGGGGATAGA	AATAC	ACAAG	79	AGAAGTGAC	TCGCTTCTC	AGCCGCTAT	CCGGTAATA
env-185	GCACGACTATGCGTGCATAAATAGACGTTAGGCATAGTGCGTTAATAGGGCGTAGTGTGCGCAGGCATATTGCACCCTTTTAGGTCGTA	GCGAG	TTAAT	99	AGATGAGCA	CACAGAGTG	AAGCAGCAC	TGCCAGAAA
env-187	ACTCGACTATGTGAGGATAAATAGACACTAAGCATAGTGCGTTTGTATAACGGAAGCCGCTAGCAATAGCAGTGAAAGTTATATGAGGCTGTT	CTGGG	GGGAG	103	CGTTTGTAC	TGGGGACAT	TGAATGTGG	CAGGCGATA
env-189	ACTCGACTATGCGAGGATAAATAGACACTAAGCATAGTGCGTTTGTATGACAGAAGCCGCTAGCAATAGCAGTGAAGGTTATATGAGGCTGTT	CTGGG	GGGAG	103	GATGGCCTA	AATAGTGCC	TCTCAGACA	GAAGTACTG
env-191	ACTCGACTTCGCGAGTATAAATAGGCTTTAGGCGGAGAGCGGTAGGTAGACTATTCTACCTACGTAGTG	TTCTA	TAAAA	79	ACATCTCTG	GGCAAAGAT	TGGTCTCGT	TTACTTGGC
env-192	AGTCGTCATGGCGACTATAAATAGACGTTTAAGCCATGAGCGTTACATAGAATGCAAATTTTATGTAGAGCGTA	TTTTC	ATTTT	84	CTTGGTCGT	TCCCCCATT	TAGCCGCAT	CCATCAGGA
env-193	AGTCGTCATGGCGACTTTAAATAGACATTTAAGCCATGAGCGTTACATAAATTTTATTTTATGTAGGTTGTT	TTTTC	GAAGC	82	CATCTCAAC	CAGTTTGCC	ATACGTGAC	GGGTCAATC
env-194	ACTCGTTAGGGCGAGTATAAATAGAAGTTAAGCCCTAAGCGTTCACTCAACAAAGAGTGAGGTCTGG	AAGCA	ATAAT	77	AAGTCCCAA	TAAGGGAGG	AATCCTTGC	TTGGCCTAC
env-195	GCTCGACTAGGCGAGCCTAAATAGAACTTAAGCCTAGTGCGTCCGGGACTTCGGTTCCGGGGTGTGG	AGTGA	GGGGA	77	GAATCCTTG	GAAACGAAC	TACGGCGAT	CTTAGATGG
env-196	TGCCGACCGAGCGGCACAAAACAGGCATTAGGCTCGGTGCGTTCCTCCGCCACACCACAAGCGGAGGAGGTTGTA	TTCTT	TTAAT	85	ATAGGATGC	GAGTTGACT	GATAATCCG	CCAAGCAAC
env-197	TATCGGCTGCGGCGAGTATAAACAGCCCTTAAGCCCGGCGCGTGGCCACCGCAATGGTGGCCGGTGGGA	AATTA	TGATG	79	AGGGAGGAT	GAGAGCTTA	ACTTTCGCT	GTCGTAAGG
env-199	GCTCGTCATGGCGAGGATAAAAAGGACTTCAGGCCATGAGCGTTGATTGTTGGGACAGATCCTGACAATCAGGTAGTC	AATAA	GGCTA	88	CTTGCTGAC	AGTACTGAC	CGTGGATTT	ATATGGCGC
env-200	CGCCGTTGCGGCGGCGGTAAATAGGCGATTAAGCCGCAAGCGTGCCCGCCGTCGTGCGGGCGGTTCGC	CCCGC	ACATA	78	AGAGCTCAG	CCTCTATCA	GGAAGTAGC	TATTCGCTG
env-201	AGCCGTTGCGGCGGCTATAAATAGGACATTAAGCCGCAAGCGTTGCCCGGTATACCGCCGGGCAGGTTGTC	TTAA	AAATA	80	GGTCTTGTT	ATGTCTTGG	GGGGTGTTT	ACTCGTTTC
env-202	AGCCGTTGCGGCGGCGTTAAATAGTGCATTAAGCCGCAAGCGTTCCCGTCTTAATTGGCGGGGGGTTGCA	TTGCA	AGACA	80	TCACATCTC	AAAACTCCC	CTCGAGACA	TAGCTCGCA
Bli-1-1	AGTCGTGGCGGCGACGTTAAATAGGCATTAAGCCGCCAGCGTTCCCCTCACTGGGGAGGTTGCA	ATTAC	ACAGG	74	TGCGATTGC	CGCCAAAGT	CCTACCTTA	TCACAAACG
Bsp-1-1	AGTCGTGGCGGCGACGTTAAATAGGCATTAAGCCGCCAGCGTTCCCCTCATTGGGGAGGTTGCA	ATAAC	ACAGA	74	TAGGAGCTA	TTTGCAGCC	TTCTAGCCT	CCAAGCTTA
Bso-1-1	AGTCGTGGCGACGACGTTAAATAGGCATTAAGCCGCCAGCGTTCCCCTATTGGGGAGGTTGCA	ATAAC	ACAGG	73	GCTCCTACT	GGACTTGTG	ACTGCGTCA	TCTGCACCA
Bli-3-1	AGTCGTGGCGGCGACGTTAAATAGGCATTAAGCCGCCAGCGTTCCCCACATTGGGGAGGTTGCA	ATAAC	ACAGG	74	AGTGGGTCA	GACGAGTTA	AACGAGAGT	ATGACTAGG
Eha-1-1	CACCGTGGCGGCGGTGTAAAACAAACATTAAGCCGCCAGCGTCCCGGAACAAGGCATTTTCCGATTCTCCGGGGGTTGCA	TAAAC	GTTTA	90	AAGCAGATC	CACTCTCAG	CAACGAGCT	GGTTATCGG
env-203	CGTCGTCTGAGCGACGTTTAAATAGAACTTAAGCTCAGAGCGTTCCCCACTCTAGGGTGGGGAGGTGGCG	CCTTC	TTGAG	80	CAGCCACAT	CTACAGTTG	GAGGTTCAG	TTCGGTGAC
env-204	ACTCGTCTGAGCGAGTATAAATAGGCTTTTGGCTCAGAGCGATTCCTGGAGCGCTGTTTCCAGGGATGTAGCA	CATTC	ATAAT	83	CGAAATCGC	CCTCTGCAA	CCATACCAT	TAGCGAAGT
Bam-1-1	TGTCGCCTGGGCGACTATAAACAGACATTAAGCCCAGAGCGTCCTTCCTGCTACGGGAAGGGGTTGTG	TTAAA	AAAAA	78	CCAGCTTAA	TCCGGAATT	CGAACCACA	ATTGCTGTG
env-206	TCTCGTTTGAGCGAGAATAAAAAGACATTAAGCTCAAAGCGGCTTTGCCGGCAAACCGGCAAGGCGTTGTA	ACTAA	AAAAA	81	ATGCCAGAG	GGCGAGTTT	TAGAAGCCT	CTTGTTCGC
env-207	ACCCGTTGCGGCGGGTCTAAATAGGTGATTAGGCCGCAAGCGTCCCGCCCTCCGTGGGCGGGGGTTCAC	TTAAT	ATTCA	79	AACGACCTA	GGTATTCCA	ATGTGCCGA	AGCGTCCTT
env-208	ACCCGTGGCGGCGGGGATAAATAGCCAGTTAAGCCGCCAGCGCCCCGGCCTTGTGCCGGGAGTCTGG	CGTGA	AAGAA	77	AAGGGCTAT	TAGCTTGGC	ATCTCTCCC	GCTAGCGTT
env-209	ACCCGTTGCGGCGGGTATAAATAGCCAGTTAGGCCGCAAGCGTCCCGGCATTGTGCCGGGGGTCTGG	TTCTA	AAATC	77	TCTGATGGG	GAACTGTGG	CGACTTCTC	CTTGAGTAC
env-210	ACACGTTGCGCCGTGTATAAATAGCCGGTTAGGGCGCAAGCGTCCCGGCATTTTGCCGGGGGTCTGG	TCTAA	AAAGT	77	GTCTCTAGT	TAAGGGGCT	TTTCCTTGC	GCCATTGAC
env-211	ACACGTTGCGCCGTGTATAAATAGCCAGTTAGGGCGCAAGCGTCCCTGCATTTTGCCGGGGGTCTGG	TTTAA	AAAGT	77	AACTTGCCT	CATAGACGT	GCCTTATCC	CACTTGGTT
env-212	ACACGTTGCGCCGTGTATAAATAGCCAGTTAGGGCGCAAGCATCCCGGCATTTTGCCGGGGGTCTGG	CTAAC	AAAGT	77	GAATAGCTG	CCACATTCC	ACCGTATTG	GAAGTACGT
env-213	ACACGTTGCGCCGTGTATAAATAGCCAGTTAGGGCGCAAGCGTCCCGGCATTTTGCCGGGGGTCTGG	TTAAC	AAAGT	77	AATCAAGGC	TGACGACAT	GAACCAATC	GGTGTATGG
env-221	ACACGTTGCGCCGTGTATAAATAGCCAGTTAGGGCGCAAGCGTCCCGGCTCTGCCGGGGGTCTGG	TTAAC	AAAGT	75	AACAGGGGT	CGGTTGTAA	CGTATCCGA	TGGAAGGAT
env-228	ACACGTTGCGGCGTGTATAAATAGCCAGTCAAGCCGCAAGCGTCCCGGCTCTGCCGGGGGTCTGG	GTAAC	AAACA	75	GTACCGTGA	GGGGCTTAT	GGCAATTTC	GTCGGAATC
env-232	ACACGTTGCAACGTGTATAAATAGCCCTTTAGGTTGCAAGCGTCCATCCCTTCGGGGATGGGGTAGGG	TCATA	AAAAC	78	TCCTTCAGG	AACCTCTCA	CCTGAAGAA	ACTGGGTAC
env-233	ACACGTTGCAACGTGTATAAATAGCCCTTTAGGTTGCAAGCGTCCCGCCCATGTGGCGGGGGTAGGG	GTAAC	AATAC	77	CTGATTCGC	TCATCAAGG	CGGGTCATT	GCAGACTAC
env-234	ACCCGTGGCGGCGGGTATAAATAGCCAGTTAAGCCGCCAGCGCTCCCAGGGTGTAAAGCCCTGGGAAGTCTGG	TTCTA	AAGAA	83	CATTCGGGA	TTGGTACCA	TCATTTCGC	ACAGCAACC
env-236	AGTCGTTGCATCGACTATAAAAAGCCCGTTAGGATGCAAGCGTTCCGCCCATTGTGGGCGGAGGTCGGG	AATTA	AAAAC	79	CGCGATTGT	AGAGGGTAG	CTTTTGTGC	GCTGAGTTG
env-237	AGTCGTTCGTGCGACTATAAATAGACCTTAGGCACGAAGCGGGGAGAGTAATCTCCCGTGGCA	AAATA	GCGTG	73	CTCTGTCGT	CTCTAGCTT	CAGCAGCAA	CATGAGCAT
env-238	AGCCGTTCGGGCGGCTATAAACAGACCTCAGGCCCGAAGCGTGGCGGCACCTGCCGCCGGTGGTA	AATAA	AAAAT	75	AGAGGCTTA	GCTGTTGAC	TACTGGAGG	AGGCTTTGC
env-349	AGCCGTTCGGGCGGCTATAAACAGACCTCAGGCCCGAAGCGTGGCGGCACCTGCAGCCGGTGGTA	TAAAA	AAAAT	75	TATCAGGCG	TGGAAAGAC	CACGCATCA	TAAACCAGC
env-350	AGCCGTTCGGGCGGCTATAAACAGACCTCAGGCCCGAAGCGGGGCGGCACCTGCCGCCGGTGGTA	AATAA	AAAAT	75	TCTCTGGGA	GCACCTGAT	AGCTCTGTC	CAGTCGCAA
env-351	AGCCGTTCGGGCGGCTATAAACAGACCTCAGGCCCGAAGCGTGGCGGCCCCTGCCGCCGGTGGTA	TGGCC	AAAAT	75	TATCGGCTC	TAGGTGCTG	GAGGTAAAG	AGGCAGAAT
env-352	AGCCGTTCGGGCGGCTATAAACAGACCTCAGGCCCGAGGCGTGGCGGCCCCTGCCGCCGGTGGTA	TAAAA	AAAAT	75	CTCTCCATG	TTCATAGGC	ACGACAGAC	TGCAACAGG
env-353	AGCCGTTCGGGCGACTATAAACAGGCCTTAGGCCCGAAGCGTGGCGGCACTTGCCGCCGGTGGTA	ATTTT	AAAAA	75	AAGGAGGGT	AGTCTGACA	CAGACGACA	AGTGTTGCC
env-354	AGTCGTTCGGGCGACTATAAACAGGCCTTAGGCCCGAAGCGTGGCGGCAATCTGCCGCCGGTGGTA	AATAA	CAAAT	76	TTGGAGCTC	TGGACAGCT	CAACAATGC	TCCGTGCTT
env-355	AGCCGTTCGGGCGGCTCAAAACAGACCTTAGGCCCGAAGCGTGGCGGCAACCTGCCACCGGTGGTG	TATAA	AAACT	76	CAGCAAGCA	GCACGAACT	CAATGCGAG	CTTGCCAAT
env-356	AGCCGTTCGGGCGGCTCAAAACAGACCTTAGGCCCGAAGCGTGGCGGCAACCTGCCGCCGGTGGTG	TATAA	AAACT	76	GTCCTATGG	TCCGCACTA	ACGAATAGG	CCTTGCTTG
env-357	AGTCGGTCGGGCGACTATAAACAGTCCTTAAGCGCGACGCGTTGCCAGAGTGATCTGGCAGGTGGAA	TAAAC	TTAAT	77	CCGATCTCT	CGTAAGGAG	AAGGAGTAG	AACCGTTAC
env-358	ACTCGGCTAGGCGAGTATAAATAGCCGTCAGGCCTAGCGCGTCCAAGCCTAGCCCCTTCTGGGGCTGGGCGAAGGGTCGGG	CCAAA	AAAAA	91	AGCCTGTCA	CGCCAGAAT	TCATCCCTC	CCTCATGAT
Bsp-2-1	AGTCGTCTGGACGACTAAAAAAAGACATTAGGTCCAGAGCGTTCCGATCATTATTGATCGGAGGTTGTA	TTAAC	ATATA	79	AGTGATGCT	TTGGCCTGT	GATACGACT	CTATCCGAC
env-359	ACTCGACTGAGCGAGTATAAATAGTCCTTAGGCTCAGTGCGGCGCGCGGTCATCATGACGCGCGCGTGGAG	GAGGA	GTAAA	81	TTTGCCTCT	ATCAGAACG	GACGTTTGG	GTCAACTGA
env-360	GGTCGACTATGCGACCTTAAATAGCCTTTAGGCATAGTGCGTCACTATATGAGTGGGTATGG	CGCTT	AAAAG	72	CTGACGCAT	TTCAAAGGG	TCCAAACTC	GCTATCACG
env-361	ACTCGTTAGGGCGAGTATAAATAGCCATTAGGCCCTAAGCGTCAATGATAAGCTCATTGGGTTGGA	AACAA	TATGT	76	GGTACTCAG	CCTCAATCT	GTCCCATGA	TCCTCCGTA
env-362	ACTCGACTATGCGAGTATAAACAGCCTTTAGGCATAGTGCGTTCATAAGATACTTATGAGGTAGAG	TATTA	ACAAT	76	CTAATCCCA	TACGTGTGA	GCAATGGTT	AACACCGCT
env-363	GCTGGTCACGGCCAGTATAAACAGACATTAAGCCGTGAGCGTCTCCTGTTCTGTGAACGGGAGGGTTGTA	TCAAA	TAAC	79	GAGACCTCT	AGTGTGCAT	CCTTGGATA	GGTTCTTAG
env-364	AGAGGTCACAGCCTCTTAAAATAGACATTAAGCTGTGAGCGTCTCCCGTATTAACGGGAGGGTTGTA	GGTAA	TAATC	77	GTGGCATCA	CATCTAGGC	TTGGCAAAC	AGTTCCCGT
env-365	ACTCGTCAGGGCGAGTCTAAATAGCATTTAGGCCCTGAGCGGCTCCCTTCGGGGAGCGTATGA	CCCCC	TCAAC	73	TATTCACCC	CTATGAGCG	CTGGGTTTC	CACGCACTA
env-370	ACTCGTCATGGCGAGTCTAAATAGCATTTAGGCCATGAGCGGCTCCCTTCGGGGAGCGTATGA	CCCCC	TCAAC	73	ACACGCCAA	GAACGCTAA	TAGAACGCC	TGAGGTCAG
env-371	GCTCGTCTGGGCGAGGATAAATAGCTGTTAGGCCCAGAGCGGCTCTTCGGATTGTGTTCCCTCCGCAATCCGGGGAGCGTCAGC	TCAAT	TTGTA	94	TAGCACTCG	AAGAGAACC	GCCAATCTA	CTACCAGAG
env-372	ACTCGACCGGGCGAGTATAAACAGGATTCAGGCCCGGTGCGTCTCCGGGAAGCCCCGGAGGGTATCA	TAGCA	GATCA	77	TGATCGCGT	TGAGCTGAG	CCATGTCTC	TGTAACACG
env-373	ACTCGACCGGGCGAGTATAAACAGGATTCAGGCCCGGTGCGTCTCCCGCGGACGGGTTTGCCGATAGCCCGCGCCGCCGGAGGGTATCA	TAGCA	GATCA	99	ACAGCCGAA	CTACAGCAA	TTGGTTTCG	TTACACCAC
env-374	ACTCGTCAGAGCGAGTATAAATAGCTTTTTAGGCTCTGCGCGTCCTCAAGGTGAAATCCAGATTTGGTAGTAACCTTGAGGGGTAAAG	TCTCA	GTTTT	98	GCAGGAGAA	CAGCCTTAT	CAATCGGAC	GTTGGGCTA
env-375	ACTCGTCAGAGCGAGTATAAATAGCTTTTTAGGCTCTGAGCGTCCTCAAGGTGAAATCCAGATTTGGTAGTAACCTTGGGGGGTAAAG	TCTCA	GTTTT	98	GTGTTCACA	TAACCCTGT	GCTAGACTA	ACCAAACCC
env-380	AGTCGTCTGAGCGACTATAAATAGAGTTCTAGGCTCAGAGCGCCTCCCCTTCGGGGGAGGGAACT	CGTCA	ATGCA	75	TACCTAGCC	CTCCAAGAA	GTAATCGGA	CATTCGTCC
env-381	ACTCGACTAGACGAGTATAAACTACATTAAGCCTAGTGCGTTATAGCCGTAAATAAGAAGTAAACGGCTATAGGTTGTA	TTATA	ATTAG	89	TCCGATAAC	GCGATATCT	GGGATGTTA	CTCGTTGTA
env-382	AGCCGACCGAGCGGCTATAAACAGGGTTCAAGCTCGGAGCGTTCCCTCTTCGGAGGGAGGTATCT	GAAAC	ATCAA	75	ACGCATGTA	AGCTCAAAG	TACCGATAG	GATGGAGGT
env-383	AGCCGACCGAGCGGCTATAAATAGGGTTTAGGCTCGGTGCGTTCCCTCTTCGGAGGGAGGTATCT	AAAAA	AACAA	75	GTGTGTATC	TAAGGGCAC	AGTCACACC	AGCGCATTC
env-384	AGCCGACCGAGCGGCTATAAACAGGATTTAGGCTCGGTGCGTCCTGCCGGAAACGGCAGGGGTATCA	TGAAA	AAATC	77	TTCGGTAGG	GTTGCGGTT	TAGGGCTCT	CTTGTGACG
env-385	AGTGGACCGAGCCACTATAAAGAGGATAATAAGCTCGGAGCGTTCTGCATAAGCAGAGGAATCA	GAGTA	TAAAA	74	ACGATGAAG	AGGATCGAT	GGCTAATAG	CAAAACGGA
env-386	ACTCGTTTGGGCGAGTATAAAAAGAAGATTAAGCCCAAAGCGTTCCGACACGCTCGGAGGTCTTG	ACAAA	CATTT	75	TTACCAGCT	TGGAGAGGA	CGTCTTTGG	CCATCATTG
env-387	AATCGTCTAAGCGATTTCAAAAAAGGTAATTAGGCTTAGAGCGTCCCCGATAATATCGGGGGGTTTAC	TAAAA	AAACT	78	GTACAGCGA	GAAAAGAGG	GCTACGATA	CGCGAAACT
env-388	AGTCGACTAAGCGACAAAAAAAAGGTAATTAGGCTTAGAGCGTCCCCGATATTTCGGGGGGTTTAC	CTAAA	AAACT	76	TTAAAGGGG	CATTGAGCG	GCTTAGCCA	ATGGCATAC
env-389	GCTCGGCTGGGCGAGCATAAATAGGATTCAGGCCCAGTGCGTCCGGGAAGGAGGGCATTTGCCGATGGCCCAAGCTCCCGGGGTATCA	TAGCA	GACAG	98	TCTACAGCC	GAATACGCT	TATGTACCG	TTCGGATAG
env-391	ACTCGGCTGGGCGAGCATAAATAGGATTCAGGCCCAGTGCGTCCGGGAAGGAGGGCATTTGCCGATGGCCCAAGCTCCCGGGGTATCA	TAGCA	GACAG	98	AGTCTGCTT	CACTAGCAG	TGCGTATGA	CACTAGCCA
env-394	TCTCGGCTGGGCGAGCATAAATAGGATTCAGGCCCAGTGCGTCCGGGAAGGAGGGCATTTGCCGATGGCCCAAGCTCCCGGGGTATCA	AGCGG	GACAG	98	AGATCGTAG	CGACAGTTT	TGCGAAGAT	GGAGAGATG
env-395	ACTCGTCTAAGCGAGTCTAAACAGATCTTTAAGCTTAGAGCGTCTCTGGTCATAAAGACCAGAGGGTAGAT	CGGGA	AGAAG	81	ATTGACCCT	AGTTGGGGT	AAATGCACC	TTGTGCCAG
env-396	ACTCGTCTAAGCGAGTCTAAACAGATCTTTAAGCTTAGAGCGTCTCTGGTCTTTATGACCAGAGGGTAGAT	CGGGA	AGAAG	81	GTCTGCGTA	ACAGCGAGA	CACAGAATC	ACTGAAAGC
env-397	ACTCGTCTAAGCGAGTCTAAATAGATCTTTAAGCTTAGAGCGTCTCTGGTCTTTATGATCAGAGGGTAGAT	CGGGA	AATAG	81	TTCGCAAGA	TGATGATGC	CACTTGATC	CAACTGCAC
env-398	ACTGGTCTGAGCCAGTATAAATAGATGCTTAAGCTTAGAGCGTTATAGCCAGTATATGGCTATAGGTGCAA	ACACA	TCGTC	81	TCGCGATCA	GGTGTTAGG	TCTGCTGTG	ACCGTTATG
env-400	ACTCGGCTTGGCGAGTATAAATAGCCATTAAGCCAAGCGCGTCCTTGCCCGGTGTAAAAAACCGGGCAAGGGGTTGGA	GCGAA	AAAAT	88	ATCTACCGT	ACAACAGCC	ACATGCGTG	TAATGCACG
env-401	ACTCGTCTGAGCGAGTATAAATAGGCCACTAGGCTCAGAGCGGCTCCCCAAGTAATTATCTTGGGGGGCGATGGA	TCGCA	AAATA	85	AACACAAGG	CGTTGTCCA	CTCGGTATT	GTGGAAATC
env-402	ACTGGGCAGTGCCAGGATAAACAGGCTTTAGGCGCTGAGCGTTGGCCGCTCTTAACCGGGTGGCCAGGTAGTA	AGCAA	ATAAC	83	GGTCCTTGT	GTATCTCTG	TCATGTGGG	GAGGGGTAT
env-404	ACTGGACAGCGCCAGGATAAACAGGCTTTAAGCGCTGAGCGTTGGCCGCTCTTAACCGGGTGGCCAGGTAGTA	AACAA	ATAAC	83	GTCAATCGA	TAAATCGGC	CCTCTTTCT	GGCTTTTGT
env-405	ACTGGACAGCGCCAGTATAAACAGGCTTTAAGCGCTGAGCGTTGGCCGCTCTTAATTGAGTGGTCAGGTAGTA	AACAA	ATAAA	83	CGTTTCGGA	AGCTTCGTT	CCGATAGCT	TAGCCAAAG
env-406	ACTCGACTAAACGAGTATAAATAGACATTAAGTTTAGTGCGTTACCACTGTGAAAGGTGGTAGGTTGTA	AAATA	ACATG	79	GACGGAATG	CCTTGTAAC	AGGAAACAC	TGCTGTGTT
env-407	AGTCGTCTGAGCGACTTAAAATAGGCTTTAAGCTCAGAGCGTAGCCCTTCGGGGCTGGGTAGTT	TAAAT	AAAAA	74	AATGCGTCG	TGAGGCGAT	TCATCATGC	TGTGCGTTT
env-408	AGTCGTCAGGGCGACTTTAAATAGGCTTTAGGCCCTGAGCGTGACCGGTTCGCCGGTCGGTAGTA	CAGGG	TAAAC	75	GCGAACTAA	CTCAAGTAG	CGGTGTAAC	TACCGTCGA
env-410	GGTCCTCAGGGGGACTTTAAATAGGCTTTAGGTCCTGAGCGTGACCACTGCGGTGGTCGGTAGCA	GTAAT	ATAAT	75	TGTGCGAGA	GAGGTTAGT	CACTGAAAC	ACCACTACC
env-412	ACTCGTCTGAGCGAGTATAAACAGCATATTAAGCTCAGAGCGTCTCCCCGAAAGGGGAGGGTTATG	CGAAC	TGTAA	76	GGTGTCATA	AATCTAGGG	TAGGGAGCT	CTGGACTGA
env-413	GCTCGTCTGAGCGAGGGTAAATAGTGTTTAGGCTCAGAGCGTTCCGGGAAATTGCCGGAGGTACAT	AAAAG	TATTT	76	GATGTTGGC	AGGACCCTT	ACTTCGAGA	ACAACGTTG
env-415	TCTCGTTAGGGCGAGGATAAAAAGACATTAAGCCCTAAGCGTTCTCCTTCGGGAGAGGTTGTA	TTAAA	AAGTT	73	TCGCACTCT	TCCTCTTAG	AAGGTCAGG	AAGCCCAGA
env-416	ACTCGTCAGGGCGAGTATAAACAGTCCATTAGGCCCTGAGCGTCCCCCCACCCGCTGTGGGGGGGTTGGA	TGTGG	TCATT	80	GTAATGGCT	CTACGAAGT	GCAAACAAG	TGCCTTTCG
env-419	CGTCGTCAGGGCGACGTTAAATAGCCATTAGGCCCTGAGCGTCACTTCTCTTCGGAGAAGTGGGTTGGA	ATAGC	CATCT	79	GCTGAACTG	TGGGTAAGA	TAGGTTGTG	TAGGTCCTA
env-420	AGTCGTCAGGGCGACTATAAACAGCCATTAGGCCCTGTAGCGTCCCCTTTGAGGAGGGGGGTTGGA	TTAAC	ATGCG	76	CAACAGCCA	TAGCTCCCT	AAACCGCAT	AGTAAGACG
env-421	AGTCGTTAGGGCGACTATAAACAGACATTAAGCCCTAAGCGTCCCCTACTAGCTAGGGGGGTTGTA	GAAAC	TAACC	76	CCACTCATA	TGACCAGTG	GGGTTGTAT	CAACTAGCA
env-422	AGTCGTCAGGGCGACTATAAACAGCCATTAAGCCCTGTAGCGTCCACACCCCAGCAATCAGGCTGGGGTATATGTATGGTGGGGTTGGA	TTAAC	TATAA	99	CTTAACGAC	TACGATGAC	GTTTGGCTC	CTTCAGCGT
env-423	ACTCGTCCCAGCGAGTATAAATAGGACATTAGGCTGGAGCGGTACATTTGTGCGTTGTC	TTATG	AAACC	69	TTGAGGTGG	GGAACTTTG	TAACCCTTG	ACATCAGTG
env-424	ACTCCTCTGAGGGAGTATAAATAGTCCTTAGGCTCAGAGCGTTACATTTATGTAGGTGGAA	TCTTA	ACCAT	71	TAAGCCCTC	TCTGCAACC	TGATGAGAG	AGAATCCGA
env-425	ACTCGTCTGAGCGAGTATAAATAGTATCCTTAGGCTCAGAGCGTCACATATTTATGTGGGTGGAT	TCCAA	TTTCA	75	GGTTGGTGA	GTGTAACCA	ATCGTGGTT	GCAGCTAGT
env-426	ACTCGTCATAGCGAGTATAAATAGTGTCCTTAGGCTATGTAGCGTTATAATTATAGGTGGAC	TATTA	AACAA	72	ACAACTCGG	GAACGATGG	TCGGTATAC	CTAGCATCA
env-427	AGTCGGCACAGCGACTATAAAAAGGGCTTTAGGCTGTGAGCGTTACGCCCTGAGTGATCAGGGCATAGGTAGCC	TGAAA	AAGAT	84	GCAGACCAT	GATACGTGG	TACGCGTTC	GTCACCTTA
env-428	AGTCGTCACAGCGACTATAAAAAGGGCTTTAGGCTGTGAGCGTTACGCCCTGAGTAATCAGGGCATAGGTAGCC	GAAAA	AAGAT	84	TTCACAAGC	GTCGTTGAA	GATTCAGGT	GAGACTACA
env-429	ACTCGGCTGGGCGAGTATAAACAGTCATTAGGCCCAGAGCGTCCCCTTGGGTGAGATCTCACCCTTGGGGGGTTGAA	TAGGC	AATTT	87	TGGTCTTCC	GATCTTGTC	TCTAGCTCC	CCATAAGCC
env-430	GCTCGTCTGGGCGAGGATAAACAGCTATTAAGCCCAGAGCGTTCCGGCTCTTTATGATTCGGAGGTTTAGC	TCTGT	ATATC	81	ATCTACCCC	ATCCTCGAA	TCACCGTAC	TCGACTTAG
env-431	GCTCGTCTGGGCGAGGATAAACAGCTATTAAGCCCAGAGCGTTCCGGTTATATGATCGGAGGTTTAGC	TCTGC	ATATA	78	TGGAAAGGG	AGTATGGTC	CGATCCAAA	TTCTCCCAC
env-432	ACTCGTCTGAGCGAGTATAAACAGTAATTAAGCTCAGAGCGTCTCGGAGTTATCCGGGGGTTTAG	ATAAG	CAGTT	75	AGGTACGGA	AACCTGGTG	ACATACGGA	AGACGTGTC
env-433	ACTCGTCTGAGCGAGTATAAACAGTAATTAAGCTCAGAGCGTCTCGGAGTGATCCGGGGGTTTAG	ATAAG	CAGTT	75	ATCACTGTG	CGTCGTTAC	CCTCGTTAG	CATCTGGAA
env-435	ACTCGTCTGGGCGAGGATAAACAGTGATTAGGCCCAGAGCGTCCTGGCTCTTTGCCAGGGGTTCAG	GCTTT	TTTAT	76	CTAGTGTGG	TACGACTTG	GATGGCTAC	AGGAGATCA
env-436	GCTCGTCTGGGCGAGGGTAAAAAGTGATTAGGCCCAGAGCGTCCTGGTTGGCCGGATCGGTCTGCTGGGGGTTCAG	TGAAT	CAAAT	86	ATCACACCC	CGACAATCC	CCTATAGGC	ACACTGGCT
env-443	GCTCGTCTGGGCGAGGGTAAATAGTGATTAGGCCCAGAGCGTCCTGGTTGGCCGGATCGGTCTGCTGGGGGTTCAG	TGAAT	CAAAT	86	CGACAGAAG	TAACGGTTC	CCCAGTATG	CATCTGGTG
env-445	GCTCGTCTGGGCGAGGGTAAATAGTGATTAGGCCCAGAGCGTCCTGGTTGGCCGGATCGGTCTGCTGGGGGGTTCAG	TGAAT	CAAAT	87	GGTTAAAGC	CAATGGCAC	GGTCCAATA	TCATGCACC
env-451	ACTCGTCTGGGCGAGTATAAATAGTAATTAGGCCCAGAGCGTCCTGGCGCGATCGCACGATCGGCTGGGGGTTTAG	TGAAG	CTGTA	86	TATCGTCGT	CCCAATACT	CTCTGGTTC	GCTGTGTGA
env-455	ACTCGTCTGGGCGAGTATAAATAGTAATTAGGCCCAGAGCGTCCTGGCACGATCGGCCGGGGGTTTAG	TGGAA	CTGTA	78	AGACTGTGC	GATCTAACC	GGCTTAATC	CTTTTGTCG
Osp-1-1	GCTCGTCTGGGCGAGGGTAAATAGTAATTAGGCCCAGAGCGTCCCGGCTCCTGGTTCGCCGGTCGGGGGTTTAG	TCAAA	CAGTT	84	ATGGGACCT	GGATTAGAC	TCGAAAAGC	CTGGAGCAA
env-456	ACTCGTCTGGGCGAGTATAAATAGTAATTAGGCCCAGAGCGTCCTGGCGCGATCGTGCGGTCGGCCGTGGGTTTAG	TGAAA	CTGTA	86	ACCATCCAG	TCCGTTGAT	TGGTTACTG	AGGAGCATG
env-457	ACTCGTCTGGGCGAGTATAAACAGTAATTAGGCCCAGAGCGTCCTGGCGCGATCGTGCGGTCGGCCGGGGGTTTAG	TGAAA	CTGTA	86	GCAGTCTTC	CGAATGTGA	ATGGTCTGT	GTTGCTGTA
env-458	ACTCGTCTGGGCGAGTATAAATAGTAATTAGGCCCAGAGCGTCCTGGCGCGATCGTGCGGTCGGCCGGGGGTTTAG	TGAAA	CTGTA	86	CACCATTCG	TGCAGCGAT	GAGAGGTAC	TATATCCCC
env-460	ACTCGTCTGGGCGAGTATAAATAGTAATTAGGCCCAGAGCGTCCTGGCGCGATCGCACGATCGACCGGTGGTTTAG	TGAAA	CTGTA	86	GACCAGAAA	TGCAGTCTA	CCAAAACCC	ACGATGACT
env-461	ACTCGTCTGGGCGAGTATAAATAGTAATTAGGCCCAGAGCGTCCTGGCGCGATCGCACGATCGGCCGGGGGTTTAG	TGAAG	CTGTA	86	ATCTATGCG	TGTCCGCAA	ACTGCCAAT	GATTGGAGA
env-466	GCTCGTCTGGGCGAGGGTAAATAGTAATTTGGCCCAGAGCGTCTTGGCCGGAAGTTACCGACCGGGGGTTTAG	AGAAA	AAATA	83	GTAAAGCAG	GTCGAAGTT	CTGGGAATC	CGCATCTCA
env-467	GCTCGTCTGGGCGAGGGTAAAGAGTAATTAGGCCCAGAGCGTCTTGGCTGGCCGGATCGGCCTGCTGGGGGTTTAG	TCAAT	CAATT	86	TTGTTTGCC	CATCAGTGA	CCGTAAACT	GATTCGGAA
env-468	GCTCGTCTGGGCGAGGGTAAACAGTAATTAGGCCCAGAGCGTCTTAGCTGGCCGGATCGGCCTGCTGGGGGTTTAG	GAAAA	CAATT	86	CAAGTAGTG	GGATTCCTT	GGAAAGGAG	CACTACATG
env-472	GTTCGTCTGGGCGAGGGTAAATAGTAATTAGGCCCAGAGCGTCTTGGTTGGCAGATTTGCCAGTCGGGGGGTTAG	TGCAG	AATTT	85	TGTGACAGC	ACTGCAAGG	TCAGGGGAT	CCCCAATAC
env-485	GCTCGTCTGGGCGAGGGTAAATAGTAATTAGGCCCAGAGCGTCTTGGCCGGGAGCTACCGGTCAGGGGTTTAG	TTCAT	CAGTT	83	TCCTAAGTC	AGAGCGAAA	GGTACGATG	TGCGTTACT
env-487	GCTCGTCTGGGCGAGGGTAAATAGTAATTAGGCCCAGAGCGTCTTGGCCGGGAGCTGCCGGTCAAGGGTTTAG	TTCAT	CAGTT	83	CTCAGCAAA	TCGCAAGTA	CACTTATGG	AGCTTCCAA
env-488	GCTCGTCTGGGCGAGGGTAAATAGGAATTAGGCCCAGAGCGTCTTGGCCGGGAGCTGCCGGTCAGGGGTTTAG	TTCAT	CAGTT	83	AAGAGGTGT	GAGGAACAC	GCGTACACT	TAGTTGTCC
env-489	GCTCGTCTGGGCGAGGGTAAATAGTAATTAGGCCCAGAGCGTCTTGGCCGGGAGCTGCCGGTCAGGGGTTTAG	TTCAT	CAGTT	83	CCCAGGTTA	CTAATGGCC	CTAGCCCAA	TCGTTTCCA
env-528	GCTCGTCTGGGCGAGGGTAAATAGTAATTAGGCCCAGAGCGTCTTGGCCGGGAGCTGCCGGCTGGGGGTTTAG	AAATT	CTGTA	83	CAGATGAAC	CCAGTTGCA	ACAGACGAC	ACATTCTGC
env-532	GCTCGTCTGGGCGAGGGTAAATAGTAATTAGGCCCAGAGAGTCTTGGCTGACAGATCTGTCGGTCGGGGGTTAGC	GGAAG	AATTT	85	AATCGGCTA	TTCACGCAA	TAGAGCCAT	ACGGACTAC
env-533	GCTCGTCTGGGCGAGGGTAAATAGTAATTAGGCCCAGAGCGTCTTGGCTGGCAGATCTGCCGGCTGGGGGTTTAG	ATGAA	CAATT	85	TCGGGTTCA	CCTACGTCA	AAGCTGCTC	CTGAAACGG
env-534	GCTCGTCTGGGCGAGGGTAAATAGTAATTAGGCCCAGAGCGTCTTGGCTGGCAGATATGCCGGCTGGGGGTTTAG	ATGAA	CAATT	85	TTACCTCGT	GACCGTACA	TGTGTACTG	CGAGTTAGG
env-536	GCTCGGCGGGGCGAGGGTAAATAGTAATTAGGCCCAGAGCGTCTTGGCTGGCAGATATGCCGGTCGGGGGTTTAG	ACGAA	CAATT	85	CGAGCAGTA	GCTGGATTC	ATAGCGCGT	ATTACGTGC
env-537	GCTCGTCTGGGCGAGGGTAAATAGTAATTAGGCCCAGAGCGTCTTGGCTGGCAAATCTGCCGGTCGGGGGTTTAG	ATGAA	CAATT	85	AGTCACAGG	GCAAGCTAC	ATCAGGTTC	TATCATGCC
env-540	GCTCGTCTGGGCGAGGGGAAATAGTAATTAGGCCCAGAGCGTCTTGGCTGGCAGATCTGCCGGTCGGGGGTTTAG	ACGAA	CAATT	85	CTCGTATGC	TAACGGAGA	CCGACTGTT	ACCGTGGTA
env-541	GCTCGTCTGGGCGAGGTTAAATAGTAATTAGGCCCAGAGCGTCTTGGCTGGCAGATCTGCCGGTCGGGGGTTTAG	ATGAA	CAATT	85	TAGCCTGAT	CGTTGAAAC	TTCGAGCAC	GGCTTATGG
env-542	ACTCGTCTGGGCGAGGGTAAATAGTAATTAGGCCCAGAGCGTCTTGGCTGGCAGATCTGCCGGTCGGGGGTTTAG	AGAAA	CAATT	85	CACAGGATA	GGGATCATT	GATGTCGCT	TGCGTTAGA
env-544	GCTCGTCTGGGCAAGGGTAAATAGTAATTAGGCCCAGAGCGTCTTGGCTGGCAGATCTGCCGGTCGGGGGTTTAG	ATTAA	CAATT	85	ATTGGCAGA	TGCAGACAC	GCAAAGTCC	CGATGGTCA
env-545	GCTCGTCTGGGCGAGGGTAAATAGTAATTAGGCCCAGAGCGTCTTGGCTGGCAGATATGCCGGTCGGGGGTTTAG	ATGAA	CAATT	85	ACTTTCACG	AGGCATAGT	GATCGAGGA	AAAGTGCGT
env-549	GCTCGTCTGGGCGAGGGTAAATAGTAATTAGGCCCAGAGCGTCTTGGCTGGCAGATCTGCCGGTCGGGGGTTTAG	ATGAA	CAATT	85	AACAGGACT	GTGACCTAG	GAGTTCAGA	CTCTTTTGG
env-650	GCGCGTCTGGGCGAGGGTAAATAGTAATTAGGCCCAGAGAGTCTTGGCTGACAGATCTGTCGGTCGGGGGGTTAG	GGAAG	CAATT	85	CGCATTGAA	GGGTTTACT	AAGATGGCG	AGAACGATG
env-651	GCTCGTCTGGGCGAGGGTAAATAGTAATTAGGCCCAGAGAGTCTTGGCTGACAGATCTGTCGGTCGGGGGGTTAG	GGAAG	CAATT	85	GCGATCCAT	ATGGCTTGC	ACTTCAACC	AGATGTGGT
env-657	ACTCGTCTGGGCGAGTATAAATAGTAATTAGGCCTAGAGCGTCCCGGTCAGCTGCCGGGGGTTTAG	AGAAA	CAGTT	76	TGCTAAACG	CATGTAGCC	ATTTCCCTC	GATCTGTAC
env-658	GCTCGTCTGGGCGAGGGTAAACAGTAATTAGGCCCAGAGCGTCCCGGCAGTTGTTGGGGGTTTAG	AATAG	CAGTT	75	TTGGCTGTT	TGCCCAATC	CAAGCGATT	CCTTAGAGG
env-661	GCTCGTCTGGGCGAGTATAAATAGTAATTAGGCCCAGAGCGTCTCGGCAGCTGCCGGGGGTTTAG	AATAG	CAGTT	75	TTTCGCCAA	TTCGGAACC	TAAGGCGGA	GGCTATGTG
env-662	GCTCGTCTGGGCGAGGGTAAAGAGTGATTAGGCCCAGAGCGTCTTGGCCGGAGCTGCCGGCTGGGGGTTCAG	GGTAG	CAAAT	82	GTTACAGCC	CCGAGAGAA	GACCTGTGA	AGGTGCAGT
env-665	GCTCGTCTGGGCGAGGGTAAATAGTAATTAGGCCCAGAGCGTCTTGGCCGGAGCTGCCGGCTGGGGGTTTAG	AATCG	CAAAT	82	TCAAGAGTC	GTATGGGTT	GAACTAAGC	CGTGAGTTC
env-674	GCTCGTCTGGGCGAGGGTAAATAGTAATTAGGCCTAGAGCGTCCCGGTAGCTGCCGGGGGTTTAG	AATAG	CAGTT	75	CTGATTCCG	ACGGACTGT	TCGTAGGTA	ACTAACAGG
env-675	TCTCGTCTGGGCGAGGATAAATAGTAATTAGGCCCAGAGCGTCCCGGCGACTGCCGGGGGTTTAG	AATAG	CAGTT	75	CTGCACCTA	AGGTCCTAC	GGCAAGTTA	TTTCGTGCG
env-676	ACTCGTCTGGGCGAGGATAAATAGTAATTAGGCCCAGAGCGTCCCGGCGGCTGCCGGGGGTTTAG	AGAAA	CAGTT	75	ACGTTACGA	CCATCCAAC	CTGATTGGT	CATAGTCAG
env-677	GCTCGTCTGGGCGAGGGTAAACAGTAATTAGGCCCAGAGCGTTCCGGCTGCTGCCGGGGGTTTAG	AATAG	CAGTT	75	AAATCCCAC	CTCATCAGC	TACAACGCT	TCCGGCTAT
env-680	GCTCGTCTGGGCGAGGGTAAACAGTAATTAGGCCCAGAGCGTCCCGGCTGCTGCCGGGGGTTTAG	AATAG	CAGTT	75	TGGTTCTCC	TTCTGGGAT	CTTCTGAAC	ACGCATTCT
env-683	ACTCGTCTGGGCGAGGGTAAACAGTAATTAGGCCCAGAGCGTCCCGGCAGCTGCCGGGGGTTTAG	AGAAA	CAGTT	75	AGAGACCAA	TGACATCAC	GTCATTGAG	GCTACTAAC
env-684	GCTCGTCTGGGCGAGGGTAAACAGTAATTAGGCCCAGAGCGTCCCGGCAGCTGCCGGGGGTTTAG	AATAG	CAGTT	75	ATCTTTCCG	CCATTAGGG	GGGAACGAA	CTAAACGGG
env-685	ACTCGTCTGGGCGAGGGTAAATAGTAATTAGGCCCAGAGCGTCCCGGCAGCTGCCGGGGGTTTAG	AGAAA	CAGTT	75	TGTCTGATG	TACGACAAC	TGATACCCC	CCTTTGCAG
env-702	ACTCGTCTGGGCGAGGGTAAATAGTAATTAGGCCCAGAGCGTCCCGGCAGTTGCCGGGGGTTTAG	AGAAA	CAGTT	75	CTACTCAGC	TCAGGGATT	ACTGACTGA	GCCAGCAAT
env-704	GCTCGTCTGGGGGAGGGTAAATAGTAATTAGGCCCAGAGCGTCCTGGCAGCTGCCGGGGGTTTAG	ACGAA	CAGTT	75	TTGCGGATT	CGATGTGTG	GTCAGTACC	ACGTTAGGG
env-705	GCTCGTCTGGGCGAGGGTAAATAGTAATTAGGCCCAGAGCGTCCTGGCAGCTGCCGGGGGTTTAG	AATAG	CAGTT	75	CCGGTATTG	CGGTACGTT	CCGAAGAGA	AGGAATGGC
env-706	GCTCGTCTGGGCGAGGGTAAATAGTAATTAGGCCCAGAGCGTCCCGGCAGCTGCCGGGGGTTTAG	AATAG	CAGTT	75	GTACAGACG	ACAGTGGAT	AGTCTAGAC	AACGTAACC
env-711	ACTCGTCTGGGCGAGTATAAATAGTAATTAGGCCCAGAGCGTCCCGGCCGCTGCCGGGGGTTTAG	AGAAA	CAGTT	75	CCCGTAAAG	GTCAATGGT	CATCGCATG	CGAAGTAGT
env-712	ACTCGTCTGGGCGAGTATAAATAGTAATTAGGCCTAGAGCGTCCCGGCTGCTGCCGGGGGTTTAG	AGAAA	CAGTT	75	CCGTAAAGG	TGCCTCTAC	ACACAGTGC	AACCCAACC
env-715	ACTCGTCTGGGCGAGTATAAATAGTAATTAGGCCTAGAGCGTCCCGGTAGCTGCCGGGGGGTTAG	AGAAA	CAGTT	75	TTCTGCACC	AGAGTCGAC	GTACCCACA	GCACACGAT
env-716	ACTCGTCTGGGCGAGTATAAATAGTAATTAGGCCTAGAGCGTCCCGGTAGCTGCCGGGGGTTTAG	AGAAA	CAGTT	75	CAAAGGATG	CTGTAAAGC	GGGTAACAC	AGGATCCAA
env-743	ACTCGTCTGGGCGAGTATAAAGAGTAATTAGGCCTAGAGCGTCCCGGCAGCTGCCGGGGGTTTAG	AGAAA	CAGTT	75	ATTGGGTGC	AACGCCCAT	GCCCGTAAA	GACACAACT
env-747	ACTCGTCTGGGCGAGTATAAATAGTAATTAGGCCTAGAGCGTCCCGGCAGCTGCCGGGGGTTTAG	AGAAA	CAGTT	75	AGACAGGAC	GACTCTATG	GCAGTTTCC	TGTCCGGTT
env-755	ACTCGTCTGGGCGAGTATAAAGAGTAATTAGGCCTAGAGCGTCCCGGCTGCTGCCGGGGGTTTAG	AGAAA	CAGTT	75	GTAAGCACT	CTGGATTGT	CCTGATGTA	GTCGTATAG
env-756	ACTCGTCCGGGCGAGTATAAACTGTAATCAGGCCCAGAGCGTTCCGGCCCTCGTCGGAGGTTTAG	CAAGA	CCTTT	75	TTCCACGTG	TGCTGTGAC	AGAGCCATA	TGGAAATCG
env-757	ACTCGTCTGGGCGAGTATAAACAGTAATTAGGCCCAGAGCGTTCCGGCCTTCGTCGGAGGTTTAG	CAAGA	CATTT	75	TTGCGTAAG	TGTAGGAGA	TATACCACC	CCTGAACTC
env-758	ACTCGTCTGGGCGAGTATAAACAGTAATTAGGCCCAGAGCGTTCCGGCTTTCGTCGGAGGTTTAG	CAAGA	CATTT	75	TCAGGGCAA	TCCAAGTCG	GCTGAGATT	CACTTCCGA
env-759	GCTCGTCTGGGCGAGGATAAATAGTAATTAGGCCCAGAGCGTCTTGGTCGGTATTACCGGCTGGGGGGTTAG	AGCAG	CATTT	82	CGCTTTCGT	TCTTCCACC	GCGTGCAAT	TGCTAGATG
env-760	GCTCGTCTGGGCGAGGATAAATAGTAATTAGGCCCAGAGCGTCTTGGTCGGTATTACCGGCTGGGGGGGTAG	ATGAA	CATTT	82	CTCATCCAA	CACATTAGC	ATCCAAGCC	GAGAGGCTA
env-761	GCTCGTCTGGGCGAGGATGAATAGTAATTAGGCCCAGAGCGTCTTGGTCGGTATTACCGGCTGGGGGGGTAG	ATGAA	CATTT	82	AGGTCTCAG	AAGGTTACG	ATTGGCGAA	ACTTGGATG
env-766	GCTCGTCTGGGCGAGGATGAATAGTAATTAGGCCCAGAGCGTCTTGGTCGGTATTACCGGCTGGGGGGATAG	ATGAA	CATTT	82	GACCAACAA	CTCTGTAAC	GTAGATGCA	AATGCTGAG
env-768	GCTCGTCTGGGCGAGGATGAATAGTAATTAGGCCCAGAGCGTCTTGGTCGGTATTACCGGCTGGGGGGTTAG	ATGAA	CATTT	82	CCAAAAGGA	GGACTACAC	AACGGAGTG	CAGGACTTA
env-780	AGTCGACCTAGCGACTATAAATAGGCTTTAGGCTAGGAGCGTGACCACTTCGGTGGTC	TTATC	GGTAG	68	CCGATGGAA	CTTCGTTGC	ATATCCCAG	CATGTCGTC
env-783	ACTCGTCTGAGCGAGTATAAACACCATTAGGCTCAGAGCGTCCCTTCCCAAGAGAGAAAACCCTATAGGCTCGTTGGGAAGGGGGTTGGA	ATTGA	AATTC	100	AGTAGATCG	GCGTTCGTT	GTTTTCGGG	ACGTAGGCT
env-784	ACTGGACAGAGTCAGTATAAATAGGCTTTAAGCTCTGAGCGTGACCAACTTCGGTTGGTCGGTAGTT	TGGGA	TAACA	77	CAATTCCAG	CACCTGTAT	AGGGGATTG	TGCGATTCT
env-785	ACTCGACTAAGCGAGTATAAAGAGGCATTAGGCTTAGAGCGTGACCAACTTCGGTTGGTCGGTTGTT	TCTAG	TAATT	77	GGACAACCT	AGTGCAAGC	GGGCATCTA	CAAGTCCAT
env-786	ACTCGACCTAGCGAGTATAAACAGGCTTTAGGCTAGGAGCGTGACCACTTCGGTGGTCGGTAGCA	AGGCG	ATAAC	75	AACCTCCAC	TCTGCGTCT	CTCGTCAAT	CTTTCGCAG
env-787	ACTCGTCTGAGCGAGTATAAATAGACATTAGGCTCAGAGCGCCCCCAAGGCTACGTCCTTTGGGGGGTTGAA	TAGGC	AACTT	82	CCACATACT	ATCCGACAT	CTTTCAGAC	CGTACTCAA
env-788	ACTCGTCTGAGCGAGTATAAACCACTTTAGGCTCAGAGCGTCCCCACTTCGGTGGGGGGTAGCA	GCTTA	ATAAT	74	ACTAGGCCT	CGTAGGACT	TCCTTTGAC	AGCCTGAGT
env-789	ACTCGACTAAGCGAGTATAAATAGGCATTAGGCTTAGAGCGTTCCAATGTTGTGAAACATCGGAGGTTGTT	AAGAA	TAACT	81	GGACGTACA	ACCACTGAT	CAAAGTGAG	ACGAGTCTC
env-790	ACTGGACTACGCCAGTATAAATAGGCATTAAGCGTAGTGCGTTCCAATGTTGTGAAACATCGGAGGTTGTT	ACATA	TAATT	81	GACTGATGT	TTTGCCCCA	TAACTGCCG	GATTCAGCA
env-793	ACTGGACTACGCCAGTATAAATAGGCATTAAGCGTAGTGCGTTCCAGTCTTCACAGACTGGAGGTTGTT	AATAA	TAATT	79	GGATTCGCA	AGACTCATC	TGCCCACAT	AGAACGGGT
env-794	ACTTGACTAAGCAAGTATAAACAGGCATTAGGCTTAGAGCGTTCCAGTCTTCGGACTGGAGGTTGTT	TCTAG	TAACT	77	ACGGATCAA	CCGTATCCT	GTACAGAAC	CGGTAATCT
env-795	AGTCGACTAAGCGACTATAAACAGGCATTAGGCTTAGAGCGTTCCAGTCTTCGGACTGGAGGTTGTT	CTAAA	TAATA	77	CCGTGTGAT	GTTTTGGGC	GGTAAGGTC	AGTCGACAC
Lsp-1-1	ACTCGACTAAGCGAGTATAAACAGGCATTAGGCTTAGAGCGTTCTCACGTTATCTGAATGATGATGTGAGAGGTTGCA	AGAAA	ATAGA	88	GGCCGTTAA	AAGGCACAG	GCGAACGTT	CTCGACTTG
env-797	ACTCGACTAAGCGAGTATAAACAGACATTTAGGCTTAGAGCGTTCCCTGTGAAAACGGGGAGGTTGTA	AGCTA	AGACA	78	TGATGGTCG	GCGAGAAGA	TTCACACGA	CGTAATTCG
env-799	GCTCGACTAGGCGAGGATAAATAGACTGTTAAGCCTGGAGCGTTGCCCCTTTCGGGGGCAGGTAGTT	GATCA	AAACA	77	TAAACTGCC	GCAATTGGT	GAAGCTACT	GGATGGAGT
env-801	AGTCGTCTAAGCGACTCTAAAAAGGCTTTAAGCTTAGAGCGTTCGCCCATATTGGGCGAGGTTGTA	AATTC	AAGTT	76	TGGGCGAAA	GCCCATTAG	GCCGATATA	GCACTACTT
env-802	ACTCGACTAAGCGAGAATAAAAAGGCTTTAGGCTTAGAGCGTTCGCCCTTCGGGGCGGGGTAGTA	AAAAC	TTAAC	75	GCTGAGTGT	CAGTAGAAG	TGGTATGAG	ATACAGCGT
env-804	AGTCGTCTAAGCGACTATAAAAAGCTTTAGGCTTAGAGCGTCCACCCCCTCGGGGTGGGGTAGTA	GAAAA	AAGGT	75	CATTCAACC	TGCCATGGA	GTGGGATTC	CATCGTCTC
env-805	AGTCGTCTAAGCGACTATAAAAAGGCTTTAGGCTTAGAGCGTCCACCCATTGGGGTGGGGTAGTA	GAAAA	AAGTT	75	GCTACTTCA	GAGGGTCTA	TCCGAGTTA	AGACTCTGA
env-806	ACCCGACTAGGCGGGTATAAAAAGACTTCAAGCCTAGTGCGTTGCTCCCCCTGTGGGGGGGGCAGGTAGTT	GAATA	AAACA	81	CGTTGATGA	GTAGCTACG	GGTCACGTA	AACACATCC
env-807	ACCCGACCAAGCGGGTATAAAAAGGCTTTAAGCTTGGAGCGTTGCCCTTTCGGGGGCAGGTAGTA	CAATA	AAACC	75	GAGGTGAGA	GACCAGTAT	GAGGAACTA	TCGTCTTGT
env-808	ACTCGACCAAGCGAGTATAAAAAGTCTTTAGGCTTGGTGCGTTGCTCCCCCTGTGGGGGCAGGTAGTA	GATGC	AAACA	78	CCAACTGTC	CTGCTAATC	GGCAATATG	GCCGTAACT
env-809	GCTCGTCTGAGCGAGTAAAAAACACATTAGGCTCAGAGCGTCCCCCATGCACTAAACTGCGTAGACGCTGGTGTTTGGGGGGGTTGAA	CCCGC	AGTTC	98	TCCTACCCT	CACACACCT	AGCGCTAAA	GGTAGGACA
Ssp-1-1	AGTCGTCACGGCGACTCTAAACAGGCTTTAGGCCGTGAGCGTCGCCCCCACAGGGGGCGGGTGGCA	CTGAC	ATAGT	76	AGGCGAAAA	TGTAGCCTG	CTAAGGGTA	CCCTCTTAA
env-810	AGTCGTCACAGCGACTCTAAACAGGCATTAGGCTGTGAGCGTTCCTCCCACTTCGGGAGGAGGTTGTT	AATTC	TTAAT	78	GCACATTCA	CGACTTACA	AATGCCGAC	TGCGAGCTA
env-811	AGTCGTCACAGCGACTATAAATAGGGCTTTAGGCTGTGAGCGTTGATCCCCCGGTTACAAGGGGATCAGGTGGTC	TTAAA	ATTAA	85	GTTGCTAGG	TATAGGAGG	CTAGCTACC	CCCTGCTAA
env-813	AGTGGTTGCAGCCACTATAAACAGGGCTTCAAGCTGCAAGCGTTCCCACTGTCAACGGTGGGAGGTAGTC	TTCCT	AAAAA	80	AGGCTTGAG	TACAAGCGT	ATCAGTTCC	ACGTTCACA
env-814	AGTGGTCATAGCCACTATAAACAGGGCTTTAAGCTATGAGCGTTCCCCGTCAGATTTGACGGGTAGGTAGTC	TAATA	AAAAC	82	CAGCTGTTG	CCTTACTCG	ACACGTCTG	CCACTGTTA
env-815	AGTGGTCATAGCCACTATAAATAGGGCTTTAAGCTATGAGCGTTACCCGTCAAATTTGACGGGTAGGTAGTC	AATAA	ATAAA	82	AGTGAAGTG	TCTCTGTAC	AACCTTGAC	AACGGTGCT
env-816	AGTGGTCATAGCCACTATAAATAGGGCTTTAAGCTATGAGCGTTACCCGTCAAATTTGACGGGCAGGTAGTC	AATAA	ATAAA	82	TGCAACGAA	AGACATCCC	TAGCACACT	TGCACGCTA
env-817	AGTGGTCATAGCCACTATAAACAGGGCTTTAAGCTATGAGCGTTCCTGCTCTTTAGGGCAGGAGGTAGTC	TAATA	ATAAG	80	TGATTCCGA	TTCTAGGCG	TCATCTCCC	GGCTACGTT
env-819	AGTGGTCACAGCCACTATAAACAGGGCTTTAAGCTGTGAGCGTTCCCACTCTTACCGGGTGGGAGATAGTC	AAATA	AAAAA	81	TTTGTGGTG	ATAACGCCT	ACTGGAACA	CCGCAAGAT
env-820	AGTGGTCACAGCCACTATAAACAGGGCTTTAAGCTGTGAGCGTTCCCACTCTTACTGGGTGGGAGATAGTC	AGATA	AAAAA	81	CAGTCTTCA	GATTCCACG	CCTGTAGAT	AGAACCTCG
Bsp-3-1	AGTGGTCATAGCCACTATAAACAGGGCTTTAAGCTATGAGCGTTCCCACTCTTACAGGGTGGGAGGTAGTC	TATAA	AAAAG	81	GGGGTATTG	CACTTAGGC	TTCAGGGAA	TGGAATTGG
env-824	AGTGGTCATAGCCACTATAAATAGGGCTTTAAGCTATGAGCGTTCCCACTCTTACAGGGTGGGAGGTAGTC	TAATG	AAAAG	81	ATGCGTGGT	GGTGTAAAC	GGTCTCAAT	CGACTAGTA
env-825	AGTCGTCAGAGCGACTATAAACAGACTTTAGGCGCTGAGCGTTGACCGTTACAAATGGCGGTCAGGTAGTA	TATAA	AAAAT	81	TCTGCGGTA	TTCGTGGAT	GACGACATA	AATTGGTCG
env-826	AGTGGTCGCAGCCACTATAAATAGGGCTTTAAGCTGTGAGCGTTGACCGTCACAACGGCGGTCAGGTAGTC	TAACA	AGAGA	81	GGAGTAACA	CCATTACAG	CCGGATCTT	TGTCAAGGT
Rsp-1-1	AGTGGTCACAGCCACTATAAACAGGGCTTTAAGCTGTGAGCGTTGACCGTCACAACGGCGGTCAGGTAGTC	ATAAA	AGAGA	81	GAACGGATT	TGAGCGTGT	CTCAACTCG	TTGCACCTT
env-827	AGTGGTCACAGCCACTATAAACAGGGCTTCAGGCTGTGAGCGTTGACCGTCAGAAATGGCGGTCAGGTAGTC	AGATA	AGACA	82	GTACGACAG	CTCAATTCC	GGATGTAGA	ACCCACTTT
env-832	AGTCGTCACAGCGACTATAAAAAGGGCTTTAGGCTGTGAGCGTTGACCGTCAGAAATGGCGGTCAGGTAGTC	ATAAA	AGACA	82	CAGTGAACC	GCTTCCGAT	AGCCTACAA	TGTACCGTG
env-833	AGTGGTTGCAGCCACGATAAACAGGGCTTTAAGCTGCAAGCGTTGATCGCCGTACCCGGCGGTCAGGTAGTC	ATCAA	ATATG	82	TGGCCTTCT	GGCATAACG	GAAGTGTCT	GGAGGGAAA
env-838	AGTCGTTTGAGCGACTATAAATAGGACTTTAGGCTCAAAGCGTTCCCATCTACATAAGATGGGAGGTAGTC	AGAAC	GGCTA	81	CCGTAGAAC	AAGCGAAGA	TACCCGCAA	TTCGGTCAT
env-839	AGTCGTTTGAGCGACTATAAATAGGACTTTAGGCTCAAAGCGTTCCCATCTACATAAGGTGGGAGGTAGTC	AGAAC	GGCTA	81	CCGTAATGA	CCGTCTTTA	ACGTCGGAT	AGTGCCACA
env-842	ACTCGATACGGCGAGTATAAATAGGACTTTAAGCCGTAAGCGTTCCCGCCGCAGGGCGGGAGGTAGTC	ACTAA	AATCC	78	AAAGCGAAC	TGCTATCTG	GCGCAAGTT	CAGGCAAAA
env-843	AGTCGACTAAGCGACTTTAAAAAGGTAATTAGGCTTAGAGCGTTTGACCCCGTTTAAAACGGGGTTGAGGTTTAC	CTAAA	AAACT	85	TGATAAGGG	TGACCAACC	GGGCATGAT	TCTTGAGCG
env-844	AGTGGACTTTGCCACTTTAAAAAGGTAATTAAGCAAAGAGCGTTCAACCTCGTTTAAACGGGGTTGAGGTTTAC	AAAAA	AAACT	84	TGACGAACA	GGGTGTTCA	GCTCAGGTA	ACGTCTACA
env-845	AGTGGACTTTGCCACTAAAAAAAGGTAATTAAGCAAAGAGCGTTTGACCCCGTTTAAACGGGGTTGAGGTTTAC	AAAAA	AAACT	84	TTTACGCGG	CAAGTCAGG	CGCTTAAGG	CTGACTAAG
env-846	AGTGGACTTTGCCACTTAAAAAAGGTAATTAAGCAAAGAGCGTTTGACCCCGTTTAAACGGGGTTAAGGTTTAC	ATGTT	AAACT	84	GCACTTGAG	ACGGGCATA	TCGTCGATT	GGGATAATG
env-847	ACCCGACTGGGCGGGTATAAATAGCCGTCAAGCCCAGTGCGTTACCCACTCAAAGAGTGGGTAGGTCGGA	GAACA	AAGCC	80	ATGTCACGG	GATCACGAC	ACTTCTTCG	TTACCCTGA
env-848	ACCCGACTGGGCGGGTATAAATAGCCGTCAAGCCCAGTGCGTTACCCACTCTTTGAGTGGGTAGGTCGGA	GAACA	AAGCC	80	GTGAAGGAC	GGGCTTTAC	CCACTGAAG	TATTCAGCG
env-849	ACTCGACTAGGCGAGTATAAACCGTGTCAAGCCTAGTGCGTTACCCACTCTTTGAGTGGGTAGGTCACA	AAATA	AAATC	79	TGCTTACTC	GTAGCAATG	TGAAGGGGA	GCGCAAGAA
env-850	ACTCGACTAGGCGAGTATAAACCGTGTCAAGCCTAGTGCGTTACCCACTCTTTTGAGTGGGTAGGTCACA	ATACA	AAATC	80	CAACCTCTT	CCAACAATC	ATCGGTATG	AATAGCCCT
env-853	ACTCGACTAGGCGAGTATAAAGCGTGTTAAGCCTAGTGCGTTACCCACTCAAAAGAGTGGGTAGGTCACA	AAATA	AAATC	80	GGTTAAGTC	TGAGCAAGT	TTTACCGTC	ATGTAGACC
env-854	ACTCGACTAGGCGAGTATAAACAGGTGTCAAGCCTAGTGCGTTACCCACTCAAAAAGAGTGGGTAGGTCACA	GTAAC	TAGAT	82	TCTCCGTTC	CGATTTCAC	GTCAGGAGT	CCGCAAATC
env-855	ACTCGACTGGGCGAGTATAAATAGTTGTTAAGCCTAGTGCGTCATTATAAAATGGGTCAAC	CTTAA	TCAAA	71	ACTAGGTCC	CTAGGATTC	ACTGCGCAA	GTAAGACGG
env-856	ACTCGACTAGACGAGTATAAATAGTTGTTAAGTCTAGTGCGTTATTATAACATTGTTGTAATAGGTCAAA	TCTAA	CAATT	80	TTGGTGGCA	CTCATCGCA	TAAGCTCAG	AGAGCAGAT
env-857	AGTCGACTATGCGACTATAAATAGGCTATTAAGCATAGTGCGTTAAATAAGGTTAGC	ATTAA	AAATA	67	AAAGGTCCA	ACATTGGCC	CACTAACAC	GGCCTAACA
env-858	ACTCGACTATGCGAGTATAAAAAGACATTAGGCATAGTGCGTTATAGACCGTATAACAGCGGTCTATAGGTTGTA	TTAAA	ACATA	85	TCACGTGAC	ATTTCCACG	CTTTAGGTG	GAAATGTCG
Ppo-1-1	ACTCGTCTGAGCGAGTATAAACAGGTCATTAAGCTCAGAGCGTTCACCGGGATCATTCGGTGAGGTTGGC	TAAAA	ACAAG	80	CGAACAAGT	GTCACGGAT	TCCCTTTCT	TGACATGAG
Ppo-3-1	ACTCGTCTGAGCGAGTATAAACAGGTCATTAAGCTCAGAGCGTTCACCGGGATCATGCGGTGAGGTTGGC	TAAAA	ACAAG	80	CATAGCCAC	ACTCGTCAT	CCATTGTAG	GTGTATAGG
Ppo-4-1	ACTCGTCTGAGCGAGTATAAACAGGTCATTAAGCTCAGAGCGTTCACCGGGATCATCCGGTGAGGTTGGC	TAAAA	ACAAG	80	TACATAGCG	AGCTGGTAT	TCGTTTTCG	GTGGTAGTG
Ppo-2-1	GTTCGTCTGAGCGAACGCAAACAGGCCATTAAGCTCAGAGCGTTCACTGGATTCGTCCAGTGAGATTGGC	TAAAA	ACAAG	80	GTTACCCTC	TTGGGCCTA	TAGTCTGTC	CTTTGAACC
Psp-2-1	GTTCGTCTGAGCGAACGGAAACAGGCCATTAGGCTCAGAGCGTTCACTGGATATGTCCAGTGAGGTTGGC	TGAAA	ACCAC	80	ACTCAGAGG	AACTCTGGG	GTAGATGTC	AGGCTGGAT
env-859	CGTCGTCAGGGCGACGTTAAACAGGCCTCAGGCCCTGAGCGTCCCTCGCATCCAGCGAGGGGGTGGCG	GTAAC	GTTAT	78	TTCGTCCAA	CTACATTGG	GGAACCTTA	ACACCAGTA
env-860	CGTCGGCCCGGCGACGTAAAACAGGCATTAGGCCGGGGGCGTCCGCCCCTCGTGGGCGGGGGTTGCA	CCGCA	CATCA	77	CCATCACTC	TTGAGACTC	TGTGCGTAG	ATTACGCCG
env-863	AGCCGACCCGGCGGCGTTAAACAGGCATCAGGCCGGGAGCGTCCCGCCCAACCGGGCGGGGTTGCA	TAATC	AGTCA	76	GCCAATGAG	TCGAGACAA	TGATTTGCC	ACCCTTGGA
env-864	AGTCGTTTGAGCGACTATAAATAGGTGTTTGGCTCAAAGCGGGTAACTATATAGTTATGTCACA	CTTTC	ACAAT	74	CTAGACGAC	CAGTTCAGG	CCCAATTCA	CTCGAATAG
env-865	ACTCGTTAGGGCGAGTATAAAATAGGCCTTTAGGCCCTAAGCGGCTCTCCAACTGGGAGGCGGGGTA	CGGTA	TTGCT	77	AAGTCCTGA	AAAGTTCGC	TCCACAGTG	CCAAGGTAC
env-866	AGTCGTTTGAGCAACTTTAAATAGCAGCCTTAAGCTCAAAGCGTTAGAAGGTATAACGGCCTTCTAGGTGGTT	AATAT	AATTA	83	AGCAAGGTG	GTGTACAGC	ACTCACAAC	CCCCAGAAA
env-867	AGTGGTTTGAGCCACTATAAATAGCACGTTAAGCTCAAAGCGTCCAAGGAGTTATCCGTTGGGGTCGTA	AACTA	CAATA	79	CATTTACGC	GATTTGCCG	AACGCGGAA	GCACCAAGT
env-868	CGTCGTCGTGGCGACGTTAAACAGGTTCTTAAGCCACGAGCGTCACGAATTTTCGTGGGTGAAT	TACGC	TACTA	74	CGACAGTAC	GAGTTACCT	AGAGTCCGT	ATTGTACGG
env-869	CGTCGTTGCAGCGACGAAAAATAGGTTCTTAGGCTGCAAGCGTCACGAATTTTCGTGGGTGAAC	ATGAA	ATTAA	74	TAACGAGGT	CGAGGAAAG	GTTGACAGA	AGCTAATCG
env-870	AGTCGTTGCACTGGCTTAAAATAGGTTCTTAAGGTGCAAGCGTTGACCGCCCTCGCGGCGGTCAGGTGAAC	AATAA	AAACA	81	TCATCGGAA	GGAAGTTGA	AGGACACTA	GATGAACGT
env-871	AGTCGTTGCACCGGCTTAAAATAGGTTCTTAAGGTGCAAGCGTTGACCGCCATTGCGGCGGTCAGGTGAAC	CATAA	AAACA	81	TCCCAATTC	TGGTGCATG	AAGACCTGT	GGAATCCCT
env-873	GGGCGTCTGGACGCCCTAAAACCGCGTTAAGTCCAGAGGCGGGCGACCGGGCGTATCGGTGCCGTCGTG	GCCGC	ATCTC	79	AACAAACCG	CCTTAACAG	CACGAAGGA	GATATGGCG
env-874	GGGCGTCTGGACGCCTAAAACCGCGTTAAGTCCAGAGCGGGCACCGGGCGTATCGGTGCCGTCGTG	GCCGC	ATCTC	76	TGTGATCGC	GTGGAGAAC	TGAGGTTGT	GTCAATGTG
env-875	GGACGGCAGAGCGTCCCTAAATAGGCGTTAAGCTCTGCGCGGGCGCCGACCACCGGGCGCCGTCGTT	ACCAC	CTTCT	77	ACGACGAGA	AGGAGCGTT	CGAGGTGAT	CGAATTGGC
sp-11111	ACTCGTCTGGGCGAGTATAAATAGTAATTAGGCCCAGAGCGTCCCGGCAGCTGCCGGGGGTTTAG	AGAAA	CAGTT	75	TACTCGGAT	TCGAGATCC	GGGAGGTAA	GTGATCGTG
sp-11112	ACTCGTCTGGGCGAGTATAAATAGTAATTAGGCCCAGAGCGTCTTGGTCGGTATTACCGGCTGGGGGTTTAG	AGAAA	CAGTT	82	TTACGGGGA	AAAACAGGC	GGAGATTTG	GTCTGACCT
sp-11113	ACTCGTCTGGGCGAGTATAAATAGTAATTAGGCCCAGAGCGGCAGGGTTCTTCCCTGCGTTTAG	AGAAA	CAGTT	74	ATCTCGTAG	CTATCGTCG	CTACACACT	ACGTCGTCA
sp-11121	ACTCGTCTGGGCGAGTATAAATAGGCTTTAGGCCCAGAGCGTCCCGGCAGCTGCCGGGGGTAGTC	AGAAA	AAAAA	75	GTCGCTTAC	CACCAAAAG	CAGTTTCCG	TTCGATTGG
sp-11122	ACTCGTCTGGGCGAGTATAAATAGGCTTTAGGCCCAGAGCGTCTTGGTCGGTATTACCGGCTGGGGGTAGTC	AGAAA	AAAAA	82	GGTTGACGT	CATCACCGT	GGATATTCG	AACGATGGT
sp-11123	ACTCGTCTGGGCGAGTATAAATAGGCTTTAGGCCCAGAGCGGCAGGGTTCTTCCCTGCGTAGTC	AGAAA	AAAAA	74	CCGAAGCAA	TCGTAGCCT	TGCGATCAC	TACCTGCTC
sp-11131	ACTCGTCTGGGCGAGTATAAATAGACATTAGGCCCAGAGCGTCCCGGCAGCTGCCGGGGGTTGTA	AGAAA	TAACT	75	GTTACGAAG	ACTAGGTGG	TCGGGAAGA	TGGCACAAT
sp-11132	ACTCGTCTGGGCGAGTATAAATAGACATTAGGCCCAGAGCGTCTTGGTCGGTATTACCGGCTGGGGGTTGTA	AGAAA	TAACT	82	ATGCGCATT	GGTATGCTG	ATCGAAGCT	TATTGGGGA
sp-11133	ACTCGTCTGGGCGAGTATAAATAGACATTAGGCCCAGAGCGGCAGGGTTCTTCCCTGCGTTGTA	AGAAA	TAACT	74	GGGCGAATT	CACAATCCC	CAAACACGA	GATAGAGCC
sp-11141	ACTCGTCTGGGCGAGTATAAATAGGTGTTAGGCCCAGAGCGTCCCGGCAGCTGCCGGGGGTCACA	AGAAA	TTAAT	75	GTCCTACTG	AGCTGCTTT	GCTTTAGAC	GGTACAGAC
sp-11142	ACTCGTCTGGGCGAGTATAAATAGGTGTTAGGCCCAGAGCGTCTTGGTCGGTATTACCGGCTGGGGGTCACA	AGAAA	TTAAT	82	GTAAGGAAC	TCTTCAGCA	CACAAAGGC	AGCTAGCCA
sp-11143	ACTCGTCTGGGCGAGTATAAATAGGTGTTAGGCCCAGAGCGGCAGGGTTCTTCCCTGCGTCACA	AGAAA	TTAAT	74	GGTGACACA	GTTCAAGGC	GTTCATAGC	GTCAGGAAA
sp-11151	ACTCGTCTGGGCGAGTATAAATAGTTATTAGGCCCAGAGCGTCCCGGCAGCTGCCGGGGGTTAAC	AGAAA	TAATA	75	CTTGTCAAG	AACGCACTT	CGTCACTGA	TTACCGATC
sp-11152	ACTCGTCTGGGCGAGTATAAATAGTTATTAGGCCCAGAGCGTCTTGGTCGGTATTACCGGCTGGGGGTTAAC	AGAAA	TAATA	82	CCAAACTTC	GAGTATCTG	GTACGTGGA	ACCCAAGGT
sp-11153	ACTCGTCTGGGCGAGTATAAATAGTTATTAGGCCCAGAGCGGCAGGGTTCTTCCCTGCGTTAAC	AGAAA	TAATA	74	GTAGAGGTA	AAACGCTCG	CCTGAAGTG	GCACAGATG
sp-11211	ACTCGTCTGGGCGAGTATAAATAGGTAATTAGGCCCAGAGCGTCCCGGCAGCTGCCGGGGGTTTAG	AGAAA	CAGTT	76	CGGAATTAC	ATTCGCCGT	TACCGAAGG	GTGGAATCT
sp-11212	ACTCGTCTGGGCGAGTATAAATAGGTAATTAGGCCCAGAGCGTCTTGGTCGGTATTACCGGCTGGGGGTTTAG	AGAAA	CAGTT	83	AGCCCAATA	ATGCCTGTA	CGTAGATAG	GGTTGTAAG
sp-11213	ACTCGTCTGGGCGAGTATAAATAGGTAATTAGGCCCAGAGCGGCAGGGTTCTTCCCTGCGTTTAG	AGAAA	CAGTT	75	CTAGCTCCT	CGCGTAACA	AAGGTACCA	AGAAGAGGC
sp-11221	ACTCGTCTGGGCGAGTATAAATAGGGCTTTAGGCCCAGAGCGTCCCGGCAGCTGCCGGGGGTAGTC	AGAAA	AAAAA	76	ATCCGATGC	GAAAGGCAG	AGGCTTAGG	CGCAACAAA
sp-11222	ACTCGTCTGGGCGAGTATAAATAGGGCTTTAGGCCCAGAGCGTCTTGGTCGGTATTACCGGCTGGGGGTAGTC	AGAAA	AAAAA	83	CGCATGCTA	ACTCCATTG	TACGCTGAG	TGTAACGAG
sp-11223	ACTCGTCTGGGCGAGTATAAATAGGGCTTTAGGCCCAGAGCGGCAGGGTTCTTCCCTGCGTAGTC	AGAAA	AAAAA	75	CGATAGACA	GGGATTGAC	GGACATTCC	CTCAGGTTT
sp-11231	ACTCGTCTGGGCGAGTATAAATAGGACATTAGGCCCAGAGCGTCCCGGCAGCTGCCGGGGGTTGTA	AGAAA	TAACT	76	TGGTGAGCT	CACAGAGGA	GCGTCATAG	AGTCCCAAC
sp-11232	ACTCGTCTGGGCGAGTATAAATAGGACATTAGGCCCAGAGCGTCTTGGTCGGTATTACCGGCTGGGGGTTGTA	AGAAA	TAACT	83	TAACCACTC	CATGTAGGT	CCAAAGTTG	CTTTAGCCT
sp-11233	ACTCGTCTGGGCGAGTATAAATAGGACATTAGGCCCAGAGCGGCAGGGTTCTTCCCTGCGTTGTA	AGAAA	TAACT	75	CTGGACAAC	ATAACCGCA	ATACCACTC	GCAGATCGT
sp-11241	ACTCGTCTGGGCGAGTATAAATAGGGTGTTAGGCCCAGAGCGTCCCGGCAGCTGCCGGGGGTCACA	AGAAA	TTAAT	76	CCTTACGTA	CTCAACGCT	GTCCTTCAT	GTCCTCATT
sp-11242	ACTCGTCTGGGCGAGTATAAATAGGGTGTTAGGCCCAGAGCGTCTTGGTCGGTATTACCGGCTGGGGGTCACA	AGAAA	TTAAT	83	GGCCAGATA	AACGAAGAG	GATGATCAG	GCGTTACTG
sp-11243	ACTCGTCTGGGCGAGTATAAATAGGGTGTTAGGCCCAGAGCGGCAGGGTTCTTCCCTGCGTCACA	AGAAA	TTAAT	75	TTTGCCCTT	AGTAGTGTG	ACAGGTGAA	CACTGATCC
sp-11251	ACTCGTCTGGGCGAGTATAAATAGGTTATTAGGCCCAGAGCGTCCCGGCAGCTGCCGGGGGTTAAC	AGAAA	TAATA	76	CGGAAGTTT	TCCAGATTC	GCAACACTC	CTTATGACC
sp-11252	ACTCGTCTGGGCGAGTATAAATAGGTTATTAGGCCCAGAGCGTCTTGGTCGGTATTACCGGCTGGGGGTTAAC	AGAAA	TAATA	83	ACCGTTTGA	GACACGCAA	CCAAGACTC	AGAGTGCAA
sp-11253	ACTCGTCTGGGCGAGTATAAATAGGTTATTAGGCCCAGAGCGGCAGGGTTCTTCCCTGCGTTAAC	AGAAA	TAATA	75	GGTGCATTA	CTGCTGAGA	TTACCCCAG	GAGAATGAC
sp-11311	ACTCGTCTGGGCGAGTGTAAATAGTAATTAGGCCCAGAGCGTCCCGGCAGCTGCCGGGGGTTTAG	AGAAA	CAGTT	75	GGAACTGAA	ACGATACGC	GTACGGAAG	CAACTGTTC
sp-11312	ACTCGTCTGGGCGAGTGTAAATAGTAATTAGGCCCAGAGCGTCTTGGTCGGTATTACCGGCTGGGGGTTTAG	AGAAA	CAGTT	82	AGAACTGGC	ATTACCCGT	CGTTCGGTA	CCTCTCCTT
sp-11313	ACTCGTCTGGGCGAGTGTAAATAGTAATTAGGCCCAGAGCGGCAGGGTTCTTCCCTGCGTTTAG	AGAAA	CAGTT	74	GTAGCACTC	TTCTTCGGG	TCGTTGGAG	TGAGCGTTA
sp-11321	ACTCGTCTGGGCGAGTGTAAATAGGCTTTAGGCCCAGAGCGTCCCGGCAGCTGCCGGGGGTAGTC	AGAAA	AAAAA	75	GGTTTCTGC	CATCCCGAT	TTCTTGGAC	GTTCACCGA
sp-11322	ACTCGTCTGGGCGAGTGTAAATAGGCTTTAGGCCCAGAGCGTCTTGGTCGGTATTACCGGCTGGGGGTAGTC	AGAAA	AAAAA	82	GCAGCATCT	GTCTTTGGC	ATCCAGTAC	GAAGCGTTA
sp-11323	ACTCGTCTGGGCGAGTGTAAATAGGCTTTAGGCCCAGAGCGGCAGGGTTCTTCCCTGCGTAGTC	AGAAA	AAAAA	74	ATCACGGCT	ATGCATGTG	ATTTTCGCC	AAAGGTACC
sp-11331	ACTCGTCTGGGCGAGTGTAAATAGACATTAGGCCCAGAGCGTCCCGGCAGCTGCCGGGGGTTGTA	AGAAA	TAACT	75	GCCAAAACG	ATACGTGCG	GATTCCTGT	GTCGATTGA
sp-11332	ACTCGTCTGGGCGAGTGTAAATAGACATTAGGCCCAGAGCGTCTTGGTCGGTATTACCGGCTGGGGGTTGTA	AGAAA	TAACT	82	ACATACCCG	GTGGTGGAA	CCAGTTTTC	GCTTTTCAC
sp-11333	ACTCGTCTGGGCGAGTGTAAATAGACATTAGGCCCAGAGCGGCAGGGTTCTTCCCTGCGTTGTA	AGAAA	TAACT	74	GAAGACCAC	CGTACTTCA	TTAGGTGCG	CTGTGGGAA
sp-11341	ACTCGTCTGGGCGAGTGTAAATAGGTGTTAGGCCCAGAGCGTCCCGGCAGCTGCCGGGGGTCACA	AGAAA	TTAAT	75	GTCACGATA	CTTTCCCGA	GAGTGAGAG	CAATGAGGC
sp-11342	ACTCGTCTGGGCGAGTGTAAATAGGTGTTAGGCCCAGAGCGTCTTGGTCGGTATTACCGGCTGGGGGTCACA	AGAAA	TTAAT	82	TCCACATCG	GGTGGTACA	GATCAGCTG	AACCTATCC
sp-11343	ACTCGTCTGGGCGAGTGTAAATAGGTGTTAGGCCCAGAGCGGCAGGGTTCTTCCCTGCGTCACA	AGAAA	TTAAT	74	CGTGGTATG	GTATCATGG	CTTAGTGCG	GACAGCAAG
sp-11351	ACTCGTCTGGGCGAGTGTAAATAGTTATTAGGCCCAGAGCGTCCCGGCAGCTGCCGGGGGTTAAC	AGAAA	TAATA	75	GCCGGTTTT	CAGAAGCGA	GTTCTAGCT	AGTACGAGT
sp-11352	ACTCGTCTGGGCGAGTGTAAATAGTTATTAGGCCCAGAGCGTCTTGGTCGGTATTACCGGCTGGGGGTTAAC	AGAAA	TAATA	82	CATCGCAGA	CGCTGGTTA	CAATCGTGC	TCTTACCCC
sp-11353	ACTCGTCTGGGCGAGTGTAAATAGTTATTAGGCCCAGAGCGGCAGGGTTCTTCCCTGCGTTAAC	AGAAA	TAATA	74	GAGTGCGAT	GCCAGTGTT	CTTTCTCTG	CTCGACGAT
sp-11411	ACTCGTCTGGGCGAGTTTAAATAGTAATTAGGCCCAGAGCGTCCCGGCAGCTGCCGGGGGTTTAG	AGAAA	CAGTT	75	CAATTCCGC	GAGAATCGC	CAATCGACT	CTCGTCTAA
sp-11412	ACTCGTCTGGGCGAGTTTAAATAGTAATTAGGCCCAGAGCGTCTTGGTCGGTATTACCGGCTGGGGGTTTAG	AGAAA	CAGTT	82	ACAGACTCC	GTCCGTTAG	AGTGGACTT	ACTGCTTAC
sp-11413	ACTCGTCTGGGCGAGTTTAAATAGTAATTAGGCCCAGAGCGGCAGGGTTCTTCCCTGCGTTTAG	AGAAA	CAGTT	74	CACTCATGC	CCAGATCGA	GATTGAACC	GCTCTACGT
sp-11421	ACTCGTCTGGGCGAGTTTAAATAGGCTTTAGGCCCAGAGCGTCCCGGCAGCTGCCGGGGGTAGTC	AGAAA	AAAAA	75	GTCTCATCA	GGAACACTG	CGATATAGC	CGTAACACT
sp-11422	ACTCGTCTGGGCGAGTTTAAATAGGCTTTAGGCCCAGAGCGTCTTGGTCGGTATTACCGGCTGGGGGTAGTC	AGAAA	AAAAA	82	CGAGGGTTA	CAGACCATA	TCGTAGATC	TGGGTTGAC
sp-11423	ACTCGTCTGGGCGAGTTTAAATAGGCTTTAGGCCCAGAGCGGCAGGGTTCTTCCCTGCGTAGTC	AGAAA	AAAAA	74	AAACGACGC	GCCTAGATG	ATGGCCACT	CTGTGTAAG
sp-11431	ACTCGTCTGGGCGAGTTTAAATAGACATTAGGCCCAGAGCGTCCCGGCAGCTGCCGGGGGTTGTA	AGAAA	TAACT	75	CGAGACTCA	CAAAGGCTA	GGCTCAATT	TTCTCGCCA
sp-11432	ACTCGTCTGGGCGAGTTTAAATAGACATTAGGCCCAGAGCGTCTTGGTCGGTATTACCGGCTGGGGGTTGTA	AGAAA	TAACT	82	CTGGATACA	TACACAGCC	TGATTAGGC	CTACGATAC
sp-11433	ACTCGTCTGGGCGAGTTTAAATAGACATTAGGCCCAGAGCGGCAGGGTTCTTCCCTGCGTTGTA	AGAAA	TAACT	74	GAACAAGCC	TACAGACAG	GCTTCCATG	GAGCTCTCA
sp-11441	ACTCGTCTGGGCGAGTTTAAATAGGTGTTAGGCCCAGAGCGTCCCGGCAGCTGCCGGGGGTCACA	AGAAA	TTAAT	75	TTGGCGTCA	CGTGAGATT	GGGTTATCA	AATCCTGCT
sp-11442	ACTCGTCTGGGCGAGTTTAAATAGGTGTTAGGCCCAGAGCGTCTTGGTCGGTATTACCGGCTGGGGGTCACA	AGAAA	TTAAT	82	ACCATAGGG	CTAAGTACC	CAAATCCGA	GCTACCCTT
sp-11443	ACTCGTCTGGGCGAGTTTAAATAGGTGTTAGGCCCAGAGCGGCAGGGTTCTTCCCTGCGTCACA	AGAAA	TTAAT	74	ATGCGAGAT	GCCACTGTA	TCTGACGAC	TTATCAGGC
sp-11451	ACTCGTCTGGGCGAGTTTAAATAGTTATTAGGCCCAGAGCGTCCCGGCAGCTGCCGGGGGTTAAC	AGAAA	TAATA	75	TTTGTCCGT	GTGCGTATG	GGTGGGATA	GCCAATTCC
sp-11452	ACTCGTCTGGGCGAGTTTAAATAGTTATTAGGCCCAGAGCGTCTTGGTCGGTATTACCGGCTGGGGGTTAAC	AGAAA	TAATA	82	TTTCCTACC	GGTAGAGTG	AAGAGTGCG	ACATGAGCG
sp-11453	ACTCGTCTGGGCGAGTTTAAATAGTTATTAGGCCCAGAGCGGCAGGGTTCTTCCCTGCGTTAAC	AGAAA	TAATA	74	GCTTCGTTT	CCCTTGATG	CATCCGCAA	AGACTGGAG
sp-11511	ACTCGTCTGGGCGAGTATAAACGTAATTAGGCCCAGAGCGTCCCGGCAGCTGCCGGGGGTTTAG	AGAAA	CAGTT	74	TTCGCCTAA	TAACCGAGT	GCGAAAGAT	CTGAAAGGC
sp-11512	ACTCGTCTGGGCGAGTATAAACGTAATTAGGCCCAGAGCGTCTTGGTCGGTATTACCGGCTGGGGGTTTAG	AGAAA	CAGTT	81	GAAGTCGAC	GGAACATCG	AATCTCACG	CAGGCTATG
sp-11513	ACTCGTCTGGGCGAGTATAAACGTAATTAGGCCCAGAGCGGCAGGGTTCTTCCCTGCGTTTAG	AGAAA	CAGTT	73	TGCTAGTTC	GGCACAATC	ATTCGGTGG	CGATGAGTA
sp-11521	ACTCGTCTGGGCGAGTATAAACGGCTTTAGGCCCAGAGCGTCCCGGCAGCTGCCGGGGGTAGTC	AGAAA	AAAAA	74	TCGCCTGAA	ACGTCAGGA	GCGCACAAA	CGAGCAATC
sp-11522	ACTCGTCTGGGCGAGTATAAACGGCTTTAGGCCCAGAGCGTCTTGGTCGGTATTACCGGCTGGGGGTAGTC	AGAAA	AAAAA	81	CCTACAGGT	CCGTGAATA	TTTGAGCAG	CAGATACCT
sp-11523	ACTCGTCTGGGCGAGTATAAACGGCTTTAGGCCCAGAGCGGCAGGGTTCTTCCCTGCGTAGTC	AGAAA	AAAAA	73	TGCGAATCA	GTTCCTATC	CTCGATAAG	CAGCTGATA
sp-11531	ACTCGTCTGGGCGAGTATAAACGACATTAGGCCCAGAGCGTCCCGGCAGCTGCCGGGGGTTGTA	AGAAA	TAACT	74	TGTCTCATC	TCCACCATG	CGGTTACGT	TTACTCGCT
sp-11532	ACTCGTCTGGGCGAGTATAAACGACATTAGGCCCAGAGCGTCTTGGTCGGTATTACCGGCTGGGGGTTGTA	AGAAA	TAACT	81	CCCTATAAC	CCCCGTTAA	GATGAGACC	CCCGAAATC
sp-11533	ACTCGTCTGGGCGAGTATAAACGACATTAGGCCCAGAGCGGCAGGGTTCTTCCCTGCGTTGTA	AGAAA	TAACT	73	AGGAGACGT	TCGTACGAT	TCACGCACT	GAGTGGGTT
sp-11541	ACTCGTCTGGGCGAGTATAAACGGTGTTAGGCCCAGAGCGTCCCGGCAGCTGCCGGGGGTCACA	AGAAA	TTAAT	74	AGAACCTGC	GGGATATTC	TGGCAAGAG	TTCTCTAGC
sp-11542	ACTCGTCTGGGCGAGTATAAACGGTGTTAGGCCCAGAGCGTCTTGGTCGGTATTACCGGCTGGGGGTCACA	AGAAA	TTAAT	81	CCTGCGTTT	AAAGCGGAG	TTCGTGTGT	TAGTGCACC
sp-11543	ACTCGTCTGGGCGAGTATAAACGGTGTTAGGCCCAGAGCGGCAGGGTTCTTCCCTGCGTCACA	AGAAA	TTAAT	73	TTACGGGCT	CCCCGATTA	CTTGGTAGC	GGAATGACG
sp-11551	ACTCGTCTGGGCGAGTATAAACGTTATTAGGCCCAGAGCGTCCCGGCAGCTGCCGGGGGTTAAC	AGAAA	TAATA	74	GTTCTCTGC	CACACTTGC	CCACATCCA	TAAGCGGTA
sp-11552	ACTCGTCTGGGCGAGTATAAACGTTATTAGGCCCAGAGCGTCTTGGTCGGTATTACCGGCTGGGGGTTAAC	AGAAA	TAATA	81	ACTGCACGT	AGGACATCC	GAATAAGGC	TCGAACATC
sp-11553	ACTCGTCTGGGCGAGTATAAACGTTATTAGGCCCAGAGCGGCAGGGTTCTTCCCTGCGTTAAC	AGAAA	TAATA	73	CTCCATTGC	CGAGCTAGT	ATCCTGCTT	ATACCTGTC
sp-12111	ACTCGTCTGAGCGAGTATAAATAGTAATTAAGCTCAGAGCGTCCCGGCAGCTGCCGGGGGTTTAG	AGAAA	CAGTT	75	TATCGGCCT	AGACGTACG	GACGTTACA	GCCATGAAA
sp-12112	ACTCGTCTGAGCGAGTATAAATAGTAATTAAGCTCAGAGCGTCTTGGTCGGTATTACCGGCTGGGGGTTTAG	AGAAA	CAGTT	82	GTCCCAAGT	ATTGTCCCG	TGACGTCGT	AGTGAGTGG
sp-12113	ACTCGTCTGAGCGAGTATAAATAGTAATTAAGCTCAGAGCGGCAGGGTTCTTCCCTGCGTTTAG	AGAAA	CAGTT	74	ATGCTCTGC	CATTGGCCT	ACCGTAGGA	ACACGTCCA
sp-12121	ACTCGTCTGAGCGAGTATAAATAGGCTTTAAGCTCAGAGCGTCCCGGCAGCTGCCGGGGGTAGTC	AGAAA	AAAAA	75	GTACCATGT	TGGAGCATT	GACTACCAG	TCGGCAAAG
sp-12122	ACTCGTCTGAGCGAGTATAAATAGGCTTTAAGCTCAGAGCGTCTTGGTCGGTATTACCGGCTGGGGGTAGTC	AGAAA	AAAAA	82	CCTGATGGT	TTGCCTTCG	CCTAGCTCT	CTTGCTTGA
sp-12123	ACTCGTCTGAGCGAGTATAAATAGGCTTTAAGCTCAGAGCGGCAGGGTTCTTCCCTGCGTAGTC	AGAAA	AAAAA	74	GGACCGAAT	CATGTCACA	ACAGCTGGA	TGCCTCAGT
sp-12131	ACTCGTCTGAGCGAGTATAAATAGACATTAAGCTCAGAGCGTCCCGGCAGCTGCCGGGGGTTGTA	AGAAA	TAACT	75	GTGTTGTCT	ACGCCAGTT	GTCCAACAG	GTGATTCTC
sp-12132	ACTCGTCTGAGCGAGTATAAATAGACATTAAGCTCAGAGCGTCTTGGTCGGTATTACCGGCTGGGGGTTGTA	AGAAA	TAACT	82	AACCGGTAT	CTACAACCA	GAAACAGAG	CATGAGATG
sp-12133	ACTCGTCTGAGCGAGTATAAATAGACATTAAGCTCAGAGCGGCAGGGTTCTTCCCTGCGTTGTA	AGAAA	TAACT	74	GCTCCGAAA	TAGCAACGA	TCCAGTCGA	CTTCAAGTC
sp-12141	ACTCGTCTGAGCGAGTATAAATAGGTGTTAAGCTCAGAGCGTCCCGGCAGCTGCCGGGGGTCACA	AGAAA	TTAAT	75	TCTACTCGT	ACACGCTAC	CAATAGAGC	GTGATGAAC
sp-12142	ACTCGTCTGAGCGAGTATAAATAGGTGTTAAGCTCAGAGCGTCTTGGTCGGTATTACCGGCTGGGGGTCACA	AGAAA	TTAAT	82	AGTACCCCT	AGTCTCAGC	CCTCACTCA	GCTAAGGAA
sp-12143	ACTCGTCTGAGCGAGTATAAATAGGTGTTAAGCTCAGAGCGGCAGGGTTCTTCCCTGCGTCACA	AGAAA	TTAAT	74	CATCGGATA	TGAAGTCGG	CTTGTTGTG	ACGTCCAAC
sp-12151	ACTCGTCTGAGCGAGTATAAATAGTTATTAAGCTCAGAGCGTCCCGGCAGCTGCCGGGGGTTAAC	AGAAA	TAATA	75	CATTAGCGG	CGAAGTGCA	AATGTCGGG	AACGAGACA
sp-12152	ACTCGTCTGAGCGAGTATAAATAGTTATTAAGCTCAGAGCGTCTTGGTCGGTATTACCGGCTGGGGGTTAAC	AGAAA	TAATA	82	TCCGACTAA	ACCCCAGAA	TGCTGCTCT	CAGTAAACG
sp-12153	ACTCGTCTGAGCGAGTATAAATAGTTATTAAGCTCAGAGCGGCAGGGTTCTTCCCTGCGTTAAC	AGAAA	TAATA	74	CCCTGAATG	CGAACTCTA	ACCTGTCTC	CGAAATGTC
sp-12211	ACTCGTCTGAGCGAGTATAAATAGGTAATTAAGCTCAGAGCGTCCCGGCAGCTGCCGGGGGTTTAG	AGAAA	CAGTT	76	GCAACTACC	TTCGCAGTA	CTAGTACAC	TCCGCTGAA
sp-12212	ACTCGTCTGAGCGAGTATAAATAGGTAATTAAGCTCAGAGCGTCTTGGTCGGTATTACCGGCTGGGGGTTTAG	AGAAA	CAGTT	83	GGTGCTAAG	TTGCTCGAC	TAATGCGCT	CTGGTCTTT
sp-12213	ACTCGTCTGAGCGAGTATAAATAGGTAATTAAGCTCAGAGCGGCAGGGTTCTTCCCTGCGTTTAG	AGAAA	CAGTT	75	ACTCCCGAA	CAGCACTAA	GGGTGACAT	ATAGCTGGG
sp-12221	ACTCGTCTGAGCGAGTATAAATAGGGCTTTAAGCTCAGAGCGTCCCGGCAGCTGCCGGGGGTAGTC	AGAAA	AAAAA	76	ACTGATCCA	TGTGACGAT	GACAGGTAA	TTATCTCGC
sp-12222	ACTCGTCTGAGCGAGTATAAATAGGGCTTTAAGCTCAGAGCGTCTTGGTCGGTATTACCGGCTGGGGGTAGTC	AGAAA	AAAAA	83	AGCAGGTGT	TCCTCGCAA	TTCATGGTC	GCTTATCAG
sp-12223	ACTCGTCTGAGCGAGTATAAATAGGGCTTTAAGCTCAGAGCGGCAGGGTTCTTCCCTGCGTAGTC	AGAAA	AAAAA	75	CGATCATTC	GTGTCCATA	ATGCACGTA	GTTGAATCG
sp-12231	ACTCGTCTGAGCGAGTATAAATAGGACATTAAGCTCAGAGCGTCCCGGCAGCTGCCGGGGGTTGTA	AGAAA	TAACT	76	TATCCGGAG	CGGAAACTT	CCTAGGTAG	TAAGAGGCA
sp-12232	ACTCGTCTGAGCGAGTATAAATAGGACATTAAGCTCAGAGCGTCTTGGTCGGTATTACCGGCTGGGGGTTGTA	AGAAA	TAACT	83	TGACAGGAT	TAGAGCACA	AGAGTCTCT	GCAGATGTT
sp-12233	ACTCGTCTGAGCGAGTATAAATAGGACATTAAGCTCAGAGCGGCAGGGTTCTTCCCTGCGTTGTA	AGAAA	TAACT	75	GCGCAGTAA	CTTATCGTC	CTGCCTTAG	ACGGGTCTT
sp-12241	ACTCGTCTGAGCGAGTATAAATAGGGTGTTAAGCTCAGAGCGTCCCGGCAGCTGCCGGGGGTCACA	AGAAA	TTAAT	76	GCACAGAGT	AGCACTCGT	TTAGTCAGC	CCAGTGTAA
sp-12242	ACTCGTCTGAGCGAGTATAAATAGGGTGTTAAGCTCAGAGCGTCTTGGTCGGTATTACCGGCTGGGGGTCACA	AGAAA	TTAAT	83	GATGTGGTG	GCTTGCCAT	CACCGGTAA	CGTCAAATG
sp-12243	ACTCGTCTGAGCGAGTATAAATAGGGTGTTAAGCTCAGAGCGGCAGGGTTCTTCCCTGCGTCACA	AGAAA	TTAAT	75	TTGAGTCAC	AGTTCGAAC	ACTGACCGT	TCAGTGCCA
sp-12251	ACTCGTCTGAGCGAGTATAAATAGGTTATTAAGCTCAGAGCGTCCCGGCAGCTGCCGGGGGTTAAC	AGAAA	TAATA	76	CGACAAAGA	GTACATCAC	CCCAAACTA	ACTCAGCAG
sp-12252	ACTCGTCTGAGCGAGTATAAATAGGTTATTAAGCTCAGAGCGTCTTGGTCGGTATTACCGGCTGGGGGTTAAC	AGAAA	TAATA	83	GTATGACCG	TGCAGCAGT	CCACAACAC	AATGACGCA
sp-12253	ACTCGTCTGAGCGAGTATAAATAGGTTATTAAGCTCAGAGCGGCAGGGTTCTTCCCTGCGTTAAC	AGAAA	TAATA	75	AGTCTGCAG	GCTCTCGTT	AAACCAGCC	AGGCTGAAC
sp-12311	ACTCGTCTGAGCGAGTGTAAATAGTAATTAAGCTCAGAGCGTCCCGGCAGCTGCCGGGGGTTTAG	AGAAA	CAGTT	75	CTCACATGA	CTCATTGTG	CAAGTGTCC	TACGACACG
sp-12312	ACTCGTCTGAGCGAGTGTAAATAGTAATTAAGCTCAGAGCGTCTTGGTCGGTATTACCGGCTGGGGGTTTAG	AGAAA	CAGTT	82	GCCAATGGA	AGCCTCATA	ACGCGTAGT	GAGATTGCA
sp-12313	ACTCGTCTGAGCGAGTGTAAATAGTAATTAAGCTCAGAGCGGCAGGGTTCTTCCCTGCGTTTAG	AGAAA	CAGTT	74	CACTTCACC	GCGTTAACA	ACACAAGGC	AGTCAGGTT
sp-12321	ACTCGTCTGAGCGAGTGTAAATAGGCTTTAAGCTCAGAGCGTCCCGGCAGCTGCCGGGGGTAGTC	AGAAA	AAAAA	75	CACTGCAAA	CTACGGAGA	ACGACCTGA	CAGGGAAAC
sp-12322	ACTCGTCTGAGCGAGTGTAAATAGGCTTTAAGCTCAGAGCGTCTTGGTCGGTATTACCGGCTGGGGGTAGTC	AGAAA	AAAAA	82	TCGTCACAG	CAAACCTAC	TGGCGGAAA	ACTCTGGTC
sp-12323	ACTCGTCTGAGCGAGTGTAAATAGGCTTTAAGCTCAGAGCGGCAGGGTTCTTCCCTGCGTAGTC	AGAAA	AAAAA	74	GGCCAAAAT	AGCATAACC	GCAAACAGC	CATACGTCT
sp-12331	ACTCGTCTGAGCGAGTGTAAATAGACATTAAGCTCAGAGCGTCCCGGCAGCTGCCGGGGGTTGTA	AGAAA	TAACT	75	AAAGTGCTG	TGTCTCGAT	TACGTGCGT	TACCACACC
sp-12332	ACTCGTCTGAGCGAGTGTAAATAGACATTAAGCTCAGAGCGTCTTGGTCGGTATTACCGGCTGGGGGTTGTA	AGAAA	TAACT	82	TAGCAGAAG	ACTTGTTCC	CTCAGTTCT	GAGACCCAT
sp-12333	ACTCGTCTGAGCGAGTGTAAATAGACATTAAGCTCAGAGCGGCAGGGTTCTTCCCTGCGTTGTA	AGAAA	TAACT	74	TGTCACACA	AAGCACTCA	AAACTCCGA	ACGGAGAAC
sp-12341	ACTCGTCTGAGCGAGTGTAAATAGGTGTTAAGCTCAGAGCGTCCCGGCAGCTGCCGGGGGTCACA	AGAAA	TTAAT	75	GGGTAATCC	TCGCTAGTC	GGCTCACAT	TGCGATGAA
sp-12342	ACTCGTCTGAGCGAGTGTAAATAGGTGTTAAGCTCAGAGCGTCTTGGTCGGTATTACCGGCTGGGGGTCACA	AGAAA	TTAAT	82	AGTTCTTCC	GAAGGGTCA	TGCTCCAAC	TGCCAACTG
sp-12343	ACTCGTCTGAGCGAGTGTAAATAGGTGTTAAGCTCAGAGCGGCAGGGTTCTTCCCTGCGTCACA	AGAAA	TTAAT	74	TTAGACGGA	TTATCGCTC	GCCATCCTT	CACCGACTA
sp-12351	ACTCGTCTGAGCGAGTGTAAATAGTTATTAAGCTCAGAGCGTCCCGGCAGCTGCCGGGGGTTAAC	AGAAA	TAATA	75	ATAGCTCTG	CAGATTGAC	GGACTTGGA	GTGACATCT
sp-12352	ACTCGTCTGAGCGAGTGTAAATAGTTATTAAGCTCAGAGCGTCTTGGTCGGTATTACCGGCTGGGGGTTAAC	AGAAA	TAATA	82	GCCGTTCAA	GTTGCTCTT	GCCTCTAGA	ATCTGGGTG
sp-12353	ACTCGTCTGAGCGAGTGTAAATAGTTATTAAGCTCAGAGCGGCAGGGTTCTTCCCTGCGTTAAC	AGAAA	TAATA	74	TTTCGCTCA	TCTATCACC	GGTGTTGTG	CATAAGCCG
sp-12411	ACTCGTCTGAGCGAGTTTAAATAGTAATTAAGCTCAGAGCGTCCCGGCAGCTGCCGGGGGTTTAG	AGAAA	CAGTT	75	ACTCACTGG	CACGACAAT	TCTAGTGCC	GTGTGTTGG
sp-12412	ACTCGTCTGAGCGAGTTTAAATAGTAATTAAGCTCAGAGCGTCTTGGTCGGTATTACCGGCTGGGGGTTTAG	AGAAA	CAGTT	82	CCTGTCATT	TATGCGTGG	ACAGACTTG	TGGGGGTAA
sp-12413	ACTCGTCTGAGCGAGTTTAAATAGTAATTAAGCTCAGAGCGGCAGGGTTCTTCCCTGCGTTTAG	AGAAA	CAGTT	74	CACTGACAT	ATTCCCTCC	GGGATACGA	CGTTGTGAA
sp-12421	ACTCGTCTGAGCGAGTTTAAATAGGCTTTAAGCTCAGAGCGTCCCGGCAGCTGCCGGGGGTAGTC	AGAAA	AAAAA	75	CTTCGAAAG	CTGCAAGAG	GATCTCAAG	AAAAGCGAC
sp-12422	ACTCGTCTGAGCGAGTTTAAATAGGCTTTAAGCTCAGAGCGTCTTGGTCGGTATTACCGGCTGGGGGTAGTC	AGAAA	AAAAA	82	TCTTTAGGC	AGCCGTCAT	AACTGTAGG	GAACCGATA
sp-12423	ACTCGTCTGAGCGAGTTTAAATAGGCTTTAAGCTCAGAGCGGCAGGGTTCTTCCCTGCGTAGTC	AGAAA	AAAAA	74	CGGATAGGT	AATTGCTGC	GGGACCAAA	ACTCCCCTA
sp-12431	ACTCGTCTGAGCGAGTTTAAATAGACATTAAGCTCAGAGCGTCCCGGCAGCTGCCGGGGGTTGTA	AGAAA	TAACT	75	TACCGGATC	CTCTAAGCA	TGGCCCTAT	AAGAGACTG
sp-12432	ACTCGTCTGAGCGAGTTTAAATAGACATTAAGCTCAGAGCGTCTTGGTCGGTATTACCGGCTGGGGGTTGTA	AGAAA	TAACT	82	AACGTCACT	GCTCTGATG	AGCAATTGC	TCTGCTTGT
sp-12433	ACTCGTCTGAGCGAGTTTAAATAGACATTAAGCTCAGAGCGGCAGGGTTCTTCCCTGCGTTGTA	AGAAA	TAACT	74	TTTGTCTGG	GGATAGCAA	CCGTTTGCA	TGGAATGTG
sp-12441	ACTCGTCTGAGCGAGTTTAAATAGGTGTTAAGCTCAGAGCGTCCCGGCAGCTGCCGGGGGTCACA	AGAAA	TTAAT	75	GATCAACAC	ATCGACAGC	GGGTTAAGT	TGCAACTCG
sp-12442	ACTCGTCTGAGCGAGTTTAAATAGGTGTTAAGCTCAGAGCGTCTTGGTCGGTATTACCGGCTGGGGGTCACA	AGAAA	TTAAT	82	TTGTGACTG	TTAGGCTTG	GTGACCTTC	TCAGTTTGG
sp-12443	ACTCGTCTGAGCGAGTTTAAATAGGTGTTAAGCTCAGAGCGGCAGGGTTCTTCCCTGCGTCACA	AGAAA	TTAAT	74	TGGACCGTA	TCGTGGTCT	ATTGGCCAG	CACCTATAC
sp-12451	ACTCGTCTGAGCGAGTTTAAATAGTTATTAAGCTCAGAGCGTCCCGGCAGCTGCCGGGGGTTAAC	AGAAA	TAATA	75	GCATGTAAG	GCGGCAATA	CGACGCTTA	TGAGGGTTC
sp-12452	ACTCGTCTGAGCGAGTTTAAATAGTTATTAAGCTCAGAGCGTCTTGGTCGGTATTACCGGCTGGGGGTTAAC	AGAAA	TAATA	82	CAAACTCCG	CTTTATGCG	TATCGGTGG	AGTCTCTCA
sp-12453	ACTCGTCTGAGCGAGTTTAAATAGTTATTAAGCTCAGAGCGGCAGGGTTCTTCCCTGCGTTAAC	AGAAA	TAATA	74	ATGCACAGC	ACGCAAGGA	GATCGCGAA	TAGGCAAGC
sp-12511	ACTCGTCTGAGCGAGTATAAACGTAATTAAGCTCAGAGCGTCCCGGCAGCTGCCGGGGGTTTAG	AGAAA	CAGTT	74	GAACCAGTA	GACCTCGAA	TCCTGACCT	GCCAAATGG
sp-12512	ACTCGTCTGAGCGAGTATAAACGTAATTAAGCTCAGAGCGTCTTGGTCGGTATTACCGGCTGGGGGTTTAG	AGAAA	CAGTT	81	CTGTCGTAG	GCGATGAGA	ATACTCGGC	CAGAACTAG
sp-12513	ACTCGTCTGAGCGAGTATAAACGTAATTAAGCTCAGAGCGGCAGGGTTCTTCCCTGCGTTTAG	AGAAA	CAGTT	73	TGGCGCTAA	TCGATACTG	GCCCAAGAT	CAGGAAAGC
sp-12521	ACTCGTCTGAGCGAGTATAAACGGCTTTAAGCTCAGAGCGTCCCGGCAGCTGCCGGGGGTAGTC	AGAAA	AAAAA	74	TCCTCTGGA	ACGAGAAAC	TCGTACACC	TACCGAGAA
sp-12522	ACTCGTCTGAGCGAGTATAAACGGCTTTAAGCTCAGAGCGTCTTGGTCGGTATTACCGGCTGGGGGTAGTC	AGAAA	AAAAA	81	TGGGGATTC	ATTGGTCCC	ACCTGTGGT	CTCGATATC
sp-12523	ACTCGTCTGAGCGAGTATAAACGGCTTTAAGCTCAGAGCGGCAGGGTTCTTCCCTGCGTAGTC	AGAAA	AAAAA	73	CAACCTAAC	GGTTAGTAG	TGTGTGACT	TTCGTCGCT
sp-12531	ACTCGTCTGAGCGAGTATAAACGACATTAAGCTCAGAGCGTCCCGGCAGCTGCCGGGGGTTGTA	AGAAA	TAACT	74	GACACTACG	ATGAGCCCT	GAGTCCACA	TCTGGTTGA
sp-12532	ACTCGTCTGAGCGAGTATAAACGACATTAAGCTCAGAGCGTCTTGGTCGGTATTACCGGCTGGGGGTTGTA	AGAAA	TAACT	81	CCTGTATCC	AACTAACGC	TACCGGAGT	GTGAAGTAG
sp-12533	ACTCGTCTGAGCGAGTATAAACGACATTAAGCTCAGAGCGGCAGGGTTCTTCCCTGCGTTGTA	AGAAA	TAACT	73	GATGTCCTG	CTTGTCGTT	AGGCACACA	GACTATCAC
sp-12541	ACTCGTCTGAGCGAGTATAAACGGTGTTAAGCTCAGAGCGTCCCGGCAGCTGCCGGGGGTCACA	AGAAA	TTAAT	74	CGTTGCGTT	CTCTCTAGG	GATAACGCG	GAGACCTAA
sp-12542	ACTCGTCTGAGCGAGTATAAACGGTGTTAAGCTCAGAGCGTCTTGGTCGGTATTACCGGCTGGGGGTCACA	AGAAA	TTAAT	81	CATCCTAGC	CATCGCTAG	GCGTCTACT	CAATATCCG
sp-12543	ACTCGTCTGAGCGAGTATAAACGGTGTTAAGCTCAGAGCGGCAGGGTTCTTCCCTGCGTCACA	AGAAA	TTAAT	73	GGCCTTAGA	GACTCATCT	AACTGCACG	GGATGTCAG
sp-12551	ACTCGTCTGAGCGAGTATAAACGTTATTAAGCTCAGAGCGTCCCGGCAGCTGCCGGGGGTTAAC	AGAAA	TAATA	74	CAGTCGAGT	GATGTCAGT	GCCTCTTTG	TACGGAACT
sp-12552	ACTCGTCTGAGCGAGTATAAACGTTATTAAGCTCAGAGCGTCTTGGTCGGTATTACCGGCTGGGGGTTAAC	AGAAA	TAATA	81	GATCGGTGA	AAGTGGGGA	GACTCCGTA	AGCCTTCGT
sp-12553	ACTCGTCTGAGCGAGTATAAACGTTATTAAGCTCAGAGCGGCAGGGTTCTTCCCTGCGTTAAC	AGAAA	TAATA	73	ACTCGTAGA	ATAAAGCGC	ATCTTGACC	TCTTCCAGA
sp-13111	ACTCGTCATAGCGAGTATAAATAGTAATTAAGCTATGAGCGTCCCGGCAGCTGCCGGGGGTTTAG	AGAAA	CAGTT	75	CTACCACAC	GACAGGGTA	GTGTTGGTC	CTTAAGTGC
sp-13112	ACTCGTCATAGCGAGTATAAATAGTAATTAAGCTATGAGCGTCTTGGTCGGTATTACCGGCTGGGGGTTTAG	AGAAA	CAGTT	82	ATGATGTCC	TGTACCTGG	AGCCTCAAT	TACGACCCT
sp-13113	ACTCGTCATAGCGAGTATAAATAGTAATTAAGCTATGAGCGGCAGGGTTCTTCCCTGCGTTTAG	AGAAA	CAGTT	74	GTTCAGTAC	CAGAATCTC	TAGGACCTG	CTCTTGTGA
sp-13121	ACTCGTCATAGCGAGTATAAATAGGCTTTAAGCTATGAGCGTCCCGGCAGCTGCCGGGGGTAGTC	AGAAA	AAAAA	75	CAACCGGTA	ATCCGAACT	CAGGATTCG	GATACCAGG
sp-13122	ACTCGTCATAGCGAGTATAAATAGGCTTTAAGCTATGAGCGTCTTGGTCGGTATTACCGGCTGGGGGTAGTC	AGAAA	AAAAA	82	TAGTACCAC	ACGGTGATG	CAGATAGCC	TCATTGCAG
sp-13123	ACTCGTCATAGCGAGTATAAATAGGCTTTAAGCTATGAGCGGCAGGGTTCTTCCCTGCGTAGTC	AGAAA	AAAAA	74	TCGTCTATG	ACTATGGCT	GATCCAAGT	AGAGGATCA
sp-13131	ACTCGTCATAGCGAGTATAAATAGACATTAAGCTATGAGCGTCCCGGCAGCTGCCGGGGGTTGTA	AGAAA	TAACT	75	CGACATTAG	TGAAAGGGC	ATCTCGCAC	CTGTTCCTG
sp-13132	ACTCGTCATAGCGAGTATAAATAGACATTAAGCTATGAGCGTCTTGGTCGGTATTACCGGCTGGGGGTTGTA	AGAAA	TAACT	82	TACTTGTCG	ATGAACGAC	AGCGATGTA	CCACATCTG
sp-13133	ACTCGTCATAGCGAGTATAAATAGACATTAAGCTATGAGCGGCAGGGTTCTTCCCTGCGTTGTA	AGAAA	TAACT	74	TTCGATCGA	ACGTCAATG	AGAGGGAAC	TTGGTAGCT
sp-13141	ACTCGTCATAGCGAGTATAAATAGGTGTTAAGCTATGAGCGTCCCGGCAGCTGCCGGGGGTCACA	AGAAA	TTAAT	75	TGTCTCACG	AAGGGTAGG	TGTAAGGGT	GATAATGCC
sp-13142	ACTCGTCATAGCGAGTATAAATAGGTGTTAAGCTATGAGCGTCTTGGTCGGTATTACCGGCTGGGGGTCACA	AGAAA	TTAAT	82	CCCATCAAA	CGAAAGCTA	AGGCGTAGA	GCCATCCAA
sp-13143	ACTCGTCATAGCGAGTATAAATAGGTGTTAAGCTATGAGCGGCAGGGTTCTTCCCTGCGTCACA	AGAAA	TTAAT	74	GGTTAAGGG	GGCGGTATT	TACGAACCC	GCAGAAACT
sp-13151	ACTCGTCATAGCGAGTATAAATAGTTATTAAGCTATGAGCGTCCCGGCAGCTGCCGGGGGTTAAC	AGAAA	TAATA	75	CAAGTTGGA	ATTTGTGGC	GCTTGTGCA	ACTGGATCC
sp-13152	ACTCGTCATAGCGAGTATAAATAGTTATTAAGCTATGAGCGTCTTGGTCGGTATTACCGGCTGGGGGTTAAC	AGAAA	TAATA	82	ATCTTTGCC	CTCAGACAC	GTGTCAGGA	TAAGGCCCA
sp-13153	ACTCGTCATAGCGAGTATAAATAGTTATTAAGCTATGAGCGGCAGGGTTCTTCCCTGCGTTAAC	AGAAA	TAATA	74	TCTATCTGC	GGACCTCAA	CTTGGTTAC	GATAGCTCT
sp-13211	ACTCGTCATAGCGAGTATAAATAGGTAATTAAGCTATGAGCGTCCCGGCAGCTGCCGGGGGTTTAG	AGAAA	CAGTT	76	GTACAGGTG	CTAGGAGCT	GTCTGCTCT	CAGACCAAG
sp-13212	ACTCGTCATAGCGAGTATAAATAGGTAATTAAGCTATGAGCGTCTTGGTCGGTATTACCGGCTGGGGGTTTAG	AGAAA	CAGTT	83	CAGTGTAGT	CCAGTTTGT	GTTACGTCC	GTTACGCGT
sp-13213	ACTCGTCATAGCGAGTATAAATAGGTAATTAAGCTATGAGCGGCAGGGTTCTTCCCTGCGTTTAG	AGAAA	CAGTT	75	ACAAGTTCC	CCACATTGT	GAAAGAGAC	GTAGCGACT
sp-13221	ACTCGTCATAGCGAGTATAAATAGGGCTTTAAGCTATGAGCGTCCCGGCAGCTGCCGGGGGTAGTC	AGAAA	AAAAA	76	CTGTGGAGA	AAGCTTCAC	ATAGCCTGA	AAGTGGGAC
sp-13222	ACTCGTCATAGCGAGTATAAATAGGGCTTTAAGCTATGAGCGTCTTGGTCGGTATTACCGGCTGGGGGTAGTC	AGAAA	AAAAA	83	GTTCGGGTA	TGTTCACCG	TGGTTTACG	CAACCCATT
sp-13223	ACTCGTCATAGCGAGTATAAATAGGGCTTTAAGCTATGAGCGGCAGGGTTCTTCCCTGCGTAGTC	AGAAA	AAAAA	75	GCGCTATGT	TAGGTTCCG	CACTCGAAT	GTTGACTGT
sp-13231	ACTCGTCATAGCGAGTATAAATAGGACATTAAGCTATGAGCGTCCCGGCAGCTGCCGGGGGTTGTA	AGAAA	TAACT	76	GTATTAGGC	CGTATGAGG	CGCTGGAAA	TCCTTCGTG
sp-13232	ACTCGTCATAGCGAGTATAAATAGGACATTAAGCTATGAGCGTCTTGGTCGGTATTACCGGCTGGGGGTTGTA	AGAAA	TAACT	83	TCGTCGCTA	GGTGGATCT	GCGCCTATA	TCCTCACTT
sp-13233	ACTCGTCATAGCGAGTATAAATAGGACATTAAGCTATGAGCGGCAGGGTTCTTCCCTGCGTTGTA	AGAAA	TAACT	75	TCACTCACA	CTTGACCAT	ACATGCAGA	GCTGTTGGA
sp-13241	ACTCGTCATAGCGAGTATAAATAGGGTGTTAAGCTATGAGCGTCCCGGCAGCTGCCGGGGGTCACA	AGAAA	TTAAT	76	CGTTGATCT	TAGCGCTAC	TTCCGAAGA	AGACCCTGT
sp-13242	ACTCGTCATAGCGAGTATAAATAGGGTGTTAAGCTATGAGCGTCTTGGTCGGTATTACCGGCTGGGGGTCACA	AGAAA	TTAAT	83	CATAGTAGC	CACTTTGAG	CGCTTTTTC	ATATTCCGC
sp-13243	ACTCGTCATAGCGAGTATAAATAGGGTGTTAAGCTATGAGCGGCAGGGTTCTTCCCTGCGTCACA	AGAAA	TTAAT	75	CGAAGCTAA	CGTTAGGAT	TAGGGTGTT	AGATCTTGC
sp-13251	ACTCGTCATAGCGAGTATAAATAGGTTATTAAGCTATGAGCGTCCCGGCAGCTGCCGGGGGTTAAC	AGAAA	TAATA	76	GACGGACAT	ACAAGACCG	TACAAACGC	ACCAGATGT
sp-13252	ACTCGTCATAGCGAGTATAAATAGGTTATTAAGCTATGAGCGTCTTGGTCGGTATTACCGGCTGGGGGTTAAC	AGAAA	TAATA	83	TACTTCCTG	TGCCTAGCT	ATACCTGGT	CTTTCCATC
sp-13253	ACTCGTCATAGCGAGTATAAATAGGTTATTAAGCTATGAGCGGCAGGGTTCTTCCCTGCGTTAAC	AGAAA	TAATA	75	AACTTTCGG	ACTCGAACT	TCAGACGTG	CACTCGTCA
sp-13311	ACTCGTCATAGCGAGTGTAAATAGTAATTAAGCTATGAGCGTCCCGGCAGCTGCCGGGGGTTTAG	AGAAA	CAGTT	75	AGTGGCACT	TCACCCATG	CGCTCTGAA	TAAAGCCCG
sp-13312	ACTCGTCATAGCGAGTGTAAATAGTAATTAAGCTATGAGCGTCTTGGTCGGTATTACCGGCTGGGGGTTTAG	AGAAA	CAGTT	82	AAGGACAAG	GTTGTCACC	TATACGCAC	TGTCAGCTT
sp-13313	ACTCGTCATAGCGAGTGTAAATAGTAATTAAGCTATGAGCGGCAGGGTTCTTCCCTGCGTTTAG	AGAAA	CAGTT	74	CCCAACTTT	CTATGAGAC	GCTTCAGAG	TACTGTTCG
sp-13321	ACTCGTCATAGCGAGTGTAAATAGGCTTTAAGCTATGAGCGTCCCGGCAGCTGCCGGGGGTAGTC	AGAAA	AAAAA	75	CTTATGGCG	TGGGAACTG	TTCGGACTT	GAACCGCTT
sp-13322	ACTCGTCATAGCGAGTGTAAATAGGCTTTAAGCTATGAGCGTCTTGGTCGGTATTACCGGCTGGGGGTAGTC	AGAAA	AAAAA	82	TATTGTGCC	CTATTGACG	GTAGTTGCC	ATGAGGGAA
sp-13323	ACTCGTCATAGCGAGTGTAAATAGGCTTTAAGCTATGAGCGGCAGGGTTCTTCCCTGCGTAGTC	AGAAA	AAAAA	74	CGTGACGAA	TAACCGGTC	AATGCCACG	GATAGTGGA
sp-13331	ACTCGTCATAGCGAGTGTAAATAGACATTAAGCTATGAGCGTCCCGGCAGCTGCCGGGGGTTGTA	AGAAA	TAACT	75	TCATGGTGG	GCATTCCAA	TCTTGCGTG	TACCGGGTA
sp-13332	ACTCGTCATAGCGAGTGTAAATAGACATTAAGCTATGAGCGTCTTGGTCGGTATTACCGGCTGGGGGTTGTA	AGAAA	TAACT	82	AGCTCTCGA	CTACAAGGA	GATATCGGA	GAACGTCAA
sp-13333	ACTCGTCATAGCGAGTGTAAATAGACATTAAGCTATGAGCGGCAGGGTTCTTCCCTGCGTTGTA	AGAAA	TAACT	74	GATAGGTGT	GGTTCCTGA	TAGTGTACG	AGCCAGTAA
sp-13341	ACTCGTCATAGCGAGTGTAAATAGGTGTTAAGCTATGAGCGTCCCGGCAGCTGCCGGGGGTCACA	AGAAA	TTAAT	75	TACGGGTAG	GCATACTGG	AGAGTGACC	CAAGATCAC
sp-13342	ACTCGTCATAGCGAGTGTAAATAGGTGTTAAGCTATGAGCGTCTTGGTCGGTATTACCGGCTGGGGGTCACA	AGAAA	TTAAT	82	GGAAGCTTT	TCCCATGTG	ACTAAGCGG	TGGGCTTTC
sp-13343	ACTCGTCATAGCGAGTGTAAATAGGTGTTAAGCTATGAGCGGCAGGGTTCTTCCCTGCGTCACA	AGAAA	TTAAT	74	ACTTCCGCA	TTCATCCTG	GATTGGGTA	GTTGAGCCT
sp-13351	ACTCGTCATAGCGAGTGTAAATAGTTATTAAGCTATGAGCGTCCCGGCAGCTGCCGGGGGTTAAC	AGAAA	TAATA	75	TCTAATCCC	ATTTGGGGG	GTAGAGAAG	AGATGTCCT
sp-13352	ACTCGTCATAGCGAGTGTAAATAGTTATTAAGCTATGAGCGTCTTGGTCGGTATTACCGGCTGGGGGTTAAC	AGAAA	TAATA	82	TCATGGAAC	CCATAGGTA	TGTTGGAGC	ACAGTGACT
sp-13353	ACTCGTCATAGCGAGTGTAAATAGTTATTAAGCTATGAGCGGCAGGGTTCTTCCCTGCGTTAAC	AGAAA	TAATA	74	GGAGAAGAT	TGTCATAGC	GGACTCTTC	CCGTGGTTT
sp-13411	ACTCGTCATAGCGAGTTTAAATAGTAATTAAGCTATGAGCGTCCCGGCAGCTGCCGGGGGTTTAG	AGAAA	CAGTT	75	ATAGTCCGG	GCACAATCG	CAACTTCCG	ATGGCCGTA
sp-13412	ACTCGTCATAGCGAGTTTAAATAGTAATTAAGCTATGAGCGTCTTGGTCGGTATTACCGGCTGGGGGTTTAG	AGAAA	CAGTT	82	GTAAACTGG	TCGTCATTG	CCATGATAC	ACAGAGCGA
sp-13413	ACTCGTCATAGCGAGTTTAAATAGTAATTAAGCTATGAGCGGCAGGGTTCTTCCCTGCGTTTAG	AGAAA	CAGTT	74	GCTCGATAC	ACTCCCATC	ACTGACTCG	GTGATAGCC
sp-13421	ACTCGTCATAGCGAGTTTAAATAGGCTTTAAGCTATGAGCGTCCCGGCAGCTGCCGGGGGTAGTC	AGAAA	AAAAA	75	GACTATACC	TAGTACTCC	CCCACAAGT	CTTTCAGTG
sp-13422	ACTCGTCATAGCGAGTTTAAATAGGCTTTAAGCTATGAGCGTCTTGGTCGGTATTACCGGCTGGGGGTAGTC	AGAAA	AAAAA	82	AAGGACGTT	ATGGCTGCT	TTGGATAGG	CTAGGAGAA
sp-13423	ACTCGTCATAGCGAGTTTAAATAGGCTTTAAGCTATGAGCGGCAGGGTTCTTCCCTGCGTAGTC	AGAAA	AAAAA	74	ACACTTGCC	ACCGGTGAT	TACGGCAAA	TTTCAGTGG
sp-13431	ACTCGTCATAGCGAGTTTAAATAGACATTAAGCTATGAGCGTCCCGGCAGCTGCCGGGGGTTGTA	AGAAA	TAACT	75	GGGTATCGT	CTTTCTCAC	CCTTGTGCT	TTTCCGCAG
sp-13432	ACTCGTCATAGCGAGTTTAAATAGACATTAAGCTATGAGCGTCTTGGTCGGTATTACCGGCTGGGGGTTGTA	AGAAA	TAACT	82	ACTTGCGGA	ATGAGAGGA	TGACCTTCC	GGACTGGTA
sp-13433	ACTCGTCATAGCGAGTTTAAATAGACATTAAGCTATGAGCGGCAGGGTTCTTCCCTGCGTTGTA	AGAAA	TAACT	74	CGCCTAAAC	ACAGCACAG	GAAAACTCC	CTGGAAGAA
sp-13441	ACTCGTCATAGCGAGTTTAAATAGGTGTTAAGCTATGAGCGTCCCGGCAGCTGCCGGGGGTCACA	AGAAA	TTAAT	75	ATCGGCTGA	ACTCTACAG	AATCATGCG	GCTGATCAA
sp-13442	ACTCGTCATAGCGAGTTTAAATAGGTGTTAAGCTATGAGCGTCTTGGTCGGTATTACCGGCTGGGGGTCACA	AGAAA	TTAAT	82	TATGATCCC	TTCCTTACC	CCACGAAAT	CGTATCCTG
sp-13443	ACTCGTCATAGCGAGTTTAAATAGGTGTTAAGCTATGAGCGGCAGGGTTCTTCCCTGCGTCACA	AGAAA	TTAAT	74	CAAAGTGGC	CTGTGATAC	CGAGTGTCA	GCGTGGTTA
sp-13451	ACTCGTCATAGCGAGTTTAAATAGTTATTAAGCTATGAGCGTCCCGGCAGCTGCCGGGGGTTAAC	AGAAA	TAATA	75	CAGGGGTTA	TCCTTCCAC	ACTCTAACG	TTAAGGGGT
sp-13452	ACTCGTCATAGCGAGTTTAAATAGTTATTAAGCTATGAGCGTCTTGGTCGGTATTACCGGCTGGGGGTTAAC	AGAAA	TAATA	82	TAAGGATGG	GGGCTAATC	CGCCATATC	TGTACCAAG
sp-13453	ACTCGTCATAGCGAGTTTAAATAGTTATTAAGCTATGAGCGGCAGGGTTCTTCCCTGCGTTAAC	AGAAA	TAATA	74	GTCGGATTG	CCTGATAGC	AGTATCCCA	ACTTCCTTG
sp-13511	ACTCGTCATAGCGAGTATAAACGTAATTAAGCTATGAGCGTCCCGGCAGCTGCCGGGGGTTTAG	AGAAA	CAGTT	74	TCGGAAGAA	GAGCTTGAT	ATAGGAGAC	ACAGCACTT
sp-13512	ACTCGTCATAGCGAGTATAAACGTAATTAAGCTATGAGCGTCTTGGTCGGTATTACCGGCTGGGGGTTTAG	AGAAA	CAGTT	81	GCTCCTAGA	GGTATTTGG	ACTGGGAGT	GTGAGTACG
sp-13513	ACTCGTCATAGCGAGTATAAACGTAATTAAGCTATGAGCGGCAGGGTTCTTCCCTGCGTTTAG	AGAAA	CAGTT	73	ACCCTAGCT	ACGGCAAGA	CGCTATCCT	AAGCGACCA
sp-13521	ACTCGTCATAGCGAGTATAAACGGCTTTAAGCTATGAGCGTCCCGGCAGCTGCCGGGGGTAGTC	AGAAA	AAAAA	74	CGACCAGAA	GATACAACG	TGTGCACGT	ATGAAACGC
sp-13522	ACTCGTCATAGCGAGTATAAACGGCTTTAAGCTATGAGCGTCTTGGTCGGTATTACCGGCTGGGGGTAGTC	AGAAA	AAAAA	81	GAAAGCTCA	GCTTACTCT	CTAGGCCAT	TATCCCCAA
sp-13523	ACTCGTCATAGCGAGTATAAACGGCTTTAAGCTATGAGCGGCAGGGTTCTTCCCTGCGTAGTC	AGAAA	AAAAA	73	AACCTAACG	CGTATTGGT	TATCCCGGT	ATGACCTGC
sp-13531	ACTCGTCATAGCGAGTATAAACGACATTAAGCTATGAGCGTCCCGGCAGCTGCCGGGGGTTGTA	AGAAA	TAACT	74	TGCATGAAC	ATGCAGTTC	CTAGACCTC	GACAGACAA
sp-13532	ACTCGTCATAGCGAGTATAAACGACATTAAGCTATGAGCGTCTTGGTCGGTATTACCGGCTGGGGGTTGTA	AGAAA	TAACT	81	ACTAGCCAT	GCGTGATTC	TCTCCGCTA	AGGACGTTA
sp-13533	ACTCGTCATAGCGAGTATAAACGACATTAAGCTATGAGCGGCAGGGTTCTTCCCTGCGTTGTA	AGAAA	TAACT	73	TTAGGACAC	GTGGCGAAA	GGTAGCTAT	AGGTTCCGA
sp-13541	ACTCGTCATAGCGAGTATAAACGGTGTTAAGCTATGAGCGTCCCGGCAGCTGCCGGGGGTCACA	AGAAA	TTAAT	74	CTGAATGCA	GTAGTGCAG	CTCCATTAG	ACCCGGAAT
sp-13542	ACTCGTCATAGCGAGTATAAACGGTGTTAAGCTATGAGCGTCTTGGTCGGTATTACCGGCTGGGGGTCACA	AGAAA	TTAAT	81	GACTTCGTT	TCAGCACAC	TACCAGCAT	TGTCAGAGT
sp-13543	ACTCGTCATAGCGAGTATAAACGGTGTTAAGCTATGAGCGGCAGGGTTCTTCCCTGCGTCACA	AGAAA	TTAAT	73	TCGTACCTT	CAACGACGT	ACCTCCTGA	GTCTGCAAA
sp-13551	ACTCGTCATAGCGAGTATAAACGTTATTAAGCTATGAGCGTCCCGGCAGCTGCCGGGGGTTAAC	AGAAA	TAATA	74	GCTTACCAC	AGACATCAG	ATCATGGCC	ACGTGGGTA
sp-13552	ACTCGTCATAGCGAGTATAAACGTTATTAAGCTATGAGCGTCTTGGTCGGTATTACCGGCTGGGGGTTAAC	AGAAA	TAATA	81	GGCATAGAC	TGGCTTTGG	CAGCTTCTA	GTACAGTTC
sp-13553	ACTCGTCATAGCGAGTATAAACGTTATTAAGCTATGAGCGGCAGGGTTCTTCCCTGCGTTAAC	AGAAA	TAATA	73	AGTATGGCG	TGGCGTTTG	AGTATCGGG	TCCGTGAGA
sp-14111	ACTCGACTAAGCGAGTATAAATAGTAATTAGGCTTAGAGCGTCCCGGCAGCTGCCGGGGGTTTAG	AGAAA	CAGTT	75	GCCTTCTAC	ACGTGTACT	CAAGACAAC	ACCGTACAC
sp-14112	ACTCGACTAAGCGAGTATAAATAGTAATTAGGCTTAGAGCGTCTTGGTCGGTATTACCGGCTGGGGGTTTAG	AGAAA	CAGTT	82	TTCTAGTGG	ACGAAAGGC	CAGAAATGC	ACTACAGCA
sp-14113	ACTCGACTAAGCGAGTATAAATAGTAATTAGGCTTAGAGCGGCAGGGTTCTTCCCTGCGTTTAG	AGAAA	CAGTT	74	TGTAGAGTC	TGGGTTCTC	AGAAACCGC	CGTGTGATA
sp-14121	ACTCGACTAAGCGAGTATAAATAGGCTTTAGGCTTAGAGCGTCCCGGCAGCTGCCGGGGGTAGTC	AGAAA	AAAAA	75	TGACCTGTA	CTGCTACTA	CCACATAGA	GGCTAAGTA
sp-14122	ACTCGACTAAGCGAGTATAAATAGGCTTTAGGCTTAGAGCGTCTTGGTCGGTATTACCGGCTGGGGGTAGTC	AGAAA	AAAAA	82	GACTGACTC	CCATTCCAC	TCTTAACCG	GGTAGCATT
sp-14123	ACTCGACTAAGCGAGTATAAATAGGCTTTAGGCTTAGAGCGGCAGGGTTCTTCCCTGCGTAGTC	AGAAA	AAAAA	74	CATGCTCTG	TACCTCTAG	GAAACGCTA	TTTGGCGTT
sp-14131	ACTCGACTAAGCGAGTATAAATAGACATTAGGCTTAGAGCGTCCCGGCAGCTGCCGGGGGTTGTA	AGAAA	TAACT	75	GACATCCTA	GTTACCAGA	ACGGACCTT	AGGACGTCT
sp-14132	ACTCGACTAAGCGAGTATAAATAGACATTAGGCTTAGAGCGTCTTGGTCGGTATTACCGGCTGGGGGTTGTA	AGAAA	TAACT	82	GGGTAACTA	CATTGAAGG	TAGTTGCTC	CAAGGTACT
sp-14133	ACTCGACTAAGCGAGTATAAATAGACATTAGGCTTAGAGCGGCAGGGTTCTTCCCTGCGTTGTA	AGAAA	TAACT	74	CAAAGATCG	TGAAACGTG	ATGACCCAT	AGGAGGTAG
sp-14141	ACTCGACTAAGCGAGTATAAATAGGTGTTAGGCTTAGAGCGTCCCGGCAGCTGCCGGGGGTCACA	AGAAA	TTAAT	75	TATGTCCGA	GGACAAGTG	GGTTCTTCT	CTGGACTAT
sp-14142	ACTCGACTAAGCGAGTATAAATAGGTGTTAGGCTTAGAGCGTCTTGGTCGGTATTACCGGCTGGGGGTCACA	AGAAA	TTAAT	82	TGGTCAGTT	CGTCTAAGG	ACCAAGGAG	ATGCGAAAG
sp-14143	ACTCGACTAAGCGAGTATAAATAGGTGTTAGGCTTAGAGCGGCAGGGTTCTTCCCTGCGTCACA	AGAAA	TTAAT	74	ACACCTCGT	TTGTGGAAC	GTTTCGAGG	ACTGGCGTA
sp-14151	ACTCGACTAAGCGAGTATAAATAGTTATTAGGCTTAGAGCGTCCCGGCAGCTGCCGGGGGTTAAC	AGAAA	TAATA	75	CGACCATAC	GCTTAGTAC	TCACTAGGG	ATATGGACC
sp-14152	ACTCGACTAAGCGAGTATAAATAGTTATTAGGCTTAGAGCGTCTTGGTCGGTATTACCGGCTGGGGGTTAAC	AGAAA	TAATA	82	CGTGAAGCA	GCATCAATC	TCTGTTCGC	TGGCTTAGC
sp-14153	ACTCGACTAAGCGAGTATAAATAGTTATTAGGCTTAGAGCGGCAGGGTTCTTCCCTGCGTTAAC	AGAAA	TAATA	74	GAGAGGGAA	CGGTTATTC	CAGGACACA	GGAAGAGAG
sp-14211	ACTCGACTAAGCGAGTATAAATAGGTAATTAGGCTTAGAGCGTCCCGGCAGCTGCCGGGGGTTTAG	AGAAA	CAGTT	76	CATGGGAAT	GACGATCCT	CTCACTACT	CTGCAGCTT
sp-14212	ACTCGACTAAGCGAGTATAAATAGGTAATTAGGCTTAGAGCGTCTTGGTCGGTATTACCGGCTGGGGGTTTAG	AGAAA	CAGTT	83	TGCGTGTTT	GGCTTTTAC	TAAGGTCCT	GAATGCTCT
sp-14213	ACTCGACTAAGCGAGTATAAATAGGTAATTAGGCTTAGAGCGGCAGGGTTCTTCCCTGCGTTTAG	AGAAA	CAGTT	75	GACCTCCTT	GTCTGGTGT	GTACTATGC	TCGGCGTAA
sp-14221	ACTCGACTAAGCGAGTATAAATAGGGCTTTAGGCTTAGAGCGTCCCGGCAGCTGCCGGGGGTAGTC	AGAAA	AAAAA	76	CGTAGTTGT	ACTACACAC	ATGCAGCCT	GTAATCCTC
sp-14222	ACTCGACTAAGCGAGTATAAATAGGGCTTTAGGCTTAGAGCGTCTTGGTCGGTATTACCGGCTGGGGGTAGTC	AGAAA	AAAAA	83	GGTTCGTAC	ATTAGGGTG	GAGTTAGTC	CACCTACCA
sp-14223	ACTCGACTAAGCGAGTATAAATAGGGCTTTAGGCTTAGAGCGGCAGGGTTCTTCCCTGCGTAGTC	AGAAA	AAAAA	75	CCTTCAGTA	CCTGTGTAT	CGCCAAGTT	CTCCTTCTA
sp-14231	ACTCGACTAAGCGAGTATAAATAGGACATTAGGCTTAGAGCGTCCCGGCAGCTGCCGGGGGTTGTA	AGAAA	TAACT	76	AAGATCAGC	ACCTTTCCT	TCCGTTTGC	CGACGTTTT
sp-14232	ACTCGACTAAGCGAGTATAAATAGGACATTAGGCTTAGAGCGTCTTGGTCGGTATTACCGGCTGGGGGTTGTA	AGAAA	TAACT	83	ACTTACGGG	AAGTGCTCG	GACCACTAC	CGAACTGAG
sp-14233	ACTCGACTAAGCGAGTATAAATAGGACATTAGGCTTAGAGCGGCAGGGTTCTTCCCTGCGTTGTA	AGAAA	TAACT	75	AAGGGATGG	TAGCCTCAA	ATCAGCAGT	AGTTGCCTG
sp-14241	ACTCGACTAAGCGAGTATAAATAGGGTGTTAGGCTTAGAGCGTCCCGGCAGCTGCCGGGGGTCACA	AGAAA	TTAAT	76	TGAGCAGCT	ATACAGCAC	TGTCACTGG	CCATTAACG
sp-14242	ACTCGACTAAGCGAGTATAAATAGGGTGTTAGGCTTAGAGCGTCTTGGTCGGTATTACCGGCTGGGGGTCACA	AGAAA	TTAAT	83	AAATTCGCG	CATAGCACC	GTTCCTCAA	AGCCTAGTA
sp-14243	ACTCGACTAAGCGAGTATAAATAGGGTGTTAGGCTTAGAGCGGCAGGGTTCTTCCCTGCGTCACA	AGAAA	TTAAT	75	CATCCACGA	AGGCAAAAG	GAACGGCTA	GACGTACCA
sp-14251	ACTCGACTAAGCGAGTATAAATAGGTTATTAGGCTTAGAGCGTCCCGGCAGCTGCCGGGGGTTAAC	AGAAA	TAATA	76	TCCGTGTAA	CTGTACGAC	CCTACTCAT	TATCCAGAC
sp-14252	ACTCGACTAAGCGAGTATAAATAGGTTATTAGGCTTAGAGCGTCTTGGTCGGTATTACCGGCTGGGGGTTAAC	AGAAA	TAATA	83	GGCTTGGAA	TTTCAGCCT	TCTGGCTCT	CGGGAAAGA
sp-14253	ACTCGACTAAGCGAGTATAAATAGGTTATTAGGCTTAGAGCGGCAGGGTTCTTCCCTGCGTTAAC	AGAAA	TAATA	75	TTTCTGCTG	CTTCGCATC	CTCCCTCAT	TCTAGCAAG
sp-14311	ACTCGACTAAGCGAGTGTAAATAGTAATTAGGCTTAGAGCGTCCCGGCAGCTGCCGGGGGTTTAG	AGAAA	CAGTT	75	CGTAAAGGA	CCCATCATC	AAACCACGA	CATTGCACA
sp-14312	ACTCGACTAAGCGAGTGTAAATAGTAATTAGGCTTAGAGCGTCTTGGTCGGTATTACCGGCTGGGGGTTTAG	AGAAA	CAGTT	82	TACAAGTCC	CAAAAGCCT	TGCACTTAC	ACGATGTGT
sp-14313	ACTCGACTAAGCGAGTGTAAATAGTAATTAGGCTTAGAGCGGCAGGGTTCTTCCCTGCGTTTAG	AGAAA	CAGTT	74	GGACTTCGT	ACGTCATGG	ATCGTTCGG	ACTCTGGCA
sp-14321	ACTCGACTAAGCGAGTGTAAATAGGCTTTAGGCTTAGAGCGTCCCGGCAGCTGCCGGGGGTAGTC	AGAAA	AAAAA	75	CCAGGACTA	GTGTGGTAA	CGAGGCATA	CATTTGTGG
sp-14322	ACTCGACTAAGCGAGTGTAAATAGGCTTTAGGCTTAGAGCGTCTTGGTCGGTATTACCGGCTGGGGGTAGTC	AGAAA	AAAAA	82	CACTCAGTT	CCACAGATA	CCGTTCTAG	CTTTCACCA
sp-14323	ACTCGACTAAGCGAGTGTAAATAGGCTTTAGGCTTAGAGCGGCAGGGTTCTTCCCTGCGTAGTC	AGAAA	AAAAA	74	GTGTCCACT	TCAAAGCGG	CACAGCAGT	TCGTATGCC
sp-14331	ACTCGACTAAGCGAGTGTAAATAGACATTAGGCTTAGAGCGTCCCGGCAGCTGCCGGGGGTTGTA	AGAAA	TAACT	75	AGCTCAGTG	CATACGAAC	TTCCCTGTG	TCATGTCAC
sp-14332	ACTCGACTAAGCGAGTGTAAATAGACATTAGGCTTAGAGCGTCTTGGTCGGTATTACCGGCTGGGGGTTGTA	AGAAA	TAACT	82	CCGCCATAA	GTTGAAAGG	GCATTCTCT	TCGGTACTC
sp-14333	ACTCGACTAAGCGAGTGTAAATAGACATTAGGCTTAGAGCGGCAGGGTTCTTCCCTGCGTTGTA	AGAAA	TAACT	74	TTGCCACTT	GTAGTTCGG	TATCTGAGC	AGTACACCC
sp-14341	ACTCGACTAAGCGAGTGTAAATAGGTGTTAGGCTTAGAGCGTCCCGGCAGCTGCCGGGGGTCACA	AGAAA	TTAAT	75	ACCATGGAA	TGGAGTAGG	CCCCATCAT	CTATCGGTA
sp-14342	ACTCGACTAAGCGAGTGTAAATAGGTGTTAGGCTTAGAGCGTCTTGGTCGGTATTACCGGCTGGGGGTCACA	AGAAA	TTAAT	82	CCTAGCGAT	TGAGGCAAC	TGACTCGAA	AGTGCCTCT
sp-14343	ACTCGACTAAGCGAGTGTAAATAGGTGTTAGGCTTAGAGCGGCAGGGTTCTTCCCTGCGTCACA	AGAAA	TTAAT	74	ACGCAAACC	GAGCGATAA	TCCATCTGT	CGTAAACCC
sp-14351	ACTCGACTAAGCGAGTGTAAATAGTTATTAGGCTTAGAGCGTCCCGGCAGCTGCCGGGGGTTAAC	AGAAA	TAATA	75	CTACCATGA	CGAAAGTAG	AGTGATGGG	CGGTGAAAG
sp-14352	ACTCGACTAAGCGAGTGTAAATAGTTATTAGGCTTAGAGCGTCTTGGTCGGTATTACCGGCTGGGGGTTAAC	AGAAA	TAATA	82	ATAACCCGG	GATTGGCGT	GTATGGAGC	GTAAGCTGT
sp-14353	ACTCGACTAAGCGAGTGTAAATAGTTATTAGGCTTAGAGCGGCAGGGTTCTTCCCTGCGTTAAC	AGAAA	TAATA	74	CTCTTAGCT	ACCACGAAC	CAAGCCGAT	TACACGTCT
sp-14411	ACTCGACTAAGCGAGTTTAAATAGTAATTAGGCTTAGAGCGTCCCGGCAGCTGCCGGGGGTTTAG	AGAAA	CAGTT	75	AATTGAGGG	CTTGGCTCA	CACCATTTC	AAACTTCGG
sp-14412	ACTCGACTAAGCGAGTTTAAATAGTAATTAGGCTTAGAGCGTCTTGGTCGGTATTACCGGCTGGGGGTTTAG	AGAAA	CAGTT	82	TGAGCGAAT	TCTGCTACG	TGTTTGTCG	AACTCAGGC
sp-14413	ACTCGACTAAGCGAGTTTAAATAGTAATTAGGCTTAGAGCGGCAGGGTTCTTCCCTGCGTTTAG	AGAAA	CAGTT	74	TCACCCGAA	CAGTCGTAC	CACATTCTG	TCTCTGTGG
sp-14421	ACTCGACTAAGCGAGTTTAAATAGGCTTTAGGCTTAGAGCGTCCCGGCAGCTGCCGGGGGTAGTC	AGAAA	AAAAA	75	ACTTGTCCA	TGGTGCAGA	AGCCTTTTC	AAGGGCGAA
sp-14422	ACTCGACTAAGCGAGTTTAAATAGGCTTTAGGCTTAGAGCGTCTTGGTCGGTATTACCGGCTGGGGGTAGTC	AGAAA	AAAAA	82	CCAGGAAGA	ATGGTCTCG	TGTGCTTGA	CGGTTATGG
sp-14423	ACTCGACTAAGCGAGTTTAAATAGGCTTTAGGCTTAGAGCGGCAGGGTTCTTCCCTGCGTAGTC	AGAAA	AAAAA	74	AAGACCGAC	ATAGCGGTC	CCTTAAGCG	AGGATTCGT
sp-14431	ACTCGACTAAGCGAGTTTAAATAGACATTAGGCTTAGAGCGTCCCGGCAGCTGCCGGGGGTTGTA	AGAAA	TAACT	75	CAGGCATAC	ACAGCATGA	CTGCCTTCT	ACTGTGGTT
sp-14432	ACTCGACTAAGCGAGTTTAAATAGACATTAGGCTTAGAGCGTCTTGGTCGGTATTACCGGCTGGGGGTTGTA	AGAAA	TAACT	82	ATTCACGCA	ACCGATTCG	AAGGAAGCC	TGCTCCAGT
sp-14433	ACTCGACTAAGCGAGTTTAAATAGACATTAGGCTTAGAGCGGCAGGGTTCTTCCCTGCGTTGTA	AGAAA	TAACT	74	TAGTTACCG	AATGCCCAG	ATGTCGTTC	CGAGTGTAT
sp-14441	ACTCGACTAAGCGAGTTTAAATAGGTGTTAGGCTTAGAGCGTCCCGGCAGCTGCCGGGGGTCACA	AGAAA	TTAAT	75	TCCAAGGCT	CCTTGCTGA	GCTAATGAC	GTTCGTCGA
sp-14442	ACTCGACTAAGCGAGTTTAAATAGGTGTTAGGCTTAGAGCGTCTTGGTCGGTATTACCGGCTGGGGGTCACA	AGAAA	TTAAT	82	ATTCGACCG	ATACGCACA	GGGGAAATT	TCCTGGCTA
sp-14443	ACTCGACTAAGCGAGTTTAAATAGGTGTTAGGCTTAGAGCGGCAGGGTTCTTCCCTGCGTCACA	AGAAA	TTAAT	74	ACCCCAAAT	TTTGCGGTC	GATTGCGGA	TCGCTGCAT
sp-14451	ACTCGACTAAGCGAGTTTAAATAGTTATTAGGCTTAGAGCGTCCCGGCAGCTGCCGGGGGTTAAC	AGAAA	TAATA	75	ACTGAAGCA	GCATAATGC	GACAATCTC	TCATAGCGT
sp-14452	ACTCGACTAAGCGAGTTTAAATAGTTATTAGGCTTAGAGCGTCTTGGTCGGTATTACCGGCTGGGGGTTAAC	AGAAA	TAATA	82	TGGCTGAAT	CACCGAAGA	CCACGCTAT	GTCCTGAAC
sp-14453	ACTCGACTAAGCGAGTTTAAATAGTTATTAGGCTTAGAGCGGCAGGGTTCTTCCCTGCGTTAAC	AGAAA	TAATA	74	TGCTACCTA	ACCAACATC	TAGAAGCGG	CAACTGTCA
sp-14511	ACTCGACTAAGCGAGTATAAACGTAATTAGGCTTAGAGCGTCCCGGCAGCTGCCGGGGGTTTAG	AGAAA	CAGTT	74	TCTTTCCCT	CTTGCAGCT	TAGGTTTGG	TTGGGGTGA
sp-14512	ACTCGACTAAGCGAGTATAAACGTAATTAGGCTTAGAGCGTCTTGGTCGGTATTACCGGCTGGGGGTTTAG	AGAAA	CAGTT	81	GTATCTTCG	ATACGAACG	TACCACAGG	GGGTCTTTA
sp-14513	ACTCGACTAAGCGAGTATAAACGTAATTAGGCTTAGAGCGGCAGGGTTCTTCCCTGCGTTTAG	AGAAA	CAGTT	73	ATGACGACC	GACGTCTAA	GTCTGAGAT	TCACAGTTG
sp-14521	ACTCGACTAAGCGAGTATAAACGGCTTTAGGCTTAGAGCGTCCCGGCAGCTGCCGGGGGTAGTC	AGAAA	AAAAA	74	TCCGTATGT	TGGACGGAA	TCGCAGTAG	CGGACATTG
sp-14522	ACTCGACTAAGCGAGTATAAACGGCTTTAGGCTTAGAGCGTCTTGGTCGGTATTACCGGCTGGGGGTAGTC	AGAAA	AAAAA	81	CCATTTCCC	GTACTCTGT	GCTAGCATC	GCAGTATTG
sp-14523	ACTCGACTAAGCGAGTATAAACGGCTTTAGGCTTAGAGCGGCAGGGTTCTTCCCTGCGTAGTC	AGAAA	AAAAA	73	GACATCTCT	ACTCATACG	GGCTTTGAT	ACTCTCGGT
sp-14531	ACTCGACTAAGCGAGTATAAACGACATTAGGCTTAGAGCGTCCCGGCAGCTGCCGGGGGTTGTA	AGAAA	TAACT	74	AGCCGAGTT	CCAGTAACA	ACTAACCCA	ATCGGGAAG
sp-14532	ACTCGACTAAGCGAGTATAAACGACATTAGGCTTAGAGCGTCTTGGTCGGTATTACCGGCTGGGGGTTGTA	AGAAA	TAACT	81	GCGTAAGTG	TCTGGGTAA	CTAGACTGG	GTCTACCTA
sp-14533	ACTCGACTAAGCGAGTATAAACGACATTAGGCTTAGAGCGGCAGGGTTCTTCCCTGCGTTGTA	AGAAA	TAACT	73	TGCTACGAG	TCGCACAGT	AAGTAGGGC	GCAAGGACA
sp-14541	ACTCGACTAAGCGAGTATAAACGGTGTTAGGCTTAGAGCGTCCCGGCAGCTGCCGGGGGTCACA	AGAAA	TTAAT	74	TCACAGCCT	GAGGATTCC	ATGGGTCAA	ATCCTCAAC
sp-14542	ACTCGACTAAGCGAGTATAAACGGTGTTAGGCTTAGAGCGTCTTGGTCGGTATTACCGGCTGGGGGTCACA	AGAAA	TTAAT	81	TCGAAGCAT	GGAGATAGG	GCATGGTCT	AGTACCATC
sp-14543	ACTCGACTAAGCGAGTATAAACGGTGTTAGGCTTAGAGCGGCAGGGTTCTTCCCTGCGTCACA	AGAAA	TTAAT	73	ATACTCGAG	GCATACGTG	GCATTACCC	TCACTTACG
sp-14551	ACTCGACTAAGCGAGTATAAACGTTATTAGGCTTAGAGCGTCCCGGCAGCTGCCGGGGGTTAAC	AGAAA	TAATA	74	ACCATTCCC	GTGCGTTTT	TAAAACCGG	ACGAGCAGT
sp-14552	ACTCGACTAAGCGAGTATAAACGTTATTAGGCTTAGAGCGTCTTGGTCGGTATTACCGGCTGGGGGTTAAC	AGAAA	TAATA	81	GTCATAGTG	TGTCACCAG	GAGAAGCTT	ACCTTGGTC
sp-14553	ACTCGACTAAGCGAGTATAAACGTTATTAGGCTTAGAGCGGCAGGGTTCTTCCCTGCGTTAAC	AGAAA	TAATA	73	AAGCTCGAA	AGGAAGACC	AAAGCAGCA	CAAGATGTC
sp-15111	ACTCGACTATGCGAGTATAAATAGTAATTAGGCATAGTGCGTCCCGGCAGCTGCCGGGGGTTTAG	AGAAA	CAGTT	75	TCATAGGCG	CACACGTAG	ACATCGGGA	CAATTCACG
sp-15112	ACTCGACTATGCGAGTATAAATAGTAATTAGGCATAGTGCGTCTTGGTCGGTATTACCGGCTGGGGGTTTAG	AGAAA	CAGTT	82	TATCCGAGA	GATCGAACG	ATATGAGGC	ATTGACGTC
sp-15113	ACTCGACTATGCGAGTATAAATAGTAATTAGGCATAGTGCGGCAGGGTTCTTCCCTGCGTTTAG	AGAAA	CAGTT	74	AACTATCCC	TTGAAACCG	CATCTCTGT	GCTGGATGA
sp-15121	ACTCGACTATGCGAGTATAAATAGGCTTTAGGCATAGTGCGTCCCGGCAGCTGCCGGGGGTAGTC	AGAAA	AAAAA	75	TTTACGGCG	GATCTACTC	AACCTTCGC	GTTGAGTAG
sp-15122	ACTCGACTATGCGAGTATAAATAGGCTTTAGGCATAGTGCGTCTTGGTCGGTATTACCGGCTGGGGGTAGTC	AGAAA	AAAAA	82	TGAAGCGTT	TGGGCTGAA	GTGTGACAA	GCCATCAAG
sp-15123	ACTCGACTATGCGAGTATAAATAGGCTTTAGGCATAGTGCGGCAGGGTTCTTCCCTGCGTAGTC	AGAAA	AAAAA	74	TAGGATCGG	AGGCGAGTA	ATGACTGCA	GACATTGGG
sp-15131	ACTCGACTATGCGAGTATAAATAGACATTAGGCATAGTGCGTCCCGGCAGCTGCCGGGGGTTGTA	AGAAA	TAACT	75	TCCGAAGCT	TAGGTCTTC	GATGAGGGT	AGTTCGGGA
sp-15132	ACTCGACTATGCGAGTATAAATAGACATTAGGCATAGTGCGTCTTGGTCGGTATTACCGGCTGGGGGTTGTA	AGAAA	TAACT	82	GACGTGGTT	GTCACTCAG	TGCGCAACT	CACTCAATC
sp-15133	ACTCGACTATGCGAGTATAAATAGACATTAGGCATAGTGCGGCAGGGTTCTTCCCTGCGTTGTA	AGAAA	TAACT	74	GCTTGAAGC	TTACCGTGT	GCGATTGCT	TACTCGCTA
sp-15141	ACTCGACTATGCGAGTATAAATAGGTGTTAGGCATAGTGCGTCCCGGCAGCTGCCGGGGGTCACA	AGAAA	TTAAT	75	ACGTCTCAT	GAGGACTAA	CGCTTTAGC	TCACCATGT
sp-15142	ACTCGACTATGCGAGTATAAATAGGTGTTAGGCATAGTGCGTCTTGGTCGGTATTACCGGCTGGGGGTCACA	AGAAA	TTAAT	82	CGCTCTTAG	CAAGCGTGT	AATCGCACT	CGTGTCCTT
sp-15143	ACTCGACTATGCGAGTATAAATAGGTGTTAGGCATAGTGCGGCAGGGTTCTTCCCTGCGTCACA	AGAAA	TTAAT	74	AGCGTTGAT	GGTTTGGCT	TCCCAGTGA	ATTGTCCAC
sp-15151	ACTCGACTATGCGAGTATAAATAGTTATTAGGCATAGTGCGTCCCGGCAGCTGCCGGGGGTTAAC	AGAAA	TAATA	75	TGGACGATA	CAGAGGCTT	TCCAGAGAA	AGAGCATGG
sp-15152	ACTCGACTATGCGAGTATAAATAGTTATTAGGCATAGTGCGTCTTGGTCGGTATTACCGGCTGGGGGTTAAC	AGAAA	TAATA	82	AGTCAAGCG	CTTGTCACT	CGGATCATC	TTTGGCTAC
sp-15153	ACTCGACTATGCGAGTATAAATAGTTATTAGGCATAGTGCGGCAGGGTTCTTCCCTGCGTTAAC	AGAAA	TAATA	74	ATGCACCGA	GCGTACATC	CTTGAGTCT	CGCTAGTCA
sp-15211	ACTCGACTATGCGAGTATAAATAGGTAATTAGGCATAGTGCGTCCCGGCAGCTGCCGGGGGTTTAG	AGAAA	CAGTT	76	TTAGCCACC	ATGTACTGG	GAGCAACTC	TGCATACGA
sp-15212	ACTCGACTATGCGAGTATAAATAGGTAATTAGGCATAGTGCGTCTTGGTCGGTATTACCGGCTGGGGGTTTAG	AGAAA	CAGTT	83	AGCATAAGG	CTCAGACTT	TAAACGGAC	CAGTAGTTG
sp-15213	ACTCGACTATGCGAGTATAAATAGGTAATTAGGCATAGTGCGGCAGGGTTCTTCCCTGCGTTTAG	AGAAA	CAGTT	75	TCGGCTTAC	CTGTCACAT	GGACTGAGA	CTAGTCTGA
sp-15221	ACTCGACTATGCGAGTATAAATAGGGCTTTAGGCATAGTGCGTCCCGGCAGCTGCCGGGGGTAGTC	AGAAA	AAAAA	76	AGACAGGGT	TCAGCGGTT	CAAAACCTG	ATGAAGGCA
sp-15222	ACTCGACTATGCGAGTATAAATAGGGCTTTAGGCATAGTGCGTCTTGGTCGGTATTACCGGCTGGGGGTAGTC	AGAAA	AAAAA	83	ACGACTTCC	TGGTAGTAG	ATACTGCGC	ACGTGCGAT
sp-15223	ACTCGACTATGCGAGTATAAATAGGGCTTTAGGCATAGTGCGGCAGGGTTCTTCCCTGCGTAGTC	AGAAA	AAAAA	75	ACACATTCG	GACTCATTG	CAGAGAGAG	ATTGGTGCA
sp-15231	ACTCGACTATGCGAGTATAAATAGGACATTAGGCATAGTGCGTCCCGGCAGCTGCCGGGGGTTGTA	AGAAA	TAACT	76	CGCCAATAA	CGTGCAAGT	CTTCGACGT	TAGTCAACG
sp-15232	ACTCGACTATGCGAGTATAAATAGGACATTAGGCATAGTGCGTCTTGGTCGGTATTACCGGCTGGGGGTTGTA	AGAAA	TAACT	83	GGTTTCCTC	ACAACGGTC	CTAGACGCT	CGGGAATGT
sp-15233	ACTCGACTATGCGAGTATAAATAGGACATTAGGCATAGTGCGGCAGGGTTCTTCCCTGCGTTGTA	AGAAA	TAACT	75	TCCCCATTG	TCTGTCCCA	CAATCTTCC	TCTGCTGGA
sp-15241	ACTCGACTATGCGAGTATAAATAGGGTGTTAGGCATAGTGCGTCCCGGCAGCTGCCGGGGGTCACA	AGAAA	TTAAT	76	CACTTGTGT	CACGACTCT	TCGTTTGGT	GTTAACCCT
sp-15242	ACTCGACTATGCGAGTATAAATAGGGTGTTAGGCATAGTGCGTCTTGGTCGGTATTACCGGCTGGGGGTCACA	AGAAA	TTAAT	83	CAAGAGCAA	GCGTTTGTG	TTCACCCTC	TTGCTCGTG
sp-15243	ACTCGACTATGCGAGTATAAATAGGGTGTTAGGCATAGTGCGGCAGGGTTCTTCCCTGCGTCACA	AGAAA	TTAAT	75	ACCCTCATT	CTGTGTTTG	ACCCCTATC	GAATCCCTT
sp-15251	ACTCGACTATGCGAGTATAAATAGGTTATTAGGCATAGTGCGTCCCGGCAGCTGCCGGGGGTTAAC	AGAAA	TAATA	76	CGCTAAATC	AGTTACCCA	ATTCGTGCT	CCCAAGAAC
sp-15252	ACTCGACTATGCGAGTATAAATAGGTTATTAGGCATAGTGCGTCTTGGTCGGTATTACCGGCTGGGGGTTAAC	AGAAA	TAATA	83	CTGACCTAT	TCATCCCAA	ATGTAGCAG	ACCCCGTAA
sp-15253	ACTCGACTATGCGAGTATAAATAGGTTATTAGGCATAGTGCGGCAGGGTTCTTCCCTGCGTTAAC	AGAAA	TAATA	75	GCACTGATA	TCAAGGTCA	CAAGTAGCT	TCTGGCGAA
sp-15311	ACTCGACTATGCGAGTGTAAATAGTAATTAGGCATAGTGCGTCCCGGCAGCTGCCGGGGGTTTAG	AGAAA	CAGTT	75	GGATGCACT	TTCGATACG	ACTCTGCCT	TGTGCTGAC
sp-15312	ACTCGACTATGCGAGTGTAAATAGTAATTAGGCATAGTGCGTCTTGGTCGGTATTACCGGCTGGGGGTTTAG	AGAAA	CAGTT	82	AAGATTGCC	ATATAGCCG	CCGTTGAAA	CACGGTGAT
sp-15313	ACTCGACTATGCGAGTGTAAATAGTAATTAGGCATAGTGCGGCAGGGTTCTTCCCTGCGTTTAG	AGAAA	CAGTT	74	ATGAGTTCG	TGTATCAGG	CGTACCGAA	TTCAAGGGT
sp-15321	ACTCGACTATGCGAGTGTAAATAGGCTTTAGGCATAGTGCGTCCCGGCAGCTGCCGGGGGTAGTC	AGAAA	AAAAA	75	GTTCAGAGG	TGACGTGTG	ACTGACACT	CTAGGTAGT
sp-15322	ACTCGACTATGCGAGTGTAAATAGGCTTTAGGCATAGTGCGTCTTGGTCGGTATTACCGGCTGGGGGTAGTC	AGAAA	AAAAA	82	TTGGCACTA	AGAACGAGC	CCAGTCTAC	GTAACGGTG
sp-15323	ACTCGACTATGCGAGTGTAAATAGGCTTTAGGCATAGTGCGGCAGGGTTCTTCCCTGCGTAGTC	AGAAA	AAAAA	74	GGTCTGCTA	ATGACGTGT	CAGCAGTGT	AAGTGAGCC
sp-15331	ACTCGACTATGCGAGTGTAAATAGACATTAGGCATAGTGCGTCCCGGCAGCTGCCGGGGGTTGTA	AGAAA	TAACT	75	CATACCAGA	CATGAGAGC	GCCTATCGT	CTCTCAAGC
sp-15332	ACTCGACTATGCGAGTGTAAATAGACATTAGGCATAGTGCGTCTTGGTCGGTATTACCGGCTGGGGGTTGTA	AGAAA	TAACT	82	TTTAGGCGC	GTGGGCTTA	GTTCTGAGC	GGATCTGTA
sp-15333	ACTCGACTATGCGAGTGTAAATAGACATTAGGCATAGTGCGGCAGGGTTCTTCCCTGCGTTGTA	AGAAA	TAACT	74	CAATGAACG	CAGATGTAG	GGTACTATC	GAAATCAGC
sp-15341	ACTCGACTATGCGAGTGTAAATAGGTGTTAGGCATAGTGCGTCCCGGCAGCTGCCGGGGGTCACA	AGAAA	TTAAT	75	CTGACCACT	AACGAAGGC	GGAGTCGTA	TGTCCAGCT
sp-15342	ACTCGACTATGCGAGTGTAAATAGGTGTTAGGCATAGTGCGTCTTGGTCGGTATTACCGGCTGGGGGTCACA	AGAAA	TTAAT	82	GGACACTAA	TGTGGGTGA	GGACTGTTT	GCTGTGACT
sp-15343	ACTCGACTATGCGAGTGTAAATAGGTGTTAGGCATAGTGCGGCAGGGTTCTTCCCTGCGTCACA	AGAAA	TTAAT	74	TTGCTATCC	GGAACAGGA	TCTTGATGC	GTGGGAAAT
sp-15351	ACTCGACTATGCGAGTGTAAATAGTTATTAGGCATAGTGCGTCCCGGCAGCTGCCGGGGGTTAAC	AGAAA	TAATA	75	GAGGTTTTG	GAGTCGCTT	GACCTTTAG	CGTTATGCA
sp-15352	ACTCGACTATGCGAGTGTAAATAGTTATTAGGCATAGTGCGTCTTGGTCGGTATTACCGGCTGGGGGTTAAC	AGAAA	TAATA	82	CTCGTTAGG	TGAAGGATG	GATCTCGGT	ACTTACGCC
sp-15353	ACTCGACTATGCGAGTGTAAATAGTTATTAGGCATAGTGCGGCAGGGTTCTTCCCTGCGTTAAC	AGAAA	TAATA	74	TGGCTTCAT	TCTCCTTCT	CGCGATACA	TGCCGATTG
sp-15411	ACTCGACTATGCGAGTTTAAATAGTAATTAGGCATAGTGCGTCCCGGCAGCTGCCGGGGGTTTAG	AGAAA	CAGTT	75	CACCGTATG	CCATAGCAC	TTTACCAGC	TCTGCAAGA
sp-15412	ACTCGACTATGCGAGTTTAAATAGTAATTAGGCATAGTGCGTCTTGGTCGGTATTACCGGCTGGGGGTTTAG	AGAAA	CAGTT	82	TGCAATGAG	GAGAGTGGT	GTGATACTG	GACTTCGGA
sp-15413	ACTCGACTATGCGAGTTTAAATAGTAATTAGGCATAGTGCGGCAGGGTTCTTCCCTGCGTTTAG	AGAAA	CAGTT	74	ACAGAGTAC	GCCGTCATA	CTACCCCAT	TATGAACGC
sp-15421	ACTCGACTATGCGAGTTTAAATAGGCTTTAGGCATAGTGCGTCCCGGCAGCTGCCGGGGGTAGTC	AGAAA	AAAAA	75	CCTCAATTC	ATGGCCCAA	CTGACGTCA	CGTAATCGG
sp-15422	ACTCGACTATGCGAGTTTAAATAGGCTTTAGGCATAGTGCGTCTTGGTCGGTATTACCGGCTGGGGGTAGTC	AGAAA	AAAAA	82	TCGATCCTT	TCAACACCG	GTATGGTCC	CTCGAGGTA
sp-15423	ACTCGACTATGCGAGTTTAAATAGGCTTTAGGCATAGTGCGGCAGGGTTCTTCCCTGCGTAGTC	AGAAA	AAAAA	74	AACCATCCG	TCTGACTTG	TGGCCTATC	CCTCATAGG
sp-15431	ACTCGACTATGCGAGTTTAAATAGACATTAGGCATAGTGCGTCCCGGCAGCTGCCGGGGGTTGTA	AGAAA	TAACT	75	TCAGGTAGT	ATGAGTGTG	AGCGCAAGT	CAACTAACG
sp-15432	ACTCGACTATGCGAGTTTAAATAGACATTAGGCATAGTGCGTCTTGGTCGGTATTACCGGCTGGGGGTTGTA	AGAAA	TAACT	82	TGACTGAGT	GGTTACAGG	CAAACTCGC	ACCCATCAG
sp-15433	ACTCGACTATGCGAGTTTAAATAGACATTAGGCATAGTGCGGCAGGGTTCTTCCCTGCGTTGTA	AGAAA	TAACT	74	CATCACATC	TTGGTGAGT	AGTGCTGGT	TCAGAATGC
sp-15441	ACTCGACTATGCGAGTTTAAATAGGTGTTAGGCATAGTGCGTCCCGGCAGCTGCCGGGGGTCACA	AGAAA	TTAAT	75	TCACGATGA	CGACCGATT	GTTCTGCAA	GATACGGCA
sp-15442	ACTCGACTATGCGAGTTTAAATAGGTGTTAGGCATAGTGCGTCTTGGTCGGTATTACCGGCTGGGGGTCACA	AGAAA	TTAAT	82	CAATTGCCC	GTACTGCTT	GATGGAAGC	CTCGGAAAG
sp-15443	ACTCGACTATGCGAGTTTAAATAGGTGTTAGGCATAGTGCGGCAGGGTTCTTCCCTGCGTCACA	AGAAA	TTAAT	74	AACCCAGTG	TGAGATGGA	AGGTAGCCT	CGGCATAAG
sp-15451	ACTCGACTATGCGAGTTTAAATAGTTATTAGGCATAGTGCGTCCCGGCAGCTGCCGGGGGTTAAC	AGAAA	TAATA	75	ATGTGAACG	GTCAAAGCG	TGTCCGACT	TAGCATGCA
sp-15452	ACTCGACTATGCGAGTTTAAATAGTTATTAGGCATAGTGCGTCTTGGTCGGTATTACCGGCTGGGGGTTAAC	AGAAA	TAATA	82	GTTCTGTCC	GTAGACCGT	TCCACTTTG	GCTAGGCTT
sp-15453	ACTCGACTATGCGAGTTTAAATAGTTATTAGGCATAGTGCGGCAGGGTTCTTCCCTGCGTTAAC	AGAAA	TAATA	74	TTTGTTGCC	TGTCGGCTA	AACTACTGC	AGCTGTCGT
sp-15511	ACTCGACTATGCGAGTATAAACGTAATTAGGCATAGTGCGTCCCGGCAGCTGCCGGGGGTTTAG	AGAAA	CAGTT	74	AACCGTTCT	AGACATGGG	AATACGCTG	GACGACTTT
sp-15512	ACTCGACTATGCGAGTATAAACGTAATTAGGCATAGTGCGTCTTGGTCGGTATTACCGGCTGGGGGTTTAG	AGAAA	CAGTT	81	AGGTGACAC	TTTCACGAG	TACTAGACG	TGTCTGGCT
sp-15513	ACTCGACTATGCGAGTATAAACGTAATTAGGCATAGTGCGGCAGGGTTCTTCCCTGCGTTTAG	AGAAA	CAGTT	73	CGTTTGCTC	ATGCTTCCA	ATCCGGAGT	GCAGTTATC
sp-15521	ACTCGACTATGCGAGTATAAACGGCTTTAGGCATAGTGCGTCCCGGCAGCTGCCGGGGGTAGTC	AGAAA	AAAAA	74	TTCAGAGGT	CGATTTCGA	CCAATCCAG	GCAGTATGC
sp-15522	ACTCGACTATGCGAGTATAAACGGCTTTAGGCATAGTGCGTCTTGGTCGGTATTACCGGCTGGGGGTAGTC	AGAAA	AAAAA	81	GTCCACATA	GGTCAAAGT	TTCGACGAA	CCCTATTTC
sp-15523	ACTCGACTATGCGAGTATAAACGGCTTTAGGCATAGTGCGGCAGGGTTCTTCCCTGCGTAGTC	AGAAA	AAAAA	73	TAGGAGTGA	ATAGATGCC	CTTCCATTG	CCCCTAGAT
sp-15531	ACTCGACTATGCGAGTATAAACGACATTAGGCATAGTGCGTCCCGGCAGCTGCCGGGGGTTGTA	AGAAA	TAACT	74	CCTTGATTC	AGCTTTTGC	TCTCCCAAC	TGAATGGAC
sp-15532	ACTCGACTATGCGAGTATAAACGACATTAGGCATAGTGCGTCTTGGTCGGTATTACCGGCTGGGGGTTGTA	AGAAA	TAACT	81	CTGAACTCC	AATCCGATC	ACCCCATGA	ACACTCCAT
sp-15533	ACTCGACTATGCGAGTATAAACGACATTAGGCATAGTGCGGCAGGGTTCTTCCCTGCGTTGTA	AGAAA	TAACT	73	AGGTGGGAA	AATATCCCG	TAGTAAGCC	CAAACGCAT
sp-15541	ACTCGACTATGCGAGTATAAACGGTGTTAGGCATAGTGCGTCCCGGCAGCTGCCGGGGGTCACA	AGAAA	TTAAT	74	GTGGAAGCA	CGTGCTTAG	TACGCATCG	TTTGGCCTG
sp-15542	ACTCGACTATGCGAGTATAAACGGTGTTAGGCATAGTGCGTCTTGGTCGGTATTACCGGCTGGGGGTCACA	AGAAA	TTAAT	81	AGGACTTGC	CGTGGTAGA	CACTTTCCT	TGCACTGCA
sp-15543	ACTCGACTATGCGAGTATAAACGGTGTTAGGCATAGTGCGGCAGGGTTCTTCCCTGCGTCACA	AGAAA	TTAAT	73	GATCCATTG	TTACCCAAC	GCTCATAGT	TGCTGTCCT
sp-15551	ACTCGACTATGCGAGTATAAACGTTATTAGGCATAGTGCGTCCCGGCAGCTGCCGGGGGTTAAC	AGAAA	TAATA	74	GTCTGCATG	TCTACGCTT	TCCAACCTT	ATCCCGTGA
sp-15552	ACTCGACTATGCGAGTATAAACGTTATTAGGCATAGTGCGTCTTGGTCGGTATTACCGGCTGGGGGTTAAC	AGAAA	TAATA	81	AAACGAGAG	CCCAAGGTA	TTACGGAGC	ATCAACCGA
sp-15553	ACTCGACTATGCGAGTATAAACGTTATTAGGCATAGTGCGGCAGGGTTCTTCCCTGCGTTAAC	AGAAA	TAATA	73	AGGTGCTCA	CATAATGCG	TCTCCTGAC	ACACAGGTT
sp-16111	ACTCGTTAGGGCGAGTATAAATAGTAATTAAGCCCTAAGCGTCCCGGCAGCTGCCGGGGGTTTAG	AGAAA	CAGTT	75	AGCCAGACA	TATAAGGCC	GATGCAAGA	GTGAGTTTC
sp-16112	ACTCGTTAGGGCGAGTATAAATAGTAATTAAGCCCTAAGCGTCTTGGTCGGTATTACCGGCTGGGGGTTTAG	AGAAA	CAGTT	82	AGCCCATGT	GGAGCTATC	AGGGGAGTT	TTACCGGAG
sp-16113	ACTCGTTAGGGCGAGTATAAATAGTAATTAAGCCCTAAGCGGCAGGGTTCTTCCCTGCGTTTAG	AGAAA	CAGTT	74	CACCGATTT	CTGTTCAAC	GCGGAGTAT	CGATCTACA
sp-16121	ACTCGTTAGGGCGAGTATAAATAGGCTTTAAGCCCTAAGCGTCCCGGCAGCTGCCGGGGGTAGTC	AGAAA	AAAAA	75	TCTACCGGT	TGGGATCCT	ATTGCGGAT	TTATTCGCG
sp-16122	ACTCGTTAGGGCGAGTATAAATAGGCTTTAAGCCCTAAGCGTCTTGGTCGGTATTACCGGCTGGGGGTAGTC	AGAAA	AAAAA	82	GCAAGGAGT	TCTAAGTCC	CCATCGAAA	TGCAAGAGC
sp-16123	ACTCGTTAGGGCGAGTATAAATAGGCTTTAAGCCCTAAGCGGCAGGGTTCTTCCCTGCGTAGTC	AGAAA	AAAAA	74	CAGCTTTCC	ATCTTACGG	TAGAGTGAG	TACGCAGAC
sp-16131	ACTCGTTAGGGCGAGTATAAATAGACATTAAGCCCTAAGCGTCCCGGCAGCTGCCGGGGGTTGTA	AGAAA	TAACT	75	CGATTTACG	CTGCAACCT	CAATACCAC	AACTTAGCC
sp-16132	ACTCGTTAGGGCGAGTATAAATAGACATTAAGCCCTAAGCGTCTTGGTCGGTATTACCGGCTGGGGGTTGTA	AGAAA	TAACT	82	GACAGTAAC	GGTTCAAGA	CACACTGCT	TTAAGCAGC
sp-16133	ACTCGTTAGGGCGAGTATAAATAGACATTAAGCCCTAAGCGGCAGGGTTCTTCCCTGCGTTGTA	AGAAA	TAACT	74	AAGATCGGG	GTCCAAATC	GAGCCTAGT	GCCCTAATT
sp-16141	ACTCGTTAGGGCGAGTATAAATAGGTGTTAAGCCCTAAGCGTCCCGGCAGCTGCCGGGGGTCACA	AGAAA	TTAAT	75	AGACCAGTT	GATAGTGCG	GGATCTATG	AGAGACAAG
sp-16142	ACTCGTTAGGGCGAGTATAAATAGGTGTTAAGCCCTAAGCGTCTTGGTCGGTATTACCGGCTGGGGGTCACA	AGAAA	TTAAT	82	GAGAACGTA	CGCTACGAT	GTTGTTGCA	TGAACTCCC
sp-16143	ACTCGTTAGGGCGAGTATAAATAGGTGTTAAGCCCTAAGCGGCAGGGTTCTTCCCTGCGTCACA	AGAAA	TTAAT	74	CTCCTCTAC	CAAATGGCG	ACAATCCCG	AGCAGATGA
sp-16151	ACTCGTTAGGGCGAGTATAAATAGTTATTAAGCCCTAAGCGTCCCGGCAGCTGCCGGGGGTTAAC	AGAAA	TAATA	75	CTCGGATTA	TCTTGGTTC	ATCCGAAGG	GACACCTAG
sp-16152	ACTCGTTAGGGCGAGTATAAATAGTTATTAAGCCCTAAGCGTCTTGGTCGGTATTACCGGCTGGGGGTTAAC	AGAAA	TAATA	82	CTTTGCCAT	GAACAGATC	AGTGCTCTT	TCGGATGAC
sp-16153	ACTCGTTAGGGCGAGTATAAATAGTTATTAAGCCCTAAGCGGCAGGGTTCTTCCCTGCGTTAAC	AGAAA	TAATA	74	TGTGAAGCC	ACTCTCTCC	AGTGCTCAC	TCCTTAGCA
sp-16211	ACTCGTTAGGGCGAGTATAAATAGGTAATTAAGCCCTAAGCGTCCCGGCAGCTGCCGGGGGTTTAG	AGAAA	CAGTT	76	GACACTCGT	CCAAGTAGC	GGGATGATC	GACAGTGAG
sp-16212	ACTCGTTAGGGCGAGTATAAATAGGTAATTAAGCCCTAAGCGTCTTGGTCGGTATTACCGGCTGGGGGTTTAG	AGAAA	CAGTT	83	AAGCGTGCA	CTAACGGGT	ATGCCTCCT	CCTCCTTAC
sp-16213	ACTCGTTAGGGCGAGTATAAATAGGTAATTAAGCCCTAAGCGGCAGGGTTCTTCCCTGCGTTTAG	AGAAA	CAGTT	75	TGGACATAC	ACGGGATTA	GAGATCTGC	GTACGGACA
sp-16221	ACTCGTTAGGGCGAGTATAAATAGGGCTTTAAGCCCTAAGCGTCCCGGCAGCTGCCGGGGGTAGTC	AGAAA	AAAAA	76	ATCTGCAGG	TGGTCCCTA	GACGAGCTT	ACCCATACA
sp-16222	ACTCGTTAGGGCGAGTATAAATAGGGCTTTAAGCCCTAAGCGTCTTGGTCGGTATTACCGGCTGGGGGTAGTC	AGAAA	AAAAA	83	GAAAACCGC	GACATTGTC	GGAAGCCAT	TCTGAACAG
sp-16223	ACTCGTTAGGGCGAGTATAAATAGGGCTTTAAGCCCTAAGCGGCAGGGTTCTTCCCTGCGTAGTC	AGAAA	AAAAA	75	GTGTGAGTT	CCTAAAAGC	AGTAGGATC	CGGTGCTAA
sp-16231	ACTCGTTAGGGCGAGTATAAATAGGACATTAAGCCCTAAGCGTCCCGGCAGCTGCCGGGGGTTGTA	AGAAA	TAACT	76	CATCGTGTT	TCCTCTCCA	GTTAGTCTC	TGGCCAAAC
sp-16232	ACTCGTTAGGGCGAGTATAAATAGGACATTAAGCCCTAAGCGTCTTGGTCGGTATTACCGGCTGGGGGTTGTA	AGAAA	TAACT	83	GATTCCAGA	CGGTAACCA	TGATCGACG	ACCCAGTAT
sp-16233	ACTCGTTAGGGCGAGTATAAATAGGACATTAAGCCCTAAGCGGCAGGGTTCTTCCCTGCGTTGTA	AGAAA	TAACT	75	TCGATCTCG	CCCGGAAAT	ATTGTGGCG	CGTGACAAC
sp-16241	ACTCGTTAGGGCGAGTATAAATAGGGTGTTAAGCCCTAAGCGTCCCGGCAGCTGCCGGGGGTCACA	AGAAA	TTAAT	76	CTGCGACTT	CTGTATTGC	TCGGCTATC	AAGGTCTTG
sp-16242	ACTCGTTAGGGCGAGTATAAATAGGGTGTTAAGCCCTAAGCGTCTTGGTCGGTATTACCGGCTGGGGGTCACA	AGAAA	TTAAT	83	GCCTGTTTC	ATCCAGGTG	CTAAAGCCC	GGACATTGT
sp-16243	ACTCGTTAGGGCGAGTATAAATAGGGTGTTAAGCCCTAAGCGGCAGGGTTCTTCCCTGCGTCACA	AGAAA	TTAAT	75	CATCAAAGC	AAATGGGCT	CGTCCATCA	AGGCGACAT
sp-16251	ACTCGTTAGGGCGAGTATAAATAGGTTATTAAGCCCTAAGCGTCCCGGCAGCTGCCGGGGGTTAAC	AGAAA	TAATA	76	ATCAGGTGA	CTTCTTGTC	GTTTCGCAT	ACCGTCCAT
sp-16252	ACTCGTTAGGGCGAGTATAAATAGGTTATTAAGCCCTAAGCGTCTTGGTCGGTATTACCGGCTGGGGGTTAAC	AGAAA	TAATA	83	CCAAATTCG	GATTACTCG	GAGAAAGCC	GAATTCTGG
sp-16253	ACTCGTTAGGGCGAGTATAAATAGGTTATTAAGCCCTAAGCGGCAGGGTTCTTCCCTGCGTTAAC	AGAAA	TAATA	75	GCTCAAATG	GGAACGTAG	CACAGTTCC	GATGGGCAA
sp-16311	ACTCGTTAGGGCGAGTGTAAATAGTAATTAAGCCCTAAGCGTCCCGGCAGCTGCCGGGGGTTTAG	AGAAA	CAGTT	75	GAACTGCTC	TCGCGACAT	ATATCGGGC	GACAGATCA
sp-16312	ACTCGTTAGGGCGAGTGTAAATAGTAATTAAGCCCTAAGCGTCTTGGTCGGTATTACCGGCTGGGGGTTTAG	AGAAA	CAGTT	82	GTACGCTTG	ACCAAGATG	TCCTGTCAG	CCGAATACC
sp-16313	ACTCGTTAGGGCGAGTGTAAATAGTAATTAAGCCCTAAGCGGCAGGGTTCTTCCCTGCGTTTAG	AGAAA	CAGTT	74	GTCAGTTCA	GTACCCAAT	TTTCCTGCA	TCTTTCAGC
sp-16321	ACTCGTTAGGGCGAGTGTAAATAGGCTTTAAGCCCTAAGCGTCCCGGCAGCTGCCGGGGGTAGTC	AGAAA	AAAAA	75	GCAATGGGA	ATTCATGCC	TATACGCCT	CCATACTAC
sp-16322	ACTCGTTAGGGCGAGTGTAAATAGGCTTTAAGCCCTAAGCGTCTTGGTCGGTATTACCGGCTGGGGGTAGTC	AGAAA	AAAAA	82	CAGCGAAAG	ACGCAGCTT	CGTTGCAAA	AACGCCACA
sp-16323	ACTCGTTAGGGCGAGTGTAAATAGGCTTTAAGCCCTAAGCGGCAGGGTTCTTCCCTGCGTAGTC	AGAAA	AAAAA	74	TCATCCTAC	CAAACCCTT	GTGAGGATT	GGGCATTAG
sp-16331	ACTCGTTAGGGCGAGTGTAAATAGACATTAAGCCCTAAGCGTCCCGGCAGCTGCCGGGGGTTGTA	AGAAA	TAACT	75	AATGGAGCT	AAACGTGCT	GAGTTCGAG	ATCGGGCAA
sp-16332	ACTCGTTAGGGCGAGTGTAAATAGACATTAAGCCCTAAGCGTCTTGGTCGGTATTACCGGCTGGGGGTTGTA	AGAAA	TAACT	82	ACTCGCATT	TACACTAGG	ACAGCTAAG	GCAACCACT
sp-16333	ACTCGTTAGGGCGAGTGTAAATAGACATTAAGCCCTAAGCGGCAGGGTTCTTCCCTGCGTTGTA	AGAAA	TAACT	74	TGAGTAGGT	CAAACGGAG	TGTTCAGGT	ATCCCTACC
sp-16341	ACTCGTTAGGGCGAGTGTAAATAGGTGTTAAGCCCTAAGCGTCCCGGCAGCTGCCGGGGGTCACA	AGAAA	TTAAT	75	CATTGGGCA	CGTCTCTCT	TCGGTTATG	AGCACACGA
sp-16342	ACTCGTTAGGGCGAGTGTAAATAGGTGTTAAGCCCTAAGCGTCTTGGTCGGTATTACCGGCTGGGGGTCACA	AGAAA	TTAAT	82	AATGGTCTC	GGTATCCTT	TGCTATAGC	CATCGTAAG
sp-16343	ACTCGTTAGGGCGAGTGTAAATAGGTGTTAAGCCCTAAGCGGCAGGGTTCTTCCCTGCGTCACA	AGAAA	TTAAT	74	CATGGCTGA	CCCACGAAA	GCCTGATCT	AGCCAACTT
sp-16351	ACTCGTTAGGGCGAGTGTAAATAGTTATTAAGCCCTAAGCGTCCCGGCAGCTGCCGGGGGTTAAC	AGAAA	TAATA	75	TGCGCTGAT	TGGGCTAAT	TTGCCGTGA	TCGAGTAGA
sp-16352	ACTCGTTAGGGCGAGTGTAAATAGTTATTAAGCCCTAAGCGTCTTGGTCGGTATTACCGGCTGGGGGTTAAC	AGAAA	TAATA	82	TCAGTTGGA	TTTTGGGAG	TTATGGACG	TGCACCTCA
sp-16353	ACTCGTTAGGGCGAGTGTAAATAGTTATTAAGCCCTAAGCGGCAGGGTTCTTCCCTGCGTTAAC	AGAAA	TAATA	74	TCTGGCCTT	AACCCCTTT	AGTTGTCTC	AAGTGCTGT
sp-16411	ACTCGTTAGGGCGAGTTTAAATAGTAATTAAGCCCTAAGCGTCCCGGCAGCTGCCGGGGGTTTAG	AGAAA	CAGTT	75	GCGTTCAGT	CTTAGCACT	TGATCCTCA	AAGTCTGAC
sp-16412	ACTCGTTAGGGCGAGTTTAAATAGTAATTAAGCCCTAAGCGTCTTGGTCGGTATTACCGGCTGGGGGTTTAG	AGAAA	CAGTT	82	GAACCTAGC	GAGGTGAAT	GTTATAGCG	ACGGCCTAA
sp-16413	ACTCGTTAGGGCGAGTTTAAATAGTAATTAAGCCCTAAGCGGCAGGGTTCTTCCCTGCGTTTAG	AGAAA	CAGTT	74	TAAGTACCC	CATGTACGG	TATAGGACC	CCATTCCCA
sp-16421	ACTCGTTAGGGCGAGTTTAAATAGGCTTTAAGCCCTAAGCGTCCCGGCAGCTGCCGGGGGTAGTC	AGAAA	AAAAA	75	GTTGGGGAA	TGGCTCAGA	GAGGCATGA	ACATGTCAG
sp-16422	ACTCGTTAGGGCGAGTTTAAATAGGCTTTAAGCCCTAAGCGTCTTGGTCGGTATTACCGGCTGGGGGTAGTC	AGAAA	AAAAA	82	TTTCGTAGG	TCACGTTCC	GATGGACAG	TCTTACCTG
sp-16423	ACTCGTTAGGGCGAGTTTAAATAGGCTTTAAGCCCTAAGCGGCAGGGTTCTTCCCTGCGTAGTC	AGAAA	AAAAA	74	GGTCTGACT	AGAGCGTAC	TTGCAACCA	GAGGGAATT
sp-16431	ACTCGTTAGGGCGAGTTTAAATAGACATTAAGCCCTAAGCGTCCCGGCAGCTGCCGGGGGTTGTA	AGAAA	TAACT	75	AGTCAAAGC	AGTTGCAGG	CATCTAGAG	ACAAAGGGC
sp-16432	ACTCGTTAGGGCGAGTTTAAATAGACATTAAGCCCTAAGCGTCTTGGTCGGTATTACCGGCTGGGGGTTGTA	AGAAA	TAACT	82	AAGACTTGG	CGCATCTTT	TCCGATCTT	CTCTGACTA
sp-16433	ACTCGTTAGGGCGAGTTTAAATAGACATTAAGCCCTAAGCGGCAGGGTTCTTCCCTGCGTTGTA	AGAAA	TAACT	74	GGTAGTACC	TGAGGTGCA	AGTGTGTGC	GGTGAGTCT
sp-16441	ACTCGTTAGGGCGAGTTTAAATAGGTGTTAAGCCCTAAGCGTCCCGGCAGCTGCCGGGGGTCACA	AGAAA	TTAAT	75	GGTTGAATC	GCTACGTGA	CTTTTACCG	ATCCTGGTC
sp-16442	ACTCGTTAGGGCGAGTTTAAATAGGTGTTAAGCCCTAAGCGTCTTGGTCGGTATTACCGGCTGGGGGTCACA	AGAAA	TTAAT	82	GGCCTATTG	CATGGCCAA	AGAAAACGG	GAGTAAAGG
sp-16443	ACTCGTTAGGGCGAGTTTAAATAGGTGTTAAGCCCTAAGCGGCAGGGTTCTTCCCTGCGTCACA	AGAAA	TTAAT	74	GTGAACGAT	ACAATCGGG	GCATTAGGT	TGTCCACTT
sp-16451	ACTCGTTAGGGCGAGTTTAAATAGTTATTAAGCCCTAAGCGTCCCGGCAGCTGCCGGGGGTTAAC	AGAAA	TAATA	75	CAGCATTCA	CCTCCTAAG	CTGAAGCGT	CGTATCACC
sp-16452	ACTCGTTAGGGCGAGTTTAAATAGTTATTAAGCCCTAAGCGTCTTGGTCGGTATTACCGGCTGGGGGTTAAC	AGAAA	TAATA	82	CGCTATCGA	GCTAAAACC	GCTTCGACA	GTTCCTTGA
sp-16453	ACTCGTTAGGGCGAGTTTAAATAGTTATTAAGCCCTAAGCGGCAGGGTTCTTCCCTGCGTTAAC	AGAAA	TAATA	74	GCTATTCGA	AATCTGTGG	CTCTCTCTC	GGTATGTGT
sp-16511	ACTCGTTAGGGCGAGTATAAACGTAATTAAGCCCTAAGCGTCCCGGCAGCTGCCGGGGGTTTAG	AGAAA	CAGTT	74	CTGACAGAC	AAGAGCTGG	GCATGACCA	AGTGCAACT
sp-16512	ACTCGTTAGGGCGAGTATAAACGTAATTAAGCCCTAAGCGTCTTGGTCGGTATTACCGGCTGGGGGTTTAG	AGAAA	CAGTT	81	CAACTTCGA	ACCCTTCAC	CTACGGGTT	CTAGCCCTT
sp-16513	ACTCGTTAGGGCGAGTATAAACGTAATTAAGCCCTAAGCGGCAGGGTTCTTCCCTGCGTTTAG	AGAAA	CAGTT	73	ACAGCGTAG	GAAGCCTCT	TGCGGTTAT	GTGTACTCC
sp-16521	ACTCGTTAGGGCGAGTATAAACGGCTTTAAGCCCTAAGCGTCCCGGCAGCTGCCGGGGGTAGTC	AGAAA	AAAAA	74	GTTACATGG	ATAGCGACA	CACATCCCA	CAATCTCAC
sp-16522	ACTCGTTAGGGCGAGTATAAACGGCTTTAAGCCCTAAGCGTCTTGGTCGGTATTACCGGCTGGGGGTAGTC	AGAAA	AAAAA	81	TTGAGTTGC	ACCGACTCA	GCACTGTAT	GTCAAGAGG
sp-16523	ACTCGTTAGGGCGAGTATAAACGGCTTTAAGCCCTAAGCGGCAGGGTTCTTCCCTGCGTAGTC	AGAAA	AAAAA	73	AGCTGTATC	CGTGGACAA	AGGCACTAC	AGACGCACT
sp-16531	ACTCGTTAGGGCGAGTATAAACGACATTAAGCCCTAAGCGTCCCGGCAGCTGCCGGGGGTTGTA	AGAAA	TAACT	74	GAACGACAT	CGCTATGTA	AGTAGGGAT	TCTCCCACA
sp-16532	ACTCGTTAGGGCGAGTATAAACGACATTAAGCCCTAAGCGTCTTGGTCGGTATTACCGGCTGGGGGTTGTA	AGAAA	TAACT	81	GGATATGGC	TCGGAATTC	AGGTTAACC	GAGCAAGTG
sp-16533	ACTCGTTAGGGCGAGTATAAACGACATTAAGCCCTAAGCGGCAGGGTTCTTCCCTGCGTTGTA	AGAAA	TAACT	73	CTGGCTATC	TGGAAGACA	AGTCCTCTC	TATGTGACG
sp-16541	ACTCGTTAGGGCGAGTATAAACGGTGTTAAGCCCTAAGCGTCCCGGCAGCTGCCGGGGGTCACA	AGAAA	TTAAT	74	GCTCTTATC	AGATGGACG	CGCAGATTT	GAAAACCCT
sp-16542	ACTCGTTAGGGCGAGTATAAACGGTGTTAAGCCCTAAGCGTCTTGGTCGGTATTACCGGCTGGGGGTCACA	AGAAA	TTAAT	81	ACTATACCC	GTATGTCAC	AGTAACTCG	GAATGCAGA
sp-16543	ACTCGTTAGGGCGAGTATAAACGGTGTTAAGCCCTAAGCGGCAGGGTTCTTCCCTGCGTCACA	AGAAA	TTAAT	73	TCCAACGTA	CCTGCTCTA	TTAGGTGGC	ATCTTCCAC
sp-16551	ACTCGTTAGGGCGAGTATAAACGTTATTAAGCCCTAAGCGTCCCGGCAGCTGCCGGGGGTTAAC	AGAAA	TAATA	74	TCTGTAGAC	AAGCACCAG	GATTCCTTC	TGTCACCGT
sp-16552	ACTCGTTAGGGCGAGTATAAACGTTATTAAGCCCTAAGCGTCTTGGTCGGTATTACCGGCTGGGGGTTAAC	AGAAA	TAATA	81	TGAGAGCGA	CCTAGAGAC	CTAGGTTGG	TATCTGCGT
sp-16553	ACTCGTTAGGGCGAGTATAAACGTTATTAAGCCCTAAGCGGCAGGGTTCTTCCCTGCGTTAAC	AGAAA	TAATA	73	TGCTCATAG	AGTGCGTGA	CACAACACC	CAGCGGTAT
sp-17111	ACTCGTGGCGGCGAGTATAAATAGTAATTAAGCCGCCAGCGTCCCGGCAGCTGCCGGGGGTTTAG	AGAAA	CAGTT	75	AGAAGCCAG	GTGGATACC	GTGAGGAGA	GAGAATGTG
sp-17112	ACTCGTGGCGGCGAGTATAAATAGTAATTAAGCCGCCAGCGTCTTGGTCGGTATTACCGGCTGGGGGTTTAG	AGAAA	CAGTT	82	ATAGGGAGC	GTCTATTCC	CGGTAAGAG	AATCGAGGT
sp-17113	ACTCGTGGCGGCGAGTATAAATAGTAATTAAGCCGCCAGCGGCAGGGTTCTTCCCTGCGTTTAG	AGAAA	CAGTT	74	TCTAGGATC	TTACCTGGG	GTCATAACC	TAGTCTTGC
sp-17121	ACTCGTGGCGGCGAGTATAAATAGGCTTTAAGCCGCCAGCGTCCCGGCAGCTGCCGGGGGTAGTC	AGAAA	AAAAA	75	GGTGGAGTA	CTTACCACG	TGAGTCTGA	ATGCGGTGA
sp-17122	ACTCGTGGCGGCGAGTATAAATAGGCTTTAAGCCGCCAGCGTCTTGGTCGGTATTACCGGCTGGGGGTAGTC	AGAAA	AAAAA	82	TGACCGAAA	GATTGCTCC	ATTTCCCGG	AGCATAGCG
sp-17123	ACTCGTGGCGGCGAGTATAAATAGGCTTTAAGCCGCCAGCGGCAGGGTTCTTCCCTGCGTAGTC	AGAAA	AAAAA	74	GGGTATAGC	GGATTCACC	TCACGAAAC	TAGGAAGAG
sp-17131	ACTCGTGGCGGCGAGTATAAATAGACATTAAGCCGCCAGCGTCCCGGCAGCTGCCGGGGGTTGTA	AGAAA	TAACT	75	CCGACTTTG	ACCTTGCTA	GTCATCGTC	CTTGCAGTA
sp-17132	ACTCGTGGCGGCGAGTATAAATAGACATTAAGCCGCCAGCGTCTTGGTCGGTATTACCGGCTGGGGGTTGTA	AGAAA	TAACT	82	CACTATTGG	AACGAGTTC	TAATCGGAG	CGGATGCAA
sp-17133	ACTCGTGGCGGCGAGTATAAATAGACATTAAGCCGCCAGCGGCAGGGTTCTTCCCTGCGTTGTA	AGAAA	TAACT	74	CCTGTACTT	ACAAGCACC	TGCTCTTCA	TTAACGGTC
sp-17141	ACTCGTGGCGGCGAGTATAAATAGGTGTTAAGCCGCCAGCGTCCCGGCAGCTGCCGGGGGTCACA	AGAAA	TTAAT	75	TACCAGGTC	ACGTAACCG	CCTTTCTGG	GCCTACTTT
sp-17142	ACTCGTGGCGGCGAGTATAAATAGGTGTTAAGCCGCCAGCGTCTTGGTCGGTATTACCGGCTGGGGGTCACA	AGAAA	TTAAT	82	CGAAAGCAT	CGATGCTTC	CTGTGCGTT	AGCCAGTTC
sp-17143	ACTCGTGGCGGCGAGTATAAATAGGTGTTAAGCCGCCAGCGGCAGGGTTCTTCCCTGCGTCACA	AGAAA	TTAAT	74	ACTTCGTGG	ATCCGAGCA	TCCTAAAGG	ACGGAGTTC
sp-17151	ACTCGTGGCGGCGAGTATAAATAGTTATTAAGCCGCCAGCGTCCCGGCAGCTGCCGGGGGTTAAC	AGAAA	TAATA	75	ACGCTGTTG	ACTAACGAC	CGTGCAACA	GTTGATGAG
sp-17152	ACTCGTGGCGGCGAGTATAAATAGTTATTAAGCCGCCAGCGTCTTGGTCGGTATTACCGGCTGGGGGTTAAC	AGAAA	TAATA	82	CAGGTGATT	CTAACAACG	TCAACCAGT	TGAGAGTCT
sp-17153	ACTCGTGGCGGCGAGTATAAATAGTTATTAAGCCGCCAGCGGCAGGGTTCTTCCCTGCGTTAAC	AGAAA	TAATA	74	GTAGGTACT	TATGCGACT	ATGCAAGTC	TGATCTCCT
sp-17211	ACTCGTGGCGGCGAGTATAAATAGGTAATTAAGCCGCCAGCGTCCCGGCAGCTGCCGGGGGTTTAG	AGAAA	CAGTT	76	AGAGAGCCT	TGGCAAAGA	TAGGAATCG	GAAGGCTTA
sp-17212	ACTCGTGGCGGCGAGTATAAATAGGTAATTAAGCCGCCAGCGTCTTGGTCGGTATTACCGGCTGGGGGTTTAG	AGAAA	CAGTT	83	ATGGAGCTA	CTGTCAGTC	GTGCTGATC	CTTGCTTTG
sp-17213	ACTCGTGGCGGCGAGTATAAATAGGTAATTAAGCCGCCAGCGGCAGGGTTCTTCCCTGCGTTTAG	AGAAA	CAGTT	75	CTATTGAGC	AGGGTCTGA	TGTGAGGTG	CGTACAGCA
sp-17221	ACTCGTGGCGGCGAGTATAAATAGGGCTTTAAGCCGCCAGCGTCCCGGCAGCTGCCGGGGGTAGTC	AGAAA	AAAAA	76	TGTTATCCG	GGTGAGCAT	AGTGTGGTG	TACCACCTA
sp-17222	ACTCGTGGCGGCGAGTATAAATAGGGCTTTAAGCCGCCAGCGTCTTGGTCGGTATTACCGGCTGGGGGTAGTC	AGAAA	AAAAA	83	GATGGTTCA	AAGTGTCGG	CATGTCTCC	GTTTGATGC
sp-17223	ACTCGTGGCGGCGAGTATAAATAGGGCTTTAAGCCGCCAGCGGCAGGGTTCTTCCCTGCGTAGTC	AGAAA	AAAAA	75	CCGAACATT	GACAGGAAT	GTTGCACCT	GCTTAAAGG
sp-17231	ACTCGTGGCGGCGAGTATAAATAGGACATTAAGCCGCCAGCGTCCCGGCAGCTGCCGGGGGTTGTA	AGAAA	TAACT	76	TACGCAACA	GGACCCAAA	ACTAGGGGA	ACGTAATGC
sp-17232	ACTCGTGGCGGCGAGTATAAATAGGACATTAAGCCGCCAGCGTCTTGGTCGGTATTACCGGCTGGGGGTTGTA	AGAAA	TAACT	83	ACTACCACA	GGTGAAGGT	GCAGCTTGA	CTAGTCGAA
sp-17233	ACTCGTGGCGGCGAGTATAAATAGGACATTAAGCCGCCAGCGGCAGGGTTCTTCCCTGCGTTGTA	AGAAA	TAACT	75	TGTTAGCCA	AGCGACAAC	CGTGTTCGT	CGGTTGTTG
sp-17241	ACTCGTGGCGGCGAGTATAAATAGGGTGTTAAGCCGCCAGCGTCCCGGCAGCTGCCGGGGGTCACA	AGAAA	TTAAT	76	GTGGTATCC	CTGCTTCAA	TCGCTTCCT	GGTCAGGAA
sp-17242	ACTCGTGGCGGCGAGTATAAATAGGGTGTTAAGCCGCCAGCGTCTTGGTCGGTATTACCGGCTGGGGGTCACA	AGAAA	TTAAT	83	TAATCCCCA	TGGTACTGA	ACAACGAGT	TCTTGTCCT
sp-17243	ACTCGTGGCGGCGAGTATAAATAGGGTGTTAAGCCGCCAGCGGCAGGGTTCTTCCCTGCGTCACA	AGAAA	TTAAT	75	ACAGTGCTC	ACAATGCCA	GGATCAACC	ACGTTCAAG
sp-17251	ACTCGTGGCGGCGAGTATAAATAGGTTATTAAGCCGCCAGCGTCCCGGCAGCTGCCGGGGGTTAAC	AGAAA	TAATA	76	TCAGAACGA	GCTGACAAG	AATGAGGGA	GGCGATCTT
sp-17252	ACTCGTGGCGGCGAGTATAAATAGGTTATTAAGCCGCCAGCGTCTTGGTCGGTATTACCGGCTGGGGGTTAAC	AGAAA	TAATA	83	AGGAACAGT	TATTTCCGG	CAACGGAAA	TCTCGGAGA
sp-17253	ACTCGTGGCGGCGAGTATAAATAGGTTATTAAGCCGCCAGCGGCAGGGTTCTTCCCTGCGTTAAC	AGAAA	TAATA	75	TGGTAGTCT	AGTAGGCAG	CCTTCGGAA	CACGTCTTA
sp-17311	ACTCGTGGCGGCGAGTGTAAATAGTAATTAAGCCGCCAGCGTCCCGGCAGCTGCCGGGGGTTTAG	AGAAA	CAGTT	75	TCAAGCGAG	GGTAAACCT	ATTTCGCGC	TCGTGCTTC
sp-17312	ACTCGTGGCGGCGAGTGTAAATAGTAATTAAGCCGCCAGCGTCTTGGTCGGTATTACCGGCTGGGGGTTTAG	AGAAA	CAGTT	82	AATCCTCTG	CACTGGAGA	AGCAGTGTA	AGTGAAACG
sp-17313	ACTCGTGGCGGCGAGTGTAAATAGTAATTAAGCCGCCAGCGGCAGGGTTCTTCCCTGCGTTTAG	AGAAA	CAGTT	74	TGGAAGGTC	AGATCAACG	AGCGGAATT	ACCACTCCT
sp-17321	ACTCGTGGCGGCGAGTGTAAATAGGCTTTAAGCCGCCAGCGTCCCGGCAGCTGCCGGGGGTAGTC	AGAAA	AAAAA	75	GTAAAGAGC	TAATGACGG	CCTCTCAGT	GCTGGTCTT
sp-17322	ACTCGTGGCGGCGAGTGTAAATAGGCTTTAAGCCGCCAGCGTCTTGGTCGGTATTACCGGCTGGGGGTAGTC	AGAAA	AAAAA	82	TTGATCCCG	TGGGTCGAA	CCATTTGTG	ATGCACGAT
sp-17323	ACTCGTGGCGGCGAGTGTAAATAGGCTTTAAGCCGCCAGCGGCAGGGTTCTTCCCTGCGTAGTC	AGAAA	AAAAA	74	GATTCTGCC	TAGCGTGAA	ACACATCGC	TACGAGAGA
sp-17331	ACTCGTGGCGGCGAGTGTAAATAGACATTAAGCCGCCAGCGTCCCGGCAGCTGCCGGGGGTTGTA	AGAAA	TAACT	75	CCTAGTAGA	GGTTACGTG	CAGTGAGTA	CGTACGTAG
sp-17332	ACTCGTGGCGGCGAGTGTAAATAGACATTAAGCCGCCAGCGTCTTGGTCGGTATTACCGGCTGGGGGTTGTA	AGAAA	TAACT	82	CGCACGTTA	GATGGCTTG	TTCTGAGAG	AGCGACTTA
sp-17333	ACTCGTGGCGGCGAGTGTAAATAGACATTAAGCCGCCAGCGGCAGGGTTCTTCCCTGCGTTGTA	AGAAA	TAACT	74	GTGAAGTTC	TGGATGAGC	GTATCACAC	ATACCAGGA
sp-17341	ACTCGTGGCGGCGAGTGTAAATAGGTGTTAAGCCGCCAGCGTCCCGGCAGCTGCCGGGGGTCACA	AGAAA	TTAAT	75	GACAGATGG	ATCTGGCCT	TCCAACACC	TGACGGTTG
sp-17342	ACTCGTGGCGGCGAGTGTAAATAGGTGTTAAGCCGCCAGCGTCTTGGTCGGTATTACCGGCTGGGGGTCACA	AGAAA	TTAAT	82	ACGCTACGT	ACGTCCACT	CGCCATTCA	ATCCCATCC
sp-17343	ACTCGTGGCGGCGAGTGTAAATAGGTGTTAAGCCGCCAGCGGCAGGGTTCTTCCCTGCGTCACA	AGAAA	TTAAT	74	ACGGATGAG	GGCAGAACT	GGTTACGCT	CACCTTGCA
sp-17351	ACTCGTGGCGGCGAGTGTAAATAGTTATTAAGCCGCCAGCGTCCCGGCAGCTGCCGGGGGTTAAC	AGAAA	TAATA	75	GTGGCCAAT	ACCTCTTGG	GCGCTCTAT	TGTGTCAGT
sp-17352	ACTCGTGGCGGCGAGTGTAAATAGTTATTAAGCCGCCAGCGTCTTGGTCGGTATTACCGGCTGGGGGTTAAC	AGAAA	TAATA	82	ACATACCGC	CCCTGAACT	GGTACCTCT	TGGCGTATA
sp-17353	ACTCGTGGCGGCGAGTGTAAATAGTTATTAAGCCGCCAGCGGCAGGGTTCTTCCCTGCGTTAAC	AGAAA	TAATA	74	TTAAGTGCC	CGCAAAGCT	AAAGAACGG	ATTGTGTCC
sp-17411	ACTCGTGGCGGCGAGTTTAAATAGTAATTAAGCCGCCAGCGTCCCGGCAGCTGCCGGGGGTTTAG	AGAAA	CAGTT	75	CATAGGTGC	GAAGGAGAG	GATCCCATG	CGGCTTAAA
sp-17412	ACTCGTGGCGGCGAGTTTAAATAGTAATTAAGCCGCCAGCGTCTTGGTCGGTATTACCGGCTGGGGGTTTAG	AGAAA	CAGTT	82	ACGGCTTAT	CCTTAGGTT	GATGCATCA	TGGTGAGTA
sp-17413	ACTCGTGGCGGCGAGTTTAAATAGTAATTAAGCCGCCAGCGGCAGGGTTCTTCCCTGCGTTTAG	AGAAA	CAGTT	74	GCTCAGATC	ACTGACCAA	CAACGTCTA	CGTAGGAAC
sp-17421	ACTCGTGGCGGCGAGTTTAAATAGGCTTTAAGCCGCCAGCGTCCCGGCAGCTGCCGGGGGTAGTC	AGAAA	AAAAA	75	GATCTGGAG	GTGCTCTCT	CAGCCTATC	TCAGAGGAC
sp-17422	ACTCGTGGCGGCGAGTTTAAATAGGCTTTAAGCCGCCAGCGTCTTGGTCGGTATTACCGGCTGGGGGTAGTC	AGAAA	AAAAA	82	CCAGTGCTA	GCACAACTA	TCACCAAGC	GTGATGTGC
sp-17423	ACTCGTGGCGGCGAGTTTAAATAGGCTTTAAGCCGCCAGCGGCAGGGTTCTTCCCTGCGTAGTC	AGAAA	AAAAA	74	GAGGCTTTT	GACTTCCTC	GGTCTACAT	TTGGTTCCT
sp-17431	ACTCGTGGCGGCGAGTTTAAATAGACATTAAGCCGCCAGCGTCCCGGCAGCTGCCGGGGGTTGTA	AGAAA	TAACT	75	TGGCGATAT	TCAGTACGG	ACGTCAAGC	TCCTGCAGT
sp-17432	ACTCGTGGCGGCGAGTTTAAATAGACATTAAGCCGCCAGCGTCTTGGTCGGTATTACCGGCTGGGGGTTGTA	AGAAA	TAACT	82	GAAACCCAA	ACTACCGTG	AACAAGACC	CTGTCTGCT
sp-17433	ACTCGTGGCGGCGAGTTTAAATAGACATTAAGCCGCCAGCGGCAGGGTTCTTCCCTGCGTTGTA	AGAAA	TAACT	74	TTGACGGTA	AGGGACTCA	TGGGATTTG	CTTCTGTTG
sp-17441	ACTCGTGGCGGCGAGTTTAAATAGGTGTTAAGCCGCCAGCGTCCCGGCAGCTGCCGGGGGTCACA	AGAAA	TTAAT	75	GCTTCTCCT	CTAGCTCTC	TACGTCATC	TGCCAAAAG
sp-17442	ACTCGTGGCGGCGAGTTTAAATAGGTGTTAAGCCGCCAGCGTCTTGGTCGGTATTACCGGCTGGGGGTCACA	AGAAA	TTAAT	82	AGGCTCGTA	ACGATTCTG	AAACTGGGG	GCCTTGGTA
sp-17443	ACTCGTGGCGGCGAGTTTAAATAGGTGTTAAGCCGCCAGCGGCAGGGTTCTTCCCTGCGTCACA	AGAAA	TTAAT	74	CCACGGTAA	GAGACTAAG	ACTACCTGC	TCTGAACGT
sp-17451	ACTCGTGGCGGCGAGTTTAAATAGTTATTAAGCCGCCAGCGTCCCGGCAGCTGCCGGGGGTTAAC	AGAAA	TAATA	75	GCTAACTTG	TCAGCTTCG	AACGGCTCT	CAAAACAGC
sp-17452	ACTCGTGGCGGCGAGTTTAAATAGTTATTAAGCCGCCAGCGTCTTGGTCGGTATTACCGGCTGGGGGTTAAC	AGAAA	TAATA	82	ACGTTCCAA	GCATCACAT	AGAATCGGT	GAAGCCAAG
sp-17453	ACTCGTGGCGGCGAGTTTAAATAGTTATTAAGCCGCCAGCGGCAGGGTTCTTCCCTGCGTTAAC	AGAAA	TAATA	74	TGACTACGA	ACCCAAGTA	TTCTTACCC	CCGAATCAG
sp-17511	ACTCGTGGCGGCGAGTATAAACGTAATTAAGCCGCCAGCGTCCCGGCAGCTGCCGGGGGTTTAG	AGAAA	CAGTT	74	AAGTCGACA	TAGGATCTC	CACAGTTGA	AGATCCGAA
sp-17512	ACTCGTGGCGGCGAGTATAAACGTAATTAAGCCGCCAGCGTCTTGGTCGGTATTACCGGCTGGGGGTTTAG	AGAAA	CAGTT	81	CCTCACAAA	ATCCTACGT	GGTTACCTA	TTGTGTCGT
sp-17513	ACTCGTGGCGGCGAGTATAAACGTAATTAAGCCGCCAGCGGCAGGGTTCTTCCCTGCGTTTAG	AGAAA	CAGTT	73	GAAGTCACA	ACCTCTAGC	CAGCGCAAA	GTAACGCTT
sp-17521	ACTCGTGGCGGCGAGTATAAACGGCTTTAAGCCGCCAGCGTCCCGGCAGCTGCCGGGGGTAGTC	AGAAA	AAAAA	74	TGACCGCAT	AGACGATTG	TGGGTGGAT	CGCCGTTTA
sp-17522	ACTCGTGGCGGCGAGTATAAACGGCTTTAAGCCGCCAGCGTCTTGGTCGGTATTACCGGCTGGGGGTAGTC	AGAAA	AAAAA	81	TCAGCTGTC	GGTCAACAG	AATGGACCA	GTGCCTCTA
sp-17523	ACTCGTGGCGGCGAGTATAAACGGCTTTAAGCCGCCAGCGGCAGGGTTCTTCCCTGCGTAGTC	AGAAA	AAAAA	73	GTTTAAGCG	TCCTCATGG	AATCCACAG	TTATGACGC
sp-17531	ACTCGTGGCGGCGAGTATAAACGACATTAAGCCGCCAGCGTCCCGGCAGCTGCCGGGGGTTGTA	AGAAA	TAACT	74	TGGATGGTG	GCTGAAGTT	AGCTTACCA	TGTCAACCT
sp-17532	ACTCGTGGCGGCGAGTATAAACGACATTAAGCCGCCAGCGTCTTGGTCGGTATTACCGGCTGGGGGTTGTA	AGAAA	TAACT	81	TTGACGGAT	CAGCGTGAT	TAACTGGTG	TGGTCGAGA
sp-17533	ACTCGTGGCGGCGAGTATAAACGACATTAAGCCGCCAGCGGCAGGGTTCTTCCCTGCGTTGTA	AGAAA	TAACT	73	TGAACGCCA	GGTCCATAG	ATCTGTGGG	TATCGGGAT
sp-17541	ACTCGTGGCGGCGAGTATAAACGGTGTTAAGCCGCCAGCGTCCCGGCAGCTGCCGGGGGTCACA	AGAAA	TTAAT	74	TGGGAAACA	GCAGAAATG	AGTGCTTGC	ACTTTTGCC
sp-17542	ACTCGTGGCGGCGAGTATAAACGGTGTTAAGCCGCCAGCGTCTTGGTCGGTATTACCGGCTGGGGGTCACA	AGAAA	TTAAT	81	GAGCTAACT	TTAAGCGGA	GCAATGGAC	CGGAGATAA
sp-17543	ACTCGTGGCGGCGAGTATAAACGGTGTTAAGCCGCCAGCGGCAGGGTTCTTCCCTGCGTCACA	AGAAA	TTAAT	73	TGTTCGGCA	TCTCAGAGC	GGATCACTA	CACTTTTGC
sp-17551	ACTCGTGGCGGCGAGTATAAACGTTATTAAGCCGCCAGCGTCCCGGCAGCTGCCGGGGGTTAAC	AGAAA	TAATA	74	CGCTCAAAA	CTCCCGTAA	CGAACGTGT	AGGGATCTT
sp-17552	ACTCGTGGCGGCGAGTATAAACGTTATTAAGCCGCCAGCGTCTTGGTCGGTATTACCGGCTGGGGGTTAAC	AGAAA	TAATA	81	TAGTGTGAC	AAAGGCTTC	TCGTCAGAC	GTCACAGTT
sp-17553	ACTCGTGGCGGCGAGTATAAACGTTATTAAGCCGCCAGCGGCAGGGTTCTTCCCTGCGTTAAC	AGAAA	TAATA	73	GAATCTGGT	TTGCTGGAT	GACCGGATA	GCGTTGATC
sp-21111	GCTCGTCTGGGCGAGGATAAATAGTAATTAGGCCCAGAGCGTCCCGGCAGCTGCCGGGGGTTTAG	ATGAA	CAGTT	75	TGCTGAAGT	TCGGCGTTT	AGCCAGCAT	TGTAAGCCC
sp-21112	GCTCGTCTGGGCGAGGATAAATAGTAATTAGGCCCAGAGCGTCTTGGTCGGTATTACCGGCTGGGGGTTTAG	ATGAA	CAGTT	82	ACGAATTGC	TCCCTACAC	TCTCACATC	TACAGGTAC
sp-21113	GCTCGTCTGGGCGAGGATAAATAGTAATTAGGCCCAGAGCGGCAGGGTTCTTCCCTGCGTTTAG	ATGAA	CAGTT	74	ACAACAGGG	TCTCGGCAA	GCCTTTGAG	GAAATTCCG
sp-21121	GCTCGTCTGGGCGAGGATAAATAGGCTTTAGGCCCAGAGCGTCCCGGCAGCTGCCGGGGGTAGTC	ATGAA	AAAAA	75	TCGATTTGC	AACCCTTTG	AGTGTCGAA	CAGCGTTAA
sp-21122	GCTCGTCTGGGCGAGGATAAATAGGCTTTAGGCCCAGAGCGTCTTGGTCGGTATTACCGGCTGGGGGTAGTC	ATGAA	AAAAA	82	AGGACTCCA	GGAGAGTAC	AGGGCACAT	TTCCCACCT
sp-21123	GCTCGTCTGGGCGAGGATAAATAGGCTTTAGGCCCAGAGCGGCAGGGTTCTTCCCTGCGTAGTC	ATGAA	AAAAA	74	AGGTTGCAT	GCTAAGAAC	GACTTGTGG	ATGGCGGTT
sp-21131	GCTCGTCTGGGCGAGGATAAATAGACATTAGGCCCAGAGCGTCCCGGCAGCTGCCGGGGGTTGTA	ATGAA	TAACT	75	TCTCCCTAA	CAGGGTTTG	TCGCTTAAC	CGAACGCAA
sp-21132	GCTCGTCTGGGCGAGGATAAATAGACATTAGGCCCAGAGCGTCTTGGTCGGTATTACCGGCTGGGGGTTGTA	ATGAA	TAACT	82	CTCAATACG	AGACCCTAA	TGCTGGATA	ACCAAATGC
sp-21133	GCTCGTCTGGGCGAGGATAAATAGACATTAGGCCCAGAGCGGCAGGGTTCTTCCCTGCGTTGTA	ATGAA	TAACT	74	TGCGTAGTC	GCGAATAAC	GAAGAAGCT	CTAGCTGTG
sp-21141	GCTCGTCTGGGCGAGGATAAATAGGTGTTAGGCCCAGAGCGTCCCGGCAGCTGCCGGGGGTCACA	ATGAA	TTAAT	75	CTGTGAAGG	GGGCAGATT	CCGTATGTG	GCAGTTTAG
sp-21142	GCTCGTCTGGGCGAGGATAAATAGGTGTTAGGCCCAGAGCGTCTTGGTCGGTATTACCGGCTGGGGGTCACA	ATGAA	TTAAT	82	ATATCCTGC	CTTTCTACC	GAAGTCCAA	CGGTCTATA
sp-21143	GCTCGTCTGGGCGAGGATAAATAGGTGTTAGGCCCAGAGCGGCAGGGTTCTTCCCTGCGTCACA	ATGAA	TTAAT	74	TTCACCTGA	TACGGGATG	ATAGCGAAG	TATAGTCCC
sp-21151	GCTCGTCTGGGCGAGGATAAATAGTTATTAGGCCCAGAGCGTCCCGGCAGCTGCCGGGGGTTAAC	ATGAA	TAATA	75	CTAGTTAGC	GTGCTTAAG	GCATGTAGT	TCCATGGGA
sp-21152	GCTCGTCTGGGCGAGGATAAATAGTTATTAGGCCCAGAGCGTCTTGGTCGGTATTACCGGCTGGGGGTTAAC	ATGAA	TAATA	82	TTTCGCTAG	TCACAAGAC	ATCCACTTG	GAATACCCG
sp-21153	GCTCGTCTGGGCGAGGATAAATAGTTATTAGGCCCAGAGCGGCAGGGTTCTTCCCTGCGTTAAC	ATGAA	TAATA	74	AACGCTAGG	AACTCGACT	TCATTCCTG	CTAATCACC
sp-21211	GCTCGTCTGGGCGAGGATAAATAGGTAATTAGGCCCAGAGCGTCCCGGCAGCTGCCGGGGGTTTAG	ATGAA	CAGTT	76	GGTCATATG	TTGCGTCTC	GTGGTGATT	TCTATCCAC
sp-21212	GCTCGTCTGGGCGAGGATAAATAGGTAATTAGGCCCAGAGCGTCTTGGTCGGTATTACCGGCTGGGGGTTTAG	ATGAA	CAGTT	83	GGTCAGAAC	AGTTCGGAT	CGAATGAGC	AGGATTTCC
sp-21213	GCTCGTCTGGGCGAGGATAAATAGGTAATTAGGCCCAGAGCGGCAGGGTTCTTCCCTGCGTTTAG	ATGAA	CAGTT	75	TCGTTGTTC	CAAAAGTGG	CGTAGAAGA	ACGACGATG
sp-21221	GCTCGTCTGGGCGAGGATAAATAGGGCTTTAGGCCCAGAGCGTCCCGGCAGCTGCCGGGGGTAGTC	ATGAA	AAAAA	76	GTTAGCGTA	AGCCTTACG	CAAGACTTC	CTAGGGTAA
sp-21222	GCTCGTCTGGGCGAGGATAAATAGGGCTTTAGGCCCAGAGCGTCTTGGTCGGTATTACCGGCTGGGGGTAGTC	ATGAA	AAAAA	83	TAGAGTCCG	TCTGTAGGA	TGAGGATCG	GCAGGCTAA
sp-21223	GCTCGTCTGGGCGAGGATAAATAGGGCTTTAGGCCCAGAGCGGCAGGGTTCTTCCCTGCGTAGTC	ATGAA	AAAAA	75	CTCTGTACA	TGCTCGACT	ATCCACACA	GTCTATACG
sp-21231	GCTCGTCTGGGCGAGGATAAATAGGACATTAGGCCCAGAGCGTCCCGGCAGCTGCCGGGGGTTGTA	ATGAA	TAACT	76	TATACCCGA	CTTCTTTCG	ACGTAGGGA	CAATACGCC
sp-21232	GCTCGTCTGGGCGAGGATAAATAGGACATTAGGCCCAGAGCGTCTTGGTCGGTATTACCGGCTGGGGGTTGTA	ATGAA	TAACT	83	CTCACCGAA	ACTCAGGGA	TCCATCAAC	CCAGATTCT
sp-21233	GCTCGTCTGGGCGAGGATAAATAGGACATTAGGCCCAGAGCGGCAGGGTTCTTCCCTGCGTTGTA	ATGAA	TAACT	75	TACTACCCA	TCGTGAGTC	CCTGTAATG	GAAGCACAT
sp-21241	GCTCGTCTGGGCGAGGATAAATAGGGTGTTAGGCCCAGAGCGTCCCGGCAGCTGCCGGGGGTCACA	ATGAA	TTAAT	76	CATACACGC	ATAGGAGCG	ATCCTGTCG	AGTGGATGA
sp-21242	GCTCGTCTGGGCGAGGATAAATAGGGTGTTAGGCCCAGAGCGTCTTGGTCGGTATTACCGGCTGGGGGTCACA	ATGAA	TTAAT	83	GAGCCGTTA	CGTAGAGAA	AAAGGCGCT	CTTAGGAGC
sp-21243	GCTCGTCTGGGCGAGGATAAATAGGGTGTTAGGCCCAGAGCGGCAGGGTTCTTCCCTGCGTCACA	ATGAA	TTAAT	75	CCTTGATAG	TTACGGCTC	GGGTCACAA	GGTAAGCTT
sp-21251	GCTCGTCTGGGCGAGGATAAATAGGTTATTAGGCCCAGAGCGTCCCGGCAGCTGCCGGGGGTTAAC	ATGAA	TAATA	76	AAGTTCACG	AGTAAACCG	TGTGTCATG	ACCTTGTAC
sp-21252	GCTCGTCTGGGCGAGGATAAATAGGTTATTAGGCCCAGAGCGTCTTGGTCGGTATTACCGGCTGGGGGTTAAC	ATGAA	TAATA	83	GTAACCAAG	GGAAATGCG	CTGACTTTC	GATTGACTG
sp-21253	GCTCGTCTGGGCGAGGATAAATAGGTTATTAGGCCCAGAGCGGCAGGGTTCTTCCCTGCGTTAAC	ATGAA	TAATA	75	AGTTGTCGG	GGGTCCTTT	TTCAGGTTG	CTACACCAG
sp-21311	GCTCGTCTGGGCGAGGGTAAATAGTAATTAGGCCCAGAGCGTCCCGGCAGCTGCCGGGGGTTTAG	ATGAA	CAGTT	75	AGGGCATAG	AGGAGCAAC	TGGGTCCAT	GGTTGGAAC
sp-21312	GCTCGTCTGGGCGAGGGTAAATAGTAATTAGGCCCAGAGCGTCTTGGTCGGTATTACCGGCTGGGGGTTTAG	ATGAA	CAGTT	82	TCAATCGCG	GCTTCGAAG	GTGTATCTC	AATCGGGTC
sp-21313	GCTCGTCTGGGCGAGGGTAAATAGTAATTAGGCCCAGAGCGGCAGGGTTCTTCCCTGCGTTTAG	ATGAA	CAGTT	74	TATGCCAGA	ACCGCTCAT	GCCTAAAAG	AGGGTGAAG
sp-21321	GCTCGTCTGGGCGAGGGTAAATAGGCTTTAGGCCCAGAGCGTCCCGGCAGCTGCCGGGGGTAGTC	ATGAA	AAAAA	75	CGAGGTGTA	CCAACTGGA	TGCGTCAAC	CGCTACATT
sp-21322	GCTCGTCTGGGCGAGGGTAAATAGGCTTTAGGCCCAGAGCGTCTTGGTCGGTATTACCGGCTGGGGGTAGTC	ATGAA	AAAAA	82	AGGGGTAGT	GCTTGTATG	CCTAAATCC	CTGCTGCAT
sp-21323	GCTCGTCTGGGCGAGGGTAAATAGGCTTTAGGCCCAGAGCGGCAGGGTTCTTCCCTGCGTAGTC	ATGAA	AAAAA	74	GCTGGACAA	GGCTTCAAG	CCTAGCCTT	CAGTAGCAT
sp-21331	GCTCGTCTGGGCGAGGGTAAATAGACATTAGGCCCAGAGCGTCCCGGCAGCTGCCGGGGGTTGTA	ATGAA	TAACT	75	TCCATTGCG	CATACAGAC	CTTCGATGA	ATGTCGTGA
sp-21332	GCTCGTCTGGGCGAGGGTAAATAGACATTAGGCCCAGAGCGTCTTGGTCGGTATTACCGGCTGGGGGTTGTA	ATGAA	TAACT	82	GACTGGATT	GATTCACAG	GGTATGGAT	AATGAGCGC
sp-21333	GCTCGTCTGGGCGAGGGTAAATAGACATTAGGCCCAGAGCGGCAGGGTTCTTCCCTGCGTTGTA	ATGAA	TAACT	74	TAGGACCAA	GTGATGAGT	GGAATCCTG	GCTGAATCT
sp-21341	GCTCGTCTGGGCGAGGGTAAATAGGTGTTAGGCCCAGAGCGTCCCGGCAGCTGCCGGGGGTCACA	ATGAA	TTAAT	75	AGAGAGTCG	ACGAACCCT	ACGAGGAAA	TGTCACATG
sp-21342	GCTCGTCTGGGCGAGGGTAAATAGGTGTTAGGCCCAGAGCGTCTTGGTCGGTATTACCGGCTGGGGGTCACA	ATGAA	TTAAT	82	GCAACGATT	GTTCACGTG	GACCATTTG	GACTTCATG
sp-21343	GCTCGTCTGGGCGAGGGTAAATAGGTGTTAGGCCCAGAGCGGCAGGGTTCTTCCCTGCGTCACA	ATGAA	TTAAT	74	ACCATCTGG	TAGCAGGTA	AGTACGCGA	CCGTTCAAT
sp-21351	GCTCGTCTGGGCGAGGGTAAATAGTTATTAGGCCCAGAGCGTCCCGGCAGCTGCCGGGGGTTAAC	ATGAA	TAATA	75	TTGCAGGAG	ATTGGGAGG	TAACCGAAC	GTGAAGGGA
sp-21352	GCTCGTCTGGGCGAGGGTAAATAGTTATTAGGCCCAGAGCGTCTTGGTCGGTATTACCGGCTGGGGGTTAAC	ATGAA	TAATA	82	GTGGAGTGT	TCCTTGGCT	GGTGAGAAG	CGATACCGT
sp-21353	GCTCGTCTGGGCGAGGGTAAATAGTTATTAGGCCCAGAGCGGCAGGGTTCTTCCCTGCGTTAAC	ATGAA	TAATA	74	ACCTAAGCG	CTCTACACT	CACTCCCAA	CCTCATCTT
sp-21411	GCTCGTCTGGGCGAGGTTAAATAGTAATTAGGCCCAGAGCGTCCCGGCAGCTGCCGGGGGTTTAG	ATGAA	CAGTT	75	AACAGAAGC	GAATCTACC	GTACTCCAT	CAGCTAGAC
sp-21412	GCTCGTCTGGGCGAGGTTAAATAGTAATTAGGCCCAGAGCGTCTTGGTCGGTATTACCGGCTGGGGGTTTAG	ATGAA	CAGTT	82	AGGCCCAAA	AGCCCCATT	TCCCTGCAA	ACGTTGAGG
sp-21413	GCTCGTCTGGGCGAGGTTAAATAGTAATTAGGCCCAGAGCGGCAGGGTTCTTCCCTGCGTTTAG	ATGAA	CAGTT	74	TGGGTGCTT	TGGCCGTAA	CATGAGCGA	GATCTCACA
sp-21421	GCTCGTCTGGGCGAGGTTAAATAGGCTTTAGGCCCAGAGCGTCCCGGCAGCTGCCGGGGGTAGTC	ATGAA	AAAAA	75	TTGCCGTTT	CCTTCTTCT	ACAGTAGAC	ATGTACGTC
sp-21422	GCTCGTCTGGGCGAGGTTAAATAGGCTTTAGGCCCAGAGCGTCTTGGTCGGTATTACCGGCTGGGGGTAGTC	ATGAA	AAAAA	82	TTTAGCGCG	TGAGCTACA	TCAGACTCG	ATGAGGGGT
sp-21423	GCTCGTCTGGGCGAGGTTAAATAGGCTTTAGGCCCAGAGCGGCAGGGTTCTTCCCTGCGTAGTC	ATGAA	AAAAA	74	CTCTGTCAA	CTCCACAAG	TGGAGTTCG	CTTCAGAAG
sp-21431	GCTCGTCTGGGCGAGGTTAAATAGACATTAGGCCCAGAGCGTCCCGGCAGCTGCCGGGGGTTGTA	ATGAA	TAACT	75	GGTCACATC	AAAGCCTTG	AAAGGAAGC	TTCTGGAGT
sp-21432	GCTCGTCTGGGCGAGGTTAAATAGACATTAGGCCCAGAGCGTCTTGGTCGGTATTACCGGCTGGGGGTTGTA	ATGAA	TAACT	82	TAACCTGCG	GCTTCACCA	TACGCCTAC	ACGGGTAGA
sp-21433	GCTCGTCTGGGCGAGGTTAAATAGACATTAGGCCCAGAGCGGCAGGGTTCTTCCCTGCGTTGTA	ATGAA	TAACT	74	ACCTGGTTT	GTTTAGGTC	CGAATGTTG	CGATGTCGT
sp-21441	GCTCGTCTGGGCGAGGTTAAATAGGTGTTAGGCCCAGAGCGTCCCGGCAGCTGCCGGGGGTCACA	ATGAA	TTAAT	75	ATAAGCCCG	ATCCAGGGA	GAAAAGGCC	AGCCTCTAG
sp-21442	GCTCGTCTGGGCGAGGTTAAATAGGTGTTAGGCCCAGAGCGTCTTGGTCGGTATTACCGGCTGGGGGTCACA	ATGAA	TTAAT	82	CCGAAGTAG	GAACCACAC	CGAGCTCTT	AAGTGTGGT
sp-21443	GCTCGTCTGGGCGAGGTTAAATAGGTGTTAGGCCCAGAGCGGCAGGGTTCTTCCCTGCGTCACA	ATGAA	TTAAT	74	TAGGCAATG	GCATTTCGA	GGGCTTTTG	CAGATGGAT
sp-21451	GCTCGTCTGGGCGAGGTTAAATAGTTATTAGGCCCAGAGCGTCCCGGCAGCTGCCGGGGGTTAAC	ATGAA	TAATA	75	GAATGAGGA	GTCTTAGCC	CGATTGGTA	TCAACCTGG
sp-21452	GCTCGTCTGGGCGAGGTTAAATAGTTATTAGGCCCAGAGCGTCTTGGTCGGTATTACCGGCTGGGGGTTAAC	ATGAA	TAATA	82	CGGATTCTC	GCATGATGA	CCTCGAACA	GTTTCCCAG
sp-21453	GCTCGTCTGGGCGAGGTTAAATAGTTATTAGGCCCAGAGCGGCAGGGTTCTTCCCTGCGTTAAC	ATGAA	TAATA	74	GTCTCGACT	GATCTTTGC	GTTTCAGTC	CTGCAAACA
sp-21511	GCTCGTCTGGGCGAGGATAAACGTAATTAGGCCCAGAGCGTCCCGGCAGCTGCCGGGGGTTTAG	ATGAA	CAGTT	74	GTGCAATGA	ACAAGAGGT	GATACTAGC	TGCATCGTA
sp-21512	GCTCGTCTGGGCGAGGATAAACGTAATTAGGCCCAGAGCGTCTTGGTCGGTATTACCGGCTGGGGGTTTAG	ATGAA	CAGTT	81	ATGACGGTC	AAGGCATCC	TTTCCCTGG	CTAAGCGAG
sp-21513	GCTCGTCTGGGCGAGGATAAACGTAATTAGGCCCAGAGCGGCAGGGTTCTTCCCTGCGTTTAG	ATGAA	CAGTT	73	AGGGCAATC	CGTCTGAGT	TCCGAGGAA	CTCTCTTAC
sp-21521	GCTCGTCTGGGCGAGGATAAACGGCTTTAGGCCCAGAGCGTCCCGGCAGCTGCCGGGGGTAGTC	ATGAA	AAAAA	74	AGAAGGCTT	TTTCTCCCT	CCGAAATCG	CCTTCGAAC
sp-21522	GCTCGTCTGGGCGAGGATAAACGGCTTTAGGCCCAGAGCGTCTTGGTCGGTATTACCGGCTGGGGGTAGTC	ATGAA	AAAAA	81	AGTACCTTG	CTGCCTGAA	CGGTAGATC	CTGGGTATG
sp-21523	GCTCGTCTGGGCGAGGATAAACGGCTTTAGGCCCAGAGCGGCAGGGTTCTTCCCTGCGTAGTC	ATGAA	AAAAA	73	CCTCTTGTG	GAGTCACAC	TAGCCATTG	TAGCATCCC
sp-21531	GCTCGTCTGGGCGAGGATAAACGACATTAGGCCCAGAGCGTCCCGGCAGCTGCCGGGGGTTGTA	ATGAA	TAACT	74	AAAGGGAGT	CATCCCTGA	CGTTACCAC	TTTCGCCTT
sp-21532	GCTCGTCTGGGCGAGGATAAACGACATTAGGCCCAGAGCGTCTTGGTCGGTATTACCGGCTGGGGGTTGTA	ATGAA	TAACT	81	TGATCAGAC	CATGTGCTG	CATAGAGCA	CCGGGTTTT
sp-21533	GCTCGTCTGGGCGAGGATAAACGACATTAGGCCCAGAGCGGCAGGGTTCTTCCCTGCGTTGTA	ATGAA	TAACT	73	GCAGGTAGA	AGTTAGTGC	CTACCGGAT	AAATCGACG
sp-21541	GCTCGTCTGGGCGAGGATAAACGGTGTTAGGCCCAGAGCGTCCCGGCAGCTGCCGGGGGTCACA	ATGAA	TTAAT	74	TAAATGGGG	GGAACTCTT	TCGTACTAC	CCATGCTCT
sp-21542	GCTCGTCTGGGCGAGGATAAACGGTGTTAGGCCCAGAGCGTCTTGGTCGGTATTACCGGCTGGGGGTCACA	ATGAA	TTAAT	81	GAAACTGCG	AAATCACCG	CATCATCCT	CTTCAAGCT
sp-21543	GCTCGTCTGGGCGAGGATAAACGGTGTTAGGCCCAGAGCGGCAGGGTTCTTCCCTGCGTCACA	ATGAA	TTAAT	73	CAGCAAACC	ACGGCTACT	GTCTTTAGG	AAGGTGTGC
sp-21551	GCTCGTCTGGGCGAGGATAAACGTTATTAGGCCCAGAGCGTCCCGGCAGCTGCCGGGGGTTAAC	ATGAA	TAATA	74	GAAGTGGTC	TGCCATCAG	CCTGACACA	CCCTTCTAT
sp-21552	GCTCGTCTGGGCGAGGATAAACGTTATTAGGCCCAGAGCGTCTTGGTCGGTATTACCGGCTGGGGGTTAAC	ATGAA	TAATA	81	GAGTTAACC	GCATAACAC	GAGGTCGTT	CCTTGACTA
sp-21553	GCTCGTCTGGGCGAGGATAAACGTTATTAGGCCCAGAGCGGCAGGGTTCTTCCCTGCGTTAAC	ATGAA	TAATA	73	TAGCGGATA	TAAAGGCGA	TTCCAGAAG	GTTTCGATC
sp-22111	GCTCGTCTGAGCGAGGATAAATAGTAATTAAGCTCAGAGCGTCCCGGCAGCTGCCGGGGGTTTAG	ATGAA	CAGTT	75	CGCCATGAA	TAGGCCATC	AAAAACCCC	AGGGGAACT
sp-22112	GCTCGTCTGAGCGAGGATAAATAGTAATTAAGCTCAGAGCGTCTTGGTCGGTATTACCGGCTGGGGGTTTAG	ATGAA	CAGTT	82	TCAGCAGTG	AGTTTCGGT	GTTTTACGC	TGGCTGTTT
sp-22113	GCTCGTCTGAGCGAGGATAAATAGTAATTAAGCTCAGAGCGGCAGGGTTCTTCCCTGCGTTTAG	ATGAA	CAGTT	74	TACGAACTG	CGCTGTAAT	CAGTACTTC	TGGCCAATG
sp-22121	GCTCGTCTGAGCGAGGATAAATAGGCTTTAAGCTCAGAGCGTCCCGGCAGCTGCCGGGGGTAGTC	ATGAA	AAAAA	75	CTATGCCAC	AGCTGAGGT	TTGCTGACA	CAGGTTCGA
sp-22122	GCTCGTCTGAGCGAGGATAAATAGGCTTTAAGCTCAGAGCGTCTTGGTCGGTATTACCGGCTGGGGGTAGTC	ATGAA	AAAAA	82	ATCATCCCA	GTCAGTGGA	GGATACATG	ACGAAGGGT
sp-22123	GCTCGTCTGAGCGAGGATAAATAGGCTTTAAGCTCAGAGCGGCAGGGTTCTTCCCTGCGTAGTC	ATGAA	AAAAA	74	GTCGTATTC	GTCTGTCTG	ATGCAAGCG	CTTGCTAAG
sp-22131	GCTCGTCTGAGCGAGGATAAATAGACATTAAGCTCAGAGCGTCCCGGCAGCTGCCGGGGGTTGTA	ATGAA	TAACT	75	TGATGGCAC	TGTGCCTTG	GACAAGGGA	AACGAGCCT
sp-22132	GCTCGTCTGAGCGAGGATAAATAGACATTAAGCTCAGAGCGTCTTGGTCGGTATTACCGGCTGGGGGTTGTA	ATGAA	TAACT	82	CGCCGTAAA	TCACTCTCT	CAATACTCG	CCGGCTATA
sp-22133	GCTCGTCTGAGCGAGGATAAATAGACATTAAGCTCAGAGCGGCAGGGTTCTTCCCTGCGTTGTA	ATGAA	TAACT	74	TTGGAGTCC	TCAATTCCG	AATGGTCGT	AGTTTCGCG
sp-22141	GCTCGTCTGAGCGAGGATAAATAGGTGTTAAGCTCAGAGCGTCCCGGCAGCTGCCGGGGGTCACA	ATGAA	TTAAT	75	GCCTAATGT	TGTGATAGG	AAGCCCTTA	TGGTTGGGT
sp-22142	GCTCGTCTGAGCGAGGATAAATAGGTGTTAAGCTCAGAGCGTCTTGGTCGGTATTACCGGCTGGGGGTCACA	ATGAA	TTAAT	82	ACGACAACC	ATCGGGCTT	TGTAATGCC	CACAGCTAG
sp-22143	GCTCGTCTGAGCGAGGATAAATAGGTGTTAAGCTCAGAGCGGCAGGGTTCTTCCCTGCGTCACA	ATGAA	TTAAT	74	GTATAGACC	TTGCACGCA	GAAGGAATC	AAACCCGGA
sp-22151	GCTCGTCTGAGCGAGGATAAATAGTTATTAAGCTCAGAGCGTCCCGGCAGCTGCCGGGGGTTAAC	ATGAA	TAATA	75	GTGAAGACG	TGCCGAAAA	CTAAGACGA	AAGGAAACG
sp-22152	GCTCGTCTGAGCGAGGATAAATAGTTATTAAGCTCAGAGCGTCTTGGTCGGTATTACCGGCTGGGGGTTAAC	ATGAA	TAATA	82	ACAAACGAG	ATCAGCCTT	TACGTCTGG	ACGCTAAGG
sp-22153	GCTCGTCTGAGCGAGGATAAATAGTTATTAAGCTCAGAGCGGCAGGGTTCTTCCCTGCGTTAAC	ATGAA	TAATA	74	ACGCAGATA	CACTGGTAC	AAGCATGGT	AGACGAAGT
sp-22211	GCTCGTCTGAGCGAGGATAAATAGGTAATTAAGCTCAGAGCGTCCCGGCAGCTGCCGGGGGTTTAG	ATGAA	CAGTT	76	ATCTCTTCG	GAATGAGTG	AGAAAGCTC	ATGGAAGAC
sp-22212	GCTCGTCTGAGCGAGGATAAATAGGTAATTAAGCTCAGAGCGTCTTGGTCGGTATTACCGGCTGGGGGTTTAG	ATGAA	CAGTT	83	CTCCTACTT	CTCAAAAGG	AGATCGTGT	GGCTTATCT
sp-22213	GCTCGTCTGAGCGAGGATAAATAGGTAATTAAGCTCAGAGCGGCAGGGTTCTTCCCTGCGTTTAG	ATGAA	CAGTT	75	AGCGGTTAA	CACCCGATT	GTAATGACC	GCGCTTAGA
sp-22221	GCTCGTCTGAGCGAGGATAAATAGGGCTTTAAGCTCAGAGCGTCCCGGCAGCTGCCGGGGGTAGTC	ATGAA	AAAAA	76	AGTGGGGTT	GGTGACTTC	TCGTACATG	CGATGGCTA
sp-22222	GCTCGTCTGAGCGAGGATAAATAGGGCTTTAAGCTCAGAGCGTCTTGGTCGGTATTACCGGCTGGGGGTAGTC	ATGAA	AAAAA	83	ATCAACGTG	CGAACTCGT	GACGCACAA	GGATTCGAG
sp-22223	GCTCGTCTGAGCGAGGATAAATAGGGCTTTAAGCTCAGAGCGGCAGGGTTCTTCCCTGCGTAGTC	ATGAA	AAAAA	75	AGAGAAACC	TCTACTAGC	TCAGAGGGA	CTTGAACGT
sp-22231	GCTCGTCTGAGCGAGGATAAATAGGACATTAAGCTCAGAGCGTCCCGGCAGCTGCCGGGGGTTGTA	ATGAA	TAACT	76	ACCCATTCC	TGTTGTACG	CTGTTCAGT	CACAGAAAG
sp-22232	GCTCGTCTGAGCGAGGATAAATAGGACATTAAGCTCAGAGCGTCTTGGTCGGTATTACCGGCTGGGGGTTGTA	ATGAA	TAACT	83	AACGAGAAG	GCCGCTTAA	CGTCAACAC	GGAGACAAA
sp-22233	GCTCGTCTGAGCGAGGATAAATAGGACATTAAGCTCAGAGCGGCAGGGTTCTTCCCTGCGTTGTA	ATGAA	TAACT	75	GAAGTGGAG	ATCAGGAAC	CGGTAATGC	TTGGGACGT
sp-22241	GCTCGTCTGAGCGAGGATAAATAGGGTGTTAAGCTCAGAGCGTCCCGGCAGCTGCCGGGGGTCACA	ATGAA	TTAAT	76	TCGCAATCC	GCTATGCAT	CTGTTTACG	TGATAGGAG
sp-22242	GCTCGTCTGAGCGAGGATAAATAGGGTGTTAAGCTCAGAGCGTCTTGGTCGGTATTACCGGCTGGGGGTCACA	ATGAA	TTAAT	83	CTGAGATCC	TTCCAGCTT	CACCTTACC	CGAATCCTC
sp-22243	GCTCGTCTGAGCGAGGATAAATAGGGTGTTAAGCTCAGAGCGGCAGGGTTCTTCCCTGCGTCACA	ATGAA	TTAAT	75	AACCAACAC	GTGTCAAGG	ATGTGCACC	TGAAGGAGT
sp-22251	GCTCGTCTGAGCGAGGATAAATAGGTTATTAAGCTCAGAGCGTCCCGGCAGCTGCCGGGGGTTAAC	ATGAA	TAATA	76	TAACTGAGG	CGATGGTAT	AGTGTACCG	CCTGTTTCA
sp-22252	GCTCGTCTGAGCGAGGATAAATAGGTTATTAAGCTCAGAGCGTCTTGGTCGGTATTACCGGCTGGGGGTTAAC	ATGAA	TAATA	83	GTAGTAACC	GCCCTCTTA	AGACTAGGC	CGGTACAAC
sp-22253	GCTCGTCTGAGCGAGGATAAATAGGTTATTAAGCTCAGAGCGGCAGGGTTCTTCCCTGCGTTAAC	ATGAA	TAATA	75	TCACTTCCA	TTTGCAGAG	GTTCCCATT	GATCCAGCT
sp-22311	GCTCGTCTGAGCGAGGGTAAATAGTAATTAAGCTCAGAGCGTCCCGGCAGCTGCCGGGGGTTTAG	ATGAA	CAGTT	75	AAACCTGTG	GCCTTGAAG	GTGAGGTTA	GCCAATTGT
sp-22312	GCTCGTCTGAGCGAGGGTAAATAGTAATTAAGCTCAGAGCGTCTTGGTCGGTATTACCGGCTGGGGGTTTAG	ATGAA	CAGTT	82	ACACACACC	GGTACTTGA	AGTCCCTAT	ACCATAGAC
sp-22313	GCTCGTCTGAGCGAGGGTAAATAGTAATTAAGCTCAGAGCGGCAGGGTTCTTCCCTGCGTTTAG	ATGAA	CAGTT	74	GTAGTGTCG	ATGCCCTAC	TGAGACCAG	ATTCGGCAT
sp-22321	GCTCGTCTGAGCGAGGGTAAATAGGCTTTAAGCTCAGAGCGTCCCGGCAGCTGCCGGGGGTAGTC	ATGAA	AAAAA	75	CTCTTCCGT	TGAGTACAG	CTCGCAACT	TGGAGGACT
sp-22322	GCTCGTCTGAGCGAGGGTAAATAGGCTTTAAGCTCAGAGCGTCTTGGTCGGTATTACCGGCTGGGGGTAGTC	ATGAA	AAAAA	82	TTGCGACAC	TCGAAAGCG	GTCACAACG	ACCGTTCAG
sp-22323	GCTCGTCTGAGCGAGGGTAAATAGGCTTTAAGCTCAGAGCGGCAGGGTTCTTCCCTGCGTAGTC	ATGAA	AAAAA	74	CCAACCTAG	ACTATTGGC	GCTTATCGA	AACATACGG
sp-22331	GCTCGTCTGAGCGAGGGTAAATAGACATTAAGCTCAGAGCGTCCCGGCAGCTGCCGGGGGTTGTA	ATGAA	TAACT	75	CTTTACCAG	CTCTATCCC	GCGCGATTA	GTAGGAACA
sp-22332	GCTCGTCTGAGCGAGGGTAAATAGACATTAAGCTCAGAGCGTCTTGGTCGGTATTACCGGCTGGGGGTTGTA	ATGAA	TAACT	82	CGCGATCAA	TAGTGACCC	CTACAAAGG	GGGATTCTA
sp-22333	GCTCGTCTGAGCGAGGGTAAATAGACATTAAGCTCAGAGCGGCAGGGTTCTTCCCTGCGTTGTA	ATGAA	TAACT	74	GGGAGACTA	TTAGACACG	ACCCCGATA	GTTGTTCCT
sp-22341	GCTCGTCTGAGCGAGGGTAAATAGGTGTTAAGCTCAGAGCGTCCCGGCAGCTGCCGGGGGTCACA	ATGAA	TTAAT	75	GCAGAGTAA	CAGATCTAC	GATGCTTCC	ATATGCCGT
sp-22342	GCTCGTCTGAGCGAGGGTAAATAGGTGTTAAGCTCAGAGCGTCTTGGTCGGTATTACCGGCTGGGGGTCACA	ATGAA	TTAAT	82	CTTCATGTG	AGGTCCGTT	TCCGGTAAT	CGACTACAG
sp-22343	GCTCGTCTGAGCGAGGGTAAATAGGTGTTAAGCTCAGAGCGGCAGGGTTCTTCCCTGCGTCACA	ATGAA	TTAAT	74	TTTCCTGTC	AGACACCCT	CTGATGCCA	AGTTTGACC
sp-22351	GCTCGTCTGAGCGAGGGTAAATAGTTATTAAGCTCAGAGCGTCCCGGCAGCTGCCGGGGGTTAAC	ATGAA	TAATA	75	CTCGCTAGA	AGAGTCACG	TCGGGCTTT	TTCATCGGA
sp-22352	GCTCGTCTGAGCGAGGGTAAATAGTTATTAAGCTCAGAGCGTCTTGGTCGGTATTACCGGCTGGGGGTTAAC	ATGAA	TAATA	82	TCAAGGGTT	TCCCATACC	GTTTCGTAG	GATCACGCA
sp-22353	GCTCGTCTGAGCGAGGGTAAATAGTTATTAAGCTCAGAGCGGCAGGGTTCTTCCCTGCGTTAAC	ATGAA	TAATA	74	GGGACTGTT	GAGGCTAAT	ACGCCTATT	GTCTACGTC
sp-22411	GCTCGTCTGAGCGAGGTTAAATAGTAATTAAGCTCAGAGCGTCCCGGCAGCTGCCGGGGGTTTAG	ATGAA	CAGTT	75	CCAGAAGAC	GCGCACTTA	CCGCAGATT	GATTTGAGC
sp-22412	GCTCGTCTGAGCGAGGTTAAATAGTAATTAAGCTCAGAGCGTCTTGGTCGGTATTACCGGCTGGGGGTTTAG	ATGAA	CAGTT	82	CGAACTTCC	CGGTCTAGT	GCTTCATCT	TCCTGTACT
sp-22413	GCTCGTCTGAGCGAGGTTAAATAGTAATTAAGCTCAGAGCGGCAGGGTTCTTCCCTGCGTTTAG	ATGAA	CAGTT	74	AGGTCACCA	CCAAGAAAG	TGTTTCGCT	CCAATGCAA
sp-22421	GCTCGTCTGAGCGAGGTTAAATAGGCTTTAAGCTCAGAGCGTCCCGGCAGCTGCCGGGGGTAGTC	ATGAA	AAAAA	75	TGTGGACAC	GCGTTTCCT	GGAAGATCA	TACAGTCCA
sp-22422	GCTCGTCTGAGCGAGGTTAAATAGGCTTTAAGCTCAGAGCGTCTTGGTCGGTATTACCGGCTGGGGGTAGTC	ATGAA	AAAAA	82	CAGACACCA	CTTAGCTAG	ATTTCAGCG	ACTCCAAGA
sp-22423	GCTCGTCTGAGCGAGGTTAAATAGGCTTTAAGCTCAGAGCGGCAGGGTTCTTCCCTGCGTAGTC	ATGAA	AAAAA	74	TCTCACGCA	CTACGTTCC	TTGACGAGG	GCATTGGCA
sp-22431	GCTCGTCTGAGCGAGGTTAAATAGACATTAAGCTCAGAGCGTCCCGGCAGCTGCCGGGGGTTGTA	ATGAA	TAACT	75	CAAACACAC	GCTACTGAA	GATATCTCG	AAAGACGTC
sp-22432	GCTCGTCTGAGCGAGGTTAAATAGACATTAAGCTCAGAGCGTCTTGGTCGGTATTACCGGCTGGGGGTTGTA	ATGAA	TAACT	82	GGAGTTCCA	CGTTTAACG	CACGGATAC	ACGATGTCA
sp-22433	GCTCGTCTGAGCGAGGTTAAATAGACATTAAGCTCAGAGCGGCAGGGTTCTTCCCTGCGTTGTA	ATGAA	TAACT	74	AGACTCCAC	GGTTAACGA	CGTTAGACC	GCAATCCTA
sp-22441	GCTCGTCTGAGCGAGGTTAAATAGGTGTTAAGCTCAGAGCGTCCCGGCAGCTGCCGGGGGTCACA	ATGAA	TTAAT	75	AAAGGCACG	AGCGTGACA	GTATCCTCT	AGGTGGTAC
sp-22442	GCTCGTCTGAGCGAGGTTAAATAGGTGTTAAGCTCAGAGCGTCTTGGTCGGTATTACCGGCTGGGGGTCACA	ATGAA	TTAAT	82	TTTCAAGGG	CACTAAGCT	CCGTGTCTA	ACAGGACTC
sp-22443	GCTCGTCTGAGCGAGGTTAAATAGGTGTTAAGCTCAGAGCGGCAGGGTTCTTCCCTGCGTCACA	ATGAA	TTAAT	74	TCGCAATGT	CCTTTGTCC	GTAACGCAC	GGATGTACG
sp-22451	GCTCGTCTGAGCGAGGTTAAATAGTTATTAAGCTCAGAGCGTCCCGGCAGCTGCCGGGGGTTAAC	ATGAA	TAATA	75	TTAGTCGTG	GCAAATCGC	GGTAATGCT	TGGCCTAGA
sp-22452	GCTCGTCTGAGCGAGGTTAAATAGTTATTAAGCTCAGAGCGTCTTGGTCGGTATTACCGGCTGGGGGTTAAC	ATGAA	TAATA	82	CTTCCAACC	GGACTAGAA	GAATACCGA	AGAATTGCG
sp-22453	GCTCGTCTGAGCGAGGTTAAATAGTTATTAAGCTCAGAGCGGCAGGGTTCTTCCCTGCGTTAAC	ATGAA	TAATA	74	AACAGCACA	AACGGTTGT	AGGGAATCT	TGCTCCCTT
sp-22511	GCTCGTCTGAGCGAGGATAAACGTAATTAAGCTCAGAGCGTCCCGGCAGCTGCCGGGGGTTTAG	ATGAA	CAGTT	74	TCTTCCTAG	TAGACCCTT	AAGATCGCT	CATTGTGAG
sp-22512	GCTCGTCTGAGCGAGGATAAACGTAATTAAGCTCAGAGCGTCTTGGTCGGTATTACCGGCTGGGGGTTTAG	ATGAA	CAGTT	81	TTGCTCAAG	CAGCAACAG	ACATTCGCA	TAAGTCGCA
sp-22513	GCTCGTCTGAGCGAGGATAAACGTAATTAAGCTCAGAGCGGCAGGGTTCTTCCCTGCGTTTAG	ATGAA	CAGTT	73	CACGATTTG	ATATGCTCC	TGGCTCTTG	TTGGGGTAC
sp-22521	GCTCGTCTGAGCGAGGATAAACGGCTTTAAGCTCAGAGCGTCCCGGCAGCTGCCGGGGGTAGTC	ATGAA	AAAAA	74	TTGCTAGGG	GAATGGCTT	CAGACATAG	TTACTCTGC
sp-22522	GCTCGTCTGAGCGAGGATAAACGGCTTTAAGCTCAGAGCGTCTTGGTCGGTATTACCGGCTGGGGGTAGTC	ATGAA	AAAAA	81	ATCGTCTGC	CCTCAGTGT	GGGTATTTG	TGATCGAAC
sp-22523	GCTCGTCTGAGCGAGGATAAACGGCTTTAAGCTCAGAGCGGCAGGGTTCTTCCCTGCGTAGTC	ATGAA	AAAAA	73	TCTTGAACC	CGAAGGGTT	TACTGCCTA	CCTTTCCGT
sp-22531	GCTCGTCTGAGCGAGGATAAACGACATTAAGCTCAGAGCGTCCCGGCAGCTGCCGGGGGTTGTA	ATGAA	TAACT	74	GTGGATGAA	GTTGCTCAG	GGAGTCTAT	GGTTGTCTG
sp-22532	GCTCGTCTGAGCGAGGATAAACGACATTAAGCTCAGAGCGTCTTGGTCGGTATTACCGGCTGGGGGTTGTA	ATGAA	TAACT	81	GTAGTTCAC	AGCTCGAGA	AAGTCCATC	GCAAACCTT
sp-22533	GCTCGTCTGAGCGAGGATAAACGACATTAAGCTCAGAGCGGCAGGGTTCTTCCCTGCGTTGTA	ATGAA	TAACT	73	CCACACGTT	GTACAGTGG	GACCCTGAA	TAGATGCCG
sp-22541	GCTCGTCTGAGCGAGGATAAACGGTGTTAAGCTCAGAGCGTCCCGGCAGCTGCCGGGGGTCACA	ATGAA	TTAAT	74	TCAAAGCCC	GTCACCCTT	CGCTGTATG	TCAGAGTAG
sp-22542	GCTCGTCTGAGCGAGGATAAACGGTGTTAAGCTCAGAGCGTCTTGGTCGGTATTACCGGCTGGGGGTCACA	ATGAA	TTAAT	81	GAGCCCTTT	CACGGAGTT	GAACCATGC	ATACGCTGG
sp-22543	GCTCGTCTGAGCGAGGATAAACGGTGTTAAGCTCAGAGCGGCAGGGTTCTTCCCTGCGTCACA	ATGAA	TTAAT	73	AATGCACGA	ATTCAGCTG	AAATCGAGC	CACCTAGTC
sp-22551	GCTCGTCTGAGCGAGGATAAACGTTATTAAGCTCAGAGCGTCCCGGCAGCTGCCGGGGGTTAAC	ATGAA	TAATA	74	GCTATCCTG	ATCTCCGGT	GAATAGGGA	CATCAGCTT
sp-22552	GCTCGTCTGAGCGAGGATAAACGTTATTAAGCTCAGAGCGTCTTGGTCGGTATTACCGGCTGGGGGTTAAC	ATGAA	TAATA	81	ACTTGTGTG	GCGATTATC	ATGAAGTGG	TCAGTGAAC
sp-22553	GCTCGTCTGAGCGAGGATAAACGTTATTAAGCTCAGAGCGGCAGGGTTCTTCCCTGCGTTAAC	ATGAA	TAATA	73	GACATTGCT	AATTGGCAG	ACACCGACA	TGGTAACTC
sp-23111	GCTCGTCATAGCGAGGATAAATAGTAATTAAGCTATGAGCGTCCCGGCAGCTGCCGGGGGTTTAG	ATGAA	CAGTT	75	CGTCTTTCC	GCTGCCTTT	GATAGCACA	CAGTAAGAC
sp-23112	GCTCGTCATAGCGAGGATAAATAGTAATTAAGCTATGAGCGTCTTGGTCGGTATTACCGGCTGGGGGTTTAG	ATGAA	CAGTT	82	CGCCATCTA	CTGCTATGG	CAATCCTTC	GCCGAATAA
sp-23113	GCTCGTCATAGCGAGGATAAATAGTAATTAAGCTATGAGCGGCAGGGTTCTTCCCTGCGTTTAG	ATGAA	CAGTT	74	CCACTTGTT	TTAGTGTGC	TAATCCTCG	CACCTTCAA
sp-23121	GCTCGTCATAGCGAGGATAAATAGGCTTTAAGCTATGAGCGTCCCGGCAGCTGCCGGGGGTAGTC	ATGAA	AAAAA	75	CGCTTAGAA	AAATGCCTC	GAGACGAAT	GCGAAGAAA
sp-23122	GCTCGTCATAGCGAGGATAAATAGGCTTTAAGCTATGAGCGTCTTGGTCGGTATTACCGGCTGGGGGTAGTC	ATGAA	AAAAA	82	CAACTCACA	TGTGGCATC	TGACCCATA	CGACATAGG
sp-23123	GCTCGTCATAGCGAGGATAAATAGGCTTTAAGCTATGAGCGGCAGGGTTCTTCCCTGCGTAGTC	ATGAA	AAAAA	74	GACTTGGGT	ATCGCACAG	TACGGACGT	AGAACACCG
sp-23131	GCTCGTCATAGCGAGGATAAATAGACATTAAGCTATGAGCGTCCCGGCAGCTGCCGGGGGTTGTA	ATGAA	TAACT	75	GACAACACT	AGTTGGAGA	ATGCTCGTT	TTAACCTCG
sp-23132	GCTCGTCATAGCGAGGATAAATAGACATTAAGCTATGAGCGTCTTGGTCGGTATTACCGGCTGGGGGTTGTA	ATGAA	TAACT	82	GTACCTTAG	TGGCCAGAA	AGCAGGAAG	TCACCTCTG
sp-23133	GCTCGTCATAGCGAGGATAAATAGACATTAAGCTATGAGCGGCAGGGTTCTTCCCTGCGTTGTA	ATGAA	TAACT	74	TAACAGCGC	GTACAGGAT	CCAAATGTG	AGCGGCATA
sp-23141	GCTCGTCATAGCGAGGATAAATAGGTGTTAAGCTATGAGCGTCCCGGCAGCTGCCGGGGGTCACA	ATGAA	TTAAT	75	ATTCACCGC	AGGCCTAAC	AACATCCGA	GTAGGTTCA
sp-23142	GCTCGTCATAGCGAGGATAAATAGGTGTTAAGCTATGAGCGTCTTGGTCGGTATTACCGGCTGGGGGTCACA	ATGAA	TTAAT	82	TGCCTATCA	GTTCAAGAG	GAGAGTCTC	ACCGCATGT
sp-23143	GCTCGTCATAGCGAGGATAAATAGGTGTTAAGCTATGAGCGGCAGGGTTCTTCCCTGCGTCACA	ATGAA	TTAAT	74	AGGTGCATA	GCACACTTG	CCATCGTGT	ATGGTGGTC
sp-23151	GCTCGTCATAGCGAGGATAAATAGTTATTAAGCTATGAGCGTCCCGGCAGCTGCCGGGGGTTAAC	ATGAA	TAATA	75	AGTCATTGG	CGTCCATTC	TCTTCGAGG	GCAAGATCG
sp-23152	GCTCGTCATAGCGAGGATAAATAGTTATTAAGCTATGAGCGTCTTGGTCGGTATTACCGGCTGGGGGTTAAC	ATGAA	TAATA	82	CTCTGCTGA	AACAGTCAG	AGTCGAGCA	CGTCAAGTA
sp-23153	GCTCGTCATAGCGAGGATAAATAGTTATTAAGCTATGAGCGGCAGGGTTCTTCCCTGCGTTAAC	ATGAA	TAATA	74	ACCATCGTC	TCGCTACTA	ACAGGCATG	GTTTACCTG
sp-23211	GCTCGTCATAGCGAGGATAAATAGGTAATTAAGCTATGAGCGTCCCGGCAGCTGCCGGGGGTTTAG	ATGAA	CAGTT	76	CGTCATACT	TAGCGCAGA	GGAAGCAAA	CGAAGATTG
sp-23212	GCTCGTCATAGCGAGGATAAATAGGTAATTAAGCTATGAGCGTCTTGGTCGGTATTACCGGCTGGGGGTTTAG	ATGAA	CAGTT	83	CGAATGACT	ACGCACCTA	GTTGCTGGT	CAACAGCTC
sp-23213	GCTCGTCATAGCGAGGATAAATAGGTAATTAAGCTATGAGCGGCAGGGTTCTTCCCTGCGTTTAG	ATGAA	CAGTT	75	GTACCGGAA	AGGTCTGGA	TGTGTGGGA	TGTAATGGG
sp-23221	GCTCGTCATAGCGAGGATAAATAGGGCTTTAAGCTATGAGCGTCCCGGCAGCTGCCGGGGGTAGTC	ATGAA	AAAAA	76	GACAGCTGA	ACCGCATTA	AGAGCTCGT	AACCTCCGT
sp-23222	GCTCGTCATAGCGAGGATAAATAGGGCTTTAAGCTATGAGCGTCTTGGTCGGTATTACCGGCTGGGGGTAGTC	ATGAA	AAAAA	83	TATGGAGGC	GATTGCAAC	CACAACGGT	ACGCCTTGT
sp-23223	GCTCGTCATAGCGAGGATAAATAGGGCTTTAAGCTATGAGCGGCAGGGTTCTTCCCTGCGTAGTC	ATGAA	AAAAA	75	AACACCCAG	AGTCCGGAA	CATCCTGTC	GACAAAAGC
sp-23231	GCTCGTCATAGCGAGGATAAATAGGACATTAAGCTATGAGCGTCCCGGCAGCTGCCGGGGGTTGTA	ATGAA	TAACT	76	TCTAGGTTG	CCTATTCAG	CGATACCAG	ATTTCGCTG
sp-23232	GCTCGTCATAGCGAGGATAAATAGGACATTAAGCTATGAGCGTCTTGGTCGGTATTACCGGCTGGGGGTTGTA	ATGAA	TAACT	83	TTTTGCGTC	CGAGCGTTT	TTCATCACG	CTCGTTACT
sp-23233	GCTCGTCATAGCGAGGATAAATAGGACATTAAGCTATGAGCGGCAGGGTTCTTCCCTGCGTTGTA	ATGAA	TAACT	75	GTTCGCTTA	GCCAATCAT	CACGTACAA	CACCAGTTT
sp-23241	GCTCGTCATAGCGAGGATAAATAGGGTGTTAAGCTATGAGCGTCCCGGCAGCTGCCGGGGGTCACA	ATGAA	TTAAT	76	GATGCGTAA	AGAGGACAC	TTCCACTGC	GAAAGCGGA
sp-23242	GCTCGTCATAGCGAGGATAAATAGGGTGTTAAGCTATGAGCGTCTTGGTCGGTATTACCGGCTGGGGGTCACA	ATGAA	TTAAT	83	TGAAGGCCT	AATCAGGTG	ACGGAGTCA	GAGCTTATC
sp-23243	GCTCGTCATAGCGAGGATAAATAGGGTGTTAAGCTATGAGCGGCAGGGTTCTTCCCTGCGTCACA	ATGAA	TTAAT	75	CTGCATTGA	ACCGCAATC	ATGTCGCAA	ACTGAGACG
sp-23251	GCTCGTCATAGCGAGGATAAATAGGTTATTAAGCTATGAGCGTCCCGGCAGCTGCCGGGGGTTAAC	ATGAA	TAATA	76	CGCTTTTCT	CCTCTGACT	TTGCAATGG	AACGGCTAC
sp-23252	GCTCGTCATAGCGAGGATAAATAGGTTATTAAGCTATGAGCGTCTTGGTCGGTATTACCGGCTGGGGGTTAAC	ATGAA	TAATA	83	GCCTACAAT	AGGTGACTA	AAGGCAGAC	GCAGAAGGT
sp-23253	GCTCGTCATAGCGAGGATAAATAGGTTATTAAGCTATGAGCGGCAGGGTTCTTCCCTGCGTTAAC	ATGAA	TAATA	75	CTATGCCGA	ACACTACAC	GGCGAGTAA	GTGTCGTGT
sp-23311	GCTCGTCATAGCGAGGGTAAATAGTAATTAAGCTATGAGCGTCCCGGCAGCTGCCGGGGGTTTAG	ATGAA	CAGTT	75	AGAGCTTCA	GAGCCAAGA	TGCCTACGT	GTAACACCG
sp-23312	GCTCGTCATAGCGAGGGTAAATAGTAATTAAGCTATGAGCGTCTTGGTCGGTATTACCGGCTGGGGGTTTAG	ATGAA	CAGTT	82	GTTGCAAAG	AAGCATGTC	GTCAGTCTT	CAGGTTAGC
sp-23313	GCTCGTCATAGCGAGGGTAAATAGTAATTAAGCTATGAGCGGCAGGGTTCTTCCCTGCGTTTAG	ATGAA	CAGTT	74	TACAGCAGG	CATAAGGTG	CGACATTGA	GGTAAGACT
sp-23321	GCTCGTCATAGCGAGGGTAAATAGGCTTTAAGCTATGAGCGTCCCGGCAGCTGCCGGGGGTAGTC	ATGAA	AAAAA	75	AGGAAAGCT	AGCTTTCCC	CCACAAGTA	AATCCCTGT
sp-23322	GCTCGTCATAGCGAGGGTAAATAGGCTTTAAGCTATGAGCGTCTTGGTCGGTATTACCGGCTGGGGGTAGTC	ATGAA	AAAAA	82	CCGCTAACA	GAGACAAGG	CGGAAATCC	ATCAGACGA
sp-23323	GCTCGTCATAGCGAGGGTAAATAGGCTTTAAGCTATGAGCGGCAGGGTTCTTCCCTGCGTAGTC	ATGAA	AAAAA	74	CGATTGAAC	ATCGTTCAC	TTCAACAGC	TTCGTTGGA
sp-23331	GCTCGTCATAGCGAGGGTAAATAGACATTAAGCTATGAGCGTCCCGGCAGCTGCCGGGGGTTGTA	ATGAA	TAACT	75	CAGATGTCC	ACGTGCTCT	CTAGATTGC	TGTCAGAAG
sp-23332	GCTCGTCATAGCGAGGGTAAATAGACATTAAGCTATGAGCGTCTTGGTCGGTATTACCGGCTGGGGGTTGTA	ATGAA	TAACT	82	TACTCGAAC	CCTTTGTGT	AAGCACGTG	TCGGAGAGA
sp-23333	GCTCGTCATAGCGAGGGTAAATAGACATTAAGCTATGAGCGGCAGGGTTCTTCCCTGCGTTGTA	ATGAA	TAACT	74	GCATCTGAC	GCAGTAGCT	TTCGTCTAC	TTACACCCG
sp-23341	GCTCGTCATAGCGAGGGTAAATAGGTGTTAAGCTATGAGCGTCCCGGCAGCTGCCGGGGGTCACA	ATGAA	TTAAT	75	CACTGGGTA	AGATTTCGC	GCCTCGATA	TTGGCGAAG
sp-23342	GCTCGTCATAGCGAGGGTAAATAGGTGTTAAGCTATGAGCGTCTTGGTCGGTATTACCGGCTGGGGGTCACA	ATGAA	TTAAT	82	TAGTAGCGA	TGCAGATCT	ACACTGAGA	CGATCGCAT
sp-23343	GCTCGTCATAGCGAGGGTAAATAGGTGTTAAGCTATGAGCGGCAGGGTTCTTCCCTGCGTCACA	ATGAA	TTAAT	74	AGGTGCTTG	TCGAACTGC	TGGACTACC	GGAAGGATT
sp-23351	GCTCGTCATAGCGAGGGTAAATAGTTATTAAGCTATGAGCGTCCCGGCAGCTGCCGGGGGTTAAC	ATGAA	TAATA	75	AGGGATATG	TTCCTTGTC	GAGGAAGGT	AATACCCCC
sp-23352	GCTCGTCATAGCGAGGGTAAATAGTTATTAAGCTATGAGCGTCTTGGTCGGTATTACCGGCTGGGGGTTAAC	ATGAA	TAATA	82	AACCGGAAA	GAATCCGAT	AGATGGGTT	TACGTCAAG
sp-23353	GCTCGTCATAGCGAGGGTAAATAGTTATTAAGCTATGAGCGGCAGGGTTCTTCCCTGCGTTAAC	ATGAA	TAATA	74	CTTAGGGCT	AGTTGCGAA	TTGGCTACG	CACAACAAG
sp-23411	GCTCGTCATAGCGAGGTTAAATAGTAATTAAGCTATGAGCGTCCCGGCAGCTGCCGGGGGTTTAG	ATGAA	CAGTT	75	TTGGAAGGG	TCTTAGGTC	GTCCCGTAT	GCCTAATCG
sp-23412	GCTCGTCATAGCGAGGTTAAATAGTAATTAAGCTATGAGCGTCTTGGTCGGTATTACCGGCTGGGGGTTTAG	ATGAA	CAGTT	82	AGCTGTTAG	CGGCTAATG	GGAAAGAAC	TCCACACAT
sp-23413	GCTCGTCATAGCGAGGTTAAATAGTAATTAAGCTATGAGCGGCAGGGTTCTTCCCTGCGTTTAG	ATGAA	CAGTT	74	TCCACATGT	CTCCCTTTT	TGGATACGC	GTCGGTACA
sp-23421	GCTCGTCATAGCGAGGTTAAATAGGCTTTAAGCTATGAGCGTCCCGGCAGCTGCCGGGGGTAGTC	ATGAA	AAAAA	75	GTGTAGGGT	GCTTGTCTC	TGACCTAAC	GCCACTATG
sp-23422	GCTCGTCATAGCGAGGTTAAATAGGCTTTAAGCTATGAGCGTCTTGGTCGGTATTACCGGCTGGGGGTAGTC	ATGAA	AAAAA	82	TTCGGTTTG	ATAGGACTG	CTAATGTCG	TAAGTGCGC
sp-23423	GCTCGTCATAGCGAGGTTAAATAGGCTTTAAGCTATGAGCGGCAGGGTTCTTCCCTGCGTAGTC	ATGAA	AAAAA	74	TGTTGCACC	GCCTATCCA	ACTTCTCGA	TTGTGAGCG
sp-23431	GCTCGTCATAGCGAGGTTAAATAGACATTAAGCTATGAGCGTCCCGGCAGCTGCCGGGGGTTGTA	ATGAA	TAACT	75	CATAGGCAT	TAGCCAGGT	CCAACATCC	GTTTGGGGA
sp-23432	GCTCGTCATAGCGAGGTTAAATAGACATTAAGCTATGAGCGTCTTGGTCGGTATTACCGGCTGGGGGTTGTA	ATGAA	TAACT	82	CTTTCGGCT	CAACGCTTG	TGCCACATA	TCGGACAAT
sp-23433	GCTCGTCATAGCGAGGTTAAATAGACATTAAGCTATGAGCGGCAGGGTTCTTCCCTGCGTTGTA	ATGAA	TAACT	74	GGCGGATAA	TGGTTACAC	TACGAGGTA	CGATTCGAC
sp-23441	GCTCGTCATAGCGAGGTTAAATAGGTGTTAAGCTATGAGCGTCCCGGCAGCTGCCGGGGGTCACA	ATGAA	TTAAT	75	TGTCTCTGT	TGGACACAG	AGCGATACT	TCGTTCTGC
sp-23442	GCTCGTCATAGCGAGGTTAAATAGGTGTTAAGCTATGAGCGTCTTGGTCGGTATTACCGGCTGGGGGTCACA	ATGAA	TTAAT	82	TCACTAGCC	ACGAATGCT	AGATGTTCG	GCAATGTGC
sp-23443	GCTCGTCATAGCGAGGTTAAATAGGTGTTAAGCTATGAGCGGCAGGGTTCTTCCCTGCGTCACA	ATGAA	TTAAT	74	GGATGGCAT	TGCTGCAAT	GCTACAGTA	ATTCCTCGG
sp-23451	GCTCGTCATAGCGAGGTTAAATAGTTATTAAGCTATGAGCGTCCCGGCAGCTGCCGGGGGTTAAC	ATGAA	TAATA	75	GTTAGGTGA	TACACTCGC	GAAGTGACC	CGATAGTGA
sp-23452	GCTCGTCATAGCGAGGTTAAATAGTTATTAAGCTATGAGCGTCTTGGTCGGTATTACCGGCTGGGGGTTAAC	ATGAA	TAATA	82	TGCGTTTAC	TACCACGAA	TAGTGACGA	AATGACCCC
sp-23453	GCTCGTCATAGCGAGGTTAAATAGTTATTAAGCTATGAGCGGCAGGGTTCTTCCCTGCGTTAAC	ATGAA	TAATA	74	CGCTCATGA	TGCTGGCTT	ACCACGCAT	CTTGCGATT
sp-23511	GCTCGTCATAGCGAGGATAAACGTAATTAAGCTATGAGCGTCCCGGCAGCTGCCGGGGGTTTAG	ATGAA	CAGTT	74	AGATGCATC	AGCACGATT	ACTAGACGC	TCATACGAG
sp-23512	GCTCGTCATAGCGAGGATAAACGTAATTAAGCTATGAGCGTCTTGGTCGGTATTACCGGCTGGGGGTTTAG	ATGAA	CAGTT	81	ACCCCGTTT	GTGGCTAGA	CTGAAGAGC	ACACTGTCC
sp-23513	GCTCGTCATAGCGAGGATAAACGTAATTAAGCTATGAGCGGCAGGGTTCTTCCCTGCGTTTAG	ATGAA	CAGTT	73	TCCCTTAGA	GCCGGAATA	ATGTTACCC	GTTGCCGAT
sp-23521	GCTCGTCATAGCGAGGATAAACGGCTTTAAGCTATGAGCGTCCCGGCAGCTGCCGGGGGTAGTC	ATGAA	AAAAA	74	TCGGTGACA	CAGGAAATG	CTGTCGTTA	TTCCATCGT
sp-23522	GCTCGTCATAGCGAGGATAAACGGCTTTAAGCTATGAGCGTCTTGGTCGGTATTACCGGCTGGGGGTAGTC	ATGAA	AAAAA	81	CAAGTCGGT	GATGAATGC	GTGCGTAAA	ATCTTAGGC
sp-23523	GCTCGTCATAGCGAGGATAAACGGCTTTAAGCTATGAGCGGCAGGGTTCTTCCCTGCGTAGTC	ATGAA	AAAAA	73	CTGTGAGAG	ATGCAGGGT	CAAAGCAGG	TGCTTCATC
sp-23531	GCTCGTCATAGCGAGGATAAACGACATTAAGCTATGAGCGTCCCGGCAGCTGCCGGGGGTTGTA	ATGAA	TAACT	74	GAGTGTTCG	GATAGTGAC	TTCTGACGG	GTTAGCCAC
sp-23532	GCTCGTCATAGCGAGGATAAACGACATTAAGCTATGAGCGTCTTGGTCGGTATTACCGGCTGGGGGTTGTA	ATGAA	TAACT	81	TACTCCATC	ATCGACGAG	ACTATGACC	GTCCCTACA
sp-23533	GCTCGTCATAGCGAGGATAAACGACATTAAGCTATGAGCGGCAGGGTTCTTCCCTGCGTTGTA	ATGAA	TAACT	73	GTCTGAACA	ATATGGCCA	TCCTTTGGG	CTTTCATCC
sp-23541	GCTCGTCATAGCGAGGATAAACGGTGTTAAGCTATGAGCGTCCCGGCAGCTGCCGGGGGTCACA	ATGAA	TTAAT	74	TACTAGGGA	CTTAGAGGA	CTAGTATCG	CACGAGCTA
sp-23542	GCTCGTCATAGCGAGGATAAACGGTGTTAAGCTATGAGCGTCTTGGTCGGTATTACCGGCTGGGGGTCACA	ATGAA	TTAAT	81	AAAGGGTCC	CAGTCATTG	CCAGTCCTT	TTTGCTGCT
sp-23543	GCTCGTCATAGCGAGGATAAACGGTGTTAAGCTATGAGCGGCAGGGTTCTTCCCTGCGTCACA	ATGAA	TTAAT	73	TTGTGCTGT	GTAGCTCTA	GATTATGGC	AGCATTTCG
sp-23551	GCTCGTCATAGCGAGGATAAACGTTATTAAGCTATGAGCGTCCCGGCAGCTGCCGGGGGTTAAC	ATGAA	TAATA	74	CGTTTGAGA	ACGCACATT	GTCTAAGAG	GCTGGTTTA
sp-23552	GCTCGTCATAGCGAGGATAAACGTTATTAAGCTATGAGCGTCTTGGTCGGTATTACCGGCTGGGGGTTAAC	ATGAA	TAATA	81	TCACGAATG	TGGGAGCAA	CAACTCGAA	ACAGTATCC
sp-23553	GCTCGTCATAGCGAGGATAAACGTTATTAAGCTATGAGCGGCAGGGTTCTTCCCTGCGTTAAC	ATGAA	TAATA	73	TAACACCCA	CTCAGAACC	TGATGCAGT	TGGACAAGC
sp-24111	GCTCGACTAAGCGAGGATAAATAGTAATTAGGCTTAGAGCGTCCCGGCAGCTGCCGGGGGTTTAG	ATGAA	CAGTT	75	GGTACAAGT	TTACTGTCC	AGGGTTGTT	CAACGGTGT
sp-24112	GCTCGACTAAGCGAGGATAAATAGTAATTAGGCTTAGAGCGTCTTGGTCGGTATTACCGGCTGGGGGTTTAG	ATGAA	CAGTT	82	TGCACATCC	AGATTGCGA	TTCGGTTGC	ACTAGTCTG
sp-24113	GCTCGACTAAGCGAGGATAAATAGTAATTAGGCTTAGAGCGGCAGGGTTCTTCCCTGCGTTTAG	ATGAA	CAGTT	74	GGTAATAGG	GAGACACTT	TGTCTAGCC	CTGACGCTA
sp-24121	GCTCGACTAAGCGAGGATAAATAGGCTTTAGGCTTAGAGCGTCCCGGCAGCTGCCGGGGGTAGTC	ATGAA	AAAAA	75	GTCTAGGAC	GTTTACTGG	TGGCAGGTT	ATCCGCAAT
sp-24122	GCTCGACTAAGCGAGGATAAATAGGCTTTAGGCTTAGAGCGTCTTGGTCGGTATTACCGGCTGGGGGTAGTC	ATGAA	AAAAA	82	GACGGGAAA	GTAAGAGTC	GCTGGGAAA	ATAGCAGAG
sp-24123	GCTCGACTAAGCGAGGATAAATAGGCTTTAGGCTTAGAGCGGCAGGGTTCTTCCCTGCGTAGTC	ATGAA	AAAAA	74	TAGCAGGAC	ACCTATCGG	GCTTTGAGA	ACATCCGAC
sp-24131	GCTCGACTAAGCGAGGATAAATAGACATTAGGCTTAGAGCGTCCCGGCAGCTGCCGGGGGTTGTA	ATGAA	TAACT	75	TCCGTATAG	TAAGCGTCA	TCCACCGTT	TGGCAAGCT
sp-24132	GCTCGACTAAGCGAGGATAAATAGACATTAGGCTTAGAGCGTCTTGGTCGGTATTACCGGCTGGGGGTTGTA	ATGAA	TAACT	82	ACATGGTGA	GGCAGATTG	CTCTGCGAT	GTCCATTCG
sp-24133	GCTCGACTAAGCGAGGATAAATAGACATTAGGCTTAGAGCGGCAGGGTTCTTCCCTGCGTTGTA	ATGAA	TAACT	74	GTATGACTC	CACTGGTCT	GGGAATCGA	TTTTGGCGT
sp-24141	GCTCGACTAAGCGAGGATAAATAGGTGTTAGGCTTAGAGCGTCCCGGCAGCTGCCGGGGGTCACA	ATGAA	TTAAT	75	ATTGGGACA	TCTGGTGCA	TGCCGGTTT	GAGAATCAG
sp-24142	GCTCGACTAAGCGAGGATAAATAGGTGTTAGGCTTAGAGCGTCTTGGTCGGTATTACCGGCTGGGGGTCACA	ATGAA	TTAAT	82	CCCCACATA	CTGCTGGAA	AGCTAACGA	TGCACCAGA
sp-24143	GCTCGACTAAGCGAGGATAAATAGGTGTTAGGCTTAGAGCGGCAGGGTTCTTCCCTGCGTCACA	ATGAA	TTAAT	74	CCACCTATC	CAGTCTAGG	CATGTACCT	CGGCTCATA
sp-24151	GCTCGACTAAGCGAGGATAAATAGTTATTAGGCTTAGAGCGTCCCGGCAGCTGCCGGGGGTTAAC	ATGAA	TAATA	75	GCTCTGAGT	GTCTTAGGG	AACGTGCCA	GGGTGCTAT
sp-24152	GCTCGACTAAGCGAGGATAAATAGTTATTAGGCTTAGAGCGTCTTGGTCGGTATTACCGGCTGGGGGTTAAC	ATGAA	TAATA	82	CGCATACAC	CTTTGTGAC	CTTTAGGCA	GAATCCAGT
sp-24153	GCTCGACTAAGCGAGGATAAATAGTTATTAGGCTTAGAGCGGCAGGGTTCTTCCCTGCGTTAAC	ATGAA	TAATA	74	CCCTAGATC	TGTTACGGT	GCCCTCAAT	ACAAGTGCG
sp-24211	GCTCGACTAAGCGAGGATAAATAGGTAATTAGGCTTAGAGCGTCCCGGCAGCTGCCGGGGGTTTAG	ATGAA	CAGTT	76	GATGTTCGT	CACTTGGCA	GCACTAAGG	CCATGTGGA
sp-24212	GCTCGACTAAGCGAGGATAAATAGGTAATTAGGCTTAGAGCGTCTTGGTCGGTATTACCGGCTGGGGGTTTAG	ATGAA	CAGTT	83	GACTAACGG	AGCCGGATT	TTTCCGCGT	ATGGTTGTG
sp-24213	GCTCGACTAAGCGAGGATAAATAGGTAATTAGGCTTAGAGCGGCAGGGTTCTTCCCTGCGTTTAG	ATGAA	CAGTT	75	CTCTCGAGT	CGTACGCTA	TCGGAAGGT	GAATGATCG
sp-24221	GCTCGACTAAGCGAGGATAAATAGGGCTTTAGGCTTAGAGCGTCCCGGCAGCTGCCGGGGGTAGTC	ATGAA	AAAAA	76	ACCAGAGGA	TGAGCAGGA	GGGTTTCAG	CAAAGCTGA
sp-24222	GCTCGACTAAGCGAGGATAAATAGGGCTTTAGGCTTAGAGCGTCTTGGTCGGTATTACCGGCTGGGGGTAGTC	ATGAA	AAAAA	83	TTGCTTCCG	TTCGGTGTT	AGTGAGAAC	CAGATTCAG
sp-24223	GCTCGACTAAGCGAGGATAAATAGGGCTTTAGGCTTAGAGCGGCAGGGTTCTTCCCTGCGTAGTC	ATGAA	AAAAA	75	TCGTCACCA	GCTTTAGCA	AGCCATCAC	TCCCGCTTT
sp-24231	GCTCGACTAAGCGAGGATAAATAGGACATTAGGCTTAGAGCGTCCCGGCAGCTGCCGGGGGTTGTA	ATGAA	TAACT	76	TGGTGTTAC	AATGTAGGC	GGTTAGGCA	ACTGTGCCA
sp-24232	GCTCGACTAAGCGAGGATAAATAGGACATTAGGCTTAGAGCGTCTTGGTCGGTATTACCGGCTGGGGGTTGTA	ATGAA	TAACT	83	TGTTAGCTC	AGCATTCGC	GACAAGGAT	TATGCGCAA
sp-24233	GCTCGACTAAGCGAGGATAAATAGGACATTAGGCTTAGAGCGGCAGGGTTCTTCCCTGCGTTGTA	ATGAA	TAACT	75	CTATGCGTG	GATGTACGA	TGCGTTCGT	ATTGCCTGC
sp-24241	GCTCGACTAAGCGAGGATAAATAGGGTGTTAGGCTTAGAGCGTCCCGGCAGCTGCCGGGGGTCACA	ATGAA	TTAAT	76	TGGATACCG	TGCTATCCA	CACACTTCG	TGCCACCAA
sp-24242	GCTCGACTAAGCGAGGATAAATAGGGTGTTAGGCTTAGAGCGTCTTGGTCGGTATTACCGGCTGGGGGTCACA	ATGAA	TTAAT	83	TTGGTTAGC	CTAGTCCCT	ATCCGTGAG	TGCACTACT
sp-24243	GCTCGACTAAGCGAGGATAAATAGGGTGTTAGGCTTAGAGCGGCAGGGTTCTTCCCTGCGTCACA	ATGAA	TTAAT	75	AGTCAGCAC	CCACGAATA	CTGATTGAG	GCTTGTGAT
sp-24251	GCTCGACTAAGCGAGGATAAATAGGTTATTAGGCTTAGAGCGTCCCGGCAGCTGCCGGGGGTTAAC	ATGAA	TAATA	76	AGAAAGCGA	GCAAGAAAC	TCGTCTTCA	CTTGGATCT
sp-24252	GCTCGACTAAGCGAGGATAAATAGGTTATTAGGCTTAGAGCGTCTTGGTCGGTATTACCGGCTGGGGGTTAAC	ATGAA	TAATA	83	TCGTGATGT	TACTTGCGA	CGTACACAC	GCTATGTTG
sp-24253	GCTCGACTAAGCGAGGATAAATAGGTTATTAGGCTTAGAGCGGCAGGGTTCTTCCCTGCGTTAAC	ATGAA	TAATA	75	AGTCGTCTG	GAACGTTGT	AGGCTTACA	TGCCCTTGT
sp-24311	GCTCGACTAAGCGAGGGTAAATAGTAATTAGGCTTAGAGCGTCCCGGCAGCTGCCGGGGGTTTAG	ATGAA	CAGTT	75	GTGAATGCC	CAAGTACGC	GCATCTGGA	ACTGTCAGT
sp-24312	GCTCGACTAAGCGAGGGTAAATAGTAATTAGGCTTAGAGCGTCTTGGTCGGTATTACCGGCTGGGGGTTTAG	ATGAA	CAGTT	82	GAGTGGTCA	ATCGAGCTC	CGTGTAGTC	CAGAATGGC
sp-24313	GCTCGACTAAGCGAGGGTAAATAGTAATTAGGCTTAGAGCGGCAGGGTTCTTCCCTGCGTTTAG	ATGAA	CAGTT	74	GATGACACG	CCAAGTCTG	GTCGTGGTA	AATGGAACC
sp-24321	GCTCGACTAAGCGAGGGTAAATAGGCTTTAGGCTTAGAGCGTCCCGGCAGCTGCCGGGGGTAGTC	ATGAA	AAAAA	75	TCGGGAACT	GGTAGTCTA	AACCTGCGA	ATTCAGGAG
sp-24322	GCTCGACTAAGCGAGGGTAAATAGGCTTTAGGCTTAGAGCGTCTTGGTCGGTATTACCGGCTGGGGGTAGTC	ATGAA	AAAAA	82	TGAACTAGG	ATCCCTTCA	GAGCTTGGA	TCCCACTAT
sp-24323	GCTCGACTAAGCGAGGGTAAATAGGCTTTAGGCTTAGAGCGGCAGGGTTCTTCCCTGCGTAGTC	ATGAA	AAAAA	74	GTCTTTACC	CAAAGACAG	GATTAACGC	TGGGTCATA
sp-24331	GCTCGACTAAGCGAGGGTAAATAGACATTAGGCTTAGAGCGTCCCGGCAGCTGCCGGGGGTTGTA	ATGAA	TAACT	75	GTTGCACAA	CCACATAAC	TCGCATGCT	CTCCAGCAT
sp-24332	GCTCGACTAAGCGAGGGTAAATAGACATTAGGCTTAGAGCGTCTTGGTCGGTATTACCGGCTGGGGGTTGTA	ATGAA	TAACT	82	ACCCTCCAA	TTGAGCGAA	AGCTACTTG	GACTCGTTA
sp-24333	GCTCGACTAAGCGAGGGTAAATAGACATTAGGCTTAGAGCGGCAGGGTTCTTCCCTGCGTTGTA	ATGAA	TAACT	74	CCGAATTGT	CGCCTGATT	TCTAACTGG	GGTCCTTAC
sp-24341	GCTCGACTAAGCGAGGGTAAATAGGTGTTAGGCTTAGAGCGTCCCGGCAGCTGCCGGGGGTCACA	ATGAA	TTAAT	75	GCGTTGCTA	AACCACCGA	ATCGTCACA	ATGTCGTCT
sp-24342	GCTCGACTAAGCGAGGGTAAATAGGTGTTAGGCTTAGAGCGTCTTGGTCGGTATTACCGGCTGGGGGTCACA	ATGAA	TTAAT	82	GGCTGAAAG	CGTCCCATA	ACGTTTGCG	CTTTCAACG
sp-24343	GCTCGACTAAGCGAGGGTAAATAGGTGTTAGGCTTAGAGCGGCAGGGTTCTTCCCTGCGTCACA	ATGAA	TTAAT	74	ACTATCCTC	ATGAGGAAG	CCATAGCCA	GATTCACGA
sp-24351	GCTCGACTAAGCGAGGGTAAATAGTTATTAGGCTTAGAGCGTCCCGGCAGCTGCCGGGGGTTAAC	ATGAA	TAATA	75	AAGACACCG	TCCACCTTC	TGTGGAGGT	GGAAATGGA
sp-24352	GCTCGACTAAGCGAGGGTAAATAGTTATTAGGCTTAGAGCGTCTTGGTCGGTATTACCGGCTGGGGGTTAAC	ATGAA	TAATA	82	TGGATGCCT	TAACCACAG	ATATCAGCC	GACTAGTCT
sp-24353	GCTCGACTAAGCGAGGGTAAATAGTTATTAGGCTTAGAGCGGCAGGGTTCTTCCCTGCGTTAAC	ATGAA	TAATA	74	TGAGCGATC	ATTCTGGTG	AGACGGCTA	GAATTAGCG
sp-24411	GCTCGACTAAGCGAGGTTAAATAGTAATTAGGCTTAGAGCGTCCCGGCAGCTGCCGGGGGTTTAG	ATGAA	CAGTT	75	CTAGCCATG	CCTTTGCCT	CGTGTAAGA	TGATCGTGA
sp-24412	GCTCGACTAAGCGAGGTTAAATAGTAATTAGGCTTAGAGCGTCTTGGTCGGTATTACCGGCTGGGGGTTTAG	ATGAA	CAGTT	82	CTTGACTGC	TCAAGCCAA	GCTCACTTT	CTAATGCCT
sp-24413	GCTCGACTAAGCGAGGTTAAATAGTAATTAGGCTTAGAGCGGCAGGGTTCTTCCCTGCGTTTAG	ATGAA	CAGTT	74	AGGGTGCTA	CAGTACTGT	ATGCTCAGG	GACACCGAT
sp-24421	GCTCGACTAAGCGAGGTTAAATAGGCTTTAGGCTTAGAGCGTCCCGGCAGCTGCCGGGGGTAGTC	ATGAA	AAAAA	75	ATTCGTAGC	CAACCCTCA	TCCCTTAAG	AGCGCTCTA
sp-24422	GCTCGACTAAGCGAGGTTAAATAGGCTTTAGGCTTAGAGCGTCTTGGTCGGTATTACCGGCTGGGGGTAGTC	ATGAA	AAAAA	82	GAAATGGGT	TGCGAAAGA	GACACAATG	AGGGTCATG
sp-24423	GCTCGACTAAGCGAGGTTAAATAGGCTTTAGGCTTAGAGCGGCAGGGTTCTTCCCTGCGTAGTC	ATGAA	AAAAA	74	CAAAACCGT	GGAAGAAGA	GCGTAACGT	CTTCTACTG
sp-24431	GCTCGACTAAGCGAGGTTAAATAGACATTAGGCTTAGAGCGTCCCGGCAGCTGCCGGGGGTTGTA	ATGAA	TAACT	75	CGCATATGG	CGAAAGTCA	CTGGGCAAT	CAGGTCTAG
sp-24432	GCTCGACTAAGCGAGGTTAAATAGACATTAGGCTTAGAGCGTCTTGGTCGGTATTACCGGCTGGGGGTTGTA	ATGAA	TAACT	82	GTCGTTAAG	TAGTATGGG	TGTCAGGAC	CCTGACTGT
sp-24433	GCTCGACTAAGCGAGGTTAAATAGACATTAGGCTTAGAGCGGCAGGGTTCTTCCCTGCGTTGTA	ATGAA	TAACT	74	TCGCTGAAA	CTCTACAGA	GACTTGTTC	ATCTGTTGC
sp-24441	GCTCGACTAAGCGAGGTTAAATAGGTGTTAGGCTTAGAGCGTCCCGGCAGCTGCCGGGGGTCACA	ATGAA	TTAAT	75	GCTATTACC	GCTGTACTC	TCAGGTTCT	TTTCGGACG
sp-24442	GCTCGACTAAGCGAGGTTAAATAGGTGTTAGGCTTAGAGCGTCTTGGTCGGTATTACCGGCTGGGGGTCACA	ATGAA	TTAAT	82	GGCCCATAA	TAACACACG	TTAGCGAGG	CGCAATAGT
sp-24443	GCTCGACTAAGCGAGGTTAAATAGGTGTTAGGCTTAGAGCGGCAGGGTTCTTCCCTGCGTCACA	ATGAA	TTAAT	74	GTAGCTTGT	CAGTGTCAA	TACTGCACT	CAGGAATAG
sp-24451	GCTCGACTAAGCGAGGTTAAATAGTTATTAGGCTTAGAGCGTCCCGGCAGCTGCCGGGGGTTAAC	ATGAA	TAATA	75	TTGTGTGGA	CGCTACTAA	TACGCTAAC	GAGACCAGA
sp-24452	GCTCGACTAAGCGAGGTTAAATAGTTATTAGGCTTAGAGCGTCTTGGTCGGTATTACCGGCTGGGGGTTAAC	ATGAA	TAATA	82	TCTAGGACA	GAACTATCG	GTCCGAATA	GGTACCCAT
sp-24453	GCTCGACTAAGCGAGGTTAAATAGTTATTAGGCTTAGAGCGGCAGGGTTCTTCCCTGCGTTAAC	ATGAA	TAATA	74	ATGAGCGAG	ATGCGCTGT	CTGTAACGT	TCTAGGTGA
sp-24511	GCTCGACTAAGCGAGGATAAACGTAATTAGGCTTAGAGCGTCCCGGCAGCTGCCGGGGGTTTAG	ATGAA	CAGTT	74	TTGTTCGCT	TATGACGGT	CGACTCTTT	ATAAGCCGA
sp-24512	GCTCGACTAAGCGAGGATAAACGTAATTAGGCTTAGAGCGTCTTGGTCGGTATTACCGGCTGGGGGTTTAG	ATGAA	CAGTT	81	GCTAGGTAA	CTCCAGTGA	TTGCCCAAA	CTGTCTCAG
sp-24513	GCTCGACTAAGCGAGGATAAACGTAATTAGGCTTAGAGCGGCAGGGTTCTTCCCTGCGTTTAG	ATGAA	CAGTT	73	GTGCACCAT	AACTGTGCG	TCCAGCAAA	CTTAAGACG
sp-24521	GCTCGACTAAGCGAGGATAAACGGCTTTAGGCTTAGAGCGTCCCGGCAGCTGCCGGGGGTAGTC	ATGAA	AAAAA	74	GCGTACAAG	GTTGTGTGT	CGTAAAGTC	CTGGTGATG
sp-24522	GCTCGACTAAGCGAGGATAAACGGCTTTAGGCTTAGAGCGTCTTGGTCGGTATTACCGGCTGGGGGTAGTC	ATGAA	AAAAA	81	GATACCGTG	TAATCCGGA	ATGTCCGTG	TGCTCAGTA
sp-24523	GCTCGACTAAGCGAGGATAAACGGCTTTAGGCTTAGAGCGGCAGGGTTCTTCCCTGCGTAGTC	ATGAA	AAAAA	73	GACCGCTAT	AGCTAGTGA	TAGACTGGA	GGTCTCAGA
sp-24531	GCTCGACTAAGCGAGGATAAACGACATTAGGCTTAGAGCGTCCCGGCAGCTGCCGGGGGTTGTA	ATGAA	TAACT	74	CCTGGGTTA	CCTAGAACT	CCAAGCAGA	TCTTTGCGT
sp-24532	GCTCGACTAAGCGAGGATAAACGACATTAGGCTTAGAGCGTCTTGGTCGGTATTACCGGCTGGGGGTTGTA	ATGAA	TAACT	81	TGTCTTGGG	GCTCTTTAC	GCCACAAAA	TCTGGGAAG
sp-24533	GCTCGACTAAGCGAGGATAAACGACATTAGGCTTAGAGCGGCAGGGTTCTTCCCTGCGTTGTA	ATGAA	TAACT	73	GTGTCCTCA	CGGAGTCTA	ACAGACCTA	CGAGTATTC
sp-24541	GCTCGACTAAGCGAGGATAAACGGTGTTAGGCTTAGAGCGTCCCGGCAGCTGCCGGGGGTCACA	ATGAA	TTAAT	74	GTCCAAACG	CGGATTTAG	TGGTCGTTT	TTGTCTGGC
sp-24542	GCTCGACTAAGCGAGGATAAACGGTGTTAGGCTTAGAGCGTCTTGGTCGGTATTACCGGCTGGGGGTCACA	ATGAA	TTAAT	81	GTGCTAACG	CTACACGAA	ATTCCCGGT	GTACTCTAG
sp-24543	GCTCGACTAAGCGAGGATAAACGGTGTTAGGCTTAGAGCGGCAGGGTTCTTCCCTGCGTCACA	ATGAA	TTAAT	73	CGATAAGCG	TTCTCCGGA	TCCGATCAA	GGGTTGCTT
sp-24551	GCTCGACTAAGCGAGGATAAACGTTATTAGGCTTAGAGCGTCCCGGCAGCTGCCGGGGGTTAAC	ATGAA	TAATA	74	TCGCCAATC	CGACTGTCT	AGATGACCG	CTAACCGAT
sp-24552	GCTCGACTAAGCGAGGATAAACGTTATTAGGCTTAGAGCGTCTTGGTCGGTATTACCGGCTGGGGGTTAAC	ATGAA	TAATA	81	TGTCACGCT	TTGCGCCAT	CTGGGACTA	TCGCGATAC
sp-24553	GCTCGACTAAGCGAGGATAAACGTTATTAGGCTTAGAGCGGCAGGGTTCTTCCCTGCGTTAAC	ATGAA	TAATA	73	AAGCGTTCG	GTTACCGAG	AGCGCTTAG	AGCTAGGGT
sp-25111	GCTCGACTATGCGAGGATAAATAGTAATTAGGCATAGTGCGTCCCGGCAGCTGCCGGGGGTTTAG	ATGAA	CAGTT	75	CATCTATCG	CAATTCGCT	CACCGCTTA	GAAACGTCA
sp-25112	GCTCGACTATGCGAGGATAAATAGTAATTAGGCATAGTGCGTCTTGGTCGGTATTACCGGCTGGGGGTTTAG	ATGAA	CAGTT	82	TGAAGAGCG	CCCGTAGAA	GACGAATTC	CATCAAGGA
sp-25113	GCTCGACTATGCGAGGATAAATAGTAATTAGGCATAGTGCGGCAGGGTTCTTCCCTGCGTTTAG	ATGAA	CAGTT	74	AGAGCAGTG	ATAAGACGC	ACGGTTGGA	CCACTCCAA
sp-25121	GCTCGACTATGCGAGGATAAATAGGCTTTAGGCATAGTGCGTCCCGGCAGCTGCCGGGGGTAGTC	ATGAA	AAAAA	75	GCTTAAGGT	ACTACTGAG	CACACGGTA	CATGATGCC
sp-25122	GCTCGACTATGCGAGGATAAATAGGCTTTAGGCATAGTGCGTCTTGGTCGGTATTACCGGCTGGGGGTAGTC	ATGAA	AAAAA	82	GGTAAGCAA	TGGAGCAAG	TAGGACAGC	AGCATGGTT
sp-25123	GCTCGACTATGCGAGGATAAATAGGCTTTAGGCATAGTGCGGCAGGGTTCTTCCCTGCGTAGTC	ATGAA	AAAAA	74	CAAGGCATC	TAGTACGTC	ACTTGGGAC	TTTTGCTGG
sp-25131	GCTCGACTATGCGAGGATAAATAGACATTAGGCATAGTGCGTCCCGGCAGCTGCCGGGGGTTGTA	ATGAA	TAACT	75	ATGGACAGG	ATATGTCGG	GCAAGTTCA	CTAGTGGTA
sp-25132	GCTCGACTATGCGAGGATAAATAGACATTAGGCATAGTGCGTCTTGGTCGGTATTACCGGCTGGGGGTTGTA	ATGAA	TAACT	82	TACCTGATG	GGTATGTCA	CTCTTTGGA	TGGGACAAC
sp-25133	GCTCGACTATGCGAGGATAAATAGACATTAGGCATAGTGCGGCAGGGTTCTTCCCTGCGTTGTA	ATGAA	TAACT	74	GCTGTTTGG	TGCTAACAC	ACAAGCCTT	CACATCGTC
sp-25141	GCTCGACTATGCGAGGATAAATAGGTGTTAGGCATAGTGCGTCCCGGCAGCTGCCGGGGGTCACA	ATGAA	TTAAT	75	GAAGTCATC	GCAGCCTTA	CTTGATCCC	AGATCCAGC
sp-25142	GCTCGACTATGCGAGGATAAATAGGTGTTAGGCATAGTGCGTCTTGGTCGGTATTACCGGCTGGGGGTCACA	ATGAA	TTAAT	82	CCAAAATGC	TATCGGACA	AACCCTAAC	ACTGCTGAA
sp-25143	GCTCGACTATGCGAGGATAAATAGGTGTTAGGCATAGTGCGGCAGGGTTCTTCCCTGCGTCACA	ATGAA	TTAAT	74	AACAGCTCC	TAGCTCTGA	ATACTGACC	CCGATACGT
sp-25151	GCTCGACTATGCGAGGATAAATAGTTATTAGGCATAGTGCGTCCCGGCAGCTGCCGGGGGTTAAC	ATGAA	TAATA	75	ATGGTCCGA	AGGCAACCT	GAAGAGAGC	CATGATGAG
sp-25152	GCTCGACTATGCGAGGATAAATAGTTATTAGGCATAGTGCGTCTTGGTCGGTATTACCGGCTGGGGGTTAAC	ATGAA	TAATA	82	AAGAGCGCA	ACCCGAGAT	TACATGGGT	AATGCAGGT
sp-25153	GCTCGACTATGCGAGGATAAATAGTTATTAGGCATAGTGCGGCAGGGTTCTTCCCTGCGTTAAC	ATGAA	TAATA	74	GAGAGTTGG	AGCGTTTTG	TGGACCTAA	CCGTCCTAT
sp-25211	GCTCGACTATGCGAGGATAAATAGGTAATTAGGCATAGTGCGTCCCGGCAGCTGCCGGGGGTTTAG	ATGAA	CAGTT	76	TCGAGTCAG	CTGAGTTGA	TTTCGTCGC	TTTCTACGC
sp-25212	GCTCGACTATGCGAGGATAAATAGGTAATTAGGCATAGTGCGTCTTGGTCGGTATTACCGGCTGGGGGTTTAG	ATGAA	CAGTT	83	ATGATAGGG	TGCCCCAAA	ACGTCAGAG	GGCAGTAGT
sp-25213	GCTCGACTATGCGAGGATAAATAGGTAATTAGGCATAGTGCGGCAGGGTTCTTCCCTGCGTTTAG	ATGAA	CAGTT	75	AAGTGTAGC	AAGCAGGGA	GTGCTCGTA	ACTCAACGT
sp-25221	GCTCGACTATGCGAGGATAAATAGGGCTTTAGGCATAGTGCGTCCCGGCAGCTGCCGGGGGTAGTC	ATGAA	AAAAA	76	CTTCCGTAT	GGTGATCTA	CTTGATGCA	GAAGACGAT
sp-25222	GCTCGACTATGCGAGGATAAATAGGGCTTTAGGCATAGTGCGTCTTGGTCGGTATTACCGGCTGGGGGTAGTC	ATGAA	AAAAA	83	TTGAAGCTG	GCATTATCG	TATAGCGGT	TCTGATGTC
sp-25223	GCTCGACTATGCGAGGATAAATAGGGCTTTAGGCATAGTGCGGCAGGGTTCTTCCCTGCGTAGTC	ATGAA	AAAAA	75	CCCTTATGT	ATAGATCGC	GAGCGTTTA	AGTTGTGCT
sp-25231	GCTCGACTATGCGAGGATAAATAGGACATTAGGCATAGTGCGTCCCGGCAGCTGCCGGGGGTTGTA	ATGAA	TAACT	76	AATGGGCTG	CCTCAGTAC	CTGAATCTG	AACCAGGTT
sp-25232	GCTCGACTATGCGAGGATAAATAGGACATTAGGCATAGTGCGTCTTGGTCGGTATTACCGGCTGGGGGTTGTA	ATGAA	TAACT	83	ACTTAAGGC	TATGGTTGG	ACGGGATCT	AATCAGCTC
sp-25233	GCTCGACTATGCGAGGATAAATAGGACATTAGGCATAGTGCGGCAGGGTTCTTCCCTGCGTTGTA	ATGAA	TAACT	75	GTGTTCATG	TGCGAGTAC	AATACACGG	GATCGAAAC
sp-25241	GCTCGACTATGCGAGGATAAATAGGGTGTTAGGCATAGTGCGTCCCGGCAGCTGCCGGGGGTCACA	ATGAA	TTAAT	76	AGCCATTAG	AGCCATCTG	CTCGTTCCA	GAGGTCTCT
sp-25242	GCTCGACTATGCGAGGATAAATAGGGTGTTAGGCATAGTGCGTCTTGGTCGGTATTACCGGCTGGGGGTCACA	ATGAA	TTAAT	83	TACCGGCTT	AGTCGAACC	TGGCTCAAC	TCGGTGAAT
sp-25243	GCTCGACTATGCGAGGATAAATAGGGTGTTAGGCATAGTGCGGCAGGGTTCTTCCCTGCGTCACA	ATGAA	TTAAT	75	CGAATCGCT	TTAGAACCC	GAAGATTCG	ATGGATCGG
sp-25251	GCTCGACTATGCGAGGATAAATAGGTTATTAGGCATAGTGCGTCCCGGCAGCTGCCGGGGGTTAAC	ATGAA	TAATA	76	GGGAATAAG	CTCTATGAG	AGCGTAAAG	AAGCAAGGG
sp-25252	GCTCGACTATGCGAGGATAAATAGGTTATTAGGCATAGTGCGTCTTGGTCGGTATTACCGGCTGGGGGTTAAC	ATGAA	TAATA	83	CGTGACATG	CAAAGCACA	TCAACACGC	CAGGCCTAT
sp-25253	GCTCGACTATGCGAGGATAAATAGGTTATTAGGCATAGTGCGGCAGGGTTCTTCCCTGCGTTAAC	ATGAA	TAATA	75	CTCCGCTAA	GTTGCTACT	GAGTTGGGA	CGGAAACAA
sp-25311	GCTCGACTATGCGAGGGTAAATAGTAATTAGGCATAGTGCGTCCCGGCAGCTGCCGGGGGTTTAG	ATGAA	CAGTT	75	GGATTGCTC	ACTGCATAG	TTACGAGTG	TTCCGCTGA
sp-25312	GCTCGACTATGCGAGGGTAAATAGTAATTAGGCATAGTGCGTCTTGGTCGGTATTACCGGCTGGGGGTTTAG	ATGAA	CAGTT	82	CATCTGCTC	TTCTAGACC	AGAAGGGCT	CGATTGCCA
sp-25313	GCTCGACTATGCGAGGGTAAATAGTAATTAGGCATAGTGCGGCAGGGTTCTTCCCTGCGTTTAG	ATGAA	CAGTT	74	TTAACCGCT	GATGAAGCG	GCAGTCGTT	ACACGAACA
sp-25321	GCTCGACTATGCGAGGGTAAATAGGCTTTAGGCATAGTGCGTCCCGGCAGCTGCCGGGGGTAGTC	ATGAA	AAAAA	75	GTTGTCGGT	GGAGGATTT	GTTCGACTA	TACTCAGTG
sp-25322	GCTCGACTATGCGAGGGTAAATAGGCTTTAGGCATAGTGCGTCTTGGTCGGTATTACCGGCTGGGGGTAGTC	ATGAA	AAAAA	82	GTGGTACTC	CAGAGTAGG	TAGGCTGTA	CTGCTTCTC
sp-25323	GCTCGACTATGCGAGGGTAAATAGGCTTTAGGCATAGTGCGGCAGGGTTCTTCCCTGCGTAGTC	ATGAA	AAAAA	74	CAGCACAAG	TACAACCCG	CTGCTGTCA	GTGTATGGC
sp-25331	GCTCGACTATGCGAGGGTAAATAGACATTAGGCATAGTGCGTCCCGGCAGCTGCCGGGGGTTGTA	ATGAA	TAACT	75	TCATTGTGC	ATCTACTCG	GCTAAAGTG	CGAATCTAC
sp-25332	GCTCGACTATGCGAGGGTAAATAGACATTAGGCATAGTGCGTCTTGGTCGGTATTACCGGCTGGGGGTTGTA	ATGAA	TAACT	82	AGTAGCGAG	TGGCATTTC	AACCTGAAG	CCATAAAGC
sp-25333	GCTCGACTATGCGAGGGTAAATAGACATTAGGCATAGTGCGGCAGGGTTCTTCCCTGCGTTGTA	ATGAA	TAACT	74	TGTAGGCGT	TCCTTCGAA	GGTAGTTCG	TCAGTGTTG
sp-25341	GCTCGACTATGCGAGGGTAAATAGGTGTTAGGCATAGTGCGTCCCGGCAGCTGCCGGGGGTCACA	ATGAA	TTAAT	75	GTTAAGGCC	GGGCATTCA	TGCTAGACA	CAGGTGTTC
sp-25342	GCTCGACTATGCGAGGGTAAATAGGTGTTAGGCATAGTGCGTCTTGGTCGGTATTACCGGCTGGGGGTCACA	ATGAA	TTAAT	82	GTCTGGAGA	CAAGTGAGC	AGCGAATTG	AGTCGGTAT
sp-25343	GCTCGACTATGCGAGGGTAAATAGGTGTTAGGCATAGTGCGGCAGGGTTCTTCCCTGCGTCACA	ATGAA	TTAAT	74	GCGACAGTT	GGTGAATCA	GGTGATACT	TCAGCCAAC
sp-25351	GCTCGACTATGCGAGGGTAAATAGTTATTAGGCATAGTGCGTCCCGGCAGCTGCCGGGGGTTAAC	ATGAA	TAATA	75	CAGCTAGGT	CTTACCTTG	GAAAGCCTG	CGATCGTAA
sp-25352	GCTCGACTATGCGAGGGTAAATAGTTATTAGGCATAGTGCGTCTTGGTCGGTATTACCGGCTGGGGGTTAAC	ATGAA	TAATA	82	CGTAGCATA	AAGGCAGTT	CTTTTCTCC	AACCACAGC
sp-25353	GCTCGACTATGCGAGGGTAAATAGTTATTAGGCATAGTGCGGCAGGGTTCTTCCCTGCGTTAAC	ATGAA	TAATA	74	GAGGATGCA	CGATGGGAA	TTTGCCGTG	CATGACGAT
sp-25411	GCTCGACTATGCGAGGTTAAATAGTAATTAGGCATAGTGCGTCCCGGCAGCTGCCGGGGGTTTAG	ATGAA	CAGTT	75	TACGCTTCT	CGATAGAGT	CTTAGCGAA	TACACATGC
sp-25412	GCTCGACTATGCGAGGTTAAATAGTAATTAGGCATAGTGCGTCTTGGTCGGTATTACCGGCTGGGGGTTTAG	ATGAA	CAGTT	82	AATAAGGGG	ATGGCTGAC	TCATTCTCC	GCTCGTAAC
sp-25413	GCTCGACTATGCGAGGTTAAATAGTAATTAGGCATAGTGCGGCAGGGTTCTTCCCTGCGTTTAG	ATGAA	CAGTT	74	CGATATGAC	GCGGCATAT	TTTCGTCCT	CCTTGCAAT
sp-25421	GCTCGACTATGCGAGGTTAAATAGGCTTTAGGCATAGTGCGTCCCGGCAGCTGCCGGGGGTAGTC	ATGAA	AAAAA	75	AAGGGGTGA	GAAGCACCA	CTCTCGATC	GAGTGTACC
sp-25422	GCTCGACTATGCGAGGTTAAATAGGCTTTAGGCATAGTGCGTCTTGGTCGGTATTACCGGCTGGGGGTAGTC	ATGAA	AAAAA	82	CCTGATTTG	CCACAGTCA	TATCCAGCA	TGCGCATTA
sp-25423	GCTCGACTATGCGAGGTTAAATAGGCTTTAGGCATAGTGCGGCAGGGTTCTTCCCTGCGTAGTC	ATGAA	AAAAA	74	GCTGGAATG	CTACCTACT	GACAACTTG	TACGAAAGG
sp-25431	GCTCGACTATGCGAGGTTAAATAGACATTAGGCATAGTGCGTCCCGGCAGCTGCCGGGGGTTGTA	ATGAA	TAACT	75	TAAGGACCG	TCCAGACGT	TGCACTGGT	ATCGTTACC
sp-25432	GCTCGACTATGCGAGGTTAAATAGACATTAGGCATAGTGCGTCTTGGTCGGTATTACCGGCTGGGGGTTGTA	ATGAA	TAACT	82	ACAAGTGTC	TAGTGCGAG	GCTGAGTCA	AGGAGTGAG
sp-25433	GCTCGACTATGCGAGGTTAAATAGACATTAGGCATAGTGCGGCAGGGTTCTTCCCTGCGTTGTA	ATGAA	TAACT	74	GATAGTCGT	ATCGCATGA	GTAGACTCT	CTAACACGT
sp-25441	GCTCGACTATGCGAGGTTAAATAGGTGTTAGGCATAGTGCGTCCCGGCAGCTGCCGGGGGTCACA	ATGAA	TTAAT	75	TCATGGTCC	CCCTAATCT	AATTCGCCG	GCGATAAGT
sp-25442	GCTCGACTATGCGAGGTTAAATAGGTGTTAGGCATAGTGCGTCTTGGTCGGTATTACCGGCTGGGGGTCACA	ATGAA	TTAAT	82	AACCAGTGT	AGGTATCTG	TGTGTGATC	GCGGTTTGT
sp-25443	GCTCGACTATGCGAGGTTAAATAGGTGTTAGGCATAGTGCGGCAGGGTTCTTCCCTGCGTCACA	ATGAA	TTAAT	74	GCGGTTTTC	ACATGGACA	CTGATCGAA	TATCGCACG
sp-25451	GCTCGACTATGCGAGGTTAAATAGTTATTAGGCATAGTGCGTCCCGGCAGCTGCCGGGGGTTAAC	ATGAA	TAATA	75	GGTATCTGA	ACTCACAGT	TGATGGCGA	AGGGTCAAA
sp-25452	GCTCGACTATGCGAGGTTAAATAGTTATTAGGCATAGTGCGTCTTGGTCGGTATTACCGGCTGGGGGTTAAC	ATGAA	TAATA	82	CGGCTACTT	ACTATGCGA	ATCCTGGAG	CTTTGGATG
sp-25453	GCTCGACTATGCGAGGTTAAATAGTTATTAGGCATAGTGCGGCAGGGTTCTTCCCTGCGTTAAC	ATGAA	TAATA	74	CCACAATGG	TTATCGGGA	GCTACCAAG	TGTACCTCC
sp-25511	GCTCGACTATGCGAGGATAAACGTAATTAGGCATAGTGCGTCCCGGCAGCTGCCGGGGGTTTAG	ATGAA	CAGTT	74	ACCGGTTTC	TCGTGGACA	CTGCCTAGA	AGTGGTATC
sp-25512	GCTCGACTATGCGAGGATAAACGTAATTAGGCATAGTGCGTCTTGGTCGGTATTACCGGCTGGGGGTTTAG	ATGAA	CAGTT	81	AGTGTCGTT	ACGCAGGAT	GTCATCTAC	ATGTCTGCG
sp-25513	GCTCGACTATGCGAGGATAAACGTAATTAGGCATAGTGCGGCAGGGTTCTTCCCTGCGTTTAG	ATGAA	CAGTT	73	AACCGTTGA	ACACGACTT	TTGGTACAG	AAGTGTCCT
sp-25521	GCTCGACTATGCGAGGATAAACGGCTTTAGGCATAGTGCGTCCCGGCAGCTGCCGGGGGTAGTC	ATGAA	AAAAA	74	CCGTTCATC	TGTCCTGAA	TGGCTCCTT	ATGCAAAGG
sp-25522	GCTCGACTATGCGAGGATAAACGGCTTTAGGCATAGTGCGTCTTGGTCGGTATTACCGGCTGGGGGTAGTC	ATGAA	AAAAA	81	GCTTTGCTT	CTCGTTTTC	GTGCGAAGA	CTTTACCTC
sp-25523	GCTCGACTATGCGAGGATAAACGGCTTTAGGCATAGTGCGGCAGGGTTCTTCCCTGCGTAGTC	ATGAA	AAAAA	73	AGTTCATGC	GAGACCAAC	GAACGTAGA	GATGTGTCG
sp-25531	GCTCGACTATGCGAGGATAAACGACATTAGGCATAGTGCGTCCCGGCAGCTGCCGGGGGTTGTA	ATGAA	TAACT	74	GACGCTTTG	GCGTTTTGA	TAGGCTCTG	TCGTCGAAC
sp-25532	GCTCGACTATGCGAGGATAAACGACATTAGGCATAGTGCGTCTTGGTCGGTATTACCGGCTGGGGGTTGTA	ATGAA	TAACT	81	CATTTCCTG	AGACAATGC	TCCCTCATG	AACCGCGAA
sp-25533	GCTCGACTATGCGAGGATAAACGACATTAGGCATAGTGCGGCAGGGTTCTTCCCTGCGTTGTA	ATGAA	TAACT	73	TCCACAATC	TGATCGCTG	TTGGCGACT	GTCCAGGAA
sp-25541	GCTCGACTATGCGAGGATAAACGGTGTTAGGCATAGTGCGTCCCGGCAGCTGCCGGGGGTCACA	ATGAA	TTAAT	74	GAGCTGGAA	CTGTTATCG	CATCTGAGG	TAACAGTCC
sp-25542	GCTCGACTATGCGAGGATAAACGGTGTTAGGCATAGTGCGTCTTGGTCGGTATTACCGGCTGGGGGTCACA	ATGAA	TTAAT	81	CCATAAGGT	AACAGGCGA	CTATACAGC	CACAAGTCA
sp-25543	GCTCGACTATGCGAGGATAAACGGTGTTAGGCATAGTGCGGCAGGGTTCTTCCCTGCGTCACA	ATGAA	TTAAT	73	TCCGCCTTT	GTGTCCCTT	CGTAAAGCG	AATCGCGTA
sp-25551	GCTCGACTATGCGAGGATAAACGTTATTAGGCATAGTGCGTCCCGGCAGCTGCCGGGGGTTAAC	ATGAA	TAATA	74	GATCGACTT	GAGACTCGA	GACCAAAAC	GGCGAACAA
sp-25552	GCTCGACTATGCGAGGATAAACGTTATTAGGCATAGTGCGTCTTGGTCGGTATTACCGGCTGGGGGTTAAC	ATGAA	TAATA	81	ATCACGGAA	TGATGTGGA	GCGACTAGT	AGTGAGGGT
sp-25553	GCTCGACTATGCGAGGATAAACGTTATTAGGCATAGTGCGGCAGGGTTCTTCCCTGCGTTAAC	ATGAA	TAATA	73	GTAAAGTCG	CTGCACATT	ATCAATGCC	AGACCCCTA
sp-26111	GCTCGTTAGGGCGAGGATAAATAGTAATTAAGCCCTAAGCGTCCCGGCAGCTGCCGGGGGTTTAG	ATGAA	CAGTT	75	AAGAGGCAT	GCATCGAGT	AACCGTCCA	AGGCATTTG
sp-26112	GCTCGTTAGGGCGAGGATAAATAGTAATTAAGCCCTAAGCGTCTTGGTCGGTATTACCGGCTGGGGGTTTAG	ATGAA	CAGTT	82	ACTGTCGTG	TCTAGCACT	GGAATGAGT	AAGCTTGCT
sp-26113	GCTCGTTAGGGCGAGGATAAATAGTAATTAAGCCCTAAGCGGCAGGGTTCTTCCCTGCGTTTAG	ATGAA	CAGTT	74	CTCATGGTT	GTTTGTAGC	ACTGTACGC	ACATTACGC
sp-26121	GCTCGTTAGGGCGAGGATAAATAGGCTTTAAGCCCTAAGCGTCCCGGCAGCTGCCGGGGGTAGTC	ATGAA	AAAAA	75	CTCTTGACT	TATCGATCG	GAACAACCA	TGGAAACGT
sp-26122	GCTCGTTAGGGCGAGGATAAATAGGCTTTAAGCCCTAAGCGTCTTGGTCGGTATTACCGGCTGGGGGTAGTC	ATGAA	AAAAA	82	GCTAGTGAG	AGCAAGTCT	GGTGGATAC	GACAAAGCT
sp-26123	GCTCGTTAGGGCGAGGATAAATAGGCTTTAAGCCCTAAGCGGCAGGGTTCTTCCCTGCGTAGTC	ATGAA	AAAAA	74	TTTGCAACG	TGGTGGCAT	AACATCTCG	TCCACGAGT
sp-26131	GCTCGTTAGGGCGAGGATAAATAGACATTAAGCCCTAAGCGTCCCGGCAGCTGCCGGGGGTTGTA	ATGAA	TAACT	75	TCCTACCTC	TCCGAATGG	CTCGAGTTT	GTCTACAAG
sp-26132	GCTCGTTAGGGCGAGGATAAATAGACATTAAGCCCTAAGCGTCTTGGTCGGTATTACCGGCTGGGGGTTGTA	ATGAA	TAACT	82	ATCGAAAGG	AAACACGGT	GAACGGGAT	CCACTGAGT
sp-26133	GCTCGTTAGGGCGAGGATAAATAGACATTAAGCCCTAAGCGGCAGGGTTCTTCCCTGCGTTGTA	ATGAA	TAACT	74	TGGAGCTAC	AGTCGTGAC	ACTACTCCG	GGCTATAGA
sp-26141	GCTCGTTAGGGCGAGGATAAATAGGTGTTAAGCCCTAAGCGTCCCGGCAGCTGCCGGGGGTCACA	ATGAA	TTAAT	75	CCTAAGCGA	GGCGTAGTA	TACAGAACC	CATGGGCTT
sp-26142	GCTCGTTAGGGCGAGGATAAATAGGTGTTAAGCCCTAAGCGTCTTGGTCGGTATTACCGGCTGGGGGTCACA	ATGAA	TTAAT	82	TTCCGCGAA	GTGCAATTG	ACAGGAGAG	AACCCACGT
sp-26143	GCTCGTTAGGGCGAGGATAAATAGGTGTTAAGCCCTAAGCGGCAGGGTTCTTCCCTGCGTCACA	ATGAA	TTAAT	74	TTGTCCGAC	ACAGGGTTT	AGGCCTCTA	AAAGCCACC
sp-26151	GCTCGTTAGGGCGAGGATAAATAGTTATTAAGCCCTAAGCGTCCCGGCAGCTGCCGGGGGTTAAC	ATGAA	TAATA	75	CCCTCTGTT	ACACAGCAT	CGATGAATG	TAGGCCAAG
sp-26152	GCTCGTTAGGGCGAGGATAAATAGTTATTAAGCCCTAAGCGTCTTGGTCGGTATTACCGGCTGGGGGTTAAC	ATGAA	TAATA	82	GTCACAGAC	CCCTTCTTG	TGCGAAATG	CTCGATCTT
sp-26153	GCTCGTTAGGGCGAGGATAAATAGTTATTAAGCCCTAAGCGGCAGGGTTCTTCCCTGCGTTAAC	ATGAA	TAATA	74	CCTTCTGGT	GCTGACATA	ATTCGCAGG	GTATGTGCT
sp-26211	GCTCGTTAGGGCGAGGATAAATAGGTAATTAAGCCCTAAGCGTCCCGGCAGCTGCCGGGGGTTTAG	ATGAA	CAGTT	76	GTGCGGATA	TGCAATCCT	AGTGTACAC	GCATGCGAT
sp-26212	GCTCGTTAGGGCGAGGATAAATAGGTAATTAAGCCCTAAGCGTCTTGGTCGGTATTACCGGCTGGGGGTTTAG	ATGAA	CAGTT	83	AGCAGGTAC	TCAAGGCTA	ACCCAACCT	CACGTCTAC
sp-26213	GCTCGTTAGGGCGAGGATAAATAGGTAATTAAGCCCTAAGCGGCAGGGTTCTTCCCTGCGTTTAG	ATGAA	CAGTT	75	ATGGTCTAC	AGCTAAGCC	TCCCGATAT	CCACTTATG
sp-26221	GCTCGTTAGGGCGAGGATAAATAGGGCTTTAAGCCCTAAGCGTCCCGGCAGCTGCCGGGGGTAGTC	ATGAA	AAAAA	76	TGGGACTAT	AAGACAGAG	CACAATCGT	TCTGACGTA
sp-26222	GCTCGTTAGGGCGAGGATAAATAGGGCTTTAAGCCCTAAGCGTCTTGGTCGGTATTACCGGCTGGGGGTAGTC	ATGAA	AAAAA	83	GGATAGTGC	CTGTTTCCA	TGATGTGTC	CTGTCGACT
sp-26223	GCTCGTTAGGGCGAGGATAAATAGGGCTTTAAGCCCTAAGCGGCAGGGTTCTTCCCTGCGTAGTC	ATGAA	AAAAA	75	GCTAGCAGT	ACTGGTTGC	TCGTAACAC	GAGGTATGT
sp-26231	GCTCGTTAGGGCGAGGATAAATAGGACATTAAGCCCTAAGCGTCCCGGCAGCTGCCGGGGGTTGTA	ATGAA	TAACT	76	CTCAAACCA	CTAACTCCC	TTCAGCTAC	CAGTTGACG
sp-26232	GCTCGTTAGGGCGAGGATAAATAGGACATTAAGCCCTAAGCGTCTTGGTCGGTATTACCGGCTGGGGGTTGTA	ATGAA	TAACT	83	ACCGAGTGA	AAAATCCGG	ATGGCTAGT	TCTCAACGA
sp-26233	GCTCGTTAGGGCGAGGATAAATAGGACATTAAGCCCTAAGCGGCAGGGTTCTTCCCTGCGTTGTA	ATGAA	TAACT	75	GTAGACAAC	TTGTTCAGG	CACTGTGAA	ACATTCCCC
sp-26241	GCTCGTTAGGGCGAGGATAAATAGGGTGTTAAGCCCTAAGCGTCCCGGCAGCTGCCGGGGGTCACA	ATGAA	TTAAT	76	GCCTTACTC	GTGTTCCTC	GAGGGTTCT	TACGCGTAT
sp-26242	GCTCGTTAGGGCGAGGATAAATAGGGTGTTAAGCCCTAAGCGTCTTGGTCGGTATTACCGGCTGGGGGTCACA	ATGAA	TTAAT	83	ATTATGCCC	TGTGAGACA	TAACGCTAG	CTCACTGCA
sp-26243	GCTCGTTAGGGCGAGGATAAATAGGGTGTTAAGCCCTAAGCGGCAGGGTTCTTCCCTGCGTCACA	ATGAA	TTAAT	75	CCTTTCAGA	ACTTGAGCT	GCGAAACAG	ACCTACGAG
sp-26251	GCTCGTTAGGGCGAGGATAAATAGGTTATTAAGCCCTAAGCGTCCCGGCAGCTGCCGGGGGTTAAC	ATGAA	TAATA	76	TGACGGCTT	AAACAGTGG	AACGCCTTC	ACGAGCTAG
sp-26252	GCTCGTTAGGGCGAGGATAAATAGGTTATTAAGCCCTAAGCGTCTTGGTCGGTATTACCGGCTGGGGGTTAAC	ATGAA	TAATA	83	AAAGACGGG	TAGGAAGGA	CCCCTTTCA	GCATTTTGC
sp-26253	GCTCGTTAGGGCGAGGATAAATAGGTTATTAAGCCCTAAGCGGCAGGGTTCTTCCCTGCGTTAAC	ATGAA	TAATA	75	GTCACTAAC	TGCATCTTC	ATCTAGCGC	ATTACTGCG
sp-26311	GCTCGTTAGGGCGAGGGTAAATAGTAATTAAGCCCTAAGCGTCCCGGCAGCTGCCGGGGGTTTAG	ATGAA	CAGTT	75	TGGGTAACC	TGCCAAGTA	GGCGTCAAA	ACGACCAAT
sp-26312	GCTCGTTAGGGCGAGGGTAAATAGTAATTAAGCCCTAAGCGTCTTGGTCGGTATTACCGGCTGGGGGTTTAG	ATGAA	CAGTT	82	TAGGTAGGC	TGGGAATGG	GCAAAGCTA	CAACTCTGC
sp-26313	GCTCGTTAGGGCGAGGGTAAATAGTAATTAAGCCCTAAGCGGCAGGGTTCTTCCCTGCGTTTAG	ATGAA	CAGTT	74	CTGGGTCTT	GGGGAAAAG	CTGTATCGG	CATGGATAG
sp-26321	GCTCGTTAGGGCGAGGGTAAATAGGCTTTAAGCCCTAAGCGTCCCGGCAGCTGCCGGGGGTAGTC	ATGAA	AAAAA	75	ACTCTTGCT	CATGGTACA	ACTCTCTAG	TAACTCTCG
sp-26322	GCTCGTTAGGGCGAGGGTAAATAGGCTTTAAGCCCTAAGCGTCTTGGTCGGTATTACCGGCTGGGGGTAGTC	ATGAA	AAAAA	82	TTTCGTGGT	GTGCTTACA	CTGGAGTCA	ATGGCCAGA
sp-26323	GCTCGTTAGGGCGAGGGTAAATAGGCTTTAAGCCCTAAGCGGCAGGGTTCTTCCCTGCGTAGTC	ATGAA	AAAAA	74	CTAAGTCCT	GACCATTCT	CTGCGAACT	CAAGATACG
sp-26331	GCTCGTTAGGGCGAGGGTAAATAGACATTAAGCCCTAAGCGTCCCGGCAGCTGCCGGGGGTTGTA	ATGAA	TAACT	75	GGGTGTAAT	CAGTAGCTA	ATATTGCCC	AGAGAACAG
sp-26332	GCTCGTTAGGGCGAGGGTAAATAGACATTAAGCCCTAAGCGTCTTGGTCGGTATTACCGGCTGGGGGTTGTA	ATGAA	TAACT	82	CAGAATGAG	GACCCTACT	CTGTTGGTA	GAGAACCTG
sp-26333	GCTCGTTAGGGCGAGGGTAAATAGACATTAAGCCCTAAGCGGCAGGGTTCTTCCCTGCGTTGTA	ATGAA	TAACT	74	GGAAACATC	CATTATCGC	CGAAAACGA	GTAGATCCG
sp-26341	GCTCGTTAGGGCGAGGGTAAATAGGTGTTAAGCCCTAAGCGTCCCGGCAGCTGCCGGGGGTCACA	ATGAA	TTAAT	75	AGCAGGCTA	ACGTCATAC	TTACCCGTG	CCTTGAGAT
sp-26342	GCTCGTTAGGGCGAGGGTAAATAGGTGTTAAGCCCTAAGCGTCTTGGTCGGTATTACCGGCTGGGGGTCACA	ATGAA	TTAAT	82	TACCTGGAA	CCAGATTAG	CACAACCAA	CAACGGATC
sp-26343	GCTCGTTAGGGCGAGGGTAAATAGGTGTTAAGCCCTAAGCGGCAGGGTTCTTCCCTGCGTCACA	ATGAA	TTAAT	74	CGGAGCTTA	CGACTGCAA	CGTTCCTTC	AGTGGCAAA
sp-26351	GCTCGTTAGGGCGAGGGTAAATAGTTATTAAGCCCTAAGCGTCCCGGCAGCTGCCGGGGGTTAAC	ATGAA	TAATA	75	CAGGCTTGA	TTGGGTACA	CCTGTACAC	CTCGTGATA
sp-26352	GCTCGTTAGGGCGAGGGTAAATAGTTATTAAGCCCTAAGCGTCTTGGTCGGTATTACCGGCTGGGGGTTAAC	ATGAA	TAATA	82	CCAACGATA	TCGTCTCAC	TCTTATGCG	CGTCTTAAG
sp-26353	GCTCGTTAGGGCGAGGGTAAATAGTTATTAAGCCCTAAGCGGCAGGGTTCTTCCCTGCGTTAAC	ATGAA	TAATA	74	TGCTTTGCA	ACGTGTTGG	ATCCTTCAG	GCCTCTAAG
sp-26411	GCTCGTTAGGGCGAGGTTAAATAGTAATTAAGCCCTAAGCGTCCCGGCAGCTGCCGGGGGTTTAG	ATGAA	CAGTT	75	GCATTCCGT	GAAACAGCA	CCTTCGTAT	ATACGGTAC
sp-26412	GCTCGTTAGGGCGAGGTTAAATAGTAATTAAGCCCTAAGCGTCTTGGTCGGTATTACCGGCTGGGGGTTTAG	ATGAA	CAGTT	82	GAGGCTTAA	ACCGAATAG	ATGATGGGC	CATCTGCAG
sp-26413	GCTCGTTAGGGCGAGGTTAAATAGTAATTAAGCCCTAAGCGGCAGGGTTCTTCCCTGCGTTTAG	ATGAA	CAGTT	74	ACAGAACTG	ATTAGGTCG	AAAAGGGCC	ACACATGGA
sp-26421	GCTCGTTAGGGCGAGGTTAAATAGGCTTTAAGCCCTAAGCGTCCCGGCAGCTGCCGGGGGTAGTC	ATGAA	AAAAA	75	GCATGTCAA	CTACTAGAC	GATGTGTGC	GCATCGAAC
sp-26422	GCTCGTTAGGGCGAGGTTAAATAGGCTTTAAGCCCTAAGCGTCTTGGTCGGTATTACCGGCTGGGGGTAGTC	ATGAA	AAAAA	82	ACCGTTACT	AGACACCTC	CAAGGTTCG	AGCATTGCC
sp-26423	GCTCGTTAGGGCGAGGTTAAATAGGCTTTAAGCCCTAAGCGGCAGGGTTCTTCCCTGCGTAGTC	ATGAA	AAAAA	74	GTTTCCGGA	GTAGGACGA	AGGCACTTA	GCATGATCC
sp-26431	GCTCGTTAGGGCGAGGTTAAATAGACATTAAGCCCTAAGCGTCCCGGCAGCTGCCGGGGGTTGTA	ATGAA	TAACT	75	ACCGCAAAG	ACCAATGAC	AATACGGAC	GGAGTTACT
sp-26432	GCTCGTTAGGGCGAGGTTAAATAGACATTAAGCCCTAAGCGTCTTGGTCGGTATTACCGGCTGGGGGTTGTA	ATGAA	TAACT	82	AGTGAGAGA	CAAAGACGC	TACACAGGT	TTAATGGCG
sp-26433	GCTCGTTAGGGCGAGGTTAAATAGACATTAAGCCCTAAGCGGCAGGGTTCTTCCCTGCGTTGTA	ATGAA	TAACT	74	CAACTCTAG	ACGGAAAGT	GGGCATACT	GATGTTGCG
sp-26441	GCTCGTTAGGGCGAGGTTAAATAGGTGTTAAGCCCTAAGCGTCCCGGCAGCTGCCGGGGGTCACA	ATGAA	TTAAT	75	GTAGCATGC	AATGCGGTC	CCAGTCAGA	AGTAAACGC
sp-26442	GCTCGTTAGGGCGAGGTTAAATAGGTGTTAAGCCCTAAGCGTCTTGGTCGGTATTACCGGCTGGGGGTCACA	ATGAA	TTAAT	82	CAAACGACC	TCCGTACCT	TCTGCGATC	GAAGCTCGA
sp-26443	GCTCGTTAGGGCGAGGTTAAATAGGTGTTAAGCCCTAAGCGGCAGGGTTCTTCCCTGCGTCACA	ATGAA	TTAAT	74	CTAACCCAC	CATTAGGGC	TGGATGTCA	CCAGACATA
sp-26451	GCTCGTTAGGGCGAGGTTAAATAGTTATTAAGCCCTAAGCGTCCCGGCAGCTGCCGGGGGTTAAC	ATGAA	TAATA	75	CTATCGTGA	TTGGCGATA	TACCCAACG	ACCATGTTG
sp-26452	GCTCGTTAGGGCGAGGTTAAATAGTTATTAAGCCCTAAGCGTCTTGGTCGGTATTACCGGCTGGGGGTTAAC	ATGAA	TAATA	82	TCACACGCT	GTAAGCGAC	CTTGTGGAC	CAGGATTTC
sp-26453	GCTCGTTAGGGCGAGGTTAAATAGTTATTAAGCCCTAAGCGGCAGGGTTCTTCCCTGCGTTAAC	ATGAA	TAATA	74	TCAGCGCAT	CAGGATCAG	CGCGATATG	ATACCCACC
sp-26511	GCTCGTTAGGGCGAGGATAAACGTAATTAAGCCCTAAGCGTCCCGGCAGCTGCCGGGGGTTTAG	ATGAA	CAGTT	74	CCGAGGATT	GGTAAACTG	CTAGTGAGA	AAGGTTCTG
sp-26512	GCTCGTTAGGGCGAGGATAAACGTAATTAAGCCCTAAGCGTCTTGGTCGGTATTACCGGCTGGGGGTTTAG	ATGAA	CAGTT	81	CTTCTCGCA	AACTCGCAA	AGCAGTTGG	TTCCAGGAT
sp-26513	GCTCGTTAGGGCGAGGATAAACGTAATTAAGCCCTAAGCGGCAGGGTTCTTCCCTGCGTTTAG	ATGAA	CAGTT	73	AACCAGACG	TGGGTTTCT	TTCATTCGG	TCGAGTTTC
sp-26521	GCTCGTTAGGGCGAGGATAAACGGCTTTAAGCCCTAAGCGTCCCGGCAGCTGCCGGGGGTAGTC	ATGAA	AAAAA	74	ACCCTTGAG	CAGTCGATC	TTAGTGGAC	AGTCAGACT
sp-26522	GCTCGTTAGGGCGAGGATAAACGGCTTTAAGCCCTAAGCGTCTTGGTCGGTATTACCGGCTGGGGGTAGTC	ATGAA	AAAAA	81	GCACATACG	GCTTGATCG	TCCAAGCAA	ATCCCTTGT
sp-26523	GCTCGTTAGGGCGAGGATAAACGGCTTTAAGCCCTAAGCGGCAGGGTTCTTCCCTGCGTAGTC	ATGAA	AAAAA	73	CTAACACTC	CGAGAGTGT	AGAGGAATG	GTACCAACC
sp-26531	GCTCGTTAGGGCGAGGATAAACGACATTAAGCCCTAAGCGTCCCGGCAGCTGCCGGGGGTTGTA	ATGAA	TAACT	74	GCAATCGTG	GCCTCCAAA	GCATCGTGA	CGTTCTGGA
sp-26532	GCTCGTTAGGGCGAGGATAAACGACATTAAGCCCTAAGCGTCTTGGTCGGTATTACCGGCTGGGGGTTGTA	ATGAA	TAACT	81	TTGCACTGA	CCGCTATTT	TGACTCTCC	CCAACCTGT
sp-26533	GCTCGTTAGGGCGAGGATAAACGACATTAAGCCCTAAGCGGCAGGGTTCTTCCCTGCGTTGTA	ATGAA	TAACT	73	TTGAGAACG	ACACTGATC	GCACAGCAA	ATAACAGCG
sp-26541	GCTCGTTAGGGCGAGGATAAACGGTGTTAAGCCCTAAGCGTCCCGGCAGCTGCCGGGGGTCACA	ATGAA	TTAAT	74	TTGGAAAGC	GTGGAATAC	GATTCCCAA	GACTAAGAC
sp-26542	GCTCGTTAGGGCGAGGATAAACGGTGTTAAGCCCTAAGCGTCTTGGTCGGTATTACCGGCTGGGGGTCACA	ATGAA	TTAAT	81	AGACGAGAT	CACGATTAC	AGTGGTCGA	ACCCCCAAA
sp-26543	GCTCGTTAGGGCGAGGATAAACGGTGTTAAGCCCTAAGCGGCAGGGTTCTTCCCTGCGTCACA	ATGAA	TTAAT	73	ATTGCGGTA	GGCTAGAAC	TGAGTCTCG	TATTCGGCT
sp-26551	GCTCGTTAGGGCGAGGATAAACGTTATTAAGCCCTAAGCGTCCCGGCAGCTGCCGGGGGTTAAC	ATGAA	TAATA	74	TTGTTGGGC	ACTGTCTTC	GCGAATTTG	CCAGAGCTT
sp-26552	GCTCGTTAGGGCGAGGATAAACGTTATTAAGCCCTAAGCGTCTTGGTCGGTATTACCGGCTGGGGGTTAAC	ATGAA	TAATA	81	ACATCGCTA	AGAAAGCAG	CGTCATTGT	TTCCCTGGA
sp-26553	GCTCGTTAGGGCGAGGATAAACGTTATTAAGCCCTAAGCGGCAGGGTTCTTCCCTGCGTTAAC	ATGAA	TAATA	73	CCTGGCAAA	ATGGTAGCA	GCAGAGTCT	CTGCGAGTA
sp-27111	GCTCGTGGCGGCGAGGATAAATAGTAATTAAGCCGCCAGCGTCCCGGCAGCTGCCGGGGGTTTAG	ATGAA	CAGTT	75	AAACGCGTC	CAATGCTCC	GGACCTGTT	TATGGCGCA
sp-27112	GCTCGTGGCGGCGAGGATAAATAGTAATTAAGCCGCCAGCGTCTTGGTCGGTATTACCGGCTGGGGGTTTAG	ATGAA	CAGTT	82	TTCCCGGTA	CATCTCCAA	AACCCAGAC	GCTACTCTA
sp-27113	GCTCGTGGCGGCGAGGATAAATAGTAATTAAGCCGCCAGCGGCAGGGTTCTTCCCTGCGTTTAG	ATGAA	CAGTT	74	GTGGCTTCT	ATCGTACCG	TTATCGTGC	ATCGTCGAC
sp-27121	GCTCGTGGCGGCGAGGATAAATAGGCTTTAAGCCGCCAGCGTCCCGGCAGCTGCCGGGGGTAGTC	ATGAA	AAAAA	75	GAAAGACCT	TACTCTGCT	TCGCATAGG	GTAGTCACT
sp-27122	GCTCGTGGCGGCGAGGATAAATAGGCTTTAAGCCGCCAGCGTCTTGGTCGGTATTACCGGCTGGGGGTAGTC	ATGAA	AAAAA	82	AAGGGAGTA	GAGGTGATC	ATAGCGCAA	CCCTGATGA
sp-27123	GCTCGTGGCGGCGAGGATAAATAGGCTTTAAGCCGCCAGCGGCAGGGTTCTTCCCTGCGTAGTC	ATGAA	AAAAA	74	GAAATACCC	ATCTCGGAT	AGGGTAGGT	GATTCGAGT
sp-27131	GCTCGTGGCGGCGAGGATAAATAGACATTAAGCCGCCAGCGTCCCGGCAGCTGCCGGGGGTTGTA	ATGAA	TAACT	75	CGAGACGAT	CCAAGAGCA	TGTACGGAG	CCTCAGAGA
sp-27132	GCTCGTGGCGGCGAGGATAAATAGACATTAAGCCGCCAGCGTCTTGGTCGGTATTACCGGCTGGGGGTTGTA	ATGAA	TAACT	82	AAAGGAGGT	CTAGATCGT	CCCATTCTT	TAGAACGAG
sp-27133	GCTCGTGGCGGCGAGGATAAATAGACATTAAGCCGCCAGCGGCAGGGTTCTTCCCTGCGTTGTA	ATGAA	TAACT	74	TCACCTGTT	TGTGTGTTG	AAAGGGTTG	CCTAGGGTT
sp-27141	GCTCGTGGCGGCGAGGATAAATAGGTGTTAAGCCGCCAGCGTCCCGGCAGCTGCCGGGGGTCACA	ATGAA	TTAAT	75	GCGTAAAGA	ACACAACCC	CAATGCCAT	TGACTTCTG
sp-27142	GCTCGTGGCGGCGAGGATAAATAGGTGTTAAGCCGCCAGCGTCTTGGTCGGTATTACCGGCTGGGGGTCACA	ATGAA	TTAAT	82	CGTGATACC	TTTGGAGAC	GTGGCCTTT	CAGTTCGTT
sp-27143	GCTCGTGGCGGCGAGGATAAATAGGTGTTAAGCCGCCAGCGGCAGGGTTCTTCCCTGCGTCACA	ATGAA	TTAAT	74	TCCAACAGA	GCTTGGGAA	GGTGCAGTT	GCTAGCTCA
sp-27151	GCTCGTGGCGGCGAGGATAAATAGTTATTAAGCCGCCAGCGTCCCGGCAGCTGCCGGGGGTTAAC	ATGAA	TAATA	75	CTAGAGAGT	GGCATCAAC	GGCCAAGAA	CTGTTAACC
sp-27152	GCTCGTGGCGGCGAGGATAAATAGTTATTAAGCCGCCAGCGTCTTGGTCGGTATTACCGGCTGGGGGTTAAC	ATGAA	TAATA	82	TCTTGGACG	AGTTTCCGC	TGGGATTGA	GTTATTCCC
sp-27153	GCTCGTGGCGGCGAGGATAAATAGTTATTAAGCCGCCAGCGGCAGGGTTCTTCCCTGCGTTAAC	ATGAA	TAATA	74	TTCTCTCCT	CCATTGGAA	TAAGTGCAG	ACACTCCTC
sp-27211	GCTCGTGGCGGCGAGGATAAATAGGTAATTAAGCCGCCAGCGTCCCGGCAGCTGCCGGGGGTTTAG	ATGAA	CAGTT	76	ACTCTCGTA	CGCCTTTTT	TCAGTCGCT	CGTTTCTTG
sp-27212	GCTCGTGGCGGCGAGGATAAATAGGTAATTAAGCCGCCAGCGTCTTGGTCGGTATTACCGGCTGGGGGTTTAG	ATGAA	CAGTT	83	GTATCGACA	TCAGGCTTA	TAGCACGGT	CTTCGCGAT
sp-27213	GCTCGTGGCGGCGAGGATAAATAGGTAATTAAGCCGCCAGCGGCAGGGTTCTTCCCTGCGTTTAG	ATGAA	CAGTT	75	GAGTTACAG	CATAACTCG	TTTAGCAGG	GATAAGCGG
sp-27221	GCTCGTGGCGGCGAGGATAAATAGGGCTTTAAGCCGCCAGCGTCCCGGCAGCTGCCGGGGGTAGTC	ATGAA	AAAAA	76	AGGCCTACT	CAGAGGTCA	ATGGCACTG	CGGTATTTC
sp-27222	GCTCGTGGCGGCGAGGATAAATAGGGCTTTAAGCCGCCAGCGTCTTGGTCGGTATTACCGGCTGGGGGTAGTC	ATGAA	AAAAA	83	TAGACTACG	ACCGAGGTT	CCATGTACA	TAACGGACT
sp-27223	GCTCGTGGCGGCGAGGATAAATAGGGCTTTAAGCCGCCAGCGGCAGGGTTCTTCCCTGCGTAGTC	ATGAA	AAAAA	75	GTCTCCAAT	CGAACAGAT	ACTGGGCAT	AACGATCGC
sp-27231	GCTCGTGGCGGCGAGGATAAATAGGACATTAAGCCGCCAGCGTCCCGGCAGCTGCCGGGGGTTGTA	ATGAA	TAACT	76	CCTGACTAC	AGGCTGATT	CGTTAGTCG	CCGTATACA
sp-27232	GCTCGTGGCGGCGAGGATAAATAGGACATTAAGCCGCCAGCGTCTTGGTCGGTATTACCGGCTGGGGGTTGTA	ATGAA	TAACT	83	TGGGGGATT	AGAGAACCA	TTCGATCTC	CAAGAGGAC
sp-27233	GCTCGTGGCGGCGAGGATAAATAGGACATTAAGCCGCCAGCGGCAGGGTTCTTCCCTGCGTTGTA	ATGAA	TAACT	75	AAGACCAGG	CCATTCTCG	CACACGATC	CGTGATGTC
sp-27241	GCTCGTGGCGGCGAGGATAAATAGGGTGTTAAGCCGCCAGCGTCCCGGCAGCTGCCGGGGGTCACA	ATGAA	TTAAT	76	GAGTACGCA	ACCGAAGAC	CGTTTGGTT	TTCGGGCTA
sp-27242	GCTCGTGGCGGCGAGGATAAATAGGGTGTTAAGCCGCCAGCGTCTTGGTCGGTATTACCGGCTGGGGGTCACA	ATGAA	TTAAT	83	TCCCAGATG	ATTTAGCGG	AAGGCCAAA	TATGCTGGG
sp-27243	GCTCGTGGCGGCGAGGATAAATAGGGTGTTAAGCCGCCAGCGGCAGGGTTCTTCCCTGCGTCACA	ATGAA	TTAAT	75	GGATTAGCT	TGAACGTAC	GCATATAGG	CTGATAGTC
sp-27251	GCTCGTGGCGGCGAGGATAAATAGGTTATTAAGCCGCCAGCGTCCCGGCAGCTGCCGGGGGTTAAC	ATGAA	TAATA	76	CCTTAGCAA	ACCGGCTTA	AGGTTCACT	GTACTTTGG
sp-27252	GCTCGTGGCGGCGAGGATAAATAGGTTATTAAGCCGCCAGCGTCTTGGTCGGTATTACCGGCTGGGGGTTAAC	ATGAA	TAATA	83	TGCATCAGC	CACGCTTAT	TCGGTATCG	GATCAGGAT
sp-27253	GCTCGTGGCGGCGAGGATAAATAGGTTATTAAGCCGCCAGCGGCAGGGTTCTTCCCTGCGTTAAC	ATGAA	TAATA	75	AGTCGCTGT	CCGCGTAAA	AAACCCATC	CGTCGGTAA
sp-27311	GCTCGTGGCGGCGAGGGTAAATAGTAATTAAGCCGCCAGCGTCCCGGCAGCTGCCGGGGGTTTAG	ATGAA	CAGTT	75	GATGCTGTC	TCGTGCCTA	TACGACGAG	CTCTCATGG
sp-27312	GCTCGTGGCGGCGAGGGTAAATAGTAATTAAGCCGCCAGCGTCTTGGTCGGTATTACCGGCTGGGGGTTTAG	ATGAA	CAGTT	82	ATTTCCGAC	AAGGTCGGA	CCACGATAG	GTCTAGCGA
sp-27313	GCTCGTGGCGGCGAGGGTAAATAGTAATTAAGCCGCCAGCGGCAGGGTTCTTCCCTGCGTTTAG	ATGAA	CAGTT	74	CAGCGTTGT	ATGGTCAAG	AACGAGTGG	TCATAGAGG
sp-27321	GCTCGTGGCGGCGAGGGTAAATAGGCTTTAAGCCGCCAGCGTCCCGGCAGCTGCCGGGGGTAGTC	ATGAA	AAAAA	75	CCGAATGAA	ACACTGACG	GTGTTATGG	TTCTCAACC
sp-27322	GCTCGTGGCGGCGAGGGTAAATAGGCTTTAAGCCGCCAGCGTCTTGGTCGGTATTACCGGCTGGGGGTAGTC	ATGAA	AAAAA	82	CAGAGATTC	ACCTCCTAT	CCAATCGAC	TCACTTGGT
sp-27323	GCTCGTGGCGGCGAGGGTAAATAGGCTTTAAGCCGCCAGCGGCAGGGTTCTTCCCTGCGTAGTC	ATGAA	AAAAA	74	CTTTCCTCA	CCTCAAGGT	TGTTAGGCT	CTCACTGGT
sp-27331	GCTCGTGGCGGCGAGGGTAAATAGACATTAAGCCGCCAGCGTCCCGGCAGCTGCCGGGGGTTGTA	ATGAA	TAACT	75	GCGCTTTAG	GAACAACAG	GACAGGAGA	CAAATCCCC
sp-27332	GCTCGTGGCGGCGAGGGTAAATAGACATTAAGCCGCCAGCGTCTTGGTCGGTATTACCGGCTGGGGGTTGTA	ATGAA	TAACT	82	GACCGAAAA	ATAGGCAAC	AGCCCTTTA	GCCCATAAC
sp-27333	GCTCGTGGCGGCGAGGGTAAATAGACATTAAGCCGCCAGCGGCAGGGTTCTTCCCTGCGTTGTA	ATGAA	TAACT	74	ATAGCGTGC	TATCCGTCG	CCCGTTAAT	ACTATCGCA
sp-27341	GCTCGTGGCGGCGAGGGTAAATAGGTGTTAAGCCGCCAGCGTCCCGGCAGCTGCCGGGGGTCACA	ATGAA	TTAAT	75	ACAACCCGT	ATGACACAC	CCATGAAGT	TGGGTATGC
sp-27342	GCTCGTGGCGGCGAGGGTAAATAGGTGTTAAGCCGCCAGCGTCTTGGTCGGTATTACCGGCTGGGGGTCACA	ATGAA	TTAAT	82	ACATGGCGT	TCCTTTACC	AGTGTAGGG	AAGAGAGCT
sp-27343	GCTCGTGGCGGCGAGGGTAAATAGGTGTTAAGCCGCCAGCGGCAGGGTTCTTCCCTGCGTCACA	ATGAA	TTAAT	74	GACTTTGCC	TAGCTGTGC	CCCGTGATT	CAGGTTTGT
sp-27351	GCTCGTGGCGGCGAGGGTAAATAGTTATTAAGCCGCCAGCGTCCCGGCAGCTGCCGGGGGTTAAC	ATGAA	TAATA	75	ACACGGTTC	GCGTTACAT	ACATGCACG	TGATAGTGG
sp-27352	GCTCGTGGCGGCGAGGGTAAATAGTTATTAAGCCGCCAGCGTCTTGGTCGGTATTACCGGCTGGGGGTTAAC	ATGAA	TAATA	82	CCTGAATAG	AGGGGATAA	GCGTTGGAT	ACTTGAGTC
sp-27353	GCTCGTGGCGGCGAGGGTAAATAGTTATTAAGCCGCCAGCGGCAGGGTTCTTCCCTGCGTTAAC	ATGAA	TAATA	74	TTCCAACCC	GATAAGCCC	AAAGAGACG	TTGCCAACC
sp-27411	GCTCGTGGCGGCGAGGTTAAATAGTAATTAAGCCGCCAGCGTCCCGGCAGCTGCCGGGGGTTTAG	ATGAA	CAGTT	75	CGTCTCTAG	TTGCGGTTG	ATGCTGCAG	TCGAACCGA
sp-27412	GCTCGTGGCGGCGAGGTTAAATAGTAATTAAGCCGCCAGCGTCTTGGTCGGTATTACCGGCTGGGGGTTTAG	ATGAA	CAGTT	82	TGACTAACG	TAGCTCGTT	TAATCGTCC	AACGGTCTA
sp-27413	GCTCGTGGCGGCGAGGTTAAATAGTAATTAAGCCGCCAGCGGCAGGGTTCTTCCCTGCGTTTAG	ATGAA	CAGTT	74	AACGACAGA	CTGCTCAAA	TATGCTACC	TTGAGCATG
sp-27421	GCTCGTGGCGGCGAGGTTAAATAGGCTTTAAGCCGCCAGCGTCCCGGCAGCTGCCGGGGGTAGTC	ATGAA	AAAAA	75	TCTGGGTTT	GACGAAGAT	GGGATCTTG	AAGGGTGAT
sp-27422	GCTCGTGGCGGCGAGGTTAAATAGGCTTTAAGCCGCCAGCGTCTTGGTCGGTATTACCGGCTGGGGGTAGTC	ATGAA	AAAAA	82	CAGATGTGA	CTGCTGACT	TCCATTTCC	CTAGGTGAG
sp-27423	GCTCGTGGCGGCGAGGTTAAATAGGCTTTAAGCCGCCAGCGGCAGGGTTCTTCCCTGCGTAGTC	ATGAA	AAAAA	74	TATTCCTCC	ACTGATCTG	AAGGTCCTT	CAGGATGTA
sp-27431	GCTCGTGGCGGCGAGGTTAAATAGACATTAAGCCGCCAGCGTCCCGGCAGCTGCCGGGGGTTGTA	ATGAA	TAACT	75	ATTGCGATG	ATGGACCGT	GACTATTCG	GTGCTTGAC
sp-27432	GCTCGTGGCGGCGAGGTTAAATAGACATTAAGCCGCCAGCGTCTTGGTCGGTATTACCGGCTGGGGGTTGTA	ATGAA	TAACT	82	CTCGAAGAC	AGGAGGTTT	AACATGAGC	ATGTCCAGC
sp-27433	GCTCGTGGCGGCGAGGTTAAATAGACATTAAGCCGCCAGCGGCAGGGTTCTTCCCTGCGTTGTA	ATGAA	TAACT	74	CGTTCAGAA	TGCCGTGTA	CTTCTACCT	ATGTGGTCG
sp-27441	GCTCGTGGCGGCGAGGTTAAATAGGTGTTAAGCCGCCAGCGTCCCGGCAGCTGCCGGGGGTCACA	ATGAA	TTAAT	75	TAGGCATCA	TAAGGTTGC	TGCGAACGT	AAGACACTC
sp-27442	GCTCGTGGCGGCGAGGTTAAATAGGTGTTAAGCCGCCAGCGTCTTGGTCGGTATTACCGGCTGGGGGTCACA	ATGAA	TTAAT	82	TTATCCCCG	TGCAAACCC	ACCATCCGT	AAGTTCGAC
sp-27443	GCTCGTGGCGGCGAGGTTAAATAGGTGTTAAGCCGCCAGCGGCAGGGTTCTTCCCTGCGTCACA	ATGAA	TTAAT	74	GAAGAGCGT	ATGGACCTC	ATCACACGG	GCTCCATAA
sp-27451	GCTCGTGGCGGCGAGGTTAAATAGTTATTAAGCCGCCAGCGTCCCGGCAGCTGCCGGGGGTTAAC	ATGAA	TAATA	75	TCGAACCAC	AAGGTGACT	CGACTGAAT	GGTCAATGG
sp-27452	GCTCGTGGCGGCGAGGTTAAATAGTTATTAAGCCGCCAGCGTCTTGGTCGGTATTACCGGCTGGGGGTTAAC	ATGAA	TAATA	82	TTCCTGTTC	AGATCACTG	GCATACAAC	AAGGAGGTC
sp-27453	GCTCGTGGCGGCGAGGTTAAATAGTTATTAAGCCGCCAGCGGCAGGGTTCTTCCCTGCGTTAAC	ATGAA	TAATA	74	TCAGCTAGC	GTTGTCTGA	GTAGTGCTA	CTTGTCTAC
sp-27511	GCTCGTGGCGGCGAGGATAAACGTAATTAAGCCGCCAGCGTCCCGGCAGCTGCCGGGGGTTTAG	ATGAA	CAGTT	74	TATTGGGTC	CAACAGAGA	GCAAAGGAT	TGCTTCCGT
sp-27512	GCTCGTGGCGGCGAGGATAAACGTAATTAAGCCGCCAGCGTCTTGGTCGGTATTACCGGCTGGGGGTTTAG	ATGAA	CAGTT	81	TGCGTGATG	GGACAGTCA	GTCCGACTT	CACCTTAGG
sp-27513	GCTCGTGGCGGCGAGGATAAACGTAATTAAGCCGCCAGCGGCAGGGTTCTTCCCTGCGTTTAG	ATGAA	CAGTT	73	GCCTGTTGA	CTGCTCTTC	CTTTGACGC	ATGGGTGTT
sp-27521	GCTCGTGGCGGCGAGGATAAACGGCTTTAAGCCGCCAGCGTCCCGGCAGCTGCCGGGGGTAGTC	ATGAA	AAAAA	74	GCACTTAGC	AGTACATGG	GACGTGATA	GTGTGCAGA
sp-27522	GCTCGTGGCGGCGAGGATAAACGGCTTTAAGCCGCCAGCGTCTTGGTCGGTATTACCGGCTGGGGGTAGTC	ATGAA	AAAAA	81	CGACAAACT	TCACCCTAT	AAGCCAAGG	TAAGCTCGT
sp-27523	GCTCGTGGCGGCGAGGATAAACGGCTTTAAGCCGCCAGCGGCAGGGTTCTTCCCTGCGTAGTC	ATGAA	AAAAA	73	GCATTGACC	CGAGATGCT	GGGTTTGTA	AGGAAGCAT
sp-27531	GCTCGTGGCGGCGAGGATAAACGACATTAAGCCGCCAGCGTCCCGGCAGCTGCCGGGGGTTGTA	ATGAA	TAACT	74	CATGCCAAA	GAGTGATCT	GGAGCAAGA	TGACAAGCG
sp-27532	GCTCGTGGCGGCGAGGATAAACGACATTAAGCCGCCAGCGTCTTGGTCGGTATTACCGGCTGGGGGTTGTA	ATGAA	TAACT	81	GTGTTCCAT	CAGCATCTG	GGGAGTATG	GAGAAGACT
sp-27533	GCTCGTGGCGGCGAGGATAAACGACATTAAGCCGCCAGCGGCAGGGTTCTTCCCTGCGTTGTA	ATGAA	TAACT	73	CCCTAGTAT	ACTGGCAAC	TTATCGCAG	AAGCTTGGG
sp-27541	GCTCGTGGCGGCGAGGATAAACGGTGTTAAGCCGCCAGCGTCCCGGCAGCTGCCGGGGGTCACA	ATGAA	TTAAT	74	CGATGAACC	GTGGGATAA	AGCGGACTA	GAACAGGTA
sp-27542	GCTCGTGGCGGCGAGGATAAACGGTGTTAAGCCGCCAGCGTCTTGGTCGGTATTACCGGCTGGGGGTCACA	ATGAA	TTAAT	81	GCTAGTCAC	GCATTTACG	CCTGGTGAA	CCAATGTGG
sp-27543	GCTCGTGGCGGCGAGGATAAACGGTGTTAAGCCGCCAGCGGCAGGGTTCTTCCCTGCGTCACA	ATGAA	TTAAT	73	TACACCCCA	AGCGGTCTT	CATTTTGCG	GAGAACAAG
sp-27551	GCTCGTGGCGGCGAGGATAAACGTTATTAAGCCGCCAGCGTCCCGGCAGCTGCCGGGGGTTAAC	ATGAA	TAATA	74	CTACTCTCG	TGTTCTGGC	CTCTCACCT	ACTGCTCTC
sp-27552	GCTCGTGGCGGCGAGGATAAACGTTATTAAGCCGCCAGCGTCTTGGTCGGTATTACCGGCTGGGGGTTAAC	ATGAA	TAATA	81	TTACCGAGA	GTGGAATGG	AGAAAGGGG	ATCGCAGTT
sp-27553	GCTCGTGGCGGCGAGGATAAACGTTATTAAGCCGCCAGCGGCAGGGTTCTTCCCTGCGTTAAC	ATGAA	TAATA	73	TAGACCTGC	GGGAGAAGT	ACAGTGTGA	CTAGCTCAG
sp-31111	AGTGGTCTGGGCCACTATAAATAGTAATTAGGCCCAGAGCGTCCCGGCAGCTGCCGGGGGTTTAG	AATAA	CAGTT	75	ATACCGCTA	TGAACGACC	CTTGTACCC	GCTTCATTG
sp-31112	AGTGGTCTGGGCCACTATAAATAGTAATTAGGCCCAGAGCGTCTTGGTCGGTATTACCGGCTGGGGGTTTAG	AATAA	CAGTT	82	TACACACTC	CCGTTTCGA	CCTATCAAC	CCCATCCAT
sp-31113	AGTGGTCTGGGCCACTATAAATAGTAATTAGGCCCAGAGCGGCAGGGTTCTTCCCTGCGTTTAG	AATAA	CAGTT	74	TGTTCCGTC	TGGGTCACT	TCTATTGGG	TAACACTGG
sp-31121	AGTGGTCTGGGCCACTATAAATAGGCTTTAGGCCCAGAGCGTCCCGGCAGCTGCCGGGGGTAGTC	AATAA	AAAAA	75	GGCTTTCTA	AGAATGGTG	AGACGGAAT	AGGAACCTG
sp-31122	AGTGGTCTGGGCCACTATAAATAGGCTTTAGGCCCAGAGCGTCTTGGTCGGTATTACCGGCTGGGGGTAGTC	AATAA	AAAAA	82	GCCATGTGT	CATGACCTC	GGCCACTAT	GTACGGAGT
sp-31123	AGTGGTCTGGGCCACTATAAATAGGCTTTAGGCCCAGAGCGGCAGGGTTCTTCCCTGCGTAGTC	AATAA	AAAAA	74	TTCAGTCAG	AAGGCGCAT	CGAGTCAAC	TCGACGAAG
sp-31131	AGTGGTCTGGGCCACTATAAATAGACATTAGGCCCAGAGCGTCCCGGCAGCTGCCGGGGGTTGTA	AATAA	TAACT	75	CAATCTCGA	GACTACATC	AACGCTTAC	GGAGGAAAC
sp-31132	AGTGGTCTGGGCCACTATAAATAGACATTAGGCCCAGAGCGTCTTGGTCGGTATTACCGGCTGGGGGTTGTA	AATAA	TAACT	82	AGCATGGAG	ACTTGGGTT	TCAGAGCTC	CATGGCACT
sp-31133	AGTGGTCTGGGCCACTATAAATAGACATTAGGCCCAGAGCGGCAGGGTTCTTCCCTGCGTTGTA	AATAA	TAACT	74	CACTATGGC	CTCATGAGA	GGCAACACA	GGTTATGCC
sp-31141	AGTGGTCTGGGCCACTATAAATAGGTGTTAGGCCCAGAGCGTCCCGGCAGCTGCCGGGGGTCACA	AATAA	TTAAT	75	AACGGTACG	ATCCCGAAC	TTGGATGCT	CCCAAACAT
sp-31142	AGTGGTCTGGGCCACTATAAATAGGTGTTAGGCCCAGAGCGTCTTGGTCGGTATTACCGGCTGGGGGTCACA	AATAA	TTAAT	82	GGACTTATC	TGGTAGGAA	CAGACGATT	AACGTTGAG
sp-31143	AGTGGTCTGGGCCACTATAAATAGGTGTTAGGCCCAGAGCGGCAGGGTTCTTCCCTGCGTCACA	AATAA	TTAAT	74	GGGTTGATG	CTGACACAG	TAGCGTGCT	TGGAAGAAC
sp-31151	AGTGGTCTGGGCCACTATAAATAGTTATTAGGCCCAGAGCGTCCCGGCAGCTGCCGGGGGTTAAC	AATAA	TAATA	75	AGAGAACTC	GGATATCTG	GAACCTTGA	TCTCGATAG
sp-31152	AGTGGTCTGGGCCACTATAAATAGTTATTAGGCCCAGAGCGTCTTGGTCGGTATTACCGGCTGGGGGTTAAC	AATAA	TAATA	82	TGCCACTAG	GCCTGAATT	GAGGAGATA	TGAGTGAGA
sp-31153	AGTGGTCTGGGCCACTATAAATAGTTATTAGGCCCAGAGCGGCAGGGTTCTTCCCTGCGTTAAC	AATAA	TAATA	74	TTGAAGCCA	GCACACTCT	TCAAGGAGC	CATCCGAGT
sp-31211	AGTGGTCTGGGCCACTATAAATAGGTAATTAGGCCCAGAGCGTCCCGGCAGCTGCCGGGGGTTTAG	AATAA	CAGTT	76	TGTCGTGTC	CTGCTTTGC	CCCATGACA	ACTTTCCAC
sp-31212	AGTGGTCTGGGCCACTATAAATAGGTAATTAGGCCCAGAGCGTCTTGGTCGGTATTACCGGCTGGGGGTTTAG	AATAA	CAGTT	83	AGAGAGAGG	GTTGCCATA	CGATCAGAG	CTTCCTAGG
sp-31213	AGTGGTCTGGGCCACTATAAATAGGTAATTAGGCCCAGAGCGGCAGGGTTCTTCCCTGCGTTTAG	AATAA	CAGTT	75	GACCCACTA	GCAGTCAAA	GTAGGGCAT	ACACCTTGC
sp-31221	AGTGGTCTGGGCCACTATAAATAGGGCTTTAGGCCCAGAGCGTCCCGGCAGCTGCCGGGGGTAGTC	AATAA	AAAAA	76	TACGCGATT	TGCGAATTC	GGCAGTTTA	GATGCTGCA
sp-31222	AGTGGTCTGGGCCACTATAAATAGGGCTTTAGGCCCAGAGCGTCTTGGTCGGTATTACCGGCTGGGGGTAGTC	AATAA	AAAAA	83	GCCCAAAGT	TTGTTGCAG	AACAAAGCC	AGATTCGGA
sp-31223	AGTGGTCTGGGCCACTATAAATAGGGCTTTAGGCCCAGAGCGGCAGGGTTCTTCCCTGCGTAGTC	AATAA	AAAAA	75	ATGCCTAGC	TGAGTGCAT	GTGTGGGAT	CTCTTCTGC
sp-31231	AGTGGTCTGGGCCACTATAAATAGGACATTAGGCCCAGAGCGTCCCGGCAGCTGCCGGGGGTTGTA	AATAA	TAACT	76	ATTCGGATC	GTCTGATCC	TCTAGCAGC	CTACGCAAT
sp-31232	AGTGGTCTGGGCCACTATAAATAGGACATTAGGCCCAGAGCGTCTTGGTCGGTATTACCGGCTGGGGGTTGTA	AATAA	TAACT	83	TCTACCTCG	CATATGACG	CGCTTGCTT	CAAGGAGTC
sp-31233	AGTGGTCTGGGCCACTATAAATAGGACATTAGGCCCAGAGCGGCAGGGTTCTTCCCTGCGTTGTA	AATAA	TAACT	75	ACTAGAGAG	TAGCACATG	GTCATGCTA	TGTGCGCAT
sp-31241	AGTGGTCTGGGCCACTATAAATAGGGTGTTAGGCCCAGAGCGTCCCGGCAGCTGCCGGGGGTCACA	AATAA	TTAAT	76	GACCCATGT	ATGTGCGCT	AAGACGGAT	CCCCTAACT
sp-31242	AGTGGTCTGGGCCACTATAAATAGGGTGTTAGGCCCAGAGCGTCTTGGTCGGTATTACCGGCTGGGGGTCACA	AATAA	TTAAT	83	AGGCGTAAG	GTGTTAAGC	CTTCATGGC	CATAACGCT
sp-31243	AGTGGTCTGGGCCACTATAAATAGGGTGTTAGGCCCAGAGCGGCAGGGTTCTTCCCTGCGTCACA	AATAA	TTAAT	75	GACTATGTC	ATCACCCTG	AGATGCGAC	CAACACGCT
sp-31251	AGTGGTCTGGGCCACTATAAATAGGTTATTAGGCCCAGAGCGTCCCGGCAGCTGCCGGGGGTTAAC	AATAA	TAATA	76	GATACGTAC	TAGCGATCT	CCAGCTAGA	AAAAGTCCG
sp-31252	AGTGGTCTGGGCCACTATAAATAGGTTATTAGGCCCAGAGCGTCTTGGTCGGTATTACCGGCTGGGGGTTAAC	AATAA	TAATA	83	ATAGTCCTC	GTTCCTAGT	AGATCTCCG	GATGACGAA
sp-31253	AGTGGTCTGGGCCACTATAAATAGGTTATTAGGCCCAGAGCGGCAGGGTTCTTCCCTGCGTTAAC	AATAA	TAATA	75	CCCATTGAG	CAAGTTCAG	AGAGTTTCG	AAGCGCACA
sp-31311	AGTGGTCTGGGCCACTGTAAATAGTAATTAGGCCCAGAGCGTCCCGGCAGCTGCCGGGGGTTTAG	AATAA	CAGTT	75	ACATAGGAC	GGGAAAGGT	TGTTCTGCT	CGACAAGCA
sp-31312	AGTGGTCTGGGCCACTGTAAATAGTAATTAGGCCCAGAGCGTCTTGGTCGGTATTACCGGCTGGGGGTTTAG	AATAA	CAGTT	82	GCAAGACGT	GCCTAAACT	TGGGAAAGT	ATTGGGGGA
sp-31313	AGTGGTCTGGGCCACTGTAAATAGTAATTAGGCCCAGAGCGGCAGGGTTCTTCCCTGCGTTTAG	AATAA	CAGTT	74	TAACGAGTC	ATCATTGCG	CCAGAGATC	CCTCTAGTA
sp-31321	AGTGGTCTGGGCCACTGTAAATAGGCTTTAGGCCCAGAGCGTCCCGGCAGCTGCCGGGGGTAGTC	AATAA	AAAAA	75	GTGACTCTT	TACAGAGTC	GCCGACTAT	CCGAGCATA
sp-31322	AGTGGTCTGGGCCACTGTAAATAGGCTTTAGGCCCAGAGCGTCTTGGTCGGTATTACCGGCTGGGGGTAGTC	AATAA	AAAAA	82	CCCAGTCTA	GACGACTAG	TGTAGGTGC	CCTGCTAAC
sp-31323	AGTGGTCTGGGCCACTGTAAATAGGCTTTAGGCCCAGAGCGGCAGGGTTCTTCCCTGCGTAGTC	AATAA	AAAAA	74	CCAATTCGT	TGGTACGAC	GCACACATC	TACTGGTTG
sp-31331	AGTGGTCTGGGCCACTGTAAATAGACATTAGGCCCAGAGCGTCCCGGCAGCTGCCGGGGGTTGTA	AATAA	TAACT	75	TTTCTAGCG	ACGTTGTGC	TAGTTCGCC	CGAATAGGA
sp-31332	AGTGGTCTGGGCCACTGTAAATAGACATTAGGCCCAGAGCGTCTTGGTCGGTATTACCGGCTGGGGGTTGTA	AATAA	TAACT	82	GCAGACATT	TGGTAAACC	AAACGTGGC	TGAGATCCA
sp-31333	AGTGGTCTGGGCCACTGTAAATAGACATTAGGCCCAGAGCGGCAGGGTTCTTCCCTGCGTTGTA	AATAA	TAACT	74	GTATAGCAC	GAAACCTGT	ATGGTGCAA	CTAAGGTCA
sp-31341	AGTGGTCTGGGCCACTGTAAATAGGTGTTAGGCCCAGAGCGTCCCGGCAGCTGCCGGGGGTCACA	AATAA	TTAAT	75	GTTCACACA	AGCACGACA	ATTCTCCGA	CTGACGTAC
sp-31342	AGTGGTCTGGGCCACTGTAAATAGGTGTTAGGCCCAGAGCGTCTTGGTCGGTATTACCGGCTGGGGGTCACA	AATAA	TTAAT	82	GAATCATCC	ACCGATGAA	TATTGGTGC	TCACCGCAA
sp-31343	AGTGGTCTGGGCCACTGTAAATAGGTGTTAGGCCCAGAGCGGCAGGGTTCTTCCCTGCGTCACA	AATAA	TTAAT	74	GAAGCTGTA	TGAAACCCT	CCTGGATGT	TTATCCGGT
sp-31351	AGTGGTCTGGGCCACTGTAAATAGTTATTAGGCCCAGAGCGTCCCGGCAGCTGCCGGGGGTTAAC	AATAA	TAATA	75	AATAGGAGC	CGATACGCA	CTCTTCGTC	GCGAAAAGG
sp-31352	AGTGGTCTGGGCCACTGTAAATAGTTATTAGGCCCAGAGCGTCTTGGTCGGTATTACCGGCTGGGGGTTAAC	AATAA	TAATA	82	GAAGGTGAT	CTTCCAGGA	AGCTATGGC	CGGATATCA
sp-31353	AGTGGTCTGGGCCACTGTAAATAGTTATTAGGCCCAGAGCGGCAGGGTTCTTCCCTGCGTTAAC	AATAA	TAATA	74	CCGCATTTC	TATGCCGCT	GGTAACTGC	TAAGCAGCG
sp-31411	AGTGGTCTGGGCCACTTTAAATAGTAATTAGGCCCAGAGCGTCCCGGCAGCTGCCGGGGGTTTAG	AATAA	CAGTT	75	CAAGGGGAT	ACATCGGCT	TACACCAAC	CCTTTAAGG
sp-31412	AGTGGTCTGGGCCACTTTAAATAGTAATTAGGCCCAGAGCGTCTTGGTCGGTATTACCGGCTGGGGGTTTAG	AATAA	CAGTT	82	CGTCAACTT	TAAGATGGC	GAATCAAGG	TGGTACTTC
sp-31413	AGTGGTCTGGGCCACTTTAAATAGTAATTAGGCCCAGAGCGGCAGGGTTCTTCCCTGCGTTTAG	AATAA	CAGTT	74	GCACTACAG	TACGAGGGT	GTACATCGT	GAAGTTGTG
sp-31421	AGTGGTCTGGGCCACTTTAAATAGGCTTTAGGCCCAGAGCGTCCCGGCAGCTGCCGGGGGTAGTC	AATAA	AAAAA	75	TCACTCAGC	AGCATCTTG	AGTCCCACT	ATTCCACGT
sp-31422	AGTGGTCTGGGCCACTTTAAATAGGCTTTAGGCCCAGAGCGTCTTGGTCGGTATTACCGGCTGGGGGTAGTC	AATAA	AAAAA	82	CTGATACCC	GTCTTCCAA	CCTCTAGCT	GGCATAGCA
sp-31423	AGTGGTCTGGGCCACTTTAAATAGGCTTTAGGCCCAGAGCGGCAGGGTTCTTCCCTGCGTAGTC	AATAA	AAAAA	74	TACCGTTCA	CCAGACAAT	TCAGGTATC	TCCATATGC
sp-31431	AGTGGTCTGGGCCACTTTAAATAGACATTAGGCCCAGAGCGTCCCGGCAGCTGCCGGGGGTTGTA	AATAA	TAACT	75	ATAGGGTCG	CTCGAACAA	TGCTGGAAG	CCACTTCAT
sp-31432	AGTGGTCTGGGCCACTTTAAATAGACATTAGGCCCAGAGCGTCTTGGTCGGTATTACCGGCTGGGGGTTGTA	AATAA	TAACT	82	CTTGCCTAA	TAACGTCTG	GCTCCCATA	CCATAAGAG
sp-31433	AGTGGTCTGGGCCACTTTAAATAGACATTAGGCCCAGAGCGGCAGGGTTCTTCCCTGCGTTGTA	AATAA	TAACT	74	CACTCTGAC	TGGTGGATC	GCATATTCC	ATCTCACCG
sp-31441	AGTGGTCTGGGCCACTTTAAATAGGTGTTAGGCCCAGAGCGTCCCGGCAGCTGCCGGGGGTCACA	AATAA	TTAAT	75	GTCGACACA	CCCAGAATT	AAACAAGCG	GTGAGTGAG
sp-31442	AGTGGTCTGGGCCACTTTAAATAGGTGTTAGGCCCAGAGCGTCTTGGTCGGTATTACCGGCTGGGGGTCACA	AATAA	TTAAT	82	TGATGGGGT	TGTCATTCC	CGAAAGATC	TAACGCGTT
sp-31443	AGTGGTCTGGGCCACTTTAAATAGGTGTTAGGCCCAGAGCGGCAGGGTTCTTCCCTGCGTCACA	AATAA	TTAAT	74	GATCTTCCT	TTGTCCTAG	AGACGACAG	AGCCACGTA
sp-31451	AGTGGTCTGGGCCACTTTAAATAGTTATTAGGCCCAGAGCGTCCCGGCAGCTGCCGGGGGTTAAC	AATAA	TAATA	75	TGCCTAGTG	CCGTTAAGT	GCACGATTC	GTGCAGTCA
sp-31452	AGTGGTCTGGGCCACTTTAAATAGTTATTAGGCCCAGAGCGTCTTGGTCGGTATTACCGGCTGGGGGTTAAC	AATAA	TAATA	82	CGTAGTCTG	AGCTTCAGG	AGCACATCA	TTGGTAGAC
sp-31453	AGTGGTCTGGGCCACTTTAAATAGTTATTAGGCCCAGAGCGGCAGGGTTCTTCCCTGCGTTAAC	AATAA	TAATA	74	TGTGAATCG	AAATTGCGG	GTGTCTGAA	GTTGCTAAC
sp-31511	AGTGGTCTGGGCCACTATAAACGTAATTAGGCCCAGAGCGTCCCGGCAGCTGCCGGGGGTTTAG	AATAA	CAGTT	74	CTGGAACTG	AGATCACGA	AATCCGCCA	CCATATCAG
sp-31512	AGTGGTCTGGGCCACTATAAACGTAATTAGGCCCAGAGCGTCTTGGTCGGTATTACCGGCTGGGGGTTTAG	AATAA	CAGTT	81	CCCTATTGA	CATATGGCA	AAAAGCTGC	GAGATGCCT
sp-31513	AGTGGTCTGGGCCACTATAAACGTAATTAGGCCCAGAGCGGCAGGGTTCTTCCCTGCGTTTAG	AATAA	CAGTT	73	GCTTAAGCC	ATACCGTCG	TAGTCGAGC	TTGCGTTGA
sp-31521	AGTGGTCTGGGCCACTATAAACGGCTTTAGGCCCAGAGCGTCCCGGCAGCTGCCGGGGGTAGTC	AATAA	AAAAA	74	ACAGGTAGC	CGTAATGGC	TGGCAGATG	CACATGGCT
sp-31522	AGTGGTCTGGGCCACTATAAACGGCTTTAGGCCCAGAGCGTCTTGGTCGGTATTACCGGCTGGGGGTAGTC	AATAA	AAAAA	81	GTATACGAG	CTGCCTAAC	GTCTTACGT	CGTCTATTG
sp-31523	AGTGGTCTGGGCCACTATAAACGGCTTTAGGCCCAGAGCGGCAGGGTTCTTCCCTGCGTAGTC	AATAA	AAAAA	73	ACTTCGCTC	AACATTCCG	CGAAAGGAA	CACAGCCTA
sp-31531	AGTGGTCTGGGCCACTATAAACGACATTAGGCCCAGAGCGTCCCGGCAGCTGCCGGGGGTTGTA	AATAA	TAACT	74	ACGGTGTAT	GGGAGTTTT	CCAGGAATC	TGTTCGGAC
sp-31532	AGTGGTCTGGGCCACTATAAACGACATTAGGCCCAGAGCGTCTTGGTCGGTATTACCGGCTGGGGGTTGTA	AATAA	TAACT	81	ATGGGACAG	AAAGCTGGC	GCTCGTCAA	GTTGAGGAT
sp-31533	AGTGGTCTGGGCCACTATAAACGACATTAGGCCCAGAGCGGCAGGGTTCTTCCCTGCGTTGTA	AATAA	TAACT	73	GTTCGCCAT	ACGGGTAAT	GTTGTCCAG	AGTGGTTTG
sp-31541	AGTGGTCTGGGCCACTATAAACGGTGTTAGGCCCAGAGCGTCCCGGCAGCTGCCGGGGGTCACA	AATAA	TTAAT	74	AAATCCGGC	TGCCTTGGT	CCTAGATCG	ATGTCACTC
sp-31542	AGTGGTCTGGGCCACTATAAACGGTGTTAGGCCCAGAGCGTCTTGGTCGGTATTACCGGCTGGGGGTCACA	AATAA	TTAAT	81	TGCACCAAT	CGGAAAAAC	GATAGCTTC	AGGCAGGAA
sp-31543	AGTGGTCTGGGCCACTATAAACGGTGTTAGGCCCAGAGCGGCAGGGTTCTTCCCTGCGTCACA	AATAA	TTAAT	73	CTTCATCCA	CAGTGGTAG	ATGGAAGTG	GGTACAACA
sp-31551	AGTGGTCTGGGCCACTATAAACGTTATTAGGCCCAGAGCGTCCCGGCAGCTGCCGGGGGTTAAC	AATAA	TAATA	74	ATGCCACTA	CTGGCATAT	TGGCATCTG	AGCCTAATG
sp-31552	AGTGGTCTGGGCCACTATAAACGTTATTAGGCCCAGAGCGTCTTGGTCGGTATTACCGGCTGGGGGTTAAC	AATAA	TAATA	81	CACTCAAGT	TCGATCTGA	AGCACTCTC	CTACAGATC
sp-31553	AGTGGTCTGGGCCACTATAAACGTTATTAGGCCCAGAGCGGCAGGGTTCTTCCCTGCGTTAAC	AATAA	TAATA	73	TTCCGATCT	GGAAGGCAA	TAGTCCAGG	GACCTATCT
sp-32111	AGTGGTCTGAGCCACTATAAATAGTAATTAAGCTCAGAGCGTCCCGGCAGCTGCCGGGGGTTTAG	AATAA	CAGTT	75	TGCATTGAC	CACTCGGAA	GCTAGTGTC	TTGACCACC
sp-32112	AGTGGTCTGAGCCACTATAAATAGTAATTAAGCTCAGAGCGTCTTGGTCGGTATTACCGGCTGGGGGTTTAG	AATAA	CAGTT	82	CGAGTTTAC	AGCTAGACT	ATATGGGGA	ACATTGCAC
sp-32113	AGTGGTCTGAGCCACTATAAATAGTAATTAAGCTCAGAGCGGCAGGGTTCTTCCCTGCGTTTAG	AATAA	CAGTT	74	CTTTAACCC	TGGACTTGT	CAGAAACAC	GTCGAATCC
sp-32121	AGTGGTCTGAGCCACTATAAATAGGCTTTAAGCTCAGAGCGTCCCGGCAGCTGCCGGGGGTAGTC	AATAA	AAAAA	75	ACCTAGACA	AGAGGCATT	TTCTGGTGC	GACTTACGA
sp-32122	AGTGGTCTGAGCCACTATAAATAGGCTTTAAGCTCAGAGCGTCTTGGTCGGTATTACCGGCTGGGGGTAGTC	AATAA	AAAAA	82	TTGAGCAAC	CTTTAGCGA	TAACTCCTC	TTGAGGGAC
sp-32123	AGTGGTCTGAGCCACTATAAATAGGCTTTAAGCTCAGAGCGGCAGGGTTCTTCCCTGCGTAGTC	AATAA	AAAAA	74	ACCTTCTAG	TCGAGAGTA	TTACCCCCA	CACGGTAAG
sp-32131	AGTGGTCTGAGCCACTATAAATAGACATTAAGCTCAGAGCGTCCCGGCAGCTGCCGGGGGTTGTA	AATAA	TAACT	75	TTTTCGCCT	TAGGAGACC	GAGCTATGG	TGAAGACGT
sp-32132	AGTGGTCTGAGCCACTATAAATAGACATTAAGCTCAGAGCGTCTTGGTCGGTATTACCGGCTGGGGGTTGTA	AATAA	TAACT	82	CACAAGTGT	TGCATCATG	AGGTACATG	AGACCAATG
sp-32133	AGTGGTCTGAGCCACTATAAATAGACATTAAGCTCAGAGCGGCAGGGTTCTTCCCTGCGTTGTA	AATAA	TAACT	74	GTTGAGCAA	TACCTCAGA	AGGTCATCG	GACCGAATC
sp-32141	AGTGGTCTGAGCCACTATAAATAGGTGTTAAGCTCAGAGCGTCCCGGCAGCTGCCGGGGGTCACA	AATAA	TTAAT	75	CCATCAGAT	GTCATGAGC	CGCAAACTG	GGTGGTCAA
sp-32142	AGTGGTCTGAGCCACTATAAATAGGTGTTAAGCTCAGAGCGTCTTGGTCGGTATTACCGGCTGGGGGTCACA	AATAA	TTAAT	82	CAACGCTCT	AGTCTATCG	GATGTCCAT	ACGTCGAGT
sp-32143	AGTGGTCTGAGCCACTATAAATAGGTGTTAAGCTCAGAGCGGCAGGGTTCTTCCCTGCGTCACA	AATAA	TTAAT	74	CAAGCAAAG	ATGATCCGG	TCATTGCCC	GAGGGAGAT
sp-32151	AGTGGTCTGAGCCACTATAAATAGTTATTAAGCTCAGAGCGTCCCGGCAGCTGCCGGGGGTTAAC	AATAA	TAATA	75	CGAGGTTAG	GCAACCGAT	GCTCGAAGA	AGGTGGTTA
sp-32152	AGTGGTCTGAGCCACTATAAATAGTTATTAAGCTCAGAGCGTCTTGGTCGGTATTACCGGCTGGGGGTTAAC	AATAA	TAATA	82	TTCAGTGCT	CCCATTTTC	ATAACGGAG	TTACCTGCC
sp-32153	AGTGGTCTGAGCCACTATAAATAGTTATTAAGCTCAGAGCGGCAGGGTTCTTCCCTGCGTTAAC	AATAA	TAATA	74	GGTTTGACA	GTGTGAAGT	GCCTTCTCA	TCGCATTGA
sp-32211	AGTGGTCTGAGCCACTATAAATAGGTAATTAAGCTCAGAGCGTCCCGGCAGCTGCCGGGGGTTTAG	AATAA	CAGTT	76	TAGACGTCA	CAAATGCGC	CGTTGCATC	AACTGACAG
sp-32212	AGTGGTCTGAGCCACTATAAATAGGTAATTAAGCTCAGAGCGTCTTGGTCGGTATTACCGGCTGGGGGTTTAG	AATAA	CAGTT	83	CTTAAGGGG	AATGTCAGC	CTCCCTTGA	GGCTGTTAT
sp-32213	AGTGGTCTGAGCCACTATAAATAGGTAATTAAGCTCAGAGCGGCAGGGTTCTTCCCTGCGTTTAG	AATAA	CAGTT	75	GACATCGCA	TCCCGTATT	TACTGGACC	GACATACCT
sp-32221	AGTGGTCTGAGCCACTATAAATAGGGCTTTAAGCTCAGAGCGTCCCGGCAGCTGCCGGGGGTAGTC	AATAA	AAAAA	76	TAAGCGCCT	CCTCAAGAC	TCCGAAAGC	TGGTTCGCA
sp-32222	AGTGGTCTGAGCCACTATAAATAGGGCTTTAAGCTCAGAGCGTCTTGGTCGGTATTACCGGCTGGGGGTAGTC	AATAA	AAAAA	83	GTTCGATTC	GATCTGCGA	GCCGAAATT	AGTACCTGA
sp-32223	AGTGGTCTGAGCCACTATAAATAGGGCTTTAAGCTCAGAGCGGCAGGGTTCTTCCCTGCGTAGTC	AATAA	AAAAA	75	CTGCTAGCA	CCTGAGAAC	TTGTCGTAC	ATTGCACCC
sp-32231	AGTGGTCTGAGCCACTATAAATAGGACATTAAGCTCAGAGCGTCCCGGCAGCTGCCGGGGGTTGTA	AATAA	TAACT	76	GTGCGATAT	ACGAGGTAC	GGGGATCAT	GTCGCTTCA
sp-32232	AGTGGTCTGAGCCACTATAAATAGGACATTAAGCTCAGAGCGTCTTGGTCGGTATTACCGGCTGGGGGTTGTA	AATAA	TAACT	83	CTACCTAAG	CCCGAATGA	TGACTGCAC	ACGATACCA
sp-32233	AGTGGTCTGAGCCACTATAAATAGGACATTAAGCTCAGAGCGGCAGGGTTCTTCCCTGCGTTGTA	AATAA	TAACT	75	GAAGTTCCT	GCACTGTTG	GGACAAACA	CAGAAGGCT
sp-32241	AGTGGTCTGAGCCACTATAAATAGGGTGTTAAGCTCAGAGCGTCCCGGCAGCTGCCGGGGGTCACA	AATAA	TTAAT	76	TACATTGGC	GTGGCTATT	CTGTCAGCA	CACGTACTG
sp-32242	AGTGGTCTGAGCCACTATAAATAGGGTGTTAAGCTCAGAGCGTCTTGGTCGGTATTACCGGCTGGGGGTCACA	AATAA	TTAAT	83	TAGCGTAGC	TACGGTGAA	TCGACTTGA	CACAACCTT
sp-32243	AGTGGTCTGAGCCACTATAAATAGGGTGTTAAGCTCAGAGCGGCAGGGTTCTTCCCTGCGTCACA	AATAA	TTAAT	75	TGAGGAACT	ATGTGGTGC	AAACGGTGA	CTGTTCCCT
sp-32251	AGTGGTCTGAGCCACTATAAATAGGTTATTAAGCTCAGAGCGTCCCGGCAGCTGCCGGGGGTTAAC	AATAA	TAATA	76	GGATGTTCC	CCCCTGATA	GTCTCGGTA	ATACACCGG
sp-32252	AGTGGTCTGAGCCACTATAAATAGGTTATTAAGCTCAGAGCGTCTTGGTCGGTATTACCGGCTGGGGGTTAAC	AATAA	TAATA	83	CGATGTTGG	TCGTACTCA	TGGGAACGA	CCATGTTCC
sp-32253	AGTGGTCTGAGCCACTATAAATAGGTTATTAAGCTCAGAGCGGCAGGGTTCTTCCCTGCGTTAAC	AATAA	TAATA	75	GCGTAACTC	GTATCCATC	GCCTCAAAT	TGCAGTTTG
sp-32311	AGTGGTCTGAGCCACTGTAAATAGTAATTAAGCTCAGAGCGTCCCGGCAGCTGCCGGGGGTTTAG	AATAA	CAGTT	75	AAGGGTTCA	AACGATCTG	AGATTCCAG	ATGCAGCAA
sp-32312	AGTGGTCTGAGCCACTGTAAATAGTAATTAAGCTCAGAGCGTCTTGGTCGGTATTACCGGCTGGGGGTTTAG	AATAA	CAGTT	82	ACCTCAACG	AATCTACGC	GCATAGTTC	CAACCTTGC
sp-32313	AGTGGTCTGAGCCACTGTAAATAGTAATTAAGCTCAGAGCGGCAGGGTTCTTCCCTGCGTTTAG	AATAA	CAGTT	74	TCCTAGCGA	CTAGGACGT	CTCTCTTTG	GAGCATATG
sp-32321	AGTGGTCTGAGCCACTGTAAATAGGCTTTAAGCTCAGAGCGTCCCGGCAGCTGCCGGGGGTAGTC	AATAA	AAAAA	75	AGTTAGCGA	CGTAGTAAG	TCTAACCAG	CGTGAACCT
sp-32322	AGTGGTCTGAGCCACTGTAAATAGGCTTTAAGCTCAGAGCGTCTTGGTCGGTATTACCGGCTGGGGGTAGTC	AATAA	AAAAA	82	TACTGGTGT	ACGTATCGA	ACAGAGGCA	TCGGAACTA
sp-32323	AGTGGTCTGAGCCACTGTAAATAGGCTTTAAGCTCAGAGCGGCAGGGTTCTTCCCTGCGTAGTC	AATAA	AAAAA	74	CGTTTTGAC	GGCTCATTA	ATAGTCTCC	GGCAAGTGT
sp-32331	AGTGGTCTGAGCCACTGTAAATAGACATTAAGCTCAGAGCGTCCCGGCAGCTGCCGGGGGTTGTA	AATAA	TAACT	75	TCCAGGTTT	AGCATAGGA	CCTTCACAA	AGTAACGTG
sp-32332	AGTGGTCTGAGCCACTGTAAATAGACATTAAGCTCAGAGCGTCTTGGTCGGTATTACCGGCTGGGGGTTGTA	AATAA	TAACT	82	CGTGAAAGG	CAAGTTTGC	GAGCAAAGC	CGATGAGAT
sp-32333	AGTGGTCTGAGCCACTGTAAATAGACATTAAGCTCAGAGCGGCAGGGTTCTTCCCTGCGTTGTA	AATAA	TAACT	74	CAATGGCGT	GGACGATGT	AGCGACGAA	TTGGGATCG
sp-32341	AGTGGTCTGAGCCACTGTAAATAGGTGTTAAGCTCAGAGCGTCCCGGCAGCTGCCGGGGGTCACA	AATAA	TTAAT	75	TTCGCCGTT	ACAAGAGTG	GTGATCTGA	ACGAAAGAG
sp-32342	AGTGGTCTGAGCCACTGTAAATAGGTGTTAAGCTCAGAGCGTCTTGGTCGGTATTACCGGCTGGGGGTCACA	AATAA	TTAAT	82	CGAAGGTTC	TCTTCACAC	AGCACGCAA	TGATCTTCG
sp-32343	AGTGGTCTGAGCCACTGTAAATAGGTGTTAAGCTCAGAGCGGCAGGGTTCTTCCCTGCGTCACA	AATAA	TTAAT	74	TCGCGTGAT	AGCAAGATC	AAGGAGGCA	TACCGAGTT
sp-32351	AGTGGTCTGAGCCACTGTAAATAGTTATTAAGCTCAGAGCGTCCCGGCAGCTGCCGGGGGTTAAC	AATAA	TAATA	75	CTGATGTTG	GATGAACTC	CGAATCAGA	TCGCATCTT
sp-32352	AGTGGTCTGAGCCACTGTAAATAGTTATTAAGCTCAGAGCGTCTTGGTCGGTATTACCGGCTGGGGGTTAAC	AATAA	TAATA	82	CAGAGCATT	AAACCCGAT	TATCGCAGC	CCTCAAACC
sp-32353	AGTGGTCTGAGCCACTGTAAATAGTTATTAAGCTCAGAGCGGCAGGGTTCTTCCCTGCGTTAAC	AATAA	TAATA	74	TTGGCGTTG	GATCACTGA	TGGTACCAT	TCGAAGCTA
sp-32411	AGTGGTCTGAGCCACTTTAAATAGTAATTAAGCTCAGAGCGTCCCGGCAGCTGCCGGGGGTTTAG	AATAA	CAGTT	75	ACTACGTCT	CGTAGGCAA	CAACGAGTA	TTGGGCTAA
sp-32412	AGTGGTCTGAGCCACTTTAAATAGTAATTAAGCTCAGAGCGTCTTGGTCGGTATTACCGGCTGGGGGTTTAG	AATAA	CAGTT	82	CGAATCTGT	GCGCTGAAT	GGGAAAACT	CATCCAATC
sp-32413	AGTGGTCTGAGCCACTTTAAATAGTAATTAAGCTCAGAGCGGCAGGGTTCTTCCCTGCGTTTAG	AATAA	CAGTT	74	GTCCTGTCA	AAATCACGC	CAATGTTGC	CCAAGTCGA
sp-32421	AGTGGTCTGAGCCACTTTAAATAGGCTTTAAGCTCAGAGCGTCCCGGCAGCTGCCGGGGGTAGTC	AATAA	AAAAA	75	ACGCTTTCC	TAGCGAGAG	AAGCCAGGA	AACCATCTC
sp-32422	AGTGGTCTGAGCCACTTTAAATAGGCTTTAAGCTCAGAGCGTCTTGGTCGGTATTACCGGCTGGGGGTAGTC	AATAA	AAAAA	82	TGGTCAGGA	GACACAAGA	CCGCCTTTT	ACTGGTTCA
sp-32423	AGTGGTCTGAGCCACTTTAAATAGGCTTTAAGCTCAGAGCGGCAGGGTTCTTCCCTGCGTAGTC	AATAA	AAAAA	74	AGTGATCTC	AGGCCACTT	AGCTACCAG	GAGTCAGAT
sp-32431	AGTGGTCTGAGCCACTTTAAATAGACATTAAGCTCAGAGCGTCCCGGCAGCTGCCGGGGGTTGTA	AATAA	TAACT	75	TTTGGGGGT	GTAGCGTCA	GAACCATCA	TGACGTTAG
sp-32432	AGTGGTCTGAGCCACTTTAAATAGACATTAAGCTCAGAGCGTCTTGGTCGGTATTACCGGCTGGGGGTTGTA	AATAA	TAACT	82	AACCACTCC	TGCCCTTAG	TGTTGACAG	GGGACGATT
sp-32433	AGTGGTCTGAGCCACTTTAAATAGACATTAAGCTCAGAGCGGCAGGGTTCTTCCCTGCGTTGTA	AATAA	TAACT	74	TCAGCCACT	TATAGAGCG	ATCACCACG	TGCGTTCAG
sp-32441	AGTGGTCTGAGCCACTTTAAATAGGTGTTAAGCTCAGAGCGTCCCGGCAGCTGCCGGGGGTCACA	AATAA	TTAAT	75	CGCTATAGG	TCCCATGAA	GACCCTCAT	AAAAGACGG
sp-32442	AGTGGTCTGAGCCACTTTAAATAGGTGTTAAGCTCAGAGCGTCTTGGTCGGTATTACCGGCTGGGGGTCACA	AATAA	TTAAT	82	TCGAGGGAA	CCAGTTCTG	TCGTATCTC	GTGAGAGAT
sp-32443	AGTGGTCTGAGCCACTTTAAATAGGTGTTAAGCTCAGAGCGGCAGGGTTCTTCCCTGCGTCACA	AATAA	TTAAT	74	GTCTTCTCC	GACCTCTGT	CTTCCCTTA	AAGGTCCAG
sp-32451	AGTGGTCTGAGCCACTTTAAATAGTTATTAAGCTCAGAGCGTCCCGGCAGCTGCCGGGGGTTAAC	AATAA	TAATA	75	TCGAATGAG	CGGACTTTA	GACTCTGAT	GTAAGGCTA
sp-32452	AGTGGTCTGAGCCACTTTAAATAGTTATTAAGCTCAGAGCGTCTTGGTCGGTATTACCGGCTGGGGGTTAAC	AATAA	TAATA	82	TGTGCTCTC	ACGAGGTTA	CGATGCTGT	TGCGACGTA
sp-32453	AGTGGTCTGAGCCACTTTAAATAGTTATTAAGCTCAGAGCGGCAGGGTTCTTCCCTGCGTTAAC	AATAA	TAATA	74	ATCTCCAGA	TTTCACCTG	GCCACAGAT	AAAACGTGC
sp-32511	AGTGGTCTGAGCCACTATAAACGTAATTAAGCTCAGAGCGTCCCGGCAGCTGCCGGGGGTTTAG	AATAA	CAGTT	74	GAAGGAACG	GGACCCTTT	CCAAAGGTT	GCATCGTAG
sp-32512	AGTGGTCTGAGCCACTATAAACGTAATTAAGCTCAGAGCGTCTTGGTCGGTATTACCGGCTGGGGGTTTAG	AATAA	CAGTT	81	CTCTTCCTA	CCATGAGTG	CGCAATAAG	CAAGCTCAT
sp-32513	AGTGGTCTGAGCCACTATAAACGTAATTAAGCTCAGAGCGGCAGGGTTCTTCCCTGCGTTTAG	AATAA	CAGTT	73	GTCTCAAAG	CACGCTGTA	TGTCACAAC	TTGTCCCTG
sp-32521	AGTGGTCTGAGCCACTATAAACGGCTTTAAGCTCAGAGCGTCCCGGCAGCTGCCGGGGGTAGTC	AATAA	AAAAA	74	GCCTATTAC	TCGTGATCG	GCGCAATCT	CAGTCTGTT
sp-32522	AGTGGTCTGAGCCACTATAAACGGCTTTAAGCTCAGAGCGTCTTGGTCGGTATTACCGGCTGGGGGTAGTC	AATAA	AAAAA	81	AACAGACCT	GAGATATCC	ACTTTGGCG	AGGGTGGAA
sp-32523	AGTGGTCTGAGCCACTATAAACGGCTTTAAGCTCAGAGCGGCAGGGTTCTTCCCTGCGTAGTC	AATAA	AAAAA	73	TTGTCGGAA	GGAATGTTC	TAAAAGGCG	ATATCCCGA
sp-32531	AGTGGTCTGAGCCACTATAAACGACATTAAGCTCAGAGCGTCCCGGCAGCTGCCGGGGGTTGTA	AATAA	TAACT	74	GGCGTTAAC	TGCAAGGAC	GTCTTTTCG	TCAGCATCA
sp-32532	AGTGGTCTGAGCCACTATAAACGACATTAAGCTCAGAGCGTCTTGGTCGGTATTACCGGCTGGGGGTTGTA	AATAA	TAACT	81	TCCCTACGA	GGTTTTCCG	GGAGGTCTA	TACCTTAGC
sp-32533	AGTGGTCTGAGCCACTATAAACGACATTAAGCTCAGAGCGGCAGGGTTCTTCCCTGCGTTGTA	AATAA	TAACT	73	GTACTAGCG	CCGTCTAAC	AGTTGGCCT	GTAGGTGAC
sp-32541	AGTGGTCTGAGCCACTATAAACGGTGTTAAGCTCAGAGCGTCCCGGCAGCTGCCGGGGGTCACA	AATAA	TTAAT	74	ATGGGAGAA	GAGTGGCAA	TAATGAGCG	GCGGTACTT
sp-32542	AGTGGTCTGAGCCACTATAAACGGTGTTAAGCTCAGAGCGTCTTGGTCGGTATTACCGGCTGGGGGTCACA	AATAA	TTAAT	81	ACCTCACAT	GATGAGGAG	GCTAGAGAT	ATCGGAAGT
sp-32543	AGTGGTCTGAGCCACTATAAACGGTGTTAAGCTCAGAGCGGCAGGGTTCTTCCCTGCGTCACA	AATAA	TTAAT	73	CAATCAGCA	AGTCACGTC	ACACGATGC	CACCCAACA
sp-32551	AGTGGTCTGAGCCACTATAAACGTTATTAAGCTCAGAGCGTCCCGGCAGCTGCCGGGGGTTAAC	AATAA	TAATA	74	CAGTATCCC	GCGTGTAAA	AGCGTAGTT	GGGCATAAA
sp-32552	AGTGGTCTGAGCCACTATAAACGTTATTAAGCTCAGAGCGTCTTGGTCGGTATTACCGGCTGGGGGTTAAC	AATAA	TAATA	81	GGGTAGTTA	GGGGTATAC	GTGTGCTTC	TGGTAACGG
sp-32553	AGTGGTCTGAGCCACTATAAACGTTATTAAGCTCAGAGCGGCAGGGTTCTTCCCTGCGTTAAC	AATAA	TAATA	73	GCTTATGTG	AAGCGGAAC	TATAGGCCG	ACGAGTACG
sp-33111	AGTGGTCATAGCCACTATAAATAGTAATTAAGCTATGAGCGTCCCGGCAGCTGCCGGGGGTTTAG	AATAA	CAGTT	75	ACCAGTAAC	TATCACCTC	AAACTCGCT	GTCGATGCT
sp-33112	AGTGGTCATAGCCACTATAAATAGTAATTAAGCTATGAGCGTCTTGGTCGGTATTACCGGCTGGGGGTTTAG	AATAA	CAGTT	82	CTTCATCGG	TCTAGTGGT	AATGATCGG	GTTCGAGAA
sp-33113	AGTGGTCATAGCCACTATAAATAGTAATTAAGCTATGAGCGGCAGGGTTCTTCCCTGCGTTTAG	AATAA	CAGTT	74	GAGTACACG	GTGACAACC	GACGAATGT	GGGTGTTTC
sp-33121	AGTGGTCATAGCCACTATAAATAGGCTTTAAGCTATGAGCGTCCCGGCAGCTGCCGGGGGTAGTC	AATAA	AAAAA	75	CCTAGGCTA	CCTAATGGA	CTGGATGTG	CATGGGAGA
sp-33122	AGTGGTCATAGCCACTATAAATAGGCTTTAAGCTATGAGCGTCTTGGTCGGTATTACCGGCTGGGGGTAGTC	AATAA	AAAAA	82	TCCGCTATA	AGCACCGAA	CGTGTTAAC	CGGCGTAAT
sp-33123	AGTGGTCATAGCCACTATAAATAGGCTTTAAGCTATGAGCGGCAGGGTTCTTCCCTGCGTAGTC	AATAA	AAAAA	74	TACAATCGG	AGGTTACCG	CTGGCACAA	CGGAGAATT
sp-33131	AGTGGTCATAGCCACTATAAATAGACATTAAGCTATGAGCGTCCCGGCAGCTGCCGGGGGTTGTA	AATAA	TAACT	75	TACTGACAC	TTTTGCCCC	CCATCTTGC	CGAAACCAC
sp-33132	AGTGGTCATAGCCACTATAAATAGACATTAAGCTATGAGCGTCTTGGTCGGTATTACCGGCTGGGGGTTGTA	AATAA	TAACT	82	GATGACGTT	TTCCTACAG	TACAGGGGA	CTGTGTCCT
sp-33133	AGTGGTCATAGCCACTATAAATAGACATTAAGCTATGAGCGGCAGGGTTCTTCCCTGCGTTGTA	AATAA	TAACT	74	ACATGAACC	TCTGACACG	ACAAGCTCA	TCTGGTGAC
sp-33141	AGTGGTCATAGCCACTATAAATAGGTGTTAAGCTATGAGCGTCCCGGCAGCTGCCGGGGGTCACA	AATAA	TTAAT	75	GAGAAAGGG	ATTGTGGGC	AGGAAGTCA	TGAATGCTG
sp-33142	AGTGGTCATAGCCACTATAAATAGGTGTTAAGCTATGAGCGTCTTGGTCGGTATTACCGGCTGGGGGTCACA	AATAA	TTAAT	82	CAACTGCTA	ACAATCGCT	TACACGGAG	TTGACGTCC
sp-33143	AGTGGTCATAGCCACTATAAATAGGTGTTAAGCTATGAGCGGCAGGGTTCTTCCCTGCGTCACA	AATAA	TTAAT	74	GAGAAGGTC	CGATATCGG	GTCGCCTAT	GGTTGACTA
sp-33151	AGTGGTCATAGCCACTATAAATAGTTATTAAGCTATGAGCGTCCCGGCAGCTGCCGGGGGTTAAC	AATAA	TAATA	75	TCAGTCAGT	GGGAAGAGA	CAAGTCTCA	CTGGACGTT
sp-33152	AGTGGTCATAGCCACTATAAATAGTTATTAAGCTATGAGCGTCTTGGTCGGTATTACCGGCTGGGGGTTAAC	AATAA	TAATA	82	AGGAAAAGG	ATTCGCTGA	TAAGACCCC	ACTCCAGAG
sp-33153	AGTGGTCATAGCCACTATAAATAGTTATTAAGCTATGAGCGGCAGGGTTCTTCCCTGCGTTAAC	AATAA	TAATA	74	ACGGCTGTT	CATTACCCA	TAACAACCG	CGTATCGAG
sp-33211	AGTGGTCATAGCCACTATAAATAGGTAATTAAGCTATGAGCGTCCCGGCAGCTGCCGGGGGTTTAG	AATAA	CAGTT	76	TACGATTCG	TGACGTCCA	GGTGAACAC	CCACGATCT
sp-33212	AGTGGTCATAGCCACTATAAATAGGTAATTAAGCTATGAGCGTCTTGGTCGGTATTACCGGCTGGGGGTTTAG	AATAA	CAGTT	83	GAACATGCA	ACAGCTGAT	CGCACATAC	ACGAGTTGA
sp-33213	AGTGGTCATAGCCACTATAAATAGGTAATTAAGCTATGAGCGGCAGGGTTCTTCCCTGCGTTTAG	AATAA	CAGTT	75	AGCTGGCAA	CGAAGACAT	TATCGGAAC	CTCAATGGC
sp-33221	AGTGGTCATAGCCACTATAAATAGGGCTTTAAGCTATGAGCGTCCCGGCAGCTGCCGGGGGTAGTC	AATAA	AAAAA	76	ACATGCTGG	GGAACGGAT	CCACGTATT	CCAGGTCAA
sp-33222	AGTGGTCATAGCCACTATAAATAGGGCTTTAAGCTATGAGCGTCTTGGTCGGTATTACCGGCTGGGGGTAGTC	AATAA	AAAAA	83	TGGCGTTGT	TCACGTTGG	TTGTCAGCC	ATACCCATG
sp-33223	AGTGGTCATAGCCACTATAAATAGGGCTTTAAGCTATGAGCGGCAGGGTTCTTCCCTGCGTAGTC	AATAA	AAAAA	75	CCGTTAGTA	GCGCCAATT	CCGAGTGTA	CTCTGGATT
sp-33231	AGTGGTCATAGCCACTATAAATAGGACATTAAGCTATGAGCGTCCCGGCAGCTGCCGGGGGTTGTA	AATAA	TAACT	76	ACATACGTC	CTCAGCGTT	GGGACATTA	CAGGGTGAA
sp-33232	AGTGGTCATAGCCACTATAAATAGGACATTAAGCTATGAGCGTCTTGGTCGGTATTACCGGCTGGGGGTTGTA	AATAA	TAACT	83	GAACGCAAG	GTGTGCCTA	GTAATCGCG	TTTAGCCGT
sp-33233	AGTGGTCATAGCCACTATAAATAGGACATTAAGCTATGAGCGGCAGGGTTCTTCCCTGCGTTGTA	AATAA	TAACT	75	CGCAATCCA	TTCTGCCAA	GGCTACAAA	ACCTGACTA
sp-33241	AGTGGTCATAGCCACTATAAATAGGGTGTTAAGCTATGAGCGTCCCGGCAGCTGCCGGGGGTCACA	AATAA	TTAAT	76	CTCCATGGT	CACTCAGAG	AACCAACGG	CCAGCCTTT
sp-33242	AGTGGTCATAGCCACTATAAATAGGGTGTTAAGCTATGAGCGTCTTGGTCGGTATTACCGGCTGGGGGTCACA	AATAA	TTAAT	83	CTTGGACCA	CGGCCAAAT	GGTGATCGT	CTATCGCAA
sp-33243	AGTGGTCATAGCCACTATAAATAGGGTGTTAAGCTATGAGCGGCAGGGTTCTTCCCTGCGTCACA	AATAA	TTAAT	75	CTGATCCTT	CCTCACATG	TACCACTCT	CTAGTCACA
sp-33251	AGTGGTCATAGCCACTATAAATAGGTTATTAAGCTATGAGCGTCCCGGCAGCTGCCGGGGGTTAAC	AATAA	TAATA	76	ATCCGGTTT	GTTGTAACG	ACCTGTGAC	GGTACAAAG
sp-33252	AGTGGTCATAGCCACTATAAATAGGTTATTAAGCTATGAGCGTCTTGGTCGGTATTACCGGCTGGGGGTTAAC	AATAA	TAATA	83	TTCCTTCAC	TAACTCGGT	AGACCGAAC	AGCTGACTC
sp-33253	AGTGGTCATAGCCACTATAAATAGGTTATTAAGCTATGAGCGGCAGGGTTCTTCCCTGCGTTAAC	AATAA	TAATA	75	CACGGTTCA	CCCTATGCT	GATCCCCTA	GCACTCGTA
sp-33311	AGTGGTCATAGCCACTGTAAATAGTAATTAAGCTATGAGCGTCCCGGCAGCTGCCGGGGGTTTAG	AATAA	CAGTT	75	CCGCTTAAG	ACGATCACG	TCGGTTGTA	CTGGCGAAT
sp-33312	AGTGGTCATAGCCACTGTAAATAGTAATTAAGCTATGAGCGTCTTGGTCGGTATTACCGGCTGGGGGTTTAG	AATAA	CAGTT	82	TGGGTGTGT	TGTGCATTC	CCAACCGAA	TTACCAACG
sp-33313	AGTGGTCATAGCCACTGTAAATAGTAATTAAGCTATGAGCGGCAGGGTTCTTCCCTGCGTTTAG	AATAA	CAGTT	74	GAGATTACC	GTAAGTCGA	TCAAGCACG	ATGAGTGGC
sp-33321	AGTGGTCATAGCCACTGTAAATAGGCTTTAAGCTATGAGCGTCCCGGCAGCTGCCGGGGGTAGTC	AATAA	AAAAA	75	TGCGACCTT	GCACAGTAC	GACCCTAAG	CTCCGAGAT
sp-33322	AGTGGTCATAGCCACTGTAAATAGGCTTTAAGCTATGAGCGTCTTGGTCGGTATTACCGGCTGGGGGTAGTC	AATAA	AAAAA	82	CGGGTAGTT	TTTCCTCTG	TGGATCCGA	CGGCATATA
sp-33323	AGTGGTCATAGCCACTGTAAATAGGCTTTAAGCTATGAGCGGCAGGGTTCTTCCCTGCGTAGTC	AATAA	AAAAA	74	ATTCTCGGG	TTGGTATGG	ACCAGGAGT	AGTTGAGTG
sp-33331	AGTGGTCATAGCCACTGTAAATAGACATTAAGCTATGAGCGTCCCGGCAGCTGCCGGGGGTTGTA	AATAA	TAACT	75	ATTACCCAC	ACACAAGTG	TTTCGCTGC	ACCCTAGTC
sp-33332	AGTGGTCATAGCCACTGTAAATAGACATTAAGCTATGAGCGTCTTGGTCGGTATTACCGGCTGGGGGTTGTA	AATAA	TAACT	82	CCTAACACC	CTATCTCGT	ATCCTTCCC	TCTTACCGT
sp-33333	AGTGGTCATAGCCACTGTAAATAGACATTAAGCTATGAGCGGCAGGGTTCTTCCCTGCGTTGTA	AATAA	TAACT	74	GGGAATGCA	GACGATACG	GAGTTATCG	GAGATACAC
sp-33341	AGTGGTCATAGCCACTGTAAATAGGTGTTAAGCTATGAGCGTCCCGGCAGCTGCCGGGGGTCACA	AATAA	TTAAT	75	ATGGCTCAT	TGAACCGTC	AGTGCATCG	ATGCCGCAT
sp-33342	AGTGGTCATAGCCACTGTAAATAGGTGTTAAGCTATGAGCGTCTTGGTCGGTATTACCGGCTGGGGGTCACA	AATAA	TTAAT	82	TTAGCCCTG	GGTATCGTG	TAACTACGC	CGCAAGTAC
sp-33343	AGTGGTCATAGCCACTGTAAATAGGTGTTAAGCTATGAGCGGCAGGGTTCTTCCCTGCGTCACA	AATAA	TTAAT	74	GTCGGATCA	TCTACACTC	ATGGTGGGT	GATCGTCCA
sp-33351	AGTGGTCATAGCCACTGTAAATAGTTATTAAGCTATGAGCGTCCCGGCAGCTGCCGGGGGTTAAC	AATAA	TAATA	75	CCTCAGGAA	GTTCGTACG	ATGAGGACT	TGACTTCGC
sp-33352	AGTGGTCATAGCCACTGTAAATAGTTATTAAGCTATGAGCGTCTTGGTCGGTATTACCGGCTGGGGGTTAAC	AATAA	TAATA	82	ATGGAATGC	TGGCAACAC	TATGGACTG	GTGAGTGTA
sp-33353	AGTGGTCATAGCCACTGTAAATAGTTATTAAGCTATGAGCGGCAGGGTTCTTCCCTGCGTTAAC	AATAA	TAATA	74	TCTACGACC	TATTACGCG	CCGATGCAT	CCTTAGGAG
sp-33411	AGTGGTCATAGCCACTTTAAATAGTAATTAAGCTATGAGCGTCCCGGCAGCTGCCGGGGGTTTAG	AATAA	CAGTT	75	CCCATAGGT	CACTGTCCA	GGTGCTTAA	CGAACTTGA
sp-33412	AGTGGTCATAGCCACTTTAAATAGTAATTAAGCTATGAGCGTCTTGGTCGGTATTACCGGCTGGGGGTTTAG	AATAA	CAGTT	82	CGAGTGGTT	GTGCATGCT	CTTGAGAGA	AATCGGGCA
sp-33413	AGTGGTCATAGCCACTTTAAATAGTAATTAAGCTATGAGCGGCAGGGTTCTTCCCTGCGTTTAG	AATAA	CAGTT	74	TCATAGACC	ATCTCGGGA	GTAAAAGGC	GCACCAATA
sp-33421	AGTGGTCATAGCCACTTTAAATAGGCTTTAAGCTATGAGCGTCCCGGCAGCTGCCGGGGGTAGTC	AATAA	AAAAA	75	ACTTGCCGT	AGAGGTTGC	GCTGGTATC	TACCTGTCC
sp-33422	AGTGGTCATAGCCACTTTAAATAGGCTTTAAGCTATGAGCGTCTTGGTCGGTATTACCGGCTGGGGGTAGTC	AATAA	AAAAA	82	AGTCTTGGA	CTTGTGTAG	AGGGGTGAA	GGGTACATT
sp-33423	AGTGGTCATAGCCACTTTAAATAGGCTTTAAGCTATGAGCGGCAGGGTTCTTCCCTGCGTAGTC	AATAA	AAAAA	74	GGGGTGATA	AGCCGAAAT	CCGACTCTA	ATCCGTGGA
sp-33431	AGTGGTCATAGCCACTTTAAATAGACATTAAGCTATGAGCGTCCCGGCAGCTGCCGGGGGTTGTA	AATAA	TAACT	75	AGCCACAAA	GAATGGTGG	TAGTGGGTA	GCTTTCTCG
sp-33432	AGTGGTCATAGCCACTTTAAATAGACATTAAGCTATGAGCGTCTTGGTCGGTATTACCGGCTGGGGGTTGTA	AATAA	TAACT	82	TGCAGGATT	TAGCCGATC	AGGTACTGT	CAGGGACAA
sp-33433	AGTGGTCATAGCCACTTTAAATAGACATTAAGCTATGAGCGGCAGGGTTCTTCCCTGCGTTGTA	AATAA	TAACT	74	GCCTGATTA	GTACGAAGC	GCCTAGTCA	GGGGAATAA
sp-33441	AGTGGTCATAGCCACTTTAAATAGGTGTTAAGCTATGAGCGTCCCGGCAGCTGCCGGGGGTCACA	AATAA	TTAAT	75	GTATTCGCC	AAGCCTTTC	CAAACTGGG	CATCCGAAG
sp-33442	AGTGGTCATAGCCACTTTAAATAGGTGTTAAGCTATGAGCGTCTTGGTCGGTATTACCGGCTGGGGGTCACA	AATAA	TTAAT	82	TCGACTGAT	CACACCAAA	ACCTAACTC	AAGGACAGT
sp-33443	AGTGGTCATAGCCACTTTAAATAGGTGTTAAGCTATGAGCGGCAGGGTTCTTCCCTGCGTCACA	AATAA	TTAAT	74	GAAGGTTAC	ACACAACGG	CGGAGTAAA	CTGCTGTAC
sp-33451	AGTGGTCATAGCCACTTTAAATAGTTATTAAGCTATGAGCGTCCCGGCAGCTGCCGGGGGTTAAC	AATAA	TAATA	75	CTAGGGATA	CCAAGTCAT	GTAAACGCA	TGCCAATCT
sp-33452	AGTGGTCATAGCCACTTTAAATAGTTATTAAGCTATGAGCGTCTTGGTCGGTATTACCGGCTGGGGGTTAAC	AATAA	TAATA	82	GTATCTAGC	TCGAGGATA	ATACCTGCA	AGGGTACTG
sp-33453	AGTGGTCATAGCCACTTTAAATAGTTATTAAGCTATGAGCGGCAGGGTTCTTCCCTGCGTTAAC	AATAA	TAATA	74	TTTAGTGGG	ACGCTTGAT	GGTGATAGC	GCTCTTCTT
sp-33511	AGTGGTCATAGCCACTATAAACGTAATTAAGCTATGAGCGTCCCGGCAGCTGCCGGGGGTTTAG	AATAA	CAGTT	74	GTATTGCCT	ATAGCCGCT	CAGGAAACT	GCAGTTACA
sp-33512	AGTGGTCATAGCCACTATAAACGTAATTAAGCTATGAGCGTCTTGGTCGGTATTACCGGCTGGGGGTTTAG	AATAA	CAGTT	81	TCGTGAGAT	AGATAGGCA	CTCGTTGAT	CCTATACTG
sp-33513	AGTGGTCATAGCCACTATAAACGTAATTAAGCTATGAGCGGCAGGGTTCTTCCCTGCGTTTAG	AATAA	CAGTT	73	CAGAGTCTG	TCGGCCTAT	TTAAGGCCC	ATGCTCACA
sp-33521	AGTGGTCATAGCCACTATAAACGGCTTTAAGCTATGAGCGTCCCGGCAGCTGCCGGGGGTAGTC	AATAA	AAAAA	74	GGCTGATTC	TCCTCCGAT	AGACCGAGA	GATAACCAC
sp-33522	AGTGGTCATAGCCACTATAAACGGCTTTAAGCTATGAGCGTCTTGGTCGGTATTACCGGCTGGGGGTAGTC	AATAA	AAAAA	81	AACACGTGT	GATCAACCT	ATATCGCGG	CGGTGACAA
sp-33523	AGTGGTCATAGCCACTATAAACGGCTTTAAGCTATGAGCGGCAGGGTTCTTCCCTGCGTAGTC	AATAA	AAAAA	73	TTCGGAGTC	ACACCCTTA	CTTCCGAAA	ACCGTCAAC
sp-33531	AGTGGTCATAGCCACTATAAACGACATTAAGCTATGAGCGTCCCGGCAGCTGCCGGGGGTTGTA	AATAA	TAACT	74	ATTACCGGC	GAAGACAGA	CGTATAGTG	CAAACAGCC
sp-33532	AGTGGTCATAGCCACTATAAACGACATTAAGCTATGAGCGTCTTGGTCGGTATTACCGGCTGGGGGTTGTA	AATAA	TAACT	81	GTACGTACC	AGACTCTCG	AGTATCACG	TGTCCAGTC
sp-33533	AGTGGTCATAGCCACTATAAACGACATTAAGCTATGAGCGGCAGGGTTCTTCCCTGCGTTGTA	AATAA	TAACT	73	TCGACTCTC	CGAGTCTAG	GGTTCACCT	TAGCCCTTC
sp-33541	AGTGGTCATAGCCACTATAAACGGTGTTAAGCTATGAGCGTCCCGGCAGCTGCCGGGGGTCACA	AATAA	TTAAT	74	CTTCCCAAC	GCCTTTTGG	TACACTGTG	TAGGCCACT
sp-33542	AGTGGTCATAGCCACTATAAACGGTGTTAAGCTATGAGCGTCTTGGTCGGTATTACCGGCTGGGGGTCACA	AATAA	TTAAT	81	ACGGAAATC	TATCTCGAG	TGCGACATC	CCGGTTAAA
sp-33543	AGTGGTCATAGCCACTATAAACGGTGTTAAGCTATGAGCGGCAGGGTTCTTCCCTGCGTCACA	AATAA	TTAAT	73	TCTTGCCAG	GCATCCGTT	GAACCTGCT	TGTCACTTC
sp-33551	AGTGGTCATAGCCACTATAAACGTTATTAAGCTATGAGCGTCCCGGCAGCTGCCGGGGGTTAAC	AATAA	TAATA	74	GGCCATCAT	TCTAGAGGG	AGGCATCGA	TAGTCCCAG
sp-33552	AGTGGTCATAGCCACTATAAACGTTATTAAGCTATGAGCGTCTTGGTCGGTATTACCGGCTGGGGGTTAAC	AATAA	TAATA	81	CAATCAGGT	TATGGGTCC	TGTAGTGCT	AAGCCTCAT
sp-33553	AGTGGTCATAGCCACTATAAACGTTATTAAGCTATGAGCGGCAGGGTTCTTCCCTGCGTTAAC	AATAA	TAATA	73	GCCACTTGA	TTCTGCTCA	ATGGATCCC	TGTAGCGAA
sp-34111	AGTGGACTAAGCCACTATAAATAGTAATTAGGCTTAGAGCGTCCCGGCAGCTGCCGGGGGTTTAG	AATAA	CAGTT	75	ACGTTATCG	GCGGGTATA	GATAGCAGC	AGTTCTCGC
sp-34112	AGTGGACTAAGCCACTATAAATAGTAATTAGGCTTAGAGCGTCTTGGTCGGTATTACCGGCTGGGGGTTTAG	AATAA	CAGTT	82	TTCGTAGCC	TTTCGTCAG	ACAGTCCCA	AAGTTGCAC
sp-34113	AGTGGACTAAGCCACTATAAATAGTAATTAGGCTTAGAGCGGCAGGGTTCTTCCCTGCGTTTAG	AATAA	CAGTT	74	AGGCTAAGT	CAAGATGCA	TTTTCCGCT	GTCTTGCTG
sp-34121	AGTGGACTAAGCCACTATAAATAGGCTTTAGGCTTAGAGCGTCCCGGCAGCTGCCGGGGGTAGTC	AATAA	AAAAA	75	ACCTAGTCT	CAGAGTTCG	GCGTATGGA	TTTACAGGC
sp-34122	AGTGGACTAAGCCACTATAAATAGGCTTTAGGCTTAGAGCGTCTTGGTCGGTATTACCGGCTGGGGGTAGTC	AATAA	AAAAA	82	ATGCAACGT	GTCGACCTT	AGTCCCTTC	ACGTTGTCT
sp-34123	AGTGGACTAAGCCACTATAAATAGGCTTTAGGCTTAGAGCGGCAGGGTTCTTCCCTGCGTAGTC	AATAA	AAAAA	74	ATCGCGTTT	TTCGAATCG	TACTCACCG	TCCCATCCT
sp-34131	AGTGGACTAAGCCACTATAAATAGACATTAGGCTTAGAGCGTCCCGGCAGCTGCCGGGGGTTGTA	AATAA	TAACT	75	ATCGAGTCT	CTGTACCCA	CACACCCAT	TTACGGGAC
sp-34132	AGTGGACTAAGCCACTATAAATAGACATTAGGCTTAGAGCGTCTTGGTCGGTATTACCGGCTGGGGGTTGTA	AATAA	TAACT	82	AACTTCCCC	CATAAACGG	CATCAGGCA	AAGTCTGTG
sp-34133	AGTGGACTAAGCCACTATAAATAGACATTAGGCTTAGAGCGGCAGGGTTCTTCCCTGCGTTGTA	AATAA	TAACT	74	CAGCCCAAT	GCGAAACTT	CGATCAACT	AGCTAGTCC
sp-34141	AGTGGACTAAGCCACTATAAATAGGTGTTAGGCTTAGAGCGTCCCGGCAGCTGCCGGGGGTCACA	AATAA	TTAAT	75	AGAGCCAGT	CCCGAAACA	ACTACGCTA	AGTTACACG
sp-34142	AGTGGACTAAGCCACTATAAATAGGTGTTAGGCTTAGAGCGTCTTGGTCGGTATTACCGGCTGGGGGTCACA	AATAA	TTAAT	82	CCTGTGACA	CCATCGTTC	CTAAATCGG	ACGCATCAT
sp-34143	AGTGGACTAAGCCACTATAAATAGGTGTTAGGCTTAGAGCGGCAGGGTTCTTCCCTGCGTCACA	AATAA	TTAAT	74	TGAAGCTCG	GCCATGATG	AGACCATCA	TGGTCGAAT
sp-34151	AGTGGACTAAGCCACTATAAATAGTTATTAGGCTTAGAGCGTCCCGGCAGCTGCCGGGGGTTAAC	AATAA	TAATA	75	CATGTACTC	CACTAGACC	CGGTGTTAT	ATCAAGGCG
sp-34152	AGTGGACTAAGCCACTATAAATAGTTATTAGGCTTAGAGCGTCTTGGTCGGTATTACCGGCTGGGGGTTAAC	AATAA	TAATA	82	ATGCAGACA	TGGTCTGAC	CCTAGCACA	ACTCGAGTG
sp-34153	AGTGGACTAAGCCACTATAAATAGTTATTAGGCTTAGAGCGGCAGGGTTCTTCCCTGCGTTAAC	AATAA	TAATA	74	GCTCAGAAT	CTGTTGATC	GTTCTCTCA	TGTCGACTG
sp-34211	AGTGGACTAAGCCACTATAAATAGGTAATTAGGCTTAGAGCGTCCCGGCAGCTGCCGGGGGTTTAG	AATAA	CAGTT	76	TACGGAAGA	TCGATAAGG	CTATTCCCC	CTGGCAGTT
sp-34212	AGTGGACTAAGCCACTATAAATAGGTAATTAGGCTTAGAGCGTCTTGGTCGGTATTACCGGCTGGGGGTTTAG	AATAA	CAGTT	83	AATTCGCGA	AAGACGAAC	TATGGTGCG	CTATGCACC
sp-34213	AGTGGACTAAGCCACTATAAATAGGTAATTAGGCTTAGAGCGGCAGGGTTCTTCCCTGCGTTTAG	AATAA	CAGTT	75	AGATCGGTG	CCTACTAGT	GCTTGCTGT	AGACTGGTT
sp-34221	AGTGGACTAAGCCACTATAAATAGGGCTTTAGGCTTAGAGCGTCCCGGCAGCTGCCGGGGGTAGTC	AATAA	AAAAA	76	GCTGTCAGA	TGACCATCT	CTCTGAAGA	CCGAGATTA
sp-34222	AGTGGACTAAGCCACTATAAATAGGGCTTTAGGCTTAGAGCGTCTTGGTCGGTATTACCGGCTGGGGGTAGTC	AATAA	AAAAA	83	GTAGCGTAT	GTAACCCCT	CCCATACAG	ACGTAGGTG
sp-34223	AGTGGACTAAGCCACTATAAATAGGGCTTTAGGCTTAGAGCGGCAGGGTTCTTCCCTGCGTAGTC	AATAA	AAAAA	75	TACGGGTCA	GAGTTCGTA	GTACCAGCA	GCTGCCTAA
sp-34231	AGTGGACTAAGCCACTATAAATAGGACATTAGGCTTAGAGCGTCCCGGCAGCTGCCGGGGGTTGTA	AATAA	TAACT	76	GTAGGATAC	AGGTTCGTC	GAGTGTAGA	AAAACCCCT
sp-34232	AGTGGACTAAGCCACTATAAATAGGACATTAGGCTTAGAGCGTCTTGGTCGGTATTACCGGCTGGGGGTTGTA	AATAA	TAACT	83	ACCTGCTTG	TGATGCCTG	CTAGAAGCC	GATTAGCAG
sp-34233	AGTGGACTAAGCCACTATAAATAGGACATTAGGCTTAGAGCGGCAGGGTTCTTCCCTGCGTTGTA	AATAA	TAACT	75	AGGGTGAGT	GATGCTTGA	CTAAGCTTG	AGCTGAAGC
sp-34241	AGTGGACTAAGCCACTATAAATAGGGTGTTAGGCTTAGAGCGTCCCGGCAGCTGCCGGGGGTCACA	AATAA	TTAAT	76	GCCGTTAGT	GTGCACTAG	CCCACTTCT	AGTGTTCGC
sp-34242	AGTGGACTAAGCCACTATAAATAGGGTGTTAGGCTTAGAGCGTCTTGGTCGGTATTACCGGCTGGGGGTCACA	AATAA	TTAAT	83	TAGTCTCCC	AACTGGATC	TTGGACCAC	TCCAGTTAC
sp-34243	AGTGGACTAAGCCACTATAAATAGGGTGTTAGGCTTAGAGCGGCAGGGTTCTTCCCTGCGTCACA	AATAA	TTAAT	75	ATGGTGAAC	GGTTCAGTA	GGGTTGTTC	GTGCAGAAT
sp-34251	AGTGGACTAAGCCACTATAAATAGGTTATTAGGCTTAGAGCGTCCCGGCAGCTGCCGGGGGTTAAC	AATAA	TAATA	76	CCGCCAATA	AGTGTGACG	ATGGGCTTG	AGCTTCCCT
sp-34252	AGTGGACTAAGCCACTATAAATAGGTTATTAGGCTTAGAGCGTCTTGGTCGGTATTACCGGCTGGGGGTTAAC	AATAA	TAATA	83	CTTGAAGAG	GGTGACAAT	CGTACCAAC	CAAGAGGGA
sp-34253	AGTGGACTAAGCCACTATAAATAGGTTATTAGGCTTAGAGCGGCAGGGTTCTTCCCTGCGTTAAC	AATAA	TAATA	75	TGTAGCTTC	ATAACGGGA	AACACGCCT	CTGCATTAC
sp-34311	AGTGGACTAAGCCACTGTAAATAGTAATTAGGCTTAGAGCGTCCCGGCAGCTGCCGGGGGTTTAG	AATAA	CAGTT	75	CTGAAGGAG	GCGAACAAT	AGGGTAGAC	AGTAAGCCA
sp-34312	AGTGGACTAAGCCACTGTAAATAGTAATTAGGCTTAGAGCGTCTTGGTCGGTATTACCGGCTGGGGGTTTAG	AATAA	CAGTT	82	ACCAACTGA	CGCAATGTG	ATCGCGAGA	ATACGGTGT
sp-34313	AGTGGACTAAGCCACTGTAAATAGTAATTAGGCTTAGAGCGGCAGGGTTCTTCCCTGCGTTTAG	AATAA	CAGTT	74	TCTGACTCC	TGCATGGCA	AATCGTAGG	CGTCTTGCT
sp-34321	AGTGGACTAAGCCACTGTAAATAGGCTTTAGGCTTAGAGCGTCCCGGCAGCTGCCGGGGGTAGTC	AATAA	AAAAA	75	CCAAGTACT	AGATCGAGG	CAGCGTACT	TGACTATGG
sp-34322	AGTGGACTAAGCCACTGTAAATAGGCTTTAGGCTTAGAGCGTCTTGGTCGGTATTACCGGCTGGGGGTAGTC	AATAA	AAAAA	82	TCTTATCGG	GGTCCATTT	GTTAACGTC	TCGGTACAT
sp-34323	AGTGGACTAAGCCACTGTAAATAGGCTTTAGGCTTAGAGCGGCAGGGTTCTTCCCTGCGTAGTC	AATAA	AAAAA	74	CAACCTGAT	GAGATAGTG	GGGTATGAA	GGTTAGATC
sp-34331	AGTGGACTAAGCCACTGTAAATAGACATTAGGCTTAGAGCGTCCCGGCAGCTGCCGGGGGTTGTA	AATAA	TAACT	75	ACAGGGAAG	CGTACTTTC	GTGAGCCTT	ACACTGGTA
sp-34332	AGTGGACTAAGCCACTGTAAATAGACATTAGGCTTAGAGCGTCTTGGTCGGTATTACCGGCTGGGGGTTGTA	AATAA	TAACT	82	CATGAGGCT	TGGTATGGT	GGACAGACT	TATAACCGC
sp-34333	AGTGGACTAAGCCACTGTAAATAGACATTAGGCTTAGAGCGGCAGGGTTCTTCCCTGCGTTGTA	AATAA	TAACT	74	GTACGGATC	GTTGACGCT	GTAGGTAGC	CCCAGTAAT
sp-34341	AGTGGACTAAGCCACTGTAAATAGGTGTTAGGCTTAGAGCGTCCCGGCAGCTGCCGGGGGTCACA	AATAA	TTAAT	75	ATTGGTCGG	GACCTGAAT	TCTCGTGCT	TGTGACCAA
sp-34342	AGTGGACTAAGCCACTGTAAATAGGTGTTAGGCTTAGAGCGTCTTGGTCGGTATTACCGGCTGGGGGTCACA	AATAA	TTAAT	82	GCATCAAGA	ATTCAGTCG	CAAGACTAG	GTACGCAAA
sp-34343	AGTGGACTAAGCCACTGTAAATAGGTGTTAGGCTTAGAGCGGCAGGGTTCTTCCCTGCGTCACA	AATAA	TTAAT	74	AGCAAACCT	CGCAGCTAT	TTTGAACCG	TAGGATCCA
sp-34351	AGTGGACTAAGCCACTGTAAATAGTTATTAGGCTTAGAGCGTCCCGGCAGCTGCCGGGGGTTAAC	AATAA	TAATA	75	AGCTCACAA	ACAATGTCG	AACGTGAGG	ATTCTGCGG
sp-34352	AGTGGACTAAGCCACTGTAAATAGTTATTAGGCTTAGAGCGTCTTGGTCGGTATTACCGGCTGGGGGTTAAC	AATAA	TAATA	82	ACTCGAAAC	CGGCTACAA	TTGAGGGCT	TGAGAATCC
sp-34353	AGTGGACTAAGCCACTGTAAATAGTTATTAGGCTTAGAGCGGCAGGGTTCTTCCCTGCGTTAAC	AATAA	TAATA	74	TCGGCTTTG	TTCCGGAAC	GGGACTAAC	CTGCTTGAT
sp-34411	AGTGGACTAAGCCACTTTAAATAGTAATTAGGCTTAGAGCGTCCCGGCAGCTGCCGGGGGTTTAG	AATAA	CAGTT	75	ATGCGAAGC	ACCGGTTCT	CAGAGATGG	GCATCTCTT
sp-34412	AGTGGACTAAGCCACTTTAAATAGTAATTAGGCTTAGAGCGTCTTGGTCGGTATTACCGGCTGGGGGTTTAG	AATAA	CAGTT	82	AGCAACACG	CAGGTCGTA	GTGTATCAG	TACAGGCAT
sp-34413	AGTGGACTAAGCCACTTTAAATAGTAATTAGGCTTAGAGCGGCAGGGTTCTTCCCTGCGTTTAG	AATAA	CAGTT	74	TGTGCCGTT	CTGAGAGGT	GATTGGGCT	GATACTTCG
sp-34421	AGTGGACTAAGCCACTTTAAATAGGCTTTAGGCTTAGAGCGTCCCGGCAGCTGCCGGGGGTAGTC	AATAA	AAAAA	75	GAAGGACAA	TCGTAAGAG	ATCTCCTCT	CTCGGTAAA
sp-34422	AGTGGACTAAGCCACTTTAAATAGGCTTTAGGCTTAGAGCGTCTTGGTCGGTATTACCGGCTGGGGGTAGTC	AATAA	AAAAA	82	GTCTACTCA	GCATAAGCA	CATATTCCG	CTATCTGGC
sp-34423	AGTGGACTAAGCCACTTTAAATAGGCTTTAGGCTTAGAGCGGCAGGGTTCTTCCCTGCGTAGTC	AATAA	AAAAA	74	ACCTTCCTC	TTCGTGACC	GTGGGAATA	CAAGCTCTA
sp-34431	AGTGGACTAAGCCACTTTAAATAGACATTAGGCTTAGAGCGTCCCGGCAGCTGCCGGGGGTTGTA	AATAA	TAACT	75	ATACGGCGA	TAGTACGGA	TAGCCACTA	TGACCGTTT
sp-34432	AGTGGACTAAGCCACTTTAAATAGACATTAGGCTTAGAGCGTCTTGGTCGGTATTACCGGCTGGGGGTTGTA	AATAA	TAACT	82	GTAACTAGG	AGCTTGAAC	CGGAGATGT	ACGGAAGCT
sp-34433	AGTGGACTAAGCCACTTTAAATAGACATTAGGCTTAGAGCGGCAGGGTTCTTCCCTGCGTTGTA	AATAA	TAACT	74	TCAGATAGG	CGGTAAGTC	CCCTAGAAG	TATTCCGGC
sp-34441	AGTGGACTAAGCCACTTTAAATAGGTGTTAGGCTTAGAGCGTCCCGGCAGCTGCCGGGGGTCACA	AATAA	TTAAT	75	TTCGGCAGT	GAGTCCATT	GGTTCCACT	AAGTCACTG
sp-34442	AGTGGACTAAGCCACTTTAAATAGGTGTTAGGCTTAGAGCGTCTTGGTCGGTATTACCGGCTGGGGGTCACA	AATAA	TTAAT	82	TTGTAGTCG	TGCTACACT	TGTACTCAC	GCGTGACTT
sp-34443	AGTGGACTAAGCCACTTTAAATAGGTGTTAGGCTTAGAGCGGCAGGGTTCTTCCCTGCGTCACA	AATAA	TTAAT	74	GACAACGAG	TGCTTTGTC	GTTACGGCT	TCCGTCTTG
sp-34451	AGTGGACTAAGCCACTTTAAATAGTTATTAGGCTTAGAGCGTCCCGGCAGCTGCCGGGGGTTAAC	AATAA	TAATA	75	GTTATCTCC	TCTGTTGCG	GCTATGCTC	GATTGCCAG
sp-34452	AGTGGACTAAGCCACTTTAAATAGTTATTAGGCTTAGAGCGTCTTGGTCGGTATTACCGGCTGGGGGTTAAC	AATAA	TAATA	82	TCGTATTGC	CAGATACGC	TTGTGTCCA	AGTAGCAGC
sp-34453	AGTGGACTAAGCCACTTTAAATAGTTATTAGGCTTAGAGCGGCAGGGTTCTTCCCTGCGTTAAC	AATAA	TAATA	74	TCATGTCGT	GTGACTTCA	TAGGACTAC	AATATGGCC
sp-34511	AGTGGACTAAGCCACTATAAACGTAATTAGGCTTAGAGCGTCCCGGCAGCTGCCGGGGGTTTAG	AATAA	CAGTT	74	ACCGAAACC	TCAAGTTGC	CTACGACCT	CCGACATGT
sp-34512	AGTGGACTAAGCCACTATAAACGTAATTAGGCTTAGAGCGTCTTGGTCGGTATTACCGGCTGGGGGTTTAG	AATAA	CAGTT	81	AGCACTGCT	CACCCTTCA	TATATGCGG	CCTTATTCC
sp-34513	AGTGGACTAAGCCACTATAAACGTAATTAGGCTTAGAGCGGCAGGGTTCTTCCCTGCGTTTAG	AATAA	CAGTT	73	AAGCTAGTC	TATCGCTCT	AACGACCAG	TTGGGCTTC
sp-34521	AGTGGACTAAGCCACTATAAACGGCTTTAGGCTTAGAGCGTCCCGGCAGCTGCCGGGGGTAGTC	AATAA	AAAAA	74	GTATGCTAC	GATTAGCCT	TCTGTGCAT	TGCGACTGA
sp-34522	AGTGGACTAAGCCACTATAAACGGCTTTAGGCTTAGAGCGTCTTGGTCGGTATTACCGGCTGGGGGTAGTC	AATAA	AAAAA	81	CGAAACAGG	AGACAGGTG	AAGCCTACC	GATACACCT
sp-34523	AGTGGACTAAGCCACTATAAACGGCTTTAGGCTTAGAGCGGCAGGGTTCTTCCCTGCGTAGTC	AATAA	AAAAA	73	CCTCTGTAG	GAGTGCTAA	ATCCGTACA	TACTGCCAG
sp-34531	AGTGGACTAAGCCACTATAAACGACATTAGGCTTAGAGCGTCCCGGCAGCTGCCGGGGGTTGTA	AATAA	TAACT	74	GGTCGTATA	ACACTACTG	ACGTGCTTA	CGATGTTAC
sp-34532	AGTGGACTAAGCCACTATAAACGACATTAGGCTTAGAGCGTCTTGGTCGGTATTACCGGCTGGGGGTTGTA	AATAA	TAACT	81	AGACTCCTT	GCAACAACA	CACGGTATA	GTTTCCACA
sp-34533	AGTGGACTAAGCCACTATAAACGACATTAGGCTTAGAGCGGCAGGGTTCTTCCCTGCGTTGTA	AATAA	TAACT	73	ATAATGCGG	CAACTGCGT	ACAGATCAG	AGTGGATAG
sp-34541	AGTGGACTAAGCCACTATAAACGGTGTTAGGCTTAGAGCGTCCCGGCAGCTGCCGGGGGTCACA	AATAA	TTAAT	74	AAACATGCC	CCATCACCA	GATGTCAAC	CTCCAATTC
sp-34542	AGTGGACTAAGCCACTATAAACGGTGTTAGGCTTAGAGCGTCTTGGTCGGTATTACCGGCTGGGGGTCACA	AATAA	TTAAT	81	TTGGTCTCT	TCGTGCATT	CCCGTATTT	TGGTACCTG
sp-34543	AGTGGACTAAGCCACTATAAACGGTGTTAGGCTTAGAGCGGCAGGGTTCTTCCCTGCGTCACA	AATAA	TTAAT	73	ACCCCTGTA	ACGTGAGTG	GCTGAATAC	CATGGGTAA
sp-34551	AGTGGACTAAGCCACTATAAACGTTATTAGGCTTAGAGCGTCCCGGCAGCTGCCGGGGGTTAAC	AATAA	TAATA	74	GACCTTATG	ATGAGTCCA	ATGTGTCAC	ATGCTGGGA
sp-34552	AGTGGACTAAGCCACTATAAACGTTATTAGGCTTAGAGCGTCTTGGTCGGTATTACCGGCTGGGGGTTAAC	AATAA	TAATA	81	GACTATGGA	GTAAGGGAT	AGGCAAGTG	CTTGGATGC
sp-34553	AGTGGACTAAGCCACTATAAACGTTATTAGGCTTAGAGCGGCAGGGTTCTTCCCTGCGTTAAC	AATAA	TAATA	73	TGCAGATAG	CTGAGCTCA	ATCGTCTTG	AAAACCGCC
sp-35111	AGTGGACTATGCCACTATAAATAGTAATTAGGCATAGTGCGTCCCGGCAGCTGCCGGGGGTTTAG	AATAA	CAGTT	75	GGTACCTAA	TATGCTCGC	GCAAGGAAG	AAGACGCAA
sp-35112	AGTGGACTATGCCACTATAAATAGTAATTAGGCATAGTGCGTCTTGGTCGGTATTACCGGCTGGGGGTTTAG	AATAA	CAGTT	82	TCATGCTTG	AGTATAGCC	TGATAACCG	ACCGTTAGC
sp-35113	AGTGGACTATGCCACTATAAATAGTAATTAGGCATAGTGCGGCAGGGTTCTTCCCTGCGTTTAG	AATAA	CAGTT	74	CAGTGAGGT	GCATGTATC	TTCGTGAGG	CTCTGGTCA
sp-35121	AGTGGACTATGCCACTATAAATAGGCTTTAGGCATAGTGCGTCCCGGCAGCTGCCGGGGGTAGTC	AATAA	AAAAA	75	TACCTATGC	TCCTACGAC	TGCTAAGGC	CGGTAACTG
sp-35122	AGTGGACTATGCCACTATAAATAGGCTTTAGGCATAGTGCGTCTTGGTCGGTATTACCGGCTGGGGGTAGTC	AATAA	AAAAA	82	CGTATTCCC	GTACAATCC	AGGCTGTCT	TCGTTCCTC
sp-35123	AGTGGACTATGCCACTATAAATAGGCTTTAGGCATAGTGCGGCAGGGTTCTTCCCTGCGTAGTC	AATAA	AAAAA	74	AAGGCCGAT	GCGAAAGCA	CTAGCCACT	GGAAGGGTA
sp-35131	AGTGGACTATGCCACTATAAATAGACATTAGGCATAGTGCGTCCCGGCAGCTGCCGGGGGTTGTA	AATAA	TAACT	75	GACACAGTA	ACTTGTCGC	CATGCCTCA	GCAAACTGA
sp-35132	AGTGGACTATGCCACTATAAATAGACATTAGGCATAGTGCGTCTTGGTCGGTATTACCGGCTGGGGGTTGTA	AATAA	TAACT	82	GAGTAGTCG	AACCCCATA	CCGCTAAAC	CACCTGACT
sp-35133	AGTGGACTATGCCACTATAAATAGACATTAGGCATAGTGCGGCAGGGTTCTTCCCTGCGTTGTA	AATAA	TAACT	74	ATCAGGCTG	TGGCATCAA	AGATAACCC	TCCCAGGTT
sp-35141	AGTGGACTATGCCACTATAAATAGGTGTTAGGCATAGTGCGTCCCGGCAGCTGCCGGGGGTCACA	AATAA	TTAAT	75	CTCAAGGGA	GTGTTGTTG	TGTTGGTCC	TTTGAGGCT
sp-35142	AGTGGACTATGCCACTATAAATAGGTGTTAGGCATAGTGCGTCTTGGTCGGTATTACCGGCTGGGGGTCACA	AATAA	TTAAT	82	ACATATCCC	CATTCCAGG	CTCCAACGT	GGTATGACC
sp-35143	AGTGGACTATGCCACTATAAATAGGTGTTAGGCATAGTGCGGCAGGGTTCTTCCCTGCGTCACA	AATAA	TTAAT	74	GCATGTCTG	ACAAATGGG	GTGAGAACA	ATGGGACTC
sp-35151	AGTGGACTATGCCACTATAAATAGTTATTAGGCATAGTGCGTCCCGGCAGCTGCCGGGGGTTAAC	AATAA	TAATA	75	TTGCCTTTC	AAGGGGCAA	AGGCGATAG	GGAGTGAAG
sp-35152	AGTGGACTATGCCACTATAAATAGTTATTAGGCATAGTGCGTCTTGGTCGGTATTACCGGCTGGGGGTTAAC	AATAA	TAATA	82	GAGTCTAAC	TTCCGACTA	TTAGTGCTC	AGGACCAAG
sp-35153	AGTGGACTATGCCACTATAAATAGTTATTAGGCATAGTGCGGCAGGGTTCTTCCCTGCGTTAAC	AATAA	TAATA	74	GGGCAACAA	GCTCTGTCT	TCACGTGGA	TAGACGTTG
sp-35211	AGTGGACTATGCCACTATAAATAGGTAATTAGGCATAGTGCGTCCCGGCAGCTGCCGGGGGTTTAG	AATAA	CAGTT	76	GTGACGTTT	GTTTTGACC	CGTAACATC	AACCCGTTA
sp-35212	AGTGGACTATGCCACTATAAATAGGTAATTAGGCATAGTGCGTCTTGGTCGGTATTACCGGCTGGGGGTTTAG	AATAA	CAGTT	83	CCTTTGGGA	CCTGTAAGT	ATTGGCGCT	GTCAGAAGC
sp-35213	AGTGGACTATGCCACTATAAATAGGTAATTAGGCATAGTGCGGCAGGGTTCTTCCCTGCGTTTAG	AATAA	CAGTT	75	TTGCCACGA	ACTCTCAGA	CGCACTGTA	AACTCCGTT
sp-35221	AGTGGACTATGCCACTATAAATAGGGCTTTAGGCATAGTGCGTCCCGGCAGCTGCCGGGGGTAGTC	AATAA	AAAAA	76	TACTAAGGG	CAGCATGGA	CATACCGAG	GAGCGATTC
sp-35222	AGTGGACTATGCCACTATAAATAGGGCTTTAGGCATAGTGCGTCTTGGTCGGTATTACCGGCTGGGGGTAGTC	AATAA	AAAAA	83	TCCCAAAGA	GCATGTCCT	GAAGATCGC	AGTCTCCGT
sp-35223	AGTGGACTATGCCACTATAAATAGGGCTTTAGGCATAGTGCGGCAGGGTTCTTCCCTGCGTAGTC	AATAA	AAAAA	75	CGGTCATTA	GCATTCACA	GTGAGCATC	AGGCAGTTT
sp-35231	AGTGGACTATGCCACTATAAATAGGACATTAGGCATAGTGCGTCCCGGCAGCTGCCGGGGGTTGTA	AATAA	TAACT	76	TACCGCAAT	GATGAGCCA	TGGTTCTGG	GAAGGGGTA
sp-35232	AGTGGACTATGCCACTATAAATAGGACATTAGGCATAGTGCGTCTTGGTCGGTATTACCGGCTGGGGGTTGTA	AATAA	TAACT	83	GCAGTAAAC	CTTAGCCGA	CACAGTGTT	ATATGCGCG
sp-35233	AGTGGACTATGCCACTATAAATAGGACATTAGGCATAGTGCGGCAGGGTTCTTCCCTGCGTTGTA	AATAA	TAACT	75	CTTCCACTT	CAGCAGACA	CCAATAGCC	TCCAGGATG
sp-35241	AGTGGACTATGCCACTATAAATAGGGTGTTAGGCATAGTGCGTCCCGGCAGCTGCCGGGGGTCACA	AATAA	TTAAT	76	AGATGCGCT	CTGAGAAAG	TTACTGCGA	ACGCGTACA
sp-35242	AGTGGACTATGCCACTATAAATAGGGTGTTAGGCATAGTGCGTCTTGGTCGGTATTACCGGCTGGGGGTCACA	AATAA	TTAAT	83	TGCTCATGT	CCGAAAAGT	TCGACGTTA	TCCTGTGTG
sp-35243	AGTGGACTATGCCACTATAAATAGGGTGTTAGGCATAGTGCGGCAGGGTTCTTCCCTGCGTCACA	AATAA	TTAAT	75	TAACGCGAA	ACGGCATTC	TCTGTGCGA	ACTCGGACA
sp-35251	AGTGGACTATGCCACTATAAATAGGTTATTAGGCATAGTGCGTCCCGGCAGCTGCCGGGGGTTAAC	AATAA	TAATA	76	AGTTCTTGG	CTGAAGGTA	CGAGATGAA	GTTTCTGCG
sp-35252	AGTGGACTATGCCACTATAAATAGGTTATTAGGCATAGTGCGTCTTGGTCGGTATTACCGGCTGGGGGTTAAC	AATAA	TAATA	83	TCCTCTCGT	AAGCCCAAC	GACATTCAG	GATCATCCC
sp-35253	AGTGGACTATGCCACTATAAATAGGTTATTAGGCATAGTGCGGCAGGGTTCTTCCCTGCGTTAAC	AATAA	TAATA	75	TCCACAGAC	GCGTCATTA	AGGACAATG	TGCGTATCT
sp-35311	AGTGGACTATGCCACTGTAAATAGTAATTAGGCATAGTGCGTCCCGGCAGCTGCCGGGGGTTTAG	AATAA	CAGTT	75	CAAGATAGC	GGTGCAATG	GCGTATTGG	CATAACGTC
sp-35312	AGTGGACTATGCCACTGTAAATAGTAATTAGGCATAGTGCGTCTTGGTCGGTATTACCGGCTGGGGGTTTAG	AATAA	CAGTT	82	GTACCCTTA	CCACTAGTC	AATGAAGGG	CTTCACTGT
sp-35313	AGTGGACTATGCCACTGTAAATAGTAATTAGGCATAGTGCGGCAGGGTTCTTCCCTGCGTTTAG	AATAA	CAGTT	74	TTTTCGTCC	TAGCGTTTC	GAAGACACC	TCGGAGTTG
sp-35321	AGTGGACTATGCCACTGTAAATAGGCTTTAGGCATAGTGCGTCCCGGCAGCTGCCGGGGGTAGTC	AATAA	AAAAA	75	TCCAAAGGT	TGAGCTCTG	GTAGTAGTC	TGCAAAGCA
sp-35322	AGTGGACTATGCCACTGTAAATAGGCTTTAGGCATAGTGCGTCTTGGTCGGTATTACCGGCTGGGGGTAGTC	AATAA	AAAAA	82	ATGACAGGC	AGAGCTGTA	GCCTAAGAA	GTAGAGGCT
sp-35323	AGTGGACTATGCCACTGTAAATAGGCTTTAGGCATAGTGCGGCAGGGTTCTTCCCTGCGTAGTC	AATAA	AAAAA	74	AGAGACACT	ATTCCTCAC	CGACATGAT	GTATTGCGA
sp-35331	AGTGGACTATGCCACTGTAAATAGACATTAGGCATAGTGCGTCCCGGCAGCTGCCGGGGGTTGTA	AATAA	TAACT	75	TCATGCGGT	CAACCTCAA	GGAGCACAA	AACTAGTCG
sp-35332	AGTGGACTATGCCACTGTAAATAGACATTAGGCATAGTGCGTCTTGGTCGGTATTACCGGCTGGGGGTTGTA	AATAA	TAACT	82	ACTCGGTTG	GTGACTGTC	ACGCACTAA	GTTCTTCAC
sp-35333	AGTGGACTATGCCACTGTAAATAGACATTAGGCATAGTGCGGCAGGGTTCTTCCCTGCGTTGTA	AATAA	TAACT	74	GAACTTGGC	AATCCGGGA	GAGTTCCCA	GGGAATCTG
sp-35341	AGTGGACTATGCCACTGTAAATAGGTGTTAGGCATAGTGCGTCCCGGCAGCTGCCGGGGGTCACA	AATAA	TTAAT	75	GTTGTGATC	TACAGCTTC	ATGACAGCT	TAACCCGAC
sp-35342	AGTGGACTATGCCACTGTAAATAGGTGTTAGGCATAGTGCGTCTTGGTCGGTATTACCGGCTGGGGGTCACA	AATAA	TTAAT	82	AAGAGTCCC	CTTAGGAAG	AACCTGTAC	GCATCACTG
sp-35343	AGTGGACTATGCCACTGTAAATAGGTGTTAGGCATAGTGCGGCAGGGTTCTTCCCTGCGTCACA	AATAA	TTAAT	74	CGTTCCCTT	ACACATAGG	CTGTAAGGA	ATCAGGAGG
sp-35351	AGTGGACTATGCCACTGTAAATAGTTATTAGGCATAGTGCGTCCCGGCAGCTGCCGGGGGTTAAC	AATAA	TAATA	75	GGATAGCTT	GGCTTAGTT	AGTTGCTCG	GACAGGTCT
sp-35352	AGTGGACTATGCCACTGTAAATAGTTATTAGGCATAGTGCGTCTTGGTCGGTATTACCGGCTGGGGGTTAAC	AATAA	TAATA	82	TCGTCCTAA	GAGTTAGGG	TAGCGAACA	TGAGACATG
sp-35353	AGTGGACTATGCCACTGTAAATAGTTATTAGGCATAGTGCGGCAGGGTTCTTCCCTGCGTTAAC	AATAA	TAATA	74	ACGGTGTTA	CAGTGCAAG	GGAGTTTTC	GGTCTCTTG
sp-35411	AGTGGACTATGCCACTTTAAATAGTAATTAGGCATAGTGCGTCCCGGCAGCTGCCGGGGGTTTAG	AATAA	CAGTT	75	GGCAACTAC	AATACGGGT	GCCAATACA	CTACTATCC
sp-35412	AGTGGACTATGCCACTTTAAATAGTAATTAGGCATAGTGCGTCTTGGTCGGTATTACCGGCTGGGGGTTTAG	AATAA	CAGTT	82	AAACGCCGT	GAGTAGGTG	AGATATGCG	CGTTAACGG
sp-35413	AGTGGACTATGCCACTTTAAATAGTAATTAGGCATAGTGCGGCAGGGTTCTTCCCTGCGTTTAG	AATAA	CAGTT	74	CACGATCAT	ACCGTCTAA	TTGTTCCCC	TCCAATCAG
sp-35421	AGTGGACTATGCCACTTTAAATAGGCTTTAGGCATAGTGCGTCCCGGCAGCTGCCGGGGGTAGTC	AATAA	AAAAA	75	GTCGAGAAT	TGCTCTTTC	AGTCAGATG	GAGAGCTAT
sp-35422	AGTGGACTATGCCACTTTAAATAGGCTTTAGGCATAGTGCGTCTTGGTCGGTATTACCGGCTGGGGGTAGTC	AATAA	AAAAA	82	TCACACCTT	ATCCTCACT	GCTGGTAAT	CACTAGAGG
sp-35423	AGTGGACTATGCCACTTTAAATAGGCTTTAGGCATAGTGCGGCAGGGTTCTTCCCTGCGTAGTC	AATAA	AAAAA	74	CTGTCACGA	AAGTAGTGG	ACGACACCT	AAGTCACGT
sp-35431	AGTGGACTATGCCACTTTAAATAGACATTAGGCATAGTGCGTCCCGGCAGCTGCCGGGGGTTGTA	AATAA	TAACT	75	TGAATCACC	GACGATAGA	GTCGCACTT	CTCTCGAAA
sp-35432	AGTGGACTATGCCACTTTAAATAGACATTAGGCATAGTGCGTCTTGGTCGGTATTACCGGCTGGGGGTTGTA	AATAA	TAACT	82	CTGTGTTCA	TTTTGACCG	TTTAGGGTC	GTTTTGGAG
sp-35433	AGTGGACTATGCCACTTTAAATAGACATTAGGCATAGTGCGGCAGGGTTCTTCCCTGCGTTGTA	AATAA	TAACT	74	GTCTTCGTG	TTGACTCCA	TGTAGTCGC	TTCGAACCA
sp-35441	AGTGGACTATGCCACTTTAAATAGGTGTTAGGCATAGTGCGTCCCGGCAGCTGCCGGGGGTCACA	AATAA	TTAAT	75	GTATTCCCG	GCAACTCAG	TTCAATCCG	CGAGAGAGA
sp-35442	AGTGGACTATGCCACTTTAAATAGGTGTTAGGCATAGTGCGTCTTGGTCGGTATTACCGGCTGGGGGTCACA	AATAA	TTAAT	82	TGTTCCAGC	TAGGCGAAC	ATCGTCCCT	TGTCGAAGC
sp-35443	AGTGGACTATGCCACTTTAAATAGGTGTTAGGCATAGTGCGGCAGGGTTCTTCCCTGCGTCACA	AATAA	TTAAT	74	AAGGGAATC	TTCTATGGC	CTTTGTCGA	GTGCATGTC
sp-35451	AGTGGACTATGCCACTTTAAATAGTTATTAGGCATAGTGCGTCCCGGCAGCTGCCGGGGGTTAAC	AATAA	TAATA	75	CTCATGTCT	CCGAGTATC	CGTCATTTG	TAGGTGGAA
sp-35452	AGTGGACTATGCCACTTTAAATAGTTATTAGGCATAGTGCGTCTTGGTCGGTATTACCGGCTGGGGGTTAAC	AATAA	TAATA	82	CAGACAACC	GATACATGC	AATACGGCG	AACTGCTAG
sp-35453	AGTGGACTATGCCACTTTAAATAGTTATTAGGCATAGTGCGGCAGGGTTCTTCCCTGCGTTAAC	AATAA	TAATA	74	AAGGACTGG	TTCCCCATG	GAGGAGTTG	GTCTAACGC
sp-35511	AGTGGACTATGCCACTATAAACGTAATTAGGCATAGTGCGTCCCGGCAGCTGCCGGGGGTTTAG	AATAA	CAGTT	74	AGCGTCTCA	AGAGGAAGA	CGCGACATA	TTGAGCTAG
sp-35512	AGTGGACTATGCCACTATAAACGTAATTAGGCATAGTGCGTCTTGGTCGGTATTACCGGCTGGGGGTTTAG	AATAA	CAGTT	81	TTGACTGAG	GAGCTTACG	AATCTTCCC	GGCATAAGC
sp-35513	AGTGGACTATGCCACTATAAACGTAATTAGGCATAGTGCGGCAGGGTTCTTCCCTGCGTTTAG	AATAA	CAGTT	73	TTAGTTCGC	TCTCGACTT	TTCAGCCGA	CCACAACTT
sp-35521	AGTGGACTATGCCACTATAAACGGCTTTAGGCATAGTGCGTCCCGGCAGCTGCCGGGGGTAGTC	AATAA	AAAAA	74	CATGGAACG	GGAGAATAG	CAGAACAAC	GTCGTCCAT
sp-35522	AGTGGACTATGCCACTATAAACGGCTTTAGGCATAGTGCGTCTTGGTCGGTATTACCGGCTGGGGGTAGTC	AATAA	AAAAA	81	TCCATCTCA	GCATATCTC	CGATCATGT	TGGGCTCTA
sp-35523	AGTGGACTATGCCACTATAAACGGCTTTAGGCATAGTGCGGCAGGGTTCTTCCCTGCGTAGTC	AATAA	AAAAA	73	TAGAACAGG	GACTCTTGT	CACTTGCTG	AGCTCTTAC
sp-35531	AGTGGACTATGCCACTATAAACGACATTAGGCATAGTGCGTCCCGGCAGCTGCCGGGGGTTGTA	AATAA	TAACT	74	TACCTACCG	GCCCATAGA	ATTGGCCTT	TACCTCGAC
sp-35532	AGTGGACTATGCCACTATAAACGACATTAGGCATAGTGCGTCTTGGTCGGTATTACCGGCTGGGGGTTGTA	AATAA	TAACT	81	TTTGACCTC	GAGTGAATG	AGTGGTAAG	GTATGGGAC
sp-35533	AGTGGACTATGCCACTATAAACGACATTAGGCATAGTGCGGCAGGGTTCTTCCCTGCGTTGTA	AATAA	TAACT	73	AGACTGATG	GTCATACGA	ATTCCTTCG	CCGTAAGAA
sp-35541	AGTGGACTATGCCACTATAAACGGTGTTAGGCATAGTGCGTCCCGGCAGCTGCCGGGGGTCACA	AATAA	TTAAT	74	CTGGTAGAG	CGAGTACTA	ATGGTCATC	TGCACACTT
sp-35542	AGTGGACTATGCCACTATAAACGGTGTTAGGCATAGTGCGTCTTGGTCGGTATTACCGGCTGGGGGTCACA	AATAA	TTAAT	81	CGGTTCAAG	CCACAACGA	CATTCGCCA	TGCGCTTAA
sp-35543	AGTGGACTATGCCACTATAAACGGTGTTAGGCATAGTGCGGCAGGGTTCTTCCCTGCGTCACA	AATAA	TTAAT	73	GGTTTCCGA	ATTGAGACC	CTACTGGTG	GCAGTGGAA
sp-35551	AGTGGACTATGCCACTATAAACGTTATTAGGCATAGTGCGTCCCGGCAGCTGCCGGGGGTTAAC	AATAA	TAATA	74	AACTGCGTG	ATCCCCTAG	GTCATCTTG	CTTGCAAGA
sp-35552	AGTGGACTATGCCACTATAAACGTTATTAGGCATAGTGCGTCTTGGTCGGTATTACCGGCTGGGGGTTAAC	AATAA	TAATA	81	TCAGCTCCT	TCCTTAAGC	CAGATCACG	ATTCCGTGT
sp-35553	AGTGGACTATGCCACTATAAACGTTATTAGGCATAGTGCGGCAGGGTTCTTCCCTGCGTTAAC	AATAA	TAATA	73	CCGCTCTTA	CGAGAACTT	TCGTCTGAG	TGCTACTCA
sp-36111	AGTGGTTAGGGCCACTATAAATAGTAATTAAGCCCTAAGCGTCCCGGCAGCTGCCGGGGGTTTAG	AATAA	CAGTT	75	TCAGTGGTC	CAGGACATT	ACTGTGCTG	GTATCGGTC
sp-36112	AGTGGTTAGGGCCACTATAAATAGTAATTAAGCCCTAAGCGTCTTGGTCGGTATTACCGGCTGGGGGTTTAG	AATAA	CAGTT	82	GGGTCTCAT	AACGAGGAT	TACGCAAGT	TCTCACCCT
sp-36113	AGTGGTTAGGGCCACTATAAATAGTAATTAAGCCCTAAGCGGCAGGGTTCTTCCCTGCGTTTAG	AATAA	CAGTT	74	TGTTGCAAG	GTCAATGCA	CCGGCTAAT	AGCGGGTTA
sp-36121	AGTGGTTAGGGCCACTATAAATAGGCTTTAAGCCCTAAGCGTCCCGGCAGCTGCCGGGGGTAGTC	AATAA	AAAAA	75	ACAGGTCGA	TCCTGACTG	TTGTTGGCG	GAGATGCAG
sp-36122	AGTGGTTAGGGCCACTATAAATAGGCTTTAAGCCCTAAGCGTCTTGGTCGGTATTACCGGCTGGGGGTAGTC	AATAA	AAAAA	82	CATGAACCA	TGTATTCGG	CTCCCCAAT	CGGCTATAG
sp-36123	AGTGGTTAGGGCCACTATAAATAGGCTTTAAGCCCTAAGCGGCAGGGTTCTTCCCTGCGTAGTC	AATAA	AAAAA	74	GTTGTGACA	ACCCGTATG	GACCTTAGT	GAATCCGTC
sp-36131	AGTGGTTAGGGCCACTATAAATAGACATTAAGCCCTAAGCGTCCCGGCAGCTGCCGGGGGTTGTA	AATAA	TAACT	75	AGAAACCCG	AGCAGGCAT	GACCGTCTA	CAGGTTGAT
sp-36132	AGTGGTTAGGGCCACTATAAATAGACATTAAGCCCTAAGCGTCTTGGTCGGTATTACCGGCTGGGGGTTGTA	AATAA	TAACT	82	GTAAGACCA	CTCTCTCCA	TTCCGACGT	TGCTCTAGA
sp-36133	AGTGGTTAGGGCCACTATAAATAGACATTAAGCCCTAAGCGGCAGGGTTCTTCCCTGCGTTGTA	AATAA	TAACT	74	GTTATCGAC	AAGAGAGGC	GTTGGTTGG	TTGAACGTG
sp-36141	AGTGGTTAGGGCCACTATAAATAGGTGTTAAGCCCTAAGCGTCCCGGCAGCTGCCGGGGGTCACA	AATAA	TTAAT	75	AGTGGGATG	CCTTTTCGG	CACATCAGA	AGTCGAAGG
sp-36142	AGTGGTTAGGGCCACTATAAATAGGTGTTAAGCCCTAAGCGTCTTGGTCGGTATTACCGGCTGGGGGTCACA	AATAA	TTAAT	82	ATCCCCGTA	ACTTGCACC	GCTTCCTAC	TCGATGATC
sp-36143	AGTGGTTAGGGCCACTATAAATAGGTGTTAAGCCCTAAGCGGCAGGGTTCTTCCCTGCGTCACA	AATAA	TTAAT	74	GCAACACGA	TTGTAACGC	GTCCAATGC	GCGGATATT
sp-36151	AGTGGTTAGGGCCACTATAAATAGTTATTAAGCCCTAAGCGTCCCGGCAGCTGCCGGGGGTTAAC	AATAA	TAATA	75	AGCCGATAA	TATAGGGCA	GGGGCAAAA	GTAACTGAG
sp-36152	AGTGGTTAGGGCCACTATAAATAGTTATTAAGCCCTAAGCGTCTTGGTCGGTATTACCGGCTGGGGGTTAAC	AATAA	TAATA	82	GCTCGTACA	GGTCTAATG	AGGCTTCTT	AGGACAAAC
sp-36153	AGTGGTTAGGGCCACTATAAATAGTTATTAAGCCCTAAGCGGCAGGGTTCTTCCCTGCGTTAAC	AATAA	TAATA	74	GGTCTGAAG	GCCCGATTT	GCCCTTTGA	CCTTCGTGA
sp-36211	AGTGGTTAGGGCCACTATAAATAGGTAATTAAGCCCTAAGCGTCCCGGCAGCTGCCGGGGGTTTAG	AATAA	CAGTT	76	CTGGTACCT	AGCAACTCA	GCTACACAA	CAGACTGAT
sp-36212	AGTGGTTAGGGCCACTATAAATAGGTAATTAAGCCCTAAGCGTCTTGGTCGGTATTACCGGCTGGGGGTTTAG	AATAA	CAGTT	83	ATAACGCTC	TTGCTGATG	TCCCTGGAT	AACGGGAGA
sp-36213	AGTGGTTAGGGCCACTATAAATAGGTAATTAAGCCCTAAGCGGCAGGGTTCTTCCCTGCGTTTAG	AATAA	CAGTT	75	TAGTCCGAA	TGCTAGGTA	ACATGACCT	GCTCATTCC
sp-36221	AGTGGTTAGGGCCACTATAAATAGGGCTTTAAGCCCTAAGCGTCCCGGCAGCTGCCGGGGGTAGTC	AATAA	AAAAA	76	TGGATGACG	GGCATACTC	GTGTAAGTC	TTGACACTG
sp-36222	AGTGGTTAGGGCCACTATAAATAGGGCTTTAAGCCCTAAGCGTCTTGGTCGGTATTACCGGCTGGGGGTAGTC	AATAA	AAAAA	83	CTTTGCCTG	TGTGTAAGG	GGTACACTT	TATGTCTCG
sp-36223	AGTGGTTAGGGCCACTATAAATAGGGCTTTAAGCCCTAAGCGGCAGGGTTCTTCCCTGCGTAGTC	AATAA	AAAAA	75	CGGGTTTGA	AGTTGCGTC	CCAATCTCC	GGGATATCG
sp-36231	AGTGGTTAGGGCCACTATAAATAGGACATTAAGCCCTAAGCGTCCCGGCAGCTGCCGGGGGTTGTA	AATAA	TAACT	76	GTCTCTGAG	AGGTGTTCT	TCGATCTAC	CACGTCGAA
sp-36232	AGTGGTTAGGGCCACTATAAATAGGACATTAAGCCCTAAGCGTCTTGGTCGGTATTACCGGCTGGGGGTTGTA	AATAA	TAACT	83	TGGAAGTGT	TTTGGACAG	GAGTCCAAG	TGATCTCAC
sp-36233	AGTGGTTAGGGCCACTATAAATAGGACATTAAGCCCTAAGCGGCAGGGTTCTTCCCTGCGTTGTA	AATAA	TAACT	75	ATACGGGCA	TTCAGGACC	CTACCGATA	TCATGCTCA
sp-36241	AGTGGTTAGGGCCACTATAAATAGGGTGTTAAGCCCTAAGCGTCCCGGCAGCTGCCGGGGGTCACA	AATAA	TTAAT	76	GCTTACACA	TTCGGGAAA	GAGGAGTCA	GAAGAGCTA
sp-36242	AGTGGTTAGGGCCACTATAAATAGGGTGTTAAGCCCTAAGCGTCTTGGTCGGTATTACCGGCTGGGGGTCACA	AATAA	TTAAT	83	GAGGGTATC	TCGAATCCG	GGAACACAC	AATACTGGC
sp-36243	AGTGGTTAGGGCCACTATAAATAGGGTGTTAAGCCCTAAGCGGCAGGGTTCTTCCCTGCGTCACA	AATAA	TTAAT	75	AAAGGTGCG	CTCAGAGTA	TCTCTCTCA	TACCCCTTA
sp-36251	AGTGGTTAGGGCCACTATAAATAGGTTATTAAGCCCTAAGCGTCCCGGCAGCTGCCGGGGGTTAAC	AATAA	TAATA	76	GTGTGGATG	AGCTAGGAA	TAAACGCTG	TCGTCCATA
sp-36252	AGTGGTTAGGGCCACTATAAATAGGTTATTAAGCCCTAAGCGTCTTGGTCGGTATTACCGGCTGGGGGTTAAC	AATAA	TAATA	83	TAAGGGATC	CTGGAAGCT	GTGCAGAGA	ATCACGCGT
sp-36253	AGTGGTTAGGGCCACTATAAATAGGTTATTAAGCCCTAAGCGGCAGGGTTCTTCCCTGCGTTAAC	AATAA	TAATA	75	TGCTCTCAG	CACGTTCTA	TATCTTCGC	AGTGACTGC
sp-36311	AGTGGTTAGGGCCACTGTAAATAGTAATTAAGCCCTAAGCGTCCCGGCAGCTGCCGGGGGTTTAG	AATAA	CAGTT	75	AGGTCAGAT	TTAGGGCTG	AGACGCTCA	CGAACAATG
sp-36312	AGTGGTTAGGGCCACTGTAAATAGTAATTAAGCCCTAAGCGTCTTGGTCGGTATTACCGGCTGGGGGTTTAG	AATAA	CAGTT	82	GAATGTAGG	AACAGGGCA	TGGAGGTTA	AAGCGCTAA
sp-36313	AGTGGTTAGGGCCACTGTAAATAGTAATTAAGCCCTAAGCGGCAGGGTTCTTCCCTGCGTTTAG	AATAA	CAGTT	74	TGGCCAACT	GAGCTACTT	CTATGCTAG	CAGAAAAGG
sp-36321	AGTGGTTAGGGCCACTGTAAATAGGCTTTAAGCCCTAAGCGTCCCGGCAGCTGCCGGGGGTAGTC	AATAA	AAAAA	75	ACACACATG	CTCGCCATT	TCACTACTC	AGTTCACAG
sp-36322	AGTGGTTAGGGCCACTGTAAATAGGCTTTAAGCCCTAAGCGTCTTGGTCGGTATTACCGGCTGGGGGTAGTC	AATAA	AAAAA	82	GATTGGGAC	ATCGATCCA	CGCTAACTA	TCTATACGC
sp-36323	AGTGGTTAGGGCCACTGTAAATAGGCTTTAAGCCCTAAGCGGCAGGGTTCTTCCCTGCGTAGTC	AATAA	AAAAA	74	ACCAGACTT	GACCGCATT	AGAGTAAGG	AATATCGGC
sp-36331	AGTGGTTAGGGCCACTGTAAATAGACATTAAGCCCTAAGCGTCCCGGCAGCTGCCGGGGGTTGTA	AATAA	TAACT	75	CCGCTTAGT	GCTACATGT	AGAGAGCTG	TTGCCTGAC
sp-36332	AGTGGTTAGGGCCACTGTAAATAGACATTAAGCCCTAAGCGTCTTGGTCGGTATTACCGGCTGGGGGTTGTA	AATAA	TAACT	82	GAATTTCGC	TAACACGCC	CCAGAATTC	TGTCTCCGA
sp-36333	AGTGGTTAGGGCCACTGTAAATAGACATTAAGCCCTAAGCGGCAGGGTTCTTCCCTGCGTTGTA	AATAA	TAACT	74	ACTGTTGGT	GACTGTGCT	GGCCATTTA	CAGGATGGT
sp-36341	AGTGGTTAGGGCCACTGTAAATAGGTGTTAAGCCCTAAGCGTCCCGGCAGCTGCCGGGGGTCACA	AATAA	TTAAT	75	TCACTCGAC	AAGTCCAGT	TCGTCCAAT	TTTCGCGTA
sp-36342	AGTGGTTAGGGCCACTGTAAATAGGTGTTAAGCCCTAAGCGTCTTGGTCGGTATTACCGGCTGGGGGTCACA	AATAA	TTAAT	82	GTGTTTGGA	ATGAACGCT	AACACCTGG	ACATGAGGA
sp-36343	AGTGGTTAGGGCCACTGTAAATAGGTGTTAAGCCCTAAGCGGCAGGGTTCTTCCCTGCGTCACA	AATAA	TTAAT	74	TACCTCGTG	GAGTTCGCT	CTATCTCCG	CCAGTTGAG
sp-36351	AGTGGTTAGGGCCACTGTAAATAGTTATTAAGCCCTAAGCGTCCCGGCAGCTGCCGGGGGTTAAC	AATAA	TAATA	75	TGCAGTAAG	AACGCAGTA	ATCAACACC	TGTGATCTG
sp-36352	AGTGGTTAGGGCCACTGTAAATAGTTATTAAGCCCTAAGCGTCTTGGTCGGTATTACCGGCTGGGGGTTAAC	AATAA	TAATA	82	ACCTCGTTA	AGGTACGCT	TTTGCCCAC	AGGAAGCTA
sp-36353	AGTGGTTAGGGCCACTGTAAATAGTTATTAAGCCCTAAGCGGCAGGGTTCTTCCCTGCGTTAAC	AATAA	TAATA	74	CGCTTACGA	CTTGCTACA	GTCACACAA	CACTGTCAC
sp-36411	AGTGGTTAGGGCCACTTTAAATAGTAATTAAGCCCTAAGCGTCCCGGCAGCTGCCGGGGGTTTAG	AATAA	CAGTT	75	CTTACGGTT	GCAGTTGAT	AGCTTGTTG	GAACTGAAG
sp-36412	AGTGGTTAGGGCCACTTTAAATAGTAATTAAGCCCTAAGCGTCTTGGTCGGTATTACCGGCTGGGGGTTTAG	AATAA	CAGTT	82	TTAGGGGTT	GTCTGCTAG	GCGATGCAA	CCACCATAT
sp-36413	AGTGGTTAGGGCCACTTTAAATAGTAATTAAGCCCTAAGCGGCAGGGTTCTTCCCTGCGTTTAG	AATAA	CAGTT	74	TCTACTGCG	ACAGTTGTC	TCCTGGCAT	TCCGATGGA
sp-36421	AGTGGTTAGGGCCACTTTAAATAGGCTTTAAGCCCTAAGCGTCCCGGCAGCTGCCGGGGGTAGTC	AATAA	AAAAA	75	CAACGAAAC	CAGTACAGC	GGAACAGTC	AGACTTCCT
sp-36422	AGTGGTTAGGGCCACTTTAAATAGGCTTTAAGCCCTAAGCGTCTTGGTCGGTATTACCGGCTGGGGGTAGTC	AATAA	AAAAA	82	GTTAGGGGT	AGTGTGTCT	ATATGCGTC	CTCAGTGAC
sp-36423	AGTGGTTAGGGCCACTTTAAATAGGCTTTAAGCCCTAAGCGGCAGGGTTCTTCCCTGCGTAGTC	AATAA	AAAAA	74	GCCAAGCTT	TGCTTGTGT	AACGAACGA	AGACCTTAC
sp-36431	AGTGGTTAGGGCCACTTTAAATAGACATTAAGCCCTAAGCGTCCCGGCAGCTGCCGGGGGTTGTA	AATAA	TAACT	75	GAACCGTAT	CTCCCAATG	TACAAGGCA	ACCAATACG
sp-36432	AGTGGTTAGGGCCACTTTAAATAGACATTAAGCCCTAAGCGTCTTGGTCGGTATTACCGGCTGGGGGTTGTA	AATAA	TAACT	82	ACTAGACCA	AATCTGGGT	GCTTTTCTG	AAACAGGTC
sp-36433	AGTGGTTAGGGCCACTTTAAATAGACATTAAGCCCTAAGCGGCAGGGTTCTTCCCTGCGTTGTA	AATAA	TAACT	74	ACTTAGCCT	CATCGCTTC	CGAAGGAGA	TCTGGATAC
sp-36441	AGTGGTTAGGGCCACTTTAAATAGGTGTTAAGCCCTAAGCGTCCCGGCAGCTGCCGGGGGTCACA	AATAA	TTAAT	75	TTGCTACCT	CGAAGAACT	TCAACGGGT	GGTTCAACG
sp-36442	AGTGGTTAGGGCCACTTTAAATAGGTGTTAAGCCCTAAGCGTCTTGGTCGGTATTACCGGCTGGGGGTCACA	AATAA	TTAAT	82	CTGTTGCAA	AATCCCGTT	GAGTGTTGC	CTTTCGACA
sp-36443	AGTGGTTAGGGCCACTTTAAATAGGTGTTAAGCCCTAAGCGGCAGGGTTCTTCCCTGCGTCACA	AATAA	TTAAT	74	GTGTGATGA	GGGGGATTA	AACCCAAAG	GTCCCGAAA
sp-36451	AGTGGTTAGGGCCACTTTAAATAGTTATTAAGCCCTAAGCGTCCCGGCAGCTGCCGGGGGTTAAC	AATAA	TAATA	75	TCTCCATGG	TTGCGCTCT	GGTCGATAT	AGAGGCCAT
sp-36452	AGTGGTTAGGGCCACTTTAAATAGTTATTAAGCCCTAAGCGTCTTGGTCGGTATTACCGGCTGGGGGTTAAC	AATAA	TAATA	82	AGTCTCCAA	ATAGACCCG	CCTTCTGCA	AGTACGCTC
sp-36453	AGTGGTTAGGGCCACTTTAAATAGTTATTAAGCCCTAAGCGGCAGGGTTCTTCCCTGCGTTAAC	AATAA	TAATA	74	GTCCACAGT	GACTCGAGA	AGCTCAGGA	ACTTCTAGG
sp-36511	AGTGGTTAGGGCCACTATAAACGTAATTAAGCCCTAAGCGTCCCGGCAGCTGCCGGGGGTTTAG	AATAA	CAGTT	74	ATTCGGAAG	ATCCTTGGG	CTCATGCTG	CTCTGTGTG
sp-36512	AGTGGTTAGGGCCACTATAAACGTAATTAAGCCCTAAGCGTCTTGGTCGGTATTACCGGCTGGGGGTTTAG	AATAA	CAGTT	81	AGTTCTGTG	CAAAACACG	CTCACTGAG	GGCAAACCA
sp-36513	AGTGGTTAGGGCCACTATAAACGTAATTAAGCCCTAAGCGGCAGGGTTCTTCCCTGCGTTTAG	AATAA	CAGTT	73	CCAATACAC	TTCCTCTGT	TGTCGTCAA	ACGGCGAAT
sp-36521	AGTGGTTAGGGCCACTATAAACGGCTTTAAGCCCTAAGCGTCCCGGCAGCTGCCGGGGGTAGTC	AATAA	AAAAA	74	GGACTGGAT	CGCAGTTAC	GACACTGGA	ATCCGTCAC
sp-36522	AGTGGTTAGGGCCACTATAAACGGCTTTAAGCCCTAAGCGTCTTGGTCGGTATTACCGGCTGGGGGTAGTC	AATAA	AAAAA	81	TCCATGCTC	CGGCATTAA	GGTGGTTAT	CATACTCCC
sp-36523	AGTGGTTAGGGCCACTATAAACGGCTTTAAGCCCTAAGCGGCAGGGTTCTTCCCTGCGTAGTC	AATAA	AAAAA	73	TTATGGCCT	GACAAGATC	CGTCCAAGA	TGCCTAAGA
sp-36531	AGTGGTTAGGGCCACTATAAACGACATTAAGCCCTAAGCGTCCCGGCAGCTGCCGGGGGTTGTA	AATAA	TAACT	74	AAAGCGCTT	ACGATTGGT	GTTGGTGAT	AGAGCGGTT
sp-36532	AGTGGTTAGGGCCACTATAAACGACATTAAGCCCTAAGCGTCTTGGTCGGTATTACCGGCTGGGGGTTGTA	AATAA	TAACT	81	CCTGTCTTA	TCGCCAAGA	GAGTCGTAT	ACGTATTCG
sp-36533	AGTGGTTAGGGCCACTATAAACGACATTAAGCCCTAAGCGGCAGGGTTCTTCCCTGCGTTGTA	AATAA	TAACT	73	CACTCCACT	CCGATGAGT	CCTCCGATT	CACTGAGCA
sp-36541	AGTGGTTAGGGCCACTATAAACGGTGTTAAGCCCTAAGCGTCCCGGCAGCTGCCGGGGGTCACA	AATAA	TTAAT	74	CGTACGAAT	CCTTTCGCA	CTTTGGAAC	TGCTTAGAC
sp-36542	AGTGGTTAGGGCCACTATAAACGGTGTTAAGCCCTAAGCGTCTTGGTCGGTATTACCGGCTGGGGGTCACA	AATAA	TTAAT	81	GTACGAGTT	GTGGCTCAA	ACGGCACAA	CGTAAGTCT
sp-36543	AGTGGTTAGGGCCACTATAAACGGTGTTAAGCCCTAAGCGGCAGGGTTCTTCCCTGCGTCACA	AATAA	TTAAT	73	GAGAACTGA	GGGGATTTA	TACCACGTT	ACTCAACCG
sp-36551	AGTGGTTAGGGCCACTATAAACGTTATTAAGCCCTAAGCGTCCCGGCAGCTGCCGGGGGTTAAC	AATAA	TAATA	74	TGCGTGAAT	GTTTGAACG	CGTGTAACT	TTTGAGGAC
sp-36552	AGTGGTTAGGGCCACTATAAACGTTATTAAGCCCTAAGCGTCTTGGTCGGTATTACCGGCTGGGGGTTAAC	AATAA	TAATA	81	AATAGCTCG	TCCGTCGTT	CATGAAGAC	ACCTTGTGA
sp-36553	AGTGGTTAGGGCCACTATAAACGTTATTAAGCCCTAAGCGGCAGGGTTCTTCCCTGCGTTAAC	AATAA	TAATA	73	CTCCTGAAG	ACCATCACC	AACCTAAGC	GTTCACTCG
sp-37111	AGTGGTGGCGGCCACTATAAATAGTAATTAAGCCGCCAGCGTCCCGGCAGCTGCCGGGGGTTTAG	AATAA	CAGTT	75	GTCGGAGTA	GAATGCGTA	CCGAACGAT	TCCTGCATA
sp-37112	AGTGGTGGCGGCCACTATAAATAGTAATTAAGCCGCCAGCGTCTTGGTCGGTATTACCGGCTGGGGGTTTAG	AATAA	CAGTT	82	GTTCCGTTA	AGTTCAGAC	TCCGCTGTT	AGGTTCCTG
sp-37113	AGTGGTGGCGGCCACTATAAATAGTAATTAAGCCGCCAGCGGCAGGGTTCTTCCCTGCGTTTAG	AATAA	CAGTT	74	GGCTTCACA	AACACCCTC	AACTGGGAA	CAGTCACAG
sp-37121	AGTGGTGGCGGCCACTATAAATAGGCTTTAAGCCGCCAGCGTCCCGGCAGCTGCCGGGGGTAGTC	AATAA	AAAAA	75	CAGTGTTAC	GGCAACAAT	TCCAATGGG	ACAGCCATC
sp-37122	AGTGGTGGCGGCCACTATAAATAGGCTTTAAGCCGCCAGCGTCTTGGTCGGTATTACCGGCTGGGGGTAGTC	AATAA	AAAAA	82	TTACAGGGT	TAAGCGCGA	GGTGCGATT	AGCCAAGAG
sp-37123	AGTGGTGGCGGCCACTATAAATAGGCTTTAAGCCGCCAGCGGCAGGGTTCTTCCCTGCGTAGTC	AATAA	AAAAA	74	TAGTTGCCA	GGTGTGGAA	ACACTCGAA	TCGAGTGAC
sp-37131	AGTGGTGGCGGCCACTATAAATAGACATTAAGCCGCCAGCGTCCCGGCAGCTGCCGGGGGTTGTA	AATAA	TAACT	75	GTGACTTGT	TGGCTATTC	CATGTTAGG	TGTGTGCAG
sp-37132	AGTGGTGGCGGCCACTATAAATAGACATTAAGCCGCCAGCGTCTTGGTCGGTATTACCGGCTGGGGGTTGTA	AATAA	TAACT	82	TCAAGCATC	CTAAGTGGT	GCACTTTCT	ACCACTAGG
sp-37133	AGTGGTGGCGGCCACTATAAATAGACATTAAGCCGCCAGCGGCAGGGTTCTTCCCTGCGTTGTA	AATAA	TAACT	74	CATGCCGTA	GGAGTGATT	TGCTTGCCT	CAGAGCTTG
sp-37141	AGTGGTGGCGGCCACTATAAATAGGTGTTAAGCCGCCAGCGTCCCGGCAGCTGCCGGGGGTCACA	AATAA	TTAAT	75	GTGCCTTAC	CTTACTTGC	GCTATCCGT	TCACGACCT
sp-37142	AGTGGTGGCGGCCACTATAAATAGGTGTTAAGCCGCCAGCGTCTTGGTCGGTATTACCGGCTGGGGGTCACA	AATAA	TTAAT	82	ATACCCGTT	GTGCACTGT	CCTTTATCG	TCTATCGTG
sp-37143	AGTGGTGGCGGCCACTATAAATAGGTGTTAAGCCGCCAGCGGCAGGGTTCTTCCCTGCGTCACA	AATAA	TTAAT	74	GCGAAGTGA	GGTCTTTGA	GGCATCTAT	TATGCCAAC
sp-37151	AGTGGTGGCGGCCACTATAAATAGTTATTAAGCCGCCAGCGTCCCGGCAGCTGCCGGGGGTTAAC	AATAA	TAATA	75	GAATACTGC	AGCCCTTCT	ACACAGAAC	CTAGCGTCT
sp-37152	AGTGGTGGCGGCCACTATAAATAGTTATTAAGCCGCCAGCGTCTTGGTCGGTATTACCGGCTGGGGGTTAAC	AATAA	TAATA	82	CATCTTGGA	CCAACGAAG	GCTCATCCT	AGGAGTCCT
sp-37153	AGTGGTGGCGGCCACTATAAATAGTTATTAAGCCGCCAGCGGCAGGGTTCTTCCCTGCGTTAAC	AATAA	TAATA	74	AAGTCAGCG	TCTCGTCGA	TCTTGGTGT	ATGGCGTAA
sp-37211	AGTGGTGGCGGCCACTATAAATAGGTAATTAAGCCGCCAGCGTCCCGGCAGCTGCCGGGGGTTTAG	AATAA	CAGTT	76	CTGCGTGTT	CCCTCAAAG	TCATCGTCG	GGTTCGCTT
sp-37212	AGTGGTGGCGGCCACTATAAATAGGTAATTAAGCCGCCAGCGTCTTGGTCGGTATTACCGGCTGGGGGTTTAG	AATAA	CAGTT	83	GGTAGATGC	TACCATCTG	ACCACACGT	GTCCGGTTA
sp-37213	AGTGGTGGCGGCCACTATAAATAGGTAATTAAGCCGCCAGCGGCAGGGTTCTTCCCTGCGTTTAG	AATAA	CAGTT	75	CATCGGTAC	TTCGGCAAG	GAGCAACAT	ACGCTACAA
sp-37221	AGTGGTGGCGGCCACTATAAATAGGGCTTTAAGCCGCCAGCGTCCCGGCAGCTGCCGGGGGTAGTC	AATAA	AAAAA	76	TCGTGGCAA	TCTAGGTAC	TGACTGCCT	TCTGAGTGA
sp-37222	AGTGGTGGCGGCCACTATAAATAGGGCTTTAAGCCGCCAGCGTCTTGGTCGGTATTACCGGCTGGGGGTAGTC	AATAA	AAAAA	83	ATCGCCTAC	ACCGAAAGA	CCAAAACAG	GCTAAGACA
sp-37223	AGTGGTGGCGGCCACTATAAATAGGGCTTTAAGCCGCCAGCGGCAGGGTTCTTCCCTGCGTAGTC	AATAA	AAAAA	75	TCTGCTCAC	ATCTGCACT	GTCGGTCAA	CTCTCGTAT
sp-37231	AGTGGTGGCGGCCACTATAAATAGGACATTAAGCCGCCAGCGTCCCGGCAGCTGCCGGGGGTTGTA	AATAA	TAACT	76	TTGACCTCT	TCCGCTTCA	GCAGAGATA	GCACGTTAG
sp-37232	AGTGGTGGCGGCCACTATAAATAGGACATTAAGCCGCCAGCGTCTTGGTCGGTATTACCGGCTGGGGGTTGTA	AATAA	TAACT	83	GCATCTTCT	AGAATCAGC	AATCACCCT	CAATGCCTG
sp-37233	AGTGGTGGCGGCCACTATAAATAGGACATTAAGCCGCCAGCGGCAGGGTTCTTCCCTGCGTTGTA	AATAA	TAACT	75	ATGCTAGCT	CTCATTCTC	AGACGAGGA	ATATGGAGG
sp-37241	AGTGGTGGCGGCCACTATAAATAGGGTGTTAAGCCGCCAGCGTCCCGGCAGCTGCCGGGGGTCACA	AATAA	TTAAT	76	CGCTTCATG	GGAGGGTAT	ACGGACGTA	TTCTTAGCG
sp-37242	AGTGGTGGCGGCCACTATAAATAGGGTGTTAAGCCGCCAGCGTCTTGGTCGGTATTACCGGCTGGGGGTCACA	AATAA	TTAAT	83	CATCACTTG	TCATGGACT	TCCTGAGGA	CTCCGAACA
sp-37243	AGTGGTGGCGGCCACTATAAATAGGGTGTTAAGCCGCCAGCGGCAGGGTTCTTCCCTGCGTCACA	AATAA	TTAAT	75	TTAGACCGC	CATGCCCTT	CTCAAACAG	CTTCTCTGG
sp-37251	AGTGGTGGCGGCCACTATAAATAGGTTATTAAGCCGCCAGCGTCCCGGCAGCTGCCGGGGGTTAAC	AATAA	TAATA	76	ACCGTACCA	ACGCGTATC	GAGCTCAAT	TTACAGCTG
sp-37252	AGTGGTGGCGGCCACTATAAATAGGTTATTAAGCCGCCAGCGTCTTGGTCGGTATTACCGGCTGGGGGTTAAC	AATAA	TAATA	83	AAGTGGCTC	CAACACGTA	AGGATCCTC	TCACTCTGG
sp-37253	AGTGGTGGCGGCCACTATAAATAGGTTATTAAGCCGCCAGCGGCAGGGTTCTTCCCTGCGTTAAC	AATAA	TAATA	75	GTTCTTGTG	CCCGAAGTA	AGTAGAGAC	CCCCATAGT
sp-37311	AGTGGTGGCGGCCACTGTAAATAGTAATTAAGCCGCCAGCGTCCCGGCAGCTGCCGGGGGTTTAG	AATAA	CAGTT	75	AGTGCAGCA	ACCCGAAGA	CGTGCGTAT	ACCGGATAA
sp-37312	AGTGGTGGCGGCCACTGTAAATAGTAATTAAGCCGCCAGCGTCTTGGTCGGTATTACCGGCTGGGGGTTTAG	AATAA	CAGTT	82	AAACCTTCC	AGCTGACCT	AGCGAATGA	ACTGGCGAT
sp-37313	AGTGGTGGCGGCCACTGTAAATAGTAATTAAGCCGCCAGCGGCAGGGTTCTTCCCTGCGTTTAG	AATAA	CAGTT	74	GTGCCAATA	CCAACTCTT	ACGGATCCT	CCTTTGCTA
sp-37321	AGTGGTGGCGGCCACTGTAAATAGGCTTTAAGCCGCCAGCGTCCCGGCAGCTGCCGGGGGTAGTC	AATAA	AAAAA	75	CGAGGTTTC	GTACACCTG	CGAGTAATG	AATCTGGCG
sp-37322	AGTGGTGGCGGCCACTGTAAATAGGCTTTAAGCCGCCAGCGTCTTGGTCGGTATTACCGGCTGGGGGTAGTC	AATAA	AAAAA	82	TCGTGTATC	TCCGTGTCT	ACGGTTTTG	ACCACTTTC
sp-37323	AGTGGTGGCGGCCACTGTAAATAGGCTTTAAGCCGCCAGCGGCAGGGTTCTTCCCTGCGTAGTC	AATAA	AAAAA	74	CGCATGTAT	CGTACTACC	TGACACCTG	TTACGACCG
sp-37331	AGTGGTGGCGGCCACTGTAAATAGACATTAAGCCGCCAGCGTCCCGGCAGCTGCCGGGGGTTGTA	AATAA	TAACT	75	CTCGTAATG	GTGAAAGCT	TGATGTGCG	CGTTAGCGT
sp-37332	AGTGGTGGCGGCCACTGTAAATAGACATTAAGCCGCCAGCGTCTTGGTCGGTATTACCGGCTGGGGGTTGTA	AATAA	TAACT	82	AGAGTGGGA	AAGGGGTTT	CACCAATCT	CTCGATTCA
sp-37333	AGTGGTGGCGGCCACTGTAAATAGACATTAAGCCGCCAGCGGCAGGGTTCTTCCCTGCGTTGTA	AATAA	TAACT	74	AAGCTCAAG	CGCCTATGA	GGATCCCAA	GTGCTCCAA
sp-37341	AGTGGTGGCGGCCACTGTAAATAGGTGTTAAGCCGCCAGCGTCCCGGCAGCTGCCGGGGGTCACA	AATAA	TTAAT	75	AAGGCCATT	ACCCTGTAG	TTGCACTTC	ACTGGTCAA
sp-37342	AGTGGTGGCGGCCACTGTAAATAGGTGTTAAGCCGCCAGCGTCTTGGTCGGTATTACCGGCTGGGGGTCACA	AATAA	TTAAT	82	GGCTAACGT	CCGGATTAT	CACCTAGCT	TTCCAAGGT
sp-37343	AGTGGTGGCGGCCACTGTAAATAGGTGTTAAGCCGCCAGCGGCAGGGTTCTTCCCTGCGTCACA	AATAA	TTAAT	74	TGATCGTTC	GGCGAATCT	CGATTGGCT	ACTCTTAGC
sp-37351	AGTGGTGGCGGCCACTGTAAATAGTTATTAAGCCGCCAGCGTCCCGGCAGCTGCCGGGGGTTAAC	AATAA	TAATA	75	GGCTTAGAG	TGCACGATG	CGCATAAGT	GCTTGTTAC
sp-37352	AGTGGTGGCGGCCACTGTAAATAGTTATTAAGCCGCCAGCGTCTTGGTCGGTATTACCGGCTGGGGGTTAAC	AATAA	TAATA	82	ACGACAAGG	TTTGCTCCC	TCTTAGGGA	ATACACGTG
sp-37353	AGTGGTGGCGGCCACTGTAAATAGTTATTAAGCCGCCAGCGGCAGGGTTCTTCCCTGCGTTAAC	AATAA	TAATA	74	GTCGACTTA	CTCATAGGG	ATTCGGGGT	TGAGTTCCG
sp-37411	AGTGGTGGCGGCCACTTTAAATAGTAATTAAGCCGCCAGCGTCCCGGCAGCTGCCGGGGGTTTAG	AATAA	CAGTT	75	AAGCGTGAG	TGACAGCAA	TTACTCCGT	TCCATTCGT
sp-37412	AGTGGTGGCGGCCACTTTAAATAGTAATTAAGCCGCCAGCGTCTTGGTCGGTATTACCGGCTGGGGGTTTAG	AATAA	CAGTT	82	CTTACGATC	AAGACTCTG	TCTGATCGA	CTCAAAGTG
sp-37413	AGTGGTGGCGGCCACTTTAAATAGTAATTAAGCCGCCAGCGGCAGGGTTCTTCCCTGCGTTTAG	AATAA	CAGTT	74	GTTCGTCTG	TAAGGACGC	TGTAGTCAG	CACAAGACG
sp-37421	AGTGGTGGCGGCCACTTTAAATAGGCTTTAAGCCGCCAGCGTCCCGGCAGCTGCCGGGGGTAGTC	AATAA	AAAAA	75	CGATGTACT	CCAATTCCA	CCAAAGACC	ACTCTGTGA
sp-37422	AGTGGTGGCGGCCACTTTAAATAGGCTTTAAGCCGCCAGCGTCTTGGTCGGTATTACCGGCTGGGGGTAGTC	AATAA	AAAAA	82	TCGAAGAGG	TCGGTCAAA	TCCATTAGC	CTCCTAGGT
sp-37423	AGTGGTGGCGGCCACTTTAAATAGGCTTTAAGCCGCCAGCGGCAGGGTTCTTCCCTGCGTAGTC	AATAA	AAAAA	74	AGGGTCTTT	CCTAACCTC	GCCTTAAGG	CATGTTACC
sp-37431	AGTGGTGGCGGCCACTTTAAATAGACATTAAGCCGCCAGCGTCCCGGCAGCTGCCGGGGGTTGTA	AATAA	TAACT	75	TTTGAGCCC	GGATCGTTG	GATTCCGTT	AGAGGTGCT
sp-37432	AGTGGTGGCGGCCACTTTAAATAGACATTAAGCCGCCAGCGTCTTGGTCGGTATTACCGGCTGGGGGTTGTA	AATAA	TAACT	82	CACCTTTCT	GAATAACCC	ATGACTGGT	TGTGCTAGT
sp-37433	AGTGGTGGCGGCCACTTTAAATAGACATTAAGCCGCCAGCGGCAGGGTTCTTCCCTGCGTTGTA	AATAA	TAACT	74	TCCAGTACA	AACCACGAT	TGATACGCT	TGAACCCAA
sp-37441	AGTGGTGGCGGCCACTTTAAATAGGTGTTAAGCCGCCAGCGTCCCGGCAGCTGCCGGGGGTCACA	AATAA	TTAAT	75	AGCCTAGAT	CTCTCGCTA	AGGCAAGAC	CGGATGTAC
sp-37442	AGTGGTGGCGGCCACTTTAAATAGGTGTTAAGCCGCCAGCGTCTTGGTCGGTATTACCGGCTGGGGGTCACA	AATAA	TTAAT	82	TATTGCTCG	CTCGTCCTT	CCAGAAGTT	CTTTTCGCG
sp-37443	AGTGGTGGCGGCCACTTTAAATAGGTGTTAAGCCGCCAGCGGCAGGGTTCTTCCCTGCGTCACA	AATAA	TTAAT	74	AAAACGCCG	TACGACTCC	GACCCAATT	CCAATGCTG
sp-37451	AGTGGTGGCGGCCACTTTAAATAGTTATTAAGCCGCCAGCGTCCCGGCAGCTGCCGGGGGTTAAC	AATAA	TAATA	75	GAAATGGCA	TAGCTCCAA	GATGAGGTC	CCATGGAAG
sp-37452	AGTGGTGGCGGCCACTTTAAATAGTTATTAAGCCGCCAGCGTCTTGGTCGGTATTACCGGCTGGGGGTTAAC	AATAA	TAATA	82	GTTGAAGAC	CATGCAAAC	ATTCCGACA	TTCGACAGG
sp-37453	AGTGGTGGCGGCCACTTTAAATAGTTATTAAGCCGCCAGCGGCAGGGTTCTTCCCTGCGTTAAC	AATAA	TAATA	74	CCTAAGTCG	TCACCTTTC	ACATTCGGT	GGTCGAACT
sp-37511	AGTGGTGGCGGCCACTATAAACGTAATTAAGCCGCCAGCGTCCCGGCAGCTGCCGGGGGTTTAG	AATAA	CAGTT	74	CAGATCGGT	CTGCACAGA	GATACTGGG	ACGAAACGA
sp-37512	AGTGGTGGCGGCCACTATAAACGTAATTAAGCCGCCAGCGTCTTGGTCGGTATTACCGGCTGGGGGTTTAG	AATAA	CAGTT	81	AGAGGAGTA	TGGGGTTTA	GCGTCAAAC	TACTACCGG
sp-37513	AGTGGTGGCGGCCACTATAAACGTAATTAAGCCGCCAGCGGCAGGGTTCTTCCCTGCGTTTAG	AATAA	CAGTT	73	CCCCTCTAA	TTTGCCGGA	CCGCACTTT	ACCAGGGAT
sp-37521	AGTGGTGGCGGCCACTATAAACGGCTTTAAGCCGCCAGCGTCCCGGCAGCTGCCGGGGGTAGTC	AATAA	AAAAA	74	GGAGTACAT	GAAAAGCAC	CGTTTGAAG	CCTCAGCAT
sp-37522	AGTGGTGGCGGCCACTATAAACGGCTTTAAGCCGCCAGCGTCTTGGTCGGTATTACCGGCTGGGGGTAGTC	AATAA	AAAAA	81	CGTTATCTC	CCCTAATAG	AATGGCACA	AGAACGTGG
sp-37523	AGTGGTGGCGGCCACTATAAACGGCTTTAAGCCGCCAGCGGCAGGGTTCTTCCCTGCGTAGTC	AATAA	AAAAA	73	GAACGTGAG	GAATTGTGC	CGGATCAGT	GATTCGTGA
sp-37531	AGTGGTGGCGGCCACTATAAACGACATTAAGCCGCCAGCGTCCCGGCAGCTGCCGGGGGTTGTA	AATAA	TAACT	74	TCTTTGGAC	CGATATTCC	GTTCCAAGA	CCACTCTTG
sp-37532	AGTGGTGGCGGCCACTATAAACGACATTAAGCCGCCAGCGTCTTGGTCGGTATTACCGGCTGGGGGTTGTA	AATAA	TAACT	81	AGTCGGAGT	TTGATGACC	CACTATGCG	TGGGACTTA
sp-37533	AGTGGTGGCGGCCACTATAAACGACATTAAGCCGCCAGCGGCAGGGTTCTTCCCTGCGTTGTA	AATAA	TAACT	73	TCAACGAGA	CTACCAGTT	GCTGAAAGT	AATAGTCGC
sp-37541	AGTGGTGGCGGCCACTATAAACGGTGTTAAGCCGCCAGCGTCCCGGCAGCTGCCGGGGGTCACA	AATAA	TTAAT	74	AGTAGAGCT	GTACTTGTC	ACGGATTCC	CATTCGCAT
sp-37542	AGTGGTGGCGGCCACTATAAACGGTGTTAAGCCGCCAGCGTCTTGGTCGGTATTACCGGCTGGGGGTCACA	AATAA	TTAAT	81	ACCAACTCC	GTTCCTGAG	TCGACCATT	GCTAGTCCA
sp-37543	AGTGGTGGCGGCCACTATAAACGGTGTTAAGCCGCCAGCGGCAGGGTTCTTCCCTGCGTCACA	AATAA	TTAAT	73	GTTGGAGAG	GTCGTTCGA	ACCACTTCG	TAATTCCCC
sp-37551	AGTGGTGGCGGCCACTATAAACGTTATTAAGCCGCCAGCGTCCCGGCAGCTGCCGGGGGTTAAC	AATAA	TAATA	74	TGTTGCCAT	CCTCGAGAA	ACCCGTTCA	CTCCCATAC
sp-37552	AGTGGTGGCGGCCACTATAAACGTTATTAAGCCGCCAGCGTCTTGGTCGGTATTACCGGCTGGGGGTTAAC	AATAA	TAATA	81	GTCAATCCT	TTGAGTGGT	GTGGTCAGA	GCTAGTAGC
sp-37553	AGTGGTGGCGGCCACTATAAACGTTATTAAGCCGCCAGCGGCAGGGTTCTTCCCTGCGTTAAC	AATAA	TAATA	73	TCGTCAAGT	AGGTCCTCT	CAGTTAGCT	ACCAAGCCT
sp-41111	AGCCGTCTGGGCGGCTATAAATAGTAATTAGGCCCAGAGCGTCCCGGCAGCTGCCGGGGGTTTAG	TATAA	CAGTT	75	AGTTATCCC	CAGTGTGTG	GACTATGAG	AAGGCGTCA
sp-41112	AGCCGTCTGGGCGGCTATAAATAGTAATTAGGCCCAGAGCGTCTTGGTCGGTATTACCGGCTGGGGGTTTAG	TATAA	CAGTT	82	TGAGATCTC	TAGAGGAGT	CTCACATAG	TGTCCCTGA
sp-41113	AGCCGTCTGGGCGGCTATAAATAGTAATTAGGCCCAGAGCGGCAGGGTTCTTCCCTGCGTTTAG	TATAA	CAGTT	74	CATACCGTT	GCGATCACA	ACGGTAAAG	CGGTTGTGT
sp-41121	AGCCGTCTGGGCGGCTATAAATAGGCTTTAGGCCCAGAGCGTCCCGGCAGCTGCCGGGGGTAGTC	TATAA	AAAAA	75	GTTAGCTGC	TTAGGCTCC	GGACTTTGC	CTGACCATC
sp-41122	AGCCGTCTGGGCGGCTATAAATAGGCTTTAGGCCCAGAGCGTCTTGGTCGGTATTACCGGCTGGGGGTAGTC	TATAA	AAAAA	82	TGAATGCGC	CTGTGACCA	TCCAAACCA	CGAATAGAG
sp-41123	AGCCGTCTGGGCGGCTATAAATAGGCTTTAGGCCCAGAGCGGCAGGGTTCTTCCCTGCGTAGTC	TATAA	AAAAA	74	GTAAGGGGA	CTTATCTCG	TTAGGCTGA	TGTCGTAAC
sp-41131	AGCCGTCTGGGCGGCTATAAATAGACATTAGGCCCAGAGCGTCCCGGCAGCTGCCGGGGGTTGTA	TATAA	TAACT	75	TCAACGGTG	CGATAACCT	AGCAATGCA	CAACACAGT
sp-41132	AGCCGTCTGGGCGGCTATAAATAGACATTAGGCCCAGAGCGTCTTGGTCGGTATTACCGGCTGGGGGTTGTA	TATAA	TAACT	82	CAGTAAGGG	GTTCCACCA	CACAAGGTT	CTAGGCAAG
sp-41133	AGCCGTCTGGGCGGCTATAAATAGACATTAGGCCCAGAGCGGCAGGGTTCTTCCCTGCGTTGTA	TATAA	TAACT	74	ATTGGCTTC	ACCTACTTC	TCCTAGCAG	AATCGAAGC
sp-41141	AGCCGTCTGGGCGGCTATAAATAGGTGTTAGGCCCAGAGCGTCCCGGCAGCTGCCGGGGGTCACA	TATAA	TTAAT	75	ACAATGCGT	GTACACCCT	TCAACGTTC	ATGTCGAAG
sp-41142	AGCCGTCTGGGCGGCTATAAATAGGTGTTAGGCCCAGAGCGTCTTGGTCGGTATTACCGGCTGGGGGTCACA	TATAA	TTAAT	82	TCTCCTGTA	GCATTGTGG	ACATCCTAG	CAGCTCTCT
sp-41143	AGCCGTCTGGGCGGCTATAAATAGGTGTTAGGCCCAGAGCGGCAGGGTTCTTCCCTGCGTCACA	TATAA	TTAAT	74	GCTATCGTA	ATTCGACTC	CGTTATGAG	GGTTGCAGT
sp-41151	AGCCGTCTGGGCGGCTATAAATAGTTATTAGGCCCAGAGCGTCCCGGCAGCTGCCGGGGGTTAAC	TATAA	TAATA	75	CCCGCTTTA	TAACGGCGT	TGCACGAAA	GATCGTTAC
sp-41152	AGCCGTCTGGGCGGCTATAAATAGTTATTAGGCCCAGAGCGTCTTGGTCGGTATTACCGGCTGGGGGTTAAC	TATAA	TAATA	82	CGGTATCAT	ATGACCTCG	TTCAACTGG	ATTCGAGGA
sp-41153	AGCCGTCTGGGCGGCTATAAATAGTTATTAGGCCCAGAGCGGCAGGGTTCTTCCCTGCGTTAAC	TATAA	TAATA	74	TATGGGCAT	GGGATAGCT	CCTATGGTG	TACATCCTC
sp-41211	AGCCGTCTGGGCGGCTATAAATAGGTAATTAGGCCCAGAGCGTCCCGGCAGCTGCCGGGGGTTTAG	TATAA	CAGTT	76	CCACTAACC	CCAACAGTG	TTCACCGGT	TGAGTCCTG
sp-41212	AGCCGTCTGGGCGGCTATAAATAGGTAATTAGGCCCAGAGCGTCTTGGTCGGTATTACCGGCTGGGGGTTTAG	TATAA	CAGTT	83	TACGATCAG	GTCGTGACT	TCAGGCAAA	GTACATGGC
sp-41213	AGCCGTCTGGGCGGCTATAAATAGGTAATTAGGCCCAGAGCGGCAGGGTTCTTCCCTGCGTTTAG	TATAA	CAGTT	75	ATCCAAAGC	GCCTTAAAC	ACGGAATGG	GATATTCGC
sp-41221	AGCCGTCTGGGCGGCTATAAATAGGGCTTTAGGCCCAGAGCGTCCCGGCAGCTGCCGGGGGTAGTC	TATAA	AAAAA	76	TTTCGCATG	TTTGGAGCA	CCCCGTTTT	CAGAGCTAA
sp-41222	AGCCGTCTGGGCGGCTATAAATAGGGCTTTAGGCCCAGAGCGTCTTGGTCGGTATTACCGGCTGGGGGTAGTC	TATAA	AAAAA	83	AAGTTCGCA	ACCCTGATG	GCTTATTGC	TCTTCACGA
sp-41223	AGCCGTCTGGGCGGCTATAAATAGGGCTTTAGGCCCAGAGCGGCAGGGTTCTTCCCTGCGTAGTC	TATAA	AAAAA	75	ATGGTTCAG	CACTCACGA	TTCGCCATC	ATTATCGCG
sp-41231	AGCCGTCTGGGCGGCTATAAATAGGACATTAGGCCCAGAGCGTCCCGGCAGCTGCCGGGGGTTGTA	TATAA	TAACT	76	ACGTACGAA	TCTGTAGCT	TACCTGCCA	GTCTAGCAT
sp-41232	AGCCGTCTGGGCGGCTATAAATAGGACATTAGGCCCAGAGCGTCTTGGTCGGTATTACCGGCTGGGGGTTGTA	TATAA	TAACT	83	TGATCCCAG	CCATAGTGG	GAGAAACGA	AGTCAGTGA
sp-41233	AGCCGTCTGGGCGGCTATAAATAGGACATTAGGCCCAGAGCGGCAGGGTTCTTCCCTGCGTTGTA	TATAA	TAACT	75	GACTTACCG	TGCACGCAT	ATCTCCACC	CGGCTAACT
sp-41241	AGCCGTCTGGGCGGCTATAAATAGGGTGTTAGGCCCAGAGCGTCCCGGCAGCTGCCGGGGGTCACA	TATAA	TTAAT	76	GAAAGCATC	AAGACCGTT	ACACCGAAT	TCTACGCAG
sp-41242	AGCCGTCTGGGCGGCTATAAATAGGGTGTTAGGCCCAGAGCGTCTTGGTCGGTATTACCGGCTGGGGGTCACA	TATAA	TTAAT	83	TCCTGGGTT	TTTGTCGAG	TATATCGCG	GGCCACATT
sp-41243	AGCCGTCTGGGCGGCTATAAATAGGGTGTTAGGCCCAGAGCGGCAGGGTTCTTCCCTGCGTCACA	TATAA	TTAAT	75	TGTACTCCT	CTAGGAACG	CCAACGTGA	TTCGGTGCA
sp-41251	AGCCGTCTGGGCGGCTATAAATAGGTTATTAGGCCCAGAGCGTCCCGGCAGCTGCCGGGGGTTAAC	TATAA	TAATA	76	CCCTGTTTG	CGTGCCATT	TCTCTTCGT	TCTGACAGT
sp-41252	AGCCGTCTGGGCGGCTATAAATAGGTTATTAGGCCCAGAGCGTCTTGGTCGGTATTACCGGCTGGGGGTTAAC	TATAA	TAATA	83	TACCAGTGC	GTTCGGTCA	TTCCGTAGC	CTACTGGCT
sp-41253	AGCCGTCTGGGCGGCTATAAATAGGTTATTAGGCCCAGAGCGGCAGGGTTCTTCCCTGCGTTAAC	TATAA	TAATA	75	GCGAGAAAT	TGCCATCTT	CCTAGATGA	GAAGCGAGT
sp-41311	AGCCGTCTGGGCGGCTGTAAATAGTAATTAGGCCCAGAGCGTCCCGGCAGCTGCCGGGGGTTTAG	TATAA	CAGTT	75	GTAGCCCAT	CGGGACTAA	GGATGTCCA	CAAACGTTC
sp-41312	AGCCGTCTGGGCGGCTGTAAATAGTAATTAGGCCCAGAGCGTCTTGGTCGGTATTACCGGCTGGGGGTTTAG	TATAA	CAGTT	82	CCTTACAGT	ACTCATCTC	TGAGGTTCC	AGCCAAAGA
sp-41313	AGCCGTCTGGGCGGCTGTAAATAGTAATTAGGCCCAGAGCGGCAGGGTTCTTCCCTGCGTTTAG	TATAA	CAGTT	74	ACTCGTGGT	GCTTCCAGT	GCGGATTAA	CGCCTGTTA
sp-41321	AGCCGTCTGGGCGGCTGTAAATAGGCTTTAGGCCCAGAGCGTCCCGGCAGCTGCCGGGGGTAGTC	TATAA	AAAAA	75	AAGCAGCCA	AGGTCGTTG	TTCATGCGA	TGTACCGCA
sp-41322	AGCCGTCTGGGCGGCTGTAAATAGGCTTTAGGCCCAGAGCGTCTTGGTCGGTATTACCGGCTGGGGGTAGTC	TATAA	AAAAA	82	GAGGAGAAG	TTCCCGCAT	AGCACAGTA	TCTCCGGAA
sp-41323	AGCCGTCTGGGCGGCTGTAAATAGGCTTTAGGCCCAGAGCGGCAGGGTTCTTCCCTGCGTAGTC	TATAA	AAAAA	74	TGAACCATG	CAGGTATCA	ACGAAGCCA	TCTAAGCTC
sp-41331	AGCCGTCTGGGCGGCTGTAAATAGACATTAGGCCCAGAGCGTCCCGGCAGCTGCCGGGGGTTGTA	TATAA	TAACT	75	GTCAGTTGG	CCGAAATTC	CAACAGTAG	AGTAGCACA
sp-41332	AGCCGTCTGGGCGGCTGTAAATAGACATTAGGCCCAGAGCGTCTTGGTCGGTATTACCGGCTGGGGGTTGTA	TATAA	TAACT	82	AATTGGGCC	GCTCCTTTC	CGCACACAA	ATCACCGAT
sp-41333	AGCCGTCTGGGCGGCTGTAAATAGACATTAGGCCCAGAGCGGCAGGGTTCTTCCCTGCGTTGTA	TATAA	TAACT	74	GCAAACGCT	GGTTATACG	GCTTCACTT	ATATCCAGG
sp-41341	AGCCGTCTGGGCGGCTGTAAATAGGTGTTAGGCCCAGAGCGTCCCGGCAGCTGCCGGGGGTCACA	TATAA	TTAAT	75	CCCTTGCAT	CATCCAGTT	GAATGCGGT	CATGCCAGT
sp-41342	AGCCGTCTGGGCGGCTGTAAATAGGTGTTAGGCCCAGAGCGTCTTGGTCGGTATTACCGGCTGGGGGTCACA	TATAA	TTAAT	82	ACTAGGCAC	CACTCCATA	TGTGTACCT	GCAACATGC
sp-41343	AGCCGTCTGGGCGGCTGTAAATAGGTGTTAGGCCCAGAGCGGCAGGGTTCTTCCCTGCGTCACA	TATAA	TTAAT	74	GTGATCCCT	CGTGTTGGA	CGCTTGACA	AAGCGTCTA
sp-41351	AGCCGTCTGGGCGGCTGTAAATAGTTATTAGGCCCAGAGCGTCCCGGCAGCTGCCGGGGGTTAAC	TATAA	TAATA	75	GGATACGAC	CGATGGTTG	GACGTTGAC	AGCTCTTTG
sp-41352	AGCCGTCTGGGCGGCTGTAAATAGTTATTAGGCCCAGAGCGTCTTGGTCGGTATTACCGGCTGGGGGTTAAC	TATAA	TAATA	82	CTCTGGCAT	GAGTCCTAC	TCGTTACGC	ATGCTAGTG
sp-41353	AGCCGTCTGGGCGGCTGTAAATAGTTATTAGGCCCAGAGCGGCAGGGTTCTTCCCTGCGTTAAC	TATAA	TAATA	74	AGCTTGTCT	TCAAACGCA	TGGACAGTG	GATCATGCT
sp-41411	AGCCGTCTGGGCGGCTTTAAATAGTAATTAGGCCCAGAGCGTCCCGGCAGCTGCCGGGGGTTTAG	TATAA	CAGTT	75	ATCGCTGCA	AAGGGCACT	ATTGGATGG	GGACCATGA
sp-41412	AGCCGTCTGGGCGGCTTTAAATAGTAATTAGGCCCAGAGCGTCTTGGTCGGTATTACCGGCTGGGGGTTTAG	TATAA	CAGTT	82	TAATGTCGC	GATAGACAC	ACCACTCTA	GTGGCATAG
sp-41413	AGCCGTCTGGGCGGCTTTAAATAGTAATTAGGCCCAGAGCGGCAGGGTTCTTCCCTGCGTTTAG	TATAA	CAGTT	74	CGTCCCAAT	AAGGATGTG	TTACAGTCG	GACCAAACA
[truncated: 1,004 more rows]

## Sheet: Ordered Oligo Pool
AGCGGCCGCGACTCTAGAGGTAAATATTCGTCATGGCGAATTAAAACAGGGTATTAAGCCATGAGCGGAGGAGATAAAAATCTCCTCATTACCAATATTCCGGAGCCATACCACATTTGCGCATACTAAGCCGGAAAGGGGGAGA	145
AGCGGCCGCGACTCTAGAGGACAATTGTCGACCAGGCGACATAAAATAGCCTCTAAGCCTGGTGCGTGCTATACATTTTCACATGTATAGCGGCTGGTTTTATTCCGGAGCCATACCACATTCTCGGATTCTAAGCCGGAAAGGGGGAGA	150
AGCGGCCGCGACTCTAGAGGCTGCTCGTCGGTTTGGCGACGATAAAGAGGTTTTTAGGCCAAACGCGGCAGCATGCAGTATCTAGAGCGTGCTGCGGAACAATGAATCCGGAGCCATACCACATTGGCTATCTCTAAGCCGGAAAGGGGGAGA	153
AGCGGCCGCGACTCTAGAGGGATAAAGCTGACTAGGCAGCTATAAATAGTACTTAAGCCTAGTGCGTTGGAGAATATTGTGAAATATGCTCCAGGTGTAAAAAGATCCGGAGCCATACCACATAATGAGCAGCTAAGCCGGAAAGGGGGAGA	152
AGCGGCCGCGACTCTAGAGGTGCCAAGTGGGTCACTCCACTCAAAAGAGACCATTAAGAGTGACGCGTTGGTGAGAGTAATCTCACCAGGTTGGTTGTTATCCGGAGCCATACCACATACTTCAGGGCTAAGCCGGAAAGGGGGAGA	147
AGCGGCCGCGACTCTAGAGGTGCCAAGTGGACTACTCCACTCAAAAGAGACCATTAAGAGTAGTGCGTTGGTGAGAGTAATCTCACCAGGTTGGTTGTTATCCGGAGCCATACCACATATTGGGCGTCTAAGCCGGAAAGGGGGAGA	147
AGCGGCCGCGACTCTAGAGGGGTAACGTCGTTTGGGCGACGTAAAATAGCCGTCAAGCCCAAAGCGTAGAGAGCTCCGAGTTGGAAGTTGGAGCTCTCTGGTCGGGGATAATCCGGAGCCATACCACATCGTCCCTAACTAAGCCGGAAAGGGGGAGA	158
AGCGGCCGCGACTCTAGAGGTGGCTCGTGGATCAGGCCACGTTAAAAAGCGGTTTAAGCCTGATGCGTCTGGTCGCTTTCGATCGGGGTCCGTCAGGTTCCGGAGCCATACCACATAGGCTTATCCTAAGCCGGAAAGGGGGAGA	145
AGCGGCCGCGACTCTAGAGGAATAAACTCGATACCGCGAGTATAAACAGAACTTAGGCGGTATGCGGCGGTCACAGTTTCATAACGGATAATATATACTGTGACCGCGTGTTACTGGTTCCGGAGCCATACCACATCCTCTAAGACTAAGCCGGAAAGGGGGAGA	165
AGCGGCCGCGACTCTAGAGGTACACAGCCGTTTGCGCGGCTACAAAATAGACCTTAGGCGCAAAGCGTGTGACGGGCATATGTTTAGCCCGTCACGGTAGGTAAAAATTCCGGAGCCATACCACATTTGCGGAGACTAAGCCGGAAAGGGGGAGA	155
AGCGGCCGCGACTCTAGAGGATCTTTGCCGTTTGAGCGGCATTAAACAGGTCTTAAGCTCAAAGCGTCACCGCCTACAATGCTAGGCGGTGGGTGACAACAATTCCGGAGCCATACCACATTGCCAGTGTCTAAGCCGGAAAGGGGGAGA	150
AGCGGCCGCGACTCTAGAGGGTCATCGTGGTTAGGGCCACGTTAAATAGTTGCTTAAGCCCTAAGCGTTGATAAATATCAGGTGCAATCAGGTCCGGAGCCATACCACATAACGGATTCCTAAGCCGGAAAGGGGGAGA	139
AGCGGCCGCGACTCTAGAGGAATTAACTCGTTTGAGCGAGTATAAACAGTTGGTTAGGCTCAAAGCGGAGAGCAGATCGTCTGCTCTCGTCCAAATTAATCCGGAGCCATACCACATCGTTGCTTACTAAGCCGGAAAGGGGGAGA	146
AGCGGCCGCGACTCTAGAGGAAGTAACTCGACTAGGCGAGTATAAACAGCGTTTAGGCCTAGTGCGGTTCAATTCCATTCCTAAAATGGAATTGAACATACGCCGTGCTCCGGAGCCATACCACATTGTAAGCTGCTAAGCCGGAAAGGGGGAGA	155
AGCGGCCGCGACTCTAGAGGATAAGAGTCGTTGTGGCGACTATAACCAAGCTCTTTAAGCCACAAGCGTTGCTGATGAGGTTTCATAACATCAGCAGGTAGAGAAGAATCCGGAGCCATACCACATGACAAACACCTAAGCCGGAAAGGGGGAGA	155
AGCGGCCGCGACTCTAGAGGTAACAACACGACTGGGCGTGTATAAACAAGACCACTAAGCCCAGTGCGTACTGCTTATGTCCCCTGACATAGGCGGTGGCTGGTAATATTCCGGAGCCATACCACATTGTTCCGATCTAAGCCGGAAAGGGGGAGA	156
AGCGGCCGCGACTCTAGAGGATTAAACACGACTGGGCGTGTATAAAGAGACCACTAAGCTCAGTGCGTACTGCTTATGTTACATAACATAGGCGGTGGCTGGTAAATATCCGGAGCCATACCACATAGCATTCCACTAAGCCGGAAAGGGGGAGA	155
AGCGGCCGCGACTCTAGAGGCACATACTCATCACATCGAGTCTAAAAGTCATTTAAGCTGTGAGCGTTGGGAGGTCACACTCCCATGTATGAACAAATCCGGAGCCATACCACATCTCTCAGGTCTAAGCCGGAAAGGGGGAGA	144
AGCGGCCGCGACTCTAGAGGAGCTAGCTCTTCTGGAAGAGTCTAAACAGCCTTAGGTCCAGAGCGGTACCAGGGAGCAATCCCTGGTACGTGGTAGCGGCTCCGGAGCCATACCACATCGGCTTTATCTAAGCCGGAAAGGGGGAGA	147
AGCGGCCGCGACTCTAGAGGAATAAAGTGGTCTGAGCCACTATAAACCCTTTTAAGCTCAGAGCGTCTTGTAGTTAATACTACAGGGGTAAGAGGTTGTCCGGAGCCATACCACATTAAGGGTGTCTAAGCCGGAAAGGGGGAGA	145
AGCGGCCGCGACTCTAGAGGAGCTAAGACGTTTGGGCGTCGTTAAATAGCAGGTTAGGCCCAAAGCGTGGGAGCCAGACGGCTCCCGGTCCTGAAAAGTCCGGAGCCATACCACATCCCAGATAGCTAAGCCGGAAAGGGGGAGA	145
AGCGGCCGCGACTCTAGAGGAGCTAAGACGTTTGGGCGTCGTTAAATAGCAGGTTAGGCCCAAAGCGTGGGAGCCAGATGGCTCCCGGTCCTGAAAAGTCCGGAGCCATACCACATCGGTTTACACTAAGCCGGAAAGGGGGAGA	145
AGCGGCCGCGACTCTAGAGGCCCCAAGTCAGCACAGTGACTATAAACCGCCTTAAGCTGTGCGCGTTCTAACAAAAAGTTAGAGGTGGCGTGCAGTCCGGAGCCATACCACATACCATCGGACTAAGCCGGAAAGGGGGAGA	142
AGCGGCCGCGACTCTAGAGGAAGCACGTCGTCCTGGCGACGGAAAACAGCCATTAGGCCAGGAGCGGTGCGGGAGATGTGATCTCTCGCACGTTGGACGCCCTCCGGAGCCATACCACATCGACACTATCTAAGCCGGAAAGGGGGAGA	149
AGCGGCCGCGACTCTAGAGGAAGCACGTCGTCCTGGCGACAGAAAACAGCCATTAGGCCAGGAGCGGTGCGGGAGATGTGATCTCTCGCACGTTGGAAGCCCTCCGGAGCCATACCACATCGTGTTCTACTAAGCCGGAAAGGGGGAGA	149
AGCGGCCGCGACTCTAGAGGCTAACACTCGACTAGACGAGTATAAACAGGCATTAGGTCTAGTGCGCCTCTACACGCCATTTTGCTGTAGAGGGTTGTTATCATTCCGGAGCCATACCACATTAAGGCACCCTAAGCCGGAAAGGGGGAGA	151
AGCGGCCGCGACTCTAGAGGTTAATAGTCGTTTGGGCGACTTAAAATAGCTGATTTAGCCCAAAGCGTTCTCAGAGGTAAAACTCTGAGATGTTCAGACAACTCCGGAGCCATACCACATGGATCAGTGCTAAGCCGGAAAGGGGGAGA	149
AGCGGCCGCGACTCTAGAGGAATAAACTGGTTCGAGCCAGTAAAAAAAGGCCGATAAGCTCGAAGCGTTCCACTCTTAGAGTGGAGGAGGCAAGACTCCGGAGCCATACCACATGTAGGCTATCTAAGCCGGAAAGGGGGAGA	143
AGCGGCCGCGACTCTAGAGGTGAATAGTCGTGCCAGCGACATTAAATAGGCCATTAGGCTGGCAGCCGTCCCGGAGTAACTGGCCGGGGATTGGCATCACTCCGGAGCCATACCACATAGCTCGTCACTAAGCCGGAAAGGGGGAGA	147
AGCGGCCGCGACTCTAGAGGAGTTATCTCGACAGGGCGAGACTAAAGAGACCATTAAGCCCTGAGCGGTCTGCGGATTTTGCGGACGTTGGTAACTTTCCGGAGCCATACCACATTCTAGACTGCTAAGCCGGAAAGGGGGAGA	144
AGCGGCCGCGACTCTAGAGGAGCACGTTCGTCTGGGCGAACAGAAACAGCCATTAGGCCCAGAGCGGTGTAGGGGCCGGTGTCCCTGCACATTGGATTTTCTCCGGAGCCATACCACATCTTGGAAGTCTAAGCCGGAAAGGGGGAGA	148
AGCGGCCGCGACTCTAGAGGAATCAAGCCGACTGGGCGGCTATAAACAGGCTTCAGGCCCAGAGCGTCAGATGCCGGAAGGCATCTGGGTAGCAGAAAGTCCGGAGCCATACCACATAATGCTCCGCTAAGCCGGAAAGGGGGAGA	146
AGCGGCCGCGACTCTAGAGGCTTCTGCCCGTCACGGCGGCATAAAAATAGCGCATTAGGCCGTGAGCGTTTCCCCTTCTGCCCTGCGCAGCCGGGGAAGGTTGCGAAAAATCCGGAGCCATACCACATTTCGTGTTGCTAAGCCGGAAAGGGGGAGA	157
AGCGGCCGCGACTCTAGAGGAGCGAAGTCGTTACAGCGACTATAAATAGGGTAATAGGCTGTAAGCGGTTCGTAACGTAATCATCATATGGATGAGCGTTACGGACGAACCACTAAATCCGGAGCCATACCACATCTACATGCCCTAAGCCGGAAAGGGGGAGA	164
AGCGGCCGCGACTCTAGAGGCTGAAACTCGTTTGAGCGAGTATAAATAGCTGCTTAGGCTCAAAGCGTATAAAGATTAATTTCTTTATCTGTGCAGGCGCTTCCGGAGCCATACCACATTTTCAAGCCCTAAGCCGGAAAGGGGGAGA	148
AGCGGCCGCGACTCTAGAGGTATAAAGTTGTTCCGGCAACTATAAACAGGATTTTAAGCCGGAAGCGTTCAGGCGGTGCAATAGTGCCGCTTGAGGTAATCAAACATCCGGAGCCATACCACATATTTGGCGACTAAGCCGGAAAGGGGGAGA	153
AGCGGCCGCGACTCTAGAGGTAAGAAGTTGTTTCGGCAACTATAAACAGGATTTTAAGCCGGAAGCGTTCAGGCGGTGCAATAGTGCCGCTTGAGGTAATCAAACATCCGGAGCCATACCACATAGATGTCGACTAAGCCGGAAAGGGGGAGA	153
AGCGGCCGCGACTCTAGAGGGGAGTGCTCGGTGCGGCGAGCCTAAATAGTGCCTTAGGCCGCACGCGTTATGCATAGGTGGCATAAATTCCGGAGCCATACCACATAGTCAGCTACTAAGCCGGAAAGGGGGAGA	135
AGCGGCCGCGACTCTAGAGGCTAGAAACCGTTAGAGCGGTTAAAAAAAGGTGTTAAGCTCTAAGCGTGGAGGGTTCGCCCTCCGGTCACATTAATTCCGGAGCCATACCACATCTATTGGGACTAAGCCGGAAAGGGGGAGA	142
AGCGGCCGCGACTCTAGAGGCCCAAAACCGTTAGAGCGGTTAAAAATAGGTGTTAGGCTCTAAGCGTGGAGGGTTCGCCCTCCGATCACATTAATTCCGGAGCCATACCACATGTATGAGGGCTAAGCCGGAAAGGGGGAGA	142
AGCGGCCGCGACTCTAGAGGTCTAAAACCGTTAGAGCGGTTAAAAATAGGTGTTAGGCTCTAAGCGTGGAGGGTTCGCCCTCCAGTCACATTAATTCCGGAGCCATACCACATGGTGCATATCTAAGCCGGAAAGGGGGAGA	142
AGCGGCCGCGACTCTAGAGGTCTAAAACCGTTAGAGCGGTTAAAAAAAGGTGTTAGGCTCTAAGCGTGGAGGGTTCGCCCTCCAGTCACATTAATTCCGGAGCCATACCACATCAATCCCTACTAAGCCGGAAAGGGGGAGA	142
AGCGGCCGCGACTCTAGAGGTCTAAAACCGTTAGAGCGGTTAAAAAAAGGTGTTAGGCTCTAAGCGTGGAGGATTCGTCCTCCAGTCACATTAATTCCGGAGCCATACCACATCCCATCTTACTAAGCCGGAAAGGGGGAGA	142
AGCGGCCGCGACTCTAGAGGCCCAAAACCGTTAGAGCGGTTAAAAATAGGTGTTAGGCTCTAAGCGTGGAGGATTCGTCCTCCAGTCACATTAATTCCGGAGCCATACCACATAGTGCAGTCCTAAGCCGGAAAGGGGGAGA	142
AGCGGCCGCGACTCTAGAGGACTTAACTCGATTGCGCGAGTATAAAAAGACGATTAAGCGTAAAGCGTTACCCGGATTGTTTGTCCGGGTAGGTTCAGTAAATTCCGGAGCCATACCACATGATTCGTCTCTAAGCCGGAAAGGGGGAGA	150
AGCGGCCGCGACTCTAGAGGAGAAAACAGGTTTCAGCCTGTATAAATAGGTTATTAAGCTGCAAGCGTTTGCACCTTTAACAGGGTGCAAGGTTAACTAAAATCCGGAGCCATACCACATGCCAAAGTCCTAAGCCGGAAAGGGGGAGA	149
AGCGGCCGCGACTCTAGAGGAGAAAACAGGTTTCAGCCTGTATAAATAGGTTATTAAGCTGAAAGCGTTTGCACCTTTAACAGGGTGCAAGGTTAACTAAAATCCGGAGCCATACCACATTAGGTCATGCTAAGCCGGAAAGGGGGAGA	149
AGCGGCCGCGACTCTAGAGGATTAAACAGGTTGCAGCCTGTATAAATAGGTTATTAAGCTGCAAGCGTTTGCACCTGTAATAGGGTGCAAGGTTAATAAAATTCCGGAGCCATACCACATCGATAAGGACTAAGCCGGAAAGGGGGAGA	149
AGCGGCCGCGACTCTAGAGGTAAAAACAGGTTGCAGCCTGTATAAATAGGTTATTAAGCTGCAAGCGTTTGCACCTGTAATAAGGTGCAAGGTTAACTATTATCCGGAGCCATACCACATGATGGAACACTAAGCCGGAAAGGGGGAGA	149
AGCGGCCGCGACTCTAGAGGATTAAACAGGATGCAGCCTGTATAAATAGGTTATTAAGCTGCAAGCGTTTGCACCTGTAATAAGGTGCAAGGTTAACTATTATCCGGAGCCATACCACATGTGACTGATCTAAGCCGGAAAGGGGGAGA	149
AGCGGCCGCGACTCTAGAGGATTAAACAGGTTGTAGCCTGTATAAATAGGTTATTAAGCTGCAAGCGTTTGCACCTGTAATAAGGTGCAAGGTTAACTATTATCCGGAGCCATACCACATGTCCTACAACTAAGCCGGAAAGGGGGAGA	149
AGCGGCCGCGACTCTAGAGGTAAAAACAGGTTGCAGCCTGTATAAATAGGTTATTAAGCTGCAAGCGTATCAATTCCTTCGGGAATTGGTGATTAACTTAAATCCGGAGCCATACCACATTAGGTGCGACTAAGCCGGAAAGGGGGAGA	149
AGCGGCCGCGACTCTAGAGGGTAAAACAGGTTGTAGCCTGTATAAATAGGTTATTAAGCTGCAAGCGTATCAATTCCTTCGGGAATTGGTGGTTAACTAATATCCGGAGCCATACCACATCCGTAGCTTCTAAGCCGGAAAGGGGGAGA	149
AGCGGCCGCGACTCTAGAGGGTAAAACAGGTTGCAGCCTGTATAAATAGGTTATTAAGCTGCAAGCGTATCAATTCCTTCGGGAATTGGTGGTTAACTAATATCCGGAGCCATACCACATTTACACGTCCTAAGCCGGAAAGGGGGAGA	149
AGCGGCCGCGACTCTAGAGGAGATAACAGGTTGTAGCCTGTATAAATAGGTTATTAAGCTACAAGCGTATCAATCCCTTCAGGGATTGGTGGTTAACTAATATCCGGAGCCATACCACATCTAGACGTACTAAGCCGGAAAGGGGGAGA	149
AGCGGCCGCGACTCTAGAGGATTAAACAGGTTGCAGCCTGTATAAATAGGTTATTAAGCTACAAGCGTATCAATCCCTTCGGGGATTGGTGGTTAACTAATATCCGGAGCCATACCACATTCGCACAACCTAAGCCGGAAAGGGGGAGA	149
AGCGGCCGCGACTCTAGAGGCTATAACAGGTTGTAGCCTGTATAAATAGGTTATTAAGCTACAAGCGTATCAATCCCTTCGGGGATTGGTGGTTAACTAATATCCGGAGCCATACCACATGGCACATAGCTAAGCCGGAAAGGGGGAGA	149
AGCGGCCGCGACTCTAGAGGAGATAACAGGTTTCAGCCTGTATAAATAGGTTATTAAGCTGAAAGCGTATCAATCCCTTCGGGGATTGGTGGTTAACTTAAATCCGGAGCCATACCACATTCTGCAGAACTAAGCCGGAAAGGGGGAGA	149
AGCGGCCGCGACTCTAGAGGCCTGTAGTCGACTGGGCGACTTATAAACAGCCGTTAGGCCCGGTGCGTCCGATGAAGCAACTGCTTCGCCGGGGTCGAACAACTTCCGGAGCCATACCACATGAAGTTACGCTAAGCCGGAAAGGGGGAGA	151
AGCGGCCGCGACTCTAGAGGTATAAAGCCGTCCCAACGGCTCTAAAAAGTCCATTAAGTTGGGAGCGTCCGGCAGAAATGCCGGGGTTGGAACAAATCCGGAGCCATACCACATAGATCCTCCCTAAGCCGGAAAGGGGGAGA	143
AGCGGCCGCGACTCTAGAGGTAAAAAGTTGTCCGAGCAGCTATAAACAGTCCATTAAGCTCGGAGCGTTTGGCAGTCTGAGTAAGGCTGTCAAGGTTGGAAAAATTCCGGAGCCATACCACATGCTGTGTTTCTAAGCCGGAAAGGGGGAGA	152
AGCGGCCGCGACTCTAGAGGCTAAAAGCTGACTCGGCAGCTATAAACAGCCATTAAGCCGAGAGCGTTTGGCAGTCTGAAATAAGGTTGCCAAGGTTGGAAAATATCCGGAGCCATACCACATTCTCCAAAGCTAAGCCGGAAAGGGGGAGA	152
AGCGGCCGCGACTCTAGAGGAACACTCTCGACTGAGCGAGTATAAATAGGCATCAAGCTCAGTGCGTCAGCTCGTATCACCCTACGAGCTGGGTTGCAAACAATCCGGAGCCATACCACATCCATCTGCTCTAAGCCGGAAAGGGGGAGA	150
AGCGGCCGCGACTCTAGAGGAGGTAAGCCGTCTGGGCGGCTCTAAATAGGTTTTAAGCCCCTAGCGTTCCTCTTTGGAGGAGGTAATAAACTATCCGGAGCCATACCACATATGACCCTCCTAAGCCGGAAAGGGGGAGA	140
AGCGGCCGCGACTCTAGAGGTAACAAGTGGTTGCGATCACTATAAATAGGGCTTTAAGTCGCAAGCGTCCTACCCTTTAGCGGGTAGGGGTAGTCAAACATCCGGAGCCATACCACATCGGTACTATCTAAGCCGGAAAGGGGGAGA	147
AGCGGCCGCGACTCTAGAGGGTAAAGGTCGACCGGGCGACCTAAAAAAAGCCGTTTGGCCCGGTGCGGGCCCGCCCTCGTGGCGGGTGTCGGAAATCGTCCGGAGCCATACCACATAGCATGCGACTAAGCCGGAAAGGGGGAGA	145
AGCGGCCGCGACTCTAGAGGTGGATAATCGACCAGGCGATTTAAAAAAGCGGTTAGGCCTGGTGCGGCGGTCCCTTGGGGCCGCGTCCAAACTATTCCGGAGCCATACCACATTCCAGATCACTAAGCCGGAAAGGGGGAGA	142
AGCGGCCGCGACTCTAGAGGATAATGGTCGTTCGGGCGACTTAAAACAGAACTTTAAGCCCGAAGCGTTGAGGGTGAAAACCCTCAGGAGTATAAATTCCGGAGCCATACCACATCTTGTCAGCCTAAGCCGGAAAGGGGGAGA	144
AGCGGCCGCGACTCTAGAGGTATACGCTCGTCCCGGCGAGCATAAACAGCCGTTAGGCCGGGAGCGGCGGCGCGTACGTGCGCCGCGTCGGGTTTCGTCCGGAGCCATACCACATTACGTAGGGCTAAGCCGGAAAGGGGGAGA	144
AGCGGCCGCGACTCTAGAGGACAACAGTCGTCTGAGCGACTCTAAATAGCCTCTTAGGCTCAGAGCGTTAGGCCGCTAAGAGACCGGATATCCGGAGCCATACCACATCCTTTCGATCTAAGCCGGAAAGGGGGAGA	137
AGCGGCCGCGACTCTAGAGGGATCAACTGGTTGCGGCCAGTATAAATAGTCTTTAAGCCGCAAGCGTGTCCTGGAGTTAATCTTCCAGGGCGGTAGCAATAATTCCGGAGCCATACCACATCAGAGTGCTCTAAGCCGGAAAGGGGGAGA	150
AGCGGCCGCGACTCTAGAGGAAAAAACAGGTTTCAGCCTGTATAAATAGTCTTTAAGCTGAAAGCGTTGAAAGGGTTTTTATTAACCCTTTCAGGTAGAAAAATCTCCGGAGCCATACCACATGGAGTCTTGCTAAGCCGGAAAGGGGGAGA	152
AGCGGCCGCGACTCTAGAGGAAAAAACAGGTTTCAGCCTGTATAAATAGCCTTTAAGCTGAAAGCGTTGAAAGGGTTTTGATTAACCCTTTCAGGTAGAAAAAATTCCGGAGCCATACCACATACCTACAACCTAAGCCGGAAAGGGGGAGA	152
AGCGGCCGCGACTCTAGAGGCAGCAACTCGACCGTGCGAGTATAAATAGTGTGCTTAGGCACGGTGCGGCAAGAATAATCTTGTATGCACGACTCTCCGGAGCCATACCACATGATCCGGTACTAAGCCGGAAAGGGGGAGA	142
AGCGGCCGCGACTCTAGAGGTATAGAATCGACTAGGCGATTTAAAACAGGTGTTAAGCCTAGTGCGGTAAGAGGTATCCCCTCTTACGTCACGTGAGATCCGGAGCCATACCACATTTCCGTTCGCTAAGCCGGAAAGGGGGAGA	145
AGCGGCCGCGACTCTAGAGGTGTACAATCGACTAGGCGATTTTAAATAGGTGTTAAGCCTAGTGCGGTAAGAGGTATAACCCTCTTGCGTCACGTGAGATCCGGAGCCATACCACATAGTGAATCCCTAAGCCGGAAAGGGGGAGA	146
AGCGGCCGCGACTCTAGAGGGTAACATTCGACTAGACGAGTATAAATAGGTGTCAGGTCTAGTGCGGCAGGGTTCTTCCCTGCATCATAAAGGATCCGGAGCCATACCACATAGTCTGGTACTAAGCCGGAAAGGGGGAGA	141
AGCGGCCGCGACTCTAGAGGTCAAAAATCGACTAGACGATAAAAAACAGGTGTTAGGTCTAGTGCGGCAGGGTTCTTCCCTGCGTCACATATGATCCGGAGCCATACCACATAAGAGGATCCTAAGCCGGAAAGGGGGAGA	141
AGCGGCCGCGACTCTAGAGGTTAATGATCGACTAGACGATTAAAAACAGGTGTTAGGTCTAGTGCGGCAGGGTTCTTCCCTGCGTCACATATGATCCGGAGCCATACCACATCTTCTTGAGCTAAGCCGGAAAGGGGGAGA	141
AGCGGCCGCGACTCTAGAGGTCAAAAATCGACTAGGCGATTTAAAATAGGTGTTAAGCCTAGTGCGGCAGGGTTCTTCCCTGCATCACAAAAAGTCCGGAGCCATACCACATGTTTAGCGTCTAAGCCGGAAAGGGGGAGA	141
AGCGGCCGCGACTCTAGAGGAGCAAACTCGATCAGACGAGTATAAACAGGTGTTAGGTCTGATGCGTGGGGGCTTTCTGCCCCCGGTCACAGAAGATCCGGAGCCATACCACATCTGTCCTGACTAAGCCGGAAAGGGGGAGA	143
AGCGGCCGCGACTCTAGAGGACACAACTGGACTATGCCAGTATAAATAGCATTTAGGCATAGTGCGGCGGGATAACTCCCGCGTATGAAGTTCTCCGGAGCCATACCACATAGCTGAACGCTAAGCCGGAAAGGGGGAGA	140
AGCGGCCGCGACTCTAGAGGGACAAACTGGACTATGCCAGTATAAATAGATTTTAGGCATAGTGCGGCGGGATTCGTCCCGCGTAATACTGTGTCCGGAGCCATACCACATCGCATTTGACTAAGCCGGAAAGGGGGAGA	140
AGCGGCCGCGACTCTAGAGGACAACTCTCGACCGAGCGAGTCAAAACAGGTCTTAGGCTCGGTGCGTCACCGCTCACCACGAGCGGTGGGTGACTATTTTTCCGGAGCCATACCACATAAGCAATGCCTAAGCCGGAAAGGGGGAGA	147
AGCGGCCGCGACTCTAGAGGAACCAGCTCGTTACAGCGAGTATAAACCGCATTAAGCTGTAAGCGTTCAGGGTTCACGCCCTGAGGTTGTATAACCTCCGGAGCCATACCACATGGTGTAGCACTAAGCCGGAAAGGGGGAGA	143
AGCGGCCGCGACTCTAGAGGAACCAACTCGTTACAGCGAGTATAAACCGCATTAAGCTGTAAGCGTCCGGGAACAAATCCCGGGGTTGTATTAACTCCGGAGCCATACCACATTTCGAACAGCTAAGCCGGAAAGGGGGAGA	142
AGCGGCCGCGACTCTAGAGGTCATAAGTGGACTATGCCACTCTAAACCACATTAAGCATAGAGCGTAGAGAGAGTGTTTAAACATTCTCTCTGGTTGTATAACTTCCGGAGCCATACCACATAACTGCTGACTAAGCCGGAAAGGGGGAGA	151
AGCGGCCGCGACTCTAGAGGATTCAAGTGGTCTGCACCACTATAAAAAGACATTAAGTGCAGAGCGTAGAGAGAGTGTTTAAACATTCTCTCTGGTTGTTTAACTTCCGGAGCCATACCACATGTGGGTTTGCTAAGCCGGAAAGGGGGAGA	152
AGCGGCCGCGACTCTAGAGGAAGCACGTCGGCGTGGCGACGGTAAAAAGGGCATTAAGCCACGAGCGTTGTCAGAAGACAGGTTGCCACTTATCCGGAGCCATACCACATACCAACGCACTAAGCCGGAAAGGGGGAGA	139
AGCGGCCGCGACTCTAGAGGCGTCAAGTCGGTTGGGCGACTATAAAGAGATGAATAAGCCCAACGCGTTTGCCAGATGGCAAGGACATATGGTGTCCGGAGCCATACCACATGTACAGTCTCTAAGCCGGAAAGGGGGAGA	141
AGCGGCCGCGACTCTAGAGGAGTACAGTCGTTTGGGCGACTATAAACAGACGAATAAGCCCAAAGCGTTTCCTCGTAAGAGGAAGGACGGACCCGCTCCGGAGCCATACCACATCAGTTACTCCTAAGCCGGAAAGGGGGAGA	143
AGCGGCCGCGACTCTAGAGGAGTACAGTCGTTTGGGCGACTATAAATAGACGAATAAGCCCAAAGCGTTTCCTCGTAAGAGGAAGGACGGTCCCTGTCCGGAGCCATACCACATCCAACAAGACTAAGCCGGAAAGGGGGAGA	143
AGCGGCCGCGACTCTAGAGGTAAAAACAGGTTTGCGCCTGTCTAAATAGGTATTAAGCGCAAAGCGGTGCGAAAGTGTTTAAACACACTTTTGTGCGTTACAAACTTTCCGGAGCCATACCACATGAACGTTTGCTAAGCCGGAAAGGGGGAGA	154
AGCGGCCGCGACTCTAGAGGTAAAAACAGGTTTGCGCCTGTATAAATAGGTATTAAGCGCAAAGCGGTGCGGATGTGTTTAAACACATTTGCGCGTTACAAACTTTCCGGAGCCATACCACATATATGGGAGCTAAGCCGGAAAGGGGGAGA	152
AGCGGCCGCGACTCTAGAGGTAAAAACAGGTCTGAACCTGTATAAATAGTGTATTAAGTTCAGAGCGGTGCGAAAGTGTTTAAACACTTTTGTGCGTTACAAACTTTCCGGAGCCATACCACATAGGTTTGCCCTAAGCCGGAAAGGGGGAGA	153
AGCGGCCGCGACTCTAGAGGTAATAACAGGTTTGCGCCTGTATAAATAGACATTAAGCGCAAAGCGTCCCGCAATTGTTGCGGGGGTTGTATAACTTCCGGAGCCATACCACATCCCAAAGAGCTAAGCCGGAAAGGGGGAGA	143
AGCGGCCGCGACTCTAGAGGTACAGAGCCGTCAAGCCGGCTATAAACAGTCCATTAAGACTTGAGCGTTCGCCTGCCGTTGTGGTGGGCGAGGTTGGAAACAATCCGGAGCCATACCACATTAAGGTCTCCTAAGCCGGAAAGGGGGAGA	150
AGCGGCCGCGACTCTAGAGGTGTGAAGTCGTCTGAGCGACTATAAATAGTATTTAAGCTCAGAGCGTTAAGGGGCTAGAGTAAGGAGTGGATGCCAAGCTCTAGTCCCTTAGGTATGCTGTGATCCGGAGCCATACCACATGGGACTAGACTAAGCCGGAAAGGGGGAGA	170
AGCGGCCGCGACTCTAGAGGTATAAAGACGTTGCAACGTCTCAAAATAGCCCTTTAGGTTGCAAGCGTGGGACGGTAGCAAGCCGCCCCGGTAGGGTAAAATCCGGAGCCATACCACATCCGATGATACTAAGCCGGAAAGGGGGAGA	148
AGCGGCCGCGACTCTAGAGGCAATTAGTCGGTAGAGCGACTTTAAAAAGGCATTAGGCTCTACGCGTTCCAGGAGGAAACTCCTGGAGGTTGTTTAACTTCCGGAGCCATACCACATATGTACGCACTAAGCCGGAAAGGGGGAGA	146
AGCGGCCGCGACTCTAGAGGCAATAACAGGTCATAGCCTGTCTAAATAGTCCATTAAGCTATGAGCGCTACAAGCCTATATAACAGGCTTGTAAGTTGGAACACATCCGGAGCCATACCACATCTCCGTAGTCTAAGCCGGAAAGGGGGAGA	152
AGCGGCCGCGACTCTAGAGGCAATAACAGGTCATAGCCTGTCTAAACAGTCCATTAAGCTATGAGCGCTACAAGCCTATATAACAGGCTTGTAAGTTGGAACACATCCGGAGCCATACCACATAACCACACTCTAAGCCGGAAAGGGGGAGA	152
AGCGGCCGCGACTCTAGAGGGCATAACAGGTCATAGCCTGTCTAAACAGTCCTTTAAGCTATGAGCGTTGCAAGTCTATAACAGGCTTGCAGGTTGGAACAAATCCGGAGCCATACCACATACACACCGACTAAGCCGGAAAGGGGGAGA	150
AGCGGCCGCGACTCTAGAGGATCTAGCTCCTCAGGGGGAGAATAAACCGCATTAAGCCCTGAGCGTTCCTGCTTATGCAGGAGGTTGTTAGTATTCCGGAGCCATACCACATTTACGCTCGCTAAGCCGGAAAGGGGGAGA	141
AGCGGCCGCGACTCTAGAGGTAAACACTCGGCTAGGCGAGTATAAACAGACATCAAGCCTAGCGCGTCTATCCCATTCCAAATGGGGTAGGGTTGTACAAACTCCGGAGCCATACCACATGTGTGAAAGCTAAGCCGGAAAGGGGGAGA	149
AGCGGCCGCGACTCTAGAGGAGTAAACTTGTATCGGCAAGTATAAAAAGACATTAAGCCGATAGCGTCCACTCTGTTTAAACAGGGTGGGGTTGTATAACTTCCGGAGCCATACCACATCTCGAAAGTCTAAGCCGGAAAGGGGGAGA	148
AGCGGCCGCGACTCTAGAGGTTTAAACTTGTATCGGCAAGTATAAAAAGACATTAAGCCGATAGCGTCCACTCTGTTTAAACGGGGTGGGGTTGTATAACTTCCGGAGCCATACCACATCTAGCTGAACTAAGCCGGAAAGGGGGAGA	148
AGCGGCCGCGACTCTAGAGGAAATTACTCGACCGAGCGAGTATAAATAGCCATTAGGCTCGGTGCGTCTATCCCTCACACCACGAGGGATAGGGTTGAAGAAAATCCGGAGCCATACCACATCGAACACTTCTAAGCCGGAAAGGGGGAGA	151
AGCGGCCGCGACTCTAGAGGATAACAGCCGTCCAGGCGGCTATAAATAGGCATTAAGCCTGGAGCGTTTACGGGGTATTGCCCCGTAAGGTTGCAAAAATTCCGGAGCCATACCACATTCACAGGAACTAAGCCGGAAAGGGGGAGA	147
AGCGGCCGCGACTCTAGAGGTAGTAAGCCGTCCAGGCGGCTATAAACAGTGCATTAAGCCTGGAGCGTTTACGGGGGGGTAATACCCCGTAAGGTTGCAAAAATTCCGGAGCCATACCACATGTTTGCTGACTAAGCCGGAAAGGGGGAGA	151
AGCGGCCGCGACTCTAGAGGATAACAGCCGTCCAGGCGGCTATAAATAGGCATTAAGCCTGGAGCGTTTACGGGGCAATACCCCGTAAGGTTGCAAAAAATCCGGAGCCATACCACATCCCCTACAACTAAGCCGGAAAGGGGGAGA	147
AGCGGCCGCGACTCTAGAGGCAATAAGCCGACTATGCGGCTATAAATAGGCATTAGGCATAGTGCGTCTGTCCGTCATGTAAGTGACGGGCAGGGTTGTATTGAATCCGGAGCCATACCACATAATTGCGAGCTAAGCCGGAAAGGGGGAGA	152
AGCGGCCGCGACTCTAGAGGACAAGCGTCGATTCGACGACGGTAAACAGGGCATTAGGCCGCAAGTGTGGGCGGGAATCCGCCCGGTTGCCGGGAGTCCGGAGCCATACCACATATAACCGGTCTAAGCCGGAAAGGGGGAGA	143
AGCGGCCGCGACTCTAGAGGCGCTGACCCGTTCCGGCGGGTATAAACAGGGCATTAGGCCGGAAGCGTGGGCGAGATTTCGCCCAGTTGTCGAAAATCCGGAGCCATACCACATGACAATAGGCTAAGCCGGAAAGGGGGAGA	143
AGCGGCCGCGACTCTAGAGGTGAAAAGCCGACTGAGCGGCTATAAAAAGGCGTTAGGCTCAGTGCGTGGGGCCCTTCGGGGTCCCGGTCGCATTACGTCCGGAGCCATACCACATCCGTAACTACTAAGCCGGAAAGGGGGAGA	144
AGCGGCCGCGACTCTAGAGGGGTTAACTCGACTAAGCGAGTATAAAAAGAACTTAAGCTTAGTGCGTCTCCTGGATTCACCAGGGGGGTGAATTTTTATCCGGAGCCATACCACATACATCCGTACTAAGCCGGAAAGGGGGAGA	145
AGCGGCCGCGACTCTAGAGGAAGAAAATCGTTTGAGCGATTCAAAACCACATTAGGCTCAAAGCGTCCGAGTTGTTTAAACGACTCGGGGTTGTATAACTTCCGGAGCCATACCACATTCTCTGCCACTAAGCCGGAAAGGGGGAGA	147
AGCGGCCGCGACTCTAGAGGGAGAATGTGGACTACGCCACAATAAATAGACATTAAAGCGTAGAGCGTCCGAGTTGTTTAAACGACTCGGGGGTTGTATAACTCCGGAGCCATACCACATTTTCGACCCCTAAGCCGGAAAGGGGGAGA	149
AGCGGCCGCGACTCTAGAGGAGAATGGTGGATTACGCCACAATAAATAGACATTAAGCGTAAAGCGTCCGAGTTGTTTAAACGACTCGGGGTTGTATAACTTCCGGAGCCATACCACATAGAAGCTGACTAAGCCGGAAAGGGGGAGA	148
AGCGGCCGCGACTCTAGAGGAAAAAAGTAGTCATGGCTACTATAAATAGAGACTTAAGCCATGAGCGTTCCCATCTTTGTGATGGGAGGTGTCTTTCCGTCCGGAGCCATACCACATTCAACAGGACTAAGCCGGAAAGGGGGAGA	146
AGCGGCCGCGACTCTAGAGGCAATGACTCGTCTGAGCGAGGTAAAATTAGCTCATTAGGCTCAGAGCGTCAGCCTGTAGAAAATTGCAGGCTGGGTTGAGAATTTTCCGGAGCCATACCACATGCACGATAACTAAGCCGGAAAGGGGGAGA	152
AGCGGCCGCGACTCTAGAGGGACCAAGTCGACTAAGCGACTCTAAACAGCATTTAGGCTTAGTGCGTTCCCCTGCTCACGCGGGGGAGGTATGGAGTCCTCCGGAGCCATACCACATAGAAGGTCGCTAAGCCGGAAAGGGGGAGA	146
AGCGGCCGCGACTCTAGAGGGCCCTCCAGGTTTGGGCCTGGCTAAATAGATAATTAAGCCCAAAGCGTCCCCACCCTGGTGGGGGGTTTATAAACTTCCGGAGCCATACCACATTACGTCCATCTAAGCCGGAAAGGGGGAGA	143
AGCGGCCGCGACTCTAGAGGCACATAATCGTTAGGGCGATTTAAAAGAGAGTATTAAGCCCTAAGCGTCCCGACTTTGTCGGGGGTTACAAACTTTCCGGAGCCATACCACATGTAAATCCCCTAAGCCGGAAAGGGGGAGA	142
AGCGGCCGCGACTCTAGAGGTAAAAAATCGTTAGGGCGATTTAAAAAAGTGTATTAAGCCCTAAGCGTCCCGACTTTGTCGGGGGTTACAAACTTTCCGGAGCCATACCACATAGAGGCTACCTAAGCCGGAAAGGGGGAGA	142
AGCGGCCGCGACTCTAGAGGTTAAAAATCGTATCGGCGATTTAAAAAAGTGTATTAAGCCGATAGCGTCCCGACTTAGTCGGGGGTTACAAACTTTCCGGAGCCATACCACATGGAATCGTCCTAAGCCGGAAAGGGGGAGA	142
AGCGGCCGCGACTCTAGAGGAATACACTCGTTAGGCGAGTATAAATAGACTATTAAGCCCTAAGCGTCCCCAGTGTATTAGCTGGGGGGATAGAACAAGTCCGGAGCCATACCACATAGAAGTGACCTAAGCCGGAAAGGGGGAGA	146
AGCGGCCGCGACTCTAGAGGGCGAGGCACGACTATGCGTGCATAAATAGACGTTAGGCATAGTGCGTTAATAGGGCGTAGTGTGCGCAGGCATATTGCACCCTTTTAGGTCGTATTAATTCCGGAGCCATACCACATAGATGAGCACTAAGCCGGAAAGGGGGAGA	166
AGCGGCCGCGACTCTAGAGGCTGGGACTCGACTATGTGAGGATAAATAGACACTAAGCATAGTGCGTTTGTATAACGGAAGCCGCTAGCAATAGCAGTGAAAGTTATATGAGGCTGTTGGGAGTCCGGAGCCATACCACATCGTTTGTACCTAAGCCGGAAAGGGGGAGA	170
AGCGGCCGCGACTCTAGAGGCTGGGACTCGACTATGCGAGGATAAATAGACACTAAGCATAGTGCGTTTGTATGACAGAAGCCGCTAGCAATAGCAGTGAAGGTTATATGAGGCTGTTGGGAGTCCGGAGCCATACCACATGATGGCCTACTAAGCCGGAAAGGGGGAGA	170
AGCGGCCGCGACTCTAGAGGTTCTAACTCGACTTCGCGAGTATAAATAGGCTTTAGGCGGAGAGCGGTAGGTAGACTATTCTACCTACGTAGTGTAAAATCCGGAGCCATACCACATACATCTCTGCTAAGCCGGAAAGGGGGAGA	146
AGCGGCCGCGACTCTAGAGGTTTTCAGTCGTCATGGCGACTATAAATAGACGTTTAAGCCATGAGCGTTACATAGAATGCAAATTTTATGTAGAGCGTAATTTTTCCGGAGCCATACCACATCTTGGTCGTCTAAGCCGGAAAGGGGGAGA	151
AGCGGCCGCGACTCTAGAGGTTTTCAGTCGTCATGGCGACTTTAAATAGACATTTAAGCCATGAGCGTTACATAAATTTTATTTTATGTAGGTTGTTGAAGCTCCGGAGCCATACCACATCATCTCAACCTAAGCCGGAAAGGGGGAGA	149
AGCGGCCGCGACTCTAGAGGAAGCAACTCGTTAGGGCGAGTATAAATAGAAGTTAAGCCCTAAGCGTTCACTCAACAAAGAGTGAGGTCTGGATAATTCCGGAGCCATACCACATAAGTCCCAACTAAGCCGGAAAGGGGGAGA	144
AGCGGCCGCGACTCTAGAGGAGTGAGCTCGACTAGGCGAGCCTAAATAGAACTTAAGCCTAGTGCGTCCGGGACTTCGGTTCCGGGGTGTGGGGGGATCCGGAGCCATACCACATGAATCCTTGCTAAGCCGGAAAGGGGGAGA	144
AGCGGCCGCGACTCTAGAGGTTCTTTGCCGACCGAGCGGCACAAAACAGGCATTAGGCTCGGTGCGTTCCTCCGCCACACCACAAGCGGAGGAGGTTGTATTAATTCCGGAGCCATACCACATATAGGATGCCTAAGCCGGAAAGGGGGAGA	152
AGCGGCCGCGACTCTAGAGGAATTATATCGGCTGCGGCGAGTATAAACAGCCCTTAAGCCCGGCGCGTGGCCACCGCAATGGTGGCCGGTGGGATGATGTCCGGAGCCATACCACATAGGGAGGATCTAAGCCGGAAAGGGGGAGA	146
AGCGGCCGCGACTCTAGAGGAATAAGCTCGTCATGGCGAGGATAAAAAGGACTTCAGGCCATGAGCGTTGATTGTTGGGACAGATCCTGACAATCAGGTAGTCGGCTATCCGGAGCCATACCACATCTTGCTGACCTAAGCCGGAAAGGGGGAGA	155
AGCGGCCGCGACTCTAGAGGCCCGCCGCCGTTGCGGCGGCGGTAAATAGGCGATTAAGCCGCAAGCGTGCCCGCCGTCGTGCGGGCGGTTCGCACATATCCGGAGCCATACCACATAGAGCTCAGCTAAGCCGGAAAGGGGGAGA	145
AGCGGCCGCGACTCTAGAGGTTAAAGCCGTTGCGGCGGCTATAAATAGGACATTAAGCCGCAAGCGTTGCCCGGTATACCGCCGGGCAGGTTGTCAAATATCCGGAGCCATACCACATGGTCTTGTTCTAAGCCGGAAAGGGGGAGA	147
AGCGGCCGCGACTCTAGAGGTTGCAAGCCGTTGCGGCGGCGTTAAATAGTGCATTAAGCCGCAAGCGTTCCCGTCTTAATTGGCGGGGGGTTGCAAGACATCCGGAGCCATACCACATTCACATCTCCTAAGCCGGAAAGGGGGAGA	147
AGCGGCCGCGACTCTAGAGGATTACAGTCGTGGCGGCGACGTTAAATAGGCATTAAGCCGCCAGCGTTCCCCTCACTGGGGAGGTTGCAACAGGTCCGGAGCCATACCACATTGCGATTGCCTAAGCCGGAAAGGGGGAGA	141
AGCGGCCGCGACTCTAGAGGATAACAGTCGTGGCGGCGACGTTAAATAGGCATTAAGCCGCCAGCGTTCCCCTCATTGGGGAGGTTGCAACAGATCCGGAGCCATACCACATTAGGAGCTACTAAGCCGGAAAGGGGGAGA	141
AGCGGCCGCGACTCTAGAGGATAACAGTCGTGGCGACGACGTTAAATAGGCATTAAGCCGCCAGCGTTCCCCTATTGGGGAGGTTGCAACAGGTCCGGAGCCATACCACATGCTCCTACTCTAAGCCGGAAAGGGGGAGA	140
AGCGGCCGCGACTCTAGAGGATAACAGTCGTGGCGGCGACGTTAAATAGGCATTAAGCCGCCAGCGTTCCCCACATTGGGGAGGTTGCAACAGGTCCGGAGCCATACCACATAGTGGGTCACTAAGCCGGAAAGGGGGAGA	141
AGCGGCCGCGACTCTAGAGGTAAACCACCGTGGCGGCGGTGTAAAACAAACATTAAGCCGCCAGCGTCCCGGAACAAGGCATTTTCCGATTCTCCGGGGGTTGCAGTTTATCCGGAGCCATACCACATAAGCAGATCCTAAGCCGGAAAGGGGGAGA	157
AGCGGCCGCGACTCTAGAGGCCTTCCGTCGTCTGAGCGACGTTTAAATAGAACTTAAGCTCAGAGCGTTCCCCACTCTAGGGTGGGGAGGTGGCGTTGAGTCCGGAGCCATACCACATCAGCCACATCTAAGCCGGAAAGGGGGAGA	147
AGCGGCCGCGACTCTAGAGGCATTCACTCGTCTGAGCGAGTATAAATAGGCTTTTGGCTCAGAGCGATTCCTGGAGCGCTGTTTCCAGGGATGTAGCAATAATTCCGGAGCCATACCACATCGAAATCGCCTAAGCCGGAAAGGGGGAGA	150
AGCGGCCGCGACTCTAGAGGTTAAATGTCGCCTGGGCGACTATAAACAGACATTAAGCCCAGAGCGTCCTTCCTGCTACGGGAAGGGGTTGTGAAAAATCCGGAGCCATACCACATCCAGCTTAACTAAGCCGGAAAGGGGGAGA	145
AGCGGCCGCGACTCTAGAGGACTAATCTCGTTTGAGCGAGAATAAAAAGACATTAAGCTCAAAGCGGCTTTGCCGGCAAACCGGCAAGGCGTTGTAAAAAATCCGGAGCCATACCACATATGCCAGAGCTAAGCCGGAAAGGGGGAGA	148
AGCGGCCGCGACTCTAGAGGTTAATACCCGTTGCGGCGGGTCTAAATAGGTGATTAGGCCGCAAGCGTCCCGCCCTCCGTGGGCGGGGGTTCACATTCATCCGGAGCCATACCACATAACGACCTACTAAGCCGGAAAGGGGGAGA	146
AGCGGCCGCGACTCTAGAGGCGTGAACCCGTGGCGGCGGGGATAAATAGCCAGTTAAGCCGCCAGCGCCCCGGCCTTGTGCCGGGAGTCTGGAAGAATCCGGAGCCATACCACATAAGGGCTATCTAAGCCGGAAAGGGGGAGA	144
AGCGGCCGCGACTCTAGAGGTTCTAACCCGTTGCGGCGGGTATAAATAGCCAGTTAGGCCGCAAGCGTCCCGGCATTGTGCCGGGGGTCTGGAAATCTCCGGAGCCATACCACATTCTGATGGGCTAAGCCGGAAAGGGGGAGA	144
AGCGGCCGCGACTCTAGAGGTCTAAACACGTTGCGCCGTGTATAAATAGCCGGTTAGGGCGCAAGCGTCCCGGCATTTTGCCGGGGGTCTGGAAAGTTCCGGAGCCATACCACATGTCTCTAGTCTAAGCCGGAAAGGGGGAGA	144
AGCGGCCGCGACTCTAGAGGTTTAAACACGTTGCGCCGTGTATAAATAGCCAGTTAGGGCGCAAGCGTCCCTGCATTTTGCCGGGGGTCTGGAAAGTTCCGGAGCCATACCACATAACTTGCCTCTAAGCCGGAAAGGGGGAGA	144
AGCGGCCGCGACTCTAGAGGCTAACACACGTTGCGCCGTGTATAAATAGCCAGTTAGGGCGCAAGCATCCCGGCATTTTGCCGGGGGTCTGGAAAGTTCCGGAGCCATACCACATGAATAGCTGCTAAGCCGGAAAGGGGGAGA	144
AGCGGCCGCGACTCTAGAGGTTAACACACGTTGCGCCGTGTATAAATAGCCAGTTAGGGCGCAAGCGTCCCGGCATTTTGCCGGGGGTCTGGAAAGTTCCGGAGCCATACCACATAATCAAGGCCTAAGCCGGAAAGGGGGAGA	144
AGCGGCCGCGACTCTAGAGGTTAACACACGTTGCGCCGTGTATAAATAGCCAGTTAGGGCGCAAGCGTCCCGGCTCTGCCGGGGGTCTGGAAAGTTCCGGAGCCATACCACATAACAGGGGTCTAAGCCGGAAAGGGGGAGA	142
AGCGGCCGCGACTCTAGAGGGTAACACACGTTGCGGCGTGTATAAATAGCCAGTCAAGCCGCAAGCGTCCCGGCTCTGCCGGGGGTCTGGAAACATCCGGAGCCATACCACATGTACCGTGACTAAGCCGGAAAGGGGGAGA	142
AGCGGCCGCGACTCTAGAGGTCATAACACGTTGCAACGTGTATAAATAGCCCTTTAGGTTGCAAGCGTCCATCCCTTCGGGGATGGGGTAGGGAAAACTCCGGAGCCATACCACATTCCTTCAGGCTAAGCCGGAAAGGGGGAGA	145
AGCGGCCGCGACTCTAGAGGGTAACACACGTTGCAACGTGTATAAATAGCCCTTTAGGTTGCAAGCGTCCCGCCCATGTGGCGGGGGTAGGGAATACTCCGGAGCCATACCACATCTGATTCGCCTAAGCCGGAAAGGGGGAGA	144
AGCGGCCGCGACTCTAGAGGTTCTAACCCGTGGCGGCGGGTATAAATAGCCAGTTAAGCCGCCAGCGCTCCCAGGGTGTAAAGCCCTGGGAAGTCTGGAAGAATCCGGAGCCATACCACATCATTCGGGACTAAGCCGGAAAGGGGGAGA	150
AGCGGCCGCGACTCTAGAGGAATTAAGTCGTTGCATCGACTATAAAAAGCCCGTTAGGATGCAAGCGTTCCGCCCATTGTGGGCGGAGGTCGGGAAAACTCCGGAGCCATACCACATCGCGATTGTCTAAGCCGGAAAGGGGGAGA	146
AGCGGCCGCGACTCTAGAGGAAATAAGTCGTTCGTGCGACTATAAATAGACCTTAGGCACGAAGCGGGGAGAGTAATCTCCCGTGGCAGCGTGTCCGGAGCCATACCACATCTCTGTCGTCTAAGCCGGAAAGGGGGAGA	140
AGCGGCCGCGACTCTAGAGGAATAAAGCCGTTCGGGCGGCTATAAACAGACCTCAGGCCCGAAGCGTGGCGGCACCTGCCGCCGGTGGTAAAAATTCCGGAGCCATACCACATAGAGGCTTACTAAGCCGGAAAGGGGGAGA	142
AGCGGCCGCGACTCTAGAGGTAAAAAGCCGTTCGGGCGGCTATAAACAGACCTCAGGCCCGAAGCGTGGCGGCACCTGCAGCCGGTGGTAAAAATTCCGGAGCCATACCACATTATCAGGCGCTAAGCCGGAAAGGGGGAGA	142
AGCGGCCGCGACTCTAGAGGAATAAAGCCGTTCGGGCGGCTATAAACAGACCTCAGGCCCGAAGCGGGGCGGCACCTGCCGCCGGTGGTAAAAATTCCGGAGCCATACCACATTCTCTGGGACTAAGCCGGAAAGGGGGAGA	142
AGCGGCCGCGACTCTAGAGGTGGCCAGCCGTTCGGGCGGCTATAAACAGACCTCAGGCCCGAAGCGTGGCGGCCCCTGCCGCCGGTGGTAAAAATTCCGGAGCCATACCACATTATCGGCTCCTAAGCCGGAAAGGGGGAGA	142
AGCGGCCGCGACTCTAGAGGTAAAAAGCCGTTCGGGCGGCTATAAACAGACCTCAGGCCCGAGGCGTGGCGGCCCCTGCCGCCGGTGGTAAAAATTCCGGAGCCATACCACATCTCTCCATGCTAAGCCGGAAAGGGGGAGA	142
AGCGGCCGCGACTCTAGAGGATTTTAGCCGTTCGGGCGACTATAAACAGGCCTTAGGCCCGAAGCGTGGCGGCACTTGCCGCCGGTGGTAAAAAATCCGGAGCCATACCACATAAGGAGGGTCTAAGCCGGAAAGGGGGAGA	142
AGCGGCCGCGACTCTAGAGGAATAAAGTCGTTCGGGCGACTATAAACAGGCCTTAGGCCCGAAGCGTGGCGGCAATCTGCCGCCGGTGGTACAAATTCCGGAGCCATACCACATTTGGAGCTCCTAAGCCGGAAAGGGGGAGA	143
AGCGGCCGCGACTCTAGAGGTATAAAGCCGTTCGGGCGGCTCAAAACAGACCTTAGGCCCGAAGCGTGGCGGCAACCTGCCACCGGTGGTGAAACTTCCGGAGCCATACCACATCAGCAAGCACTAAGCCGGAAAGGGGGAGA	143
AGCGGCCGCGACTCTAGAGGTATAAAGCCGTTCGGGCGGCTCAAAACAGACCTTAGGCCCGAAGCGTGGCGGCAACCTGCCGCCGGTGGTGAAACTTCCGGAGCCATACCACATGTCCTATGGCTAAGCCGGAAAGGGGGAGA	143
AGCGGCCGCGACTCTAGAGGTAAACAGTCGGTCGGGCGACTATAAACAGTCCTTAAGCGCGACGCGTTGCCAGAGTGATCTGGCAGGTGGAATTAATTCCGGAGCCATACCACATCCGATCTCTCTAAGCCGGAAAGGGGGAGA	144
AGCGGCCGCGACTCTAGAGGCCAAAACTCGGCTAGGCGAGTATAAATAGCCGTCAGGCCTAGCGCGTCCAAGCCTAGCCCCTTCTGGGGCTGGGCGAAGGGTCGGGAAAAATCCGGAGCCATACCACATAGCCTGTCACTAAGCCGGAAAGGGGGAGA	158
AGCGGCCGCGACTCTAGAGGTTAACAGTCGTCTGGACGACTAAAAAAAGACATTAGGTCCAGAGCGTTCCGATCATTATTGATCGGAGGTTGTAATATATCCGGAGCCATACCACATAGTGATGCTCTAAGCCGGAAAGGGGGAGA	146
AGCGGCCGCGACTCTAGAGGGAGGAACTCGACTGAGCGAGTATAAATAGTCCTTAGGCTCAGTGCGGCGCGCGGTCATCATGACGCGCGCGTGGAGGTAAATCCGGAGCCATACCACATTTTGCCTCTCTAAGCCGGAAAGGGGGAGA	148
AGCGGCCGCGACTCTAGAGGCGCTTGGTCGACTATGCGACCTTAAATAGCCTTTAGGCATAGTGCGTCACTATATGAGTGGGTATGGAAAAGTCCGGAGCCATACCACATCTGACGCATCTAAGCCGGAAAGGGGGAGA	139
AGCGGCCGCGACTCTAGAGGAACAAACTCGTTAGGGCGAGTATAAATAGCCATTAGGCCCTAAGCGTCAATGATAAGCTCATTGGGTTGGATATGTTCCGGAGCCATACCACATGGTACTCAGCTAAGCCGGAAAGGGGGAGA	143
AGCGGCCGCGACTCTAGAGGTATTAACTCGACTATGCGAGTATAAACAGCCTTTAGGCATAGTGCGTTCATAAGATACTTATGAGGTAGAGACAATTCCGGAGCCATACCACATCTAATCCCACTAAGCCGGAAAGGGGGAGA	143
AGCGGCCGCGACTCTAGAGGTCAAAGCTGGTCACGGCCAGTATAAACAGACATTAAGCCGTGAGCGTCTCCTGTTCTGTGAACGGGAGGGTTGTATAACTCCGGAGCCATACCACATGAGACCTCTCTAAGCCGGAAAGGGGGAGA	146
AGCGGCCGCGACTCTAGAGGGGTAAAGAGGTCACAGCCTCTTAAAATAGACATTAAGCTGTGAGCGTCTCCCGTATTAACGGGAGGGTTGTATAATCTCCGGAGCCATACCACATGTGGCATCACTAAGCCGGAAAGGGGGAGA	144
AGCGGCCGCGACTCTAGAGGCCCCCACTCGTCAGGGCGAGTCTAAATAGCATTTAGGCCCTGAGCGGCTCCCTTCGGGGAGCGTATGATCAACTCCGGAGCCATACCACATTATTCACCCCTAAGCCGGAAAGGGGGAGA	140
AGCGGCCGCGACTCTAGAGGCCCCCACTCGTCATGGCGAGTCTAAATAGCATTTAGGCCATGAGCGGCTCCCTTCGGGGAGCGTATGATCAACTCCGGAGCCATACCACATACACGCCAACTAAGCCGGAAAGGGGGAGA	140
AGCGGCCGCGACTCTAGAGGTCAATGCTCGTCTGGGCGAGGATAAATAGCTGTTAGGCCCAGAGCGGCTCTTCGGATTGTGTTCCCTCCGCAATCCGGGGAGCGTCAGCTTGTATCCGGAGCCATACCACATTAGCACTCGCTAAGCCGGAAAGGGGGAGA	161
AGCGGCCGCGACTCTAGAGGTAGCAACTCGACCGGGCGAGTATAAACAGGATTCAGGCCCGGTGCGTCTCCGGGAAGCCCCGGAGGGTATCAGATCATCCGGAGCCATACCACATTGATCGCGTCTAAGCCGGAAAGGGGGAGA	144
AGCGGCCGCGACTCTAGAGGTAGCAACTCGACCGGGCGAGTATAAACAGGATTCAGGCCCGGTGCGTCTCCCGCGGACGGGTTTGCCGATAGCCCGCGCCGCCGGAGGGTATCAGATCATCCGGAGCCATACCACATACAGCCGAACTAAGCCGGAAAGGGGGAGA	166
AGCGGCCGCGACTCTAGAGGTCTCAACTCGTCAGAGCGAGTATAAATAGCTTTTTAGGCTCTGCGCGTCCTCAAGGTGAAATCCAGATTTGGTAGTAACCTTGAGGGGTAAAGGTTTTTCCGGAGCCATACCACATGCAGGAGAACTAAGCCGGAAAGGGGGAGA	165
AGCGGCCGCGACTCTAGAGGTCTCAACTCGTCAGAGCGAGTATAAATAGCTTTTTAGGCTCTGAGCGTCCTCAAGGTGAAATCCAGATTTGGTAGTAACCTTGGGGGGTAAAGGTTTTTCCGGAGCCATACCACATGTGTTCACACTAAGCCGGAAAGGGGGAGA	165
AGCGGCCGCGACTCTAGAGGCGTCAAGTCGTCTGAGCGACTATAAATAGAGTTCTAGGCTCAGAGCGCCTCCCCTTCGGGGGAGGGAACTATGCATCCGGAGCCATACCACATTACCTAGCCCTAAGCCGGAAAGGGGGAGA	142
AGCGGCCGCGACTCTAGAGGTTATAACTCGACTAGACGAGTATAAACTACATTAAGCCTAGTGCGTTATAGCCGTAAATAAGAAGTAAACGGCTATAGGTTGTAATTAGTCCGGAGCCATACCACATTCCGATAACCTAAGCCGGAAAGGGGGAGA	156
AGCGGCCGCGACTCTAGAGGGAAACAGCCGACCGAGCGGCTATAAACAGGGTTCAAGCTCGGAGCGTTCCCTCTTCGGAGGGAGGTATCTATCAATCCGGAGCCATACCACATACGCATGTACTAAGCCGGAAAGGGGGAGA	142
AGCGGCCGCGACTCTAGAGGAAAAAAGCCGACCGAGCGGCTATAAATAGGGTTTAGGCTCGGTGCGTTCCCTCTTCGGAGGGAGGTATCTAACAATCCGGAGCCATACCACATGTGTGTATCCTAAGCCGGAAAGGGGGAGA	142
AGCGGCCGCGACTCTAGAGGTGAAAAGCCGACCGAGCGGCTATAAACAGGATTTAGGCTCGGTGCGTCCTGCCGGAAACGGCAGGGGTATCAAAATCTCCGGAGCCATACCACATTTCGGTAGGCTAAGCCGGAAAGGGGGAGA	144
AGCGGCCGCGACTCTAGAGGGAGTAAGTGGACCGAGCCACTATAAAGAGGATAATAAGCTCGGAGCGTTCTGCATAAGCAGAGGAATCATAAAATCCGGAGCCATACCACATACGATGAAGCTAAGCCGGAAAGGGGGAGA	141
AGCGGCCGCGACTCTAGAGGACAAAACTCGTTTGGGCGAGTATAAAAAGAAGATTAAGCCCAAAGCGTTCCGACACGCTCGGAGGTCTTGCATTTTCCGGAGCCATACCACATTTACCAGCTCTAAGCCGGAAAGGGGGAGA	142
AGCGGCCGCGACTCTAGAGGTAAAAAATCGTCTAAGCGATTTCAAAAAAGGTAATTAGGCTTAGAGCGTCCCCGATAATATCGGGGGGTTTACAAACTTCCGGAGCCATACCACATGTACAGCGACTAAGCCGGAAAGGGGGAGA	145
AGCGGCCGCGACTCTAGAGGCTAAAAGTCGACTAAGCGACAAAAAAAAGGTAATTAGGCTTAGAGCGTCCCCGATATTTCGGGGGGTTTACAAACTTCCGGAGCCATACCACATTTAAAGGGGCTAAGCCGGAAAGGGGGAGA	143
AGCGGCCGCGACTCTAGAGGTAGCAGCTCGGCTGGGCGAGCATAAATAGGATTCAGGCCCAGTGCGTCCGGGAAGGAGGGCATTTGCCGATGGCCCAAGCTCCCGGGGTATCAGACAGTCCGGAGCCATACCACATTCTACAGCCCTAAGCCGGAAAGGGGGAGA	165
AGCGGCCGCGACTCTAGAGGTAGCAACTCGGCTGGGCGAGCATAAATAGGATTCAGGCCCAGTGCGTCCGGGAAGGAGGGCATTTGCCGATGGCCCAAGCTCCCGGGGTATCAGACAGTCCGGAGCCATACCACATAGTCTGCTTCTAAGCCGGAAAGGGGGAGA	165
AGCGGCCGCGACTCTAGAGGAGCGGTCTCGGCTGGGCGAGCATAAATAGGATTCAGGCCCAGTGCGTCCGGGAAGGAGGGCATTTGCCGATGGCCCAAGCTCCCGGGGTATCAGACAGTCCGGAGCCATACCACATAGATCGTAGCTAAGCCGGAAAGGGGGAGA	165
AGCGGCCGCGACTCTAGAGGCGGGAACTCGTCTAAGCGAGTCTAAACAGATCTTTAAGCTTAGAGCGTCTCTGGTCATAAAGACCAGAGGGTAGATAGAAGTCCGGAGCCATACCACATATTGACCCTCTAAGCCGGAAAGGGGGAGA	148
AGCGGCCGCGACTCTAGAGGCGGGAACTCGTCTAAGCGAGTCTAAACAGATCTTTAAGCTTAGAGCGTCTCTGGTCTTTATGACCAGAGGGTAGATAGAAGTCCGGAGCCATACCACATGTCTGCGTACTAAGCCGGAAAGGGGGAGA	148
AGCGGCCGCGACTCTAGAGGCGGGAACTCGTCTAAGCGAGTCTAAATAGATCTTTAAGCTTAGAGCGTCTCTGGTCTTTATGATCAGAGGGTAGATAATAGTCCGGAGCCATACCACATTTCGCAAGACTAAGCCGGAAAGGGGGAGA	148
AGCGGCCGCGACTCTAGAGGACACAACTGGTCTGAGCCAGTATAAATAGATGCTTAAGCTTAGAGCGTTATAGCCAGTATATGGCTATAGGTGCAATCGTCTCCGGAGCCATACCACATTCGCGATCACTAAGCCGGAAAGGGGGAGA	148
AGCGGCCGCGACTCTAGAGGGCGAAACTCGGCTTGGCGAGTATAAATAGCCATTAAGCCAAGCGCGTCCTTGCCCGGTGTAAAAAACCGGGCAAGGGGTTGGAAAAATTCCGGAGCCATACCACATATCTACCGTCTAAGCCGGAAAGGGGGAGA	155
AGCGGCCGCGACTCTAGAGGTCGCAACTCGTCTGAGCGAGTATAAATAGGCCACTAGGCTCAGAGCGGCTCCCCAAGTAATTATCTTGGGGGGCGATGGAAAATATCCGGAGCCATACCACATAACACAAGGCTAAGCCGGAAAGGGGGAGA	152
AGCGGCCGCGACTCTAGAGGAGCAAACTGGGCAGTGCCAGGATAAACAGGCTTTAGGCGCTGAGCGTTGGCCGCTCTTAACCGGGTGGCCAGGTAGTAATAACTCCGGAGCCATACCACATGGTCCTTGTCTAAGCCGGAAAGGGGGAGA	150
AGCGGCCGCGACTCTAGAGGAACAAACTGGACAGCGCCAGGATAAACAGGCTTTAAGCGCTGAGCGTTGGCCGCTCTTAACCGGGTGGCCAGGTAGTAATAACTCCGGAGCCATACCACATGTCAATCGACTAAGCCGGAAAGGGGGAGA	150
AGCGGCCGCGACTCTAGAGGAACAAACTGGACAGCGCCAGTATAAACAGGCTTTAAGCGCTGAGCGTTGGCCGCTCTTAATTGAGTGGTCAGGTAGTAATAAATCCGGAGCCATACCACATCGTTTCGGACTAAGCCGGAAAGGGGGAGA	150
AGCGGCCGCGACTCTAGAGGAAATAACTCGACTAAACGAGTATAAATAGACATTAAGTTTAGTGCGTTACCACTGTGAAAGGTGGTAGGTTGTAACATGTCCGGAGCCATACCACATGACGGAATGCTAAGCCGGAAAGGGGGAGA	146
AGCGGCCGCGACTCTAGAGGTAAATAGTCGTCTGAGCGACTTAAAATAGGCTTTAAGCTCAGAGCGTAGCCCTTCGGGGCTGGGTAGTTAAAAATCCGGAGCCATACCACATAATGCGTCGCTAAGCCGGAAAGGGGGAGA	141
AGCGGCCGCGACTCTAGAGGCAGGGAGTCGTCAGGGCGACTTTAAATAGGCTTTAGGCCCTGAGCGTGACCGGTTCGCCGGTCGGTAGTATAAACTCCGGAGCCATACCACATGCGAACTAACTAAGCCGGAAAGGGGGAGA	142
AGCGGCCGCGACTCTAGAGGGTAATGGTCCTCAGGGGGACTTTAAATAGGCTTTAGGTCCTGAGCGTGACCACTGCGGTGGTCGGTAGCAATAATTCCGGAGCCATACCACATTGTGCGAGACTAAGCCGGAAAGGGGGAGA	142
AGCGGCCGCGACTCTAGAGGCGAACACTCGTCTGAGCGAGTATAAACAGCATATTAAGCTCAGAGCGTCTCCCCGAAAGGGGAGGGTTATGTGTAATCCGGAGCCATACCACATGGTGTCATACTAAGCCGGAAAGGGGGAGA	143
AGCGGCCGCGACTCTAGAGGAAAAGGCTCGTCTGAGCGAGGGTAAATAGTGTTTAGGCTCAGAGCGTTCCGGGAAATTGCCGGAGGTACATTATTTTCCGGAGCCATACCACATGATGTTGGCCTAAGCCGGAAAGGGGGAGA	143
AGCGGCCGCGACTCTAGAGGTTAAATCTCGTTAGGGCGAGGATAAAAAGACATTAAGCCCTAAGCGTTCTCCTTCGGGAGAGGTTGTAAAGTTTCCGGAGCCATACCACATTCGCACTCTCTAAGCCGGAAAGGGGGAGA	140
AGCGGCCGCGACTCTAGAGGTGTGGACTCGTCAGGGCGAGTATAAACAGTCCATTAGGCCCTGAGCGTCCCCCCACCCGCTGTGGGGGGGTTGGATCATTTCCGGAGCCATACCACATGTAATGGCTCTAAGCCGGAAAGGGGGAGA	147
AGCGGCCGCGACTCTAGAGGATAGCCGTCGTCAGGGCGACGTTAAATAGCCATTAGGCCCTGAGCGTCACTTCTCTTCGGAGAAGTGGGTTGGACATCTTCCGGAGCCATACCACATGCTGAACTGCTAAGCCGGAAAGGGGGAGA	146
AGCGGCCGCGACTCTAGAGGTTAACAGTCGTCAGGGCGACTATAAACAGCCATTAGGCCCTGTAGCGTCCCCTTTGAGGAGGGGGGTTGGAATGCGTCCGGAGCCATACCACATCAACAGCCACTAAGCCGGAAAGGGGGAGA	143
AGCGGCCGCGACTCTAGAGGGAAACAGTCGTTAGGGCGACTATAAACAGACATTAAGCCCTAAGCGTCCCCTACTAGCTAGGGGGGTTGTATAACCTCCGGAGCCATACCACATCCACTCATACTAAGCCGGAAAGGGGGAGA	143
AGCGGCCGCGACTCTAGAGGTTAACAGTCGTCAGGGCGACTATAAACAGCCATTAAGCCCTGTAGCGTCCACACCCCAGCAATCAGGCTGGGGTATATGTATGGTGGGGTTGGATATAATCCGGAGCCATACCACATCTTAACGACCTAAGCCGGAAAGGGGGAGA	166
AGCGGCCGCGACTCTAGAGGTTATGACTCGTCCCAGCGAGTATAAATAGGACATTAGGCTGGAGCGGTACATTTGTGCGTTGTCAAACCTCCGGAGCCATACCACATTTGAGGTGGCTAAGCCGGAAAGGGGGAGA	136
AGCGGCCGCGACTCTAGAGGTCTTAACTCCTCTGAGGGAGTATAAATAGTCCTTAGGCTCAGAGCGTTACATTTATGTAGGTGGAAACCATTCCGGAGCCATACCACATTAAGCCCTCCTAAGCCGGAAAGGGGGAGA	138
AGCGGCCGCGACTCTAGAGGTCCAAACTCGTCTGAGCGAGTATAAATAGTATCCTTAGGCTCAGAGCGTCACATATTTATGTGGGTGGATTTTCATCCGGAGCCATACCACATGGTTGGTGACTAAGCCGGAAAGGGGGAGA	142
AGCGGCCGCGACTCTAGAGGTATTAACTCGTCATAGCGAGTATAAATAGTGTCCTTAGGCTATGTAGCGTTATAATTATAGGTGGACAACAATCCGGAGCCATACCACATACAACTCGGCTAAGCCGGAAAGGGGGAGA	139
AGCGGCCGCGACTCTAGAGGTGAAAAGTCGGCACAGCGACTATAAAAAGGGCTTTAGGCTGTGAGCGTTACGCCCTGAGTGATCAGGGCATAGGTAGCCAAGATTCCGGAGCCATACCACATGCAGACCATCTAAGCCGGAAAGGGGGAGA	151
AGCGGCCGCGACTCTAGAGGGAAAAAGTCGTCACAGCGACTATAAAAAGGGCTTTAGGCTGTGAGCGTTACGCCCTGAGTAATCAGGGCATAGGTAGCCAAGATTCCGGAGCCATACCACATTTCACAAGCCTAAGCCGGAAAGGGGGAGA	151
AGCGGCCGCGACTCTAGAGGTAGGCACTCGGCTGGGCGAGTATAAACAGTCATTAGGCCCAGAGCGTCCCCTTGGGTGAGATCTCACCCTTGGGGGGTTGAAAATTTTCCGGAGCCATACCACATTGGTCTTCCCTAAGCCGGAAAGGGGGAGA	154
AGCGGCCGCGACTCTAGAGGTCTGTGCTCGTCTGGGCGAGGATAAACAGCTATTAAGCCCAGAGCGTTCCGGCTCTTTATGATTCGGAGGTTTAGCATATCTCCGGAGCCATACCACATATCTACCCCCTAAGCCGGAAAGGGGGAGA	148
AGCGGCCGCGACTCTAGAGGTCTGCGCTCGTCTGGGCGAGGATAAACAGCTATTAAGCCCAGAGCGTTCCGGTTATATGATCGGAGGTTTAGCATATATCCGGAGCCATACCACATTGGAAAGGGCTAAGCCGGAAAGGGGGAGA	145
AGCGGCCGCGACTCTAGAGGATAAGACTCGTCTGAGCGAGTATAAACAGTAATTAAGCTCAGAGCGTCTCGGAGTTATCCGGGGGTTTAGCAGTTTCCGGAGCCATACCACATAGGTACGGACTAAGCCGGAAAGGGGGAGA	142
AGCGGCCGCGACTCTAGAGGATAAGACTCGTCTGAGCGAGTATAAACAGTAATTAAGCTCAGAGCGTCTCGGAGTGATCCGGGGGTTTAGCAGTTTCCGGAGCCATACCACATATCACTGTGCTAAGCCGGAAAGGGGGAGA	142
AGCGGCCGCGACTCTAGAGGGCTTTACTCGTCTGGGCGAGGATAAACAGTGATTAGGCCCAGAGCGTCCTGGCTCTTTGCCAGGGGTTCAGTTTATTCCGGAGCCATACCACATCTAGTGTGGCTAAGCCGGAAAGGGGGAGA	143
AGCGGCCGCGACTCTAGAGGTGAATGCTCGTCTGGGCGAGGGTAAAAAGTGATTAGGCCCAGAGCGTCCTGGTTGGCCGGATCGGTCTGCTGGGGGTTCAGCAAATTCCGGAGCCATACCACATATCACACCCCTAAGCCGGAAAGGGGGAGA	153
AGCGGCCGCGACTCTAGAGGTGAATGCTCGTCTGGGCGAGGGTAAATAGTGATTAGGCCCAGAGCGTCCTGGTTGGCCGGATCGGTCTGCTGGGGGTTCAGCAAATTCCGGAGCCATACCACATCGACAGAAGCTAAGCCGGAAAGGGGGAGA	153
AGCGGCCGCGACTCTAGAGGTGAATGCTCGTCTGGGCGAGGGTAAATAGTGATTAGGCCCAGAGCGTCCTGGTTGGCCGGATCGGTCTGCTGGGGGGTTCAGCAAATTCCGGAGCCATACCACATGGTTAAAGCCTAAGCCGGAAAGGGGGAGA	154
AGCGGCCGCGACTCTAGAGGTGAAGACTCGTCTGGGCGAGTATAAATAGTAATTAGGCCCAGAGCGTCCTGGCGCGATCGCACGATCGGCTGGGGGTTTAGCTGTATCCGGAGCCATACCACATTATCGTCGTCTAAGCCGGAAAGGGGGAGA	153
AGCGGCCGCGACTCTAGAGGTGGAAACTCGTCTGGGCGAGTATAAATAGTAATTAGGCCCAGAGCGTCCTGGCACGATCGGCCGGGGGTTTAGCTGTATCCGGAGCCATACCACATAGACTGTGCCTAAGCCGGAAAGGGGGAGA	145
AGCGGCCGCGACTCTAGAGGTCAAAGCTCGTCTGGGCGAGGGTAAATAGTAATTAGGCCCAGAGCGTCCCGGCTCCTGGTTCGCCGGTCGGGGGTTTAGCAGTTTCCGGAGCCATACCACATATGGGACCTCTAAGCCGGAAAGGGGGAGA	151
AGCGGCCGCGACTCTAGAGGTGAAAACTCGTCTGGGCGAGTATAAATAGTAATTAGGCCCAGAGCGTCCTGGCGCGATCGTGCGGTCGGCCGTGGGTTTAGCTGTATCCGGAGCCATACCACATACCATCCAGCTAAGCCGGAAAGGGGGAGA	153
AGCGGCCGCGACTCTAGAGGTGAAAACTCGTCTGGGCGAGTATAAACAGTAATTAGGCCCAGAGCGTCCTGGCGCGATCGTGCGGTCGGCCGGGGGTTTAGCTGTATCCGGAGCCATACCACATGCAGTCTTCCTAAGCCGGAAAGGGGGAGA	153
AGCGGCCGCGACTCTAGAGGTGAAAACTCGTCTGGGCGAGTATAAATAGTAATTAGGCCCAGAGCGTCCTGGCGCGATCGTGCGGTCGGCCGGGGGTTTAGCTGTATCCGGAGCCATACCACATCACCATTCGCTAAGCCGGAAAGGGGGAGA	153
AGCGGCCGCGACTCTAGAGGTGAAAACTCGTCTGGGCGAGTATAAATAGTAATTAGGCCCAGAGCGTCCTGGCGCGATCGCACGATCGACCGGTGGTTTAGCTGTATCCGGAGCCATACCACATGACCAGAAACTAAGCCGGAAAGGGGGAGA	153
AGCGGCCGCGACTCTAGAGGTGAAGACTCGTCTGGGCGAGTATAAATAGTAATTAGGCCCAGAGCGTCCTGGCGCGATCGCACGATCGGCCGGGGGTTTAGCTGTATCCGGAGCCATACCACATATCTATGCGCTAAGCCGGAAAGGGGGAGA	153
AGCGGCCGCGACTCTAGAGGAGAAAGCTCGTCTGGGCGAGGGTAAATAGTAATTTGGCCCAGAGCGTCTTGGCCGGAAGTTACCGACCGGGGGTTTAGAAATATCCGGAGCCATACCACATGTAAAGCAGCTAAGCCGGAAAGGGGGAGA	150
AGCGGCCGCGACTCTAGAGGTCAATGCTCGTCTGGGCGAGGGTAAAGAGTAATTAGGCCCAGAGCGTCTTGGCTGGCCGGATCGGCCTGCTGGGGGTTTAGCAATTTCCGGAGCCATACCACATTTGTTTGCCCTAAGCCGGAAAGGGGGAGA	153
AGCGGCCGCGACTCTAGAGGGAAAAGCTCGTCTGGGCGAGGGTAAACAGTAATTAGGCCCAGAGCGTCTTAGCTGGCCGGATCGGCCTGCTGGGGGTTTAGCAATTTCCGGAGCCATACCACATCAAGTAGTGCTAAGCCGGAAAGGGGGAGA	153
AGCGGCCGCGACTCTAGAGGTGCAGGTTCGTCTGGGCGAGGGTAAATAGTAATTAGGCCCAGAGCGTCTTGGTTGGCAGATTTGCCAGTCGGGGGGTTAGAATTTTCCGGAGCCATACCACATTGTGACAGCCTAAGCCGGAAAGGGGGAGA	152
AGCGGCCGCGACTCTAGAGGTTCATGCTCGTCTGGGCGAGGGTAAATAGTAATTAGGCCCAGAGCGTCTTGGCCGGGAGCTACCGGTCAGGGGTTTAGCAGTTTCCGGAGCCATACCACATTCCTAAGTCCTAAGCCGGAAAGGGGGAGA	150
AGCGGCCGCGACTCTAGAGGTTCATGCTCGTCTGGGCGAGGGTAAATAGTAATTAGGCCCAGAGCGTCTTGGCCGGGAGCTGCCGGTCAAGGGTTTAGCAGTTTCCGGAGCCATACCACATCTCAGCAAACTAAGCCGGAAAGGGGGAGA	150
AGCGGCCGCGACTCTAGAGGTTCATGCTCGTCTGGGCGAGGGTAAATAGGAATTAGGCCCAGAGCGTCTTGGCCGGGAGCTGCCGGTCAGGGGTTTAGCAGTTTCCGGAGCCATACCACATAAGAGGTGTCTAAGCCGGAAAGGGGGAGA	150
AGCGGCCGCGACTCTAGAGGTTCATGCTCGTCTGGGCGAGGGTAAATAGTAATTAGGCCCAGAGCGTCTTGGCCGGGAGCTGCCGGTCAGGGGTTTAGCAGTTTCCGGAGCCATACCACATCCCAGGTTACTAAGCCGGAAAGGGGGAGA	150
AGCGGCCGCGACTCTAGAGGAAATTGCTCGTCTGGGCGAGGGTAAATAGTAATTAGGCCCAGAGCGTCTTGGCCGGGAGCTGCCGGCTGGGGGTTTAGCTGTATCCGGAGCCATACCACATCAGATGAACCTAAGCCGGAAAGGGGGAGA	150
AGCGGCCGCGACTCTAGAGGGGAAGGCTCGTCTGGGCGAGGGTAAATAGTAATTAGGCCCAGAGAGTCTTGGCTGACAGATCTGTCGGTCGGGGGTTAGCAATTTTCCGGAGCCATACCACATAATCGGCTACTAAGCCGGAAAGGGGGAGA	152
AGCGGCCGCGACTCTAGAGGATGAAGCTCGTCTGGGCGAGGGTAAATAGTAATTAGGCCCAGAGCGTCTTGGCTGGCAGATCTGCCGGCTGGGGGTTTAGCAATTTCCGGAGCCATACCACATTCGGGTTCACTAAGCCGGAAAGGGGGAGA	152
AGCGGCCGCGACTCTAGAGGATGAAGCTCGTCTGGGCGAGGGTAAATAGTAATTAGGCCCAGAGCGTCTTGGCTGGCAGATATGCCGGCTGGGGGTTTAGCAATTTCCGGAGCCATACCACATTTACCTCGTCTAAGCCGGAAAGGGGGAGA	152
AGCGGCCGCGACTCTAGAGGACGAAGCTCGGCGGGGCGAGGGTAAATAGTAATTAGGCCCAGAGCGTCTTGGCTGGCAGATATGCCGGTCGGGGGTTTAGCAATTTCCGGAGCCATACCACATCGAGCAGTACTAAGCCGGAAAGGGGGAGA	152
AGCGGCCGCGACTCTAGAGGATGAAGCTCGTCTGGGCGAGGGTAAATAGTAATTAGGCCCAGAGCGTCTTGGCTGGCAAATCTGCCGGTCGGGGGTTTAGCAATTTCCGGAGCCATACCACATAGTCACAGGCTAAGCCGGAAAGGGGGAGA	152
AGCGGCCGCGACTCTAGAGGACGAAGCTCGTCTGGGCGAGGGGAAATAGTAATTAGGCCCAGAGCGTCTTGGCTGGCAGATCTGCCGGTCGGGGGTTTAGCAATTTCCGGAGCCATACCACATCTCGTATGCCTAAGCCGGAAAGGGGGAGA	152
AGCGGCCGCGACTCTAGAGGATGAAGCTCGTCTGGGCGAGGTTAAATAGTAATTAGGCCCAGAGCGTCTTGGCTGGCAGATCTGCCGGTCGGGGGTTTAGCAATTTCCGGAGCCATACCACATTAGCCTGATCTAAGCCGGAAAGGGGGAGA	152
AGCGGCCGCGACTCTAGAGGAGAAAACTCGTCTGGGCGAGGGTAAATAGTAATTAGGCCCAGAGCGTCTTGGCTGGCAGATCTGCCGGTCGGGGGTTTAGCAATTTCCGGAGCCATACCACATCACAGGATACTAAGCCGGAAAGGGGGAGA	152
AGCGGCCGCGACTCTAGAGGATTAAGCTCGTCTGGGCAAGGGTAAATAGTAATTAGGCCCAGAGCGTCTTGGCTGGCAGATCTGCCGGTCGGGGGTTTAGCAATTTCCGGAGCCATACCACATATTGGCAGACTAAGCCGGAAAGGGGGAGA	152
AGCGGCCGCGACTCTAGAGGATGAAGCTCGTCTGGGCGAGGGTAAATAGTAATTAGGCCCAGAGCGTCTTGGCTGGCAGATATGCCGGTCGGGGGTTTAGCAATTTCCGGAGCCATACCACATACTTTCACGCTAAGCCGGAAAGGGGGAGA	152
AGCGGCCGCGACTCTAGAGGATGAAGCTCGTCTGGGCGAGGGTAAATAGTAATTAGGCCCAGAGCGTCTTGGCTGGCAGATCTGCCGGTCGGGGGTTTAGCAATTTCCGGAGCCATACCACATAACAGGACTCTAAGCCGGAAAGGGGGAGA	152
AGCGGCCGCGACTCTAGAGGGGAAGGCGCGTCTGGGCGAGGGTAAATAGTAATTAGGCCCAGAGAGTCTTGGCTGACAGATCTGTCGGTCGGGGGGTTAGCAATTTCCGGAGCCATACCACATCGCATTGAACTAAGCCGGAAAGGGGGAGA	152
AGCGGCCGCGACTCTAGAGGGGAAGGCTCGTCTGGGCGAGGGTAAATAGTAATTAGGCCCAGAGAGTCTTGGCTGACAGATCTGTCGGTCGGGGGGTTAGCAATTTCCGGAGCCATACCACATGCGATCCATCTAAGCCGGAAAGGGGGAGA	152
AGCGGCCGCGACTCTAGAGGAGAAAACTCGTCTGGGCGAGTATAAATAGTAATTAGGCCTAGAGCGTCCCGGTCAGCTGCCGGGGGTTTAGCAGTTTCCGGAGCCATACCACATTGCTAAACGCTAAGCCGGAAAGGGGGAGA	143
AGCGGCCGCGACTCTAGAGGAATAGGCTCGTCTGGGCGAGGGTAAACAGTAATTAGGCCCAGAGCGTCCCGGCAGTTGTTGGGGGTTTAGCAGTTTCCGGAGCCATACCACATTTGGCTGTTCTAAGCCGGAAAGGGGGAGA	142
AGCGGCCGCGACTCTAGAGGAATAGGCTCGTCTGGGCGAGTATAAATAGTAATTAGGCCCAGAGCGTCTCGGCAGCTGCCGGGGGTTTAGCAGTTTCCGGAGCCATACCACATTTTCGCCAACTAAGCCGGAAAGGGGGAGA	142
AGCGGCCGCGACTCTAGAGGGGTAGGCTCGTCTGGGCGAGGGTAAAGAGTGATTAGGCCCAGAGCGTCTTGGCCGGAGCTGCCGGCTGGGGGTTCAGCAAATTCCGGAGCCATACCACATGTTACAGCCCTAAGCCGGAAAGGGGGAGA	149
AGCGGCCGCGACTCTAGAGGAATCGGCTCGTCTGGGCGAGGGTAAATAGTAATTAGGCCCAGAGCGTCTTGGCCGGAGCTGCCGGCTGGGGGTTTAGCAAATTCCGGAGCCATACCACATTCAAGAGTCCTAAGCCGGAAAGGGGGAGA	149
AGCGGCCGCGACTCTAGAGGAATAGGCTCGTCTGGGCGAGGGTAAATAGTAATTAGGCCTAGAGCGTCCCGGTAGCTGCCGGGGGTTTAGCAGTTTCCGGAGCCATACCACATCTGATTCCGCTAAGCCGGAAAGGGGGAGA	142
AGCGGCCGCGACTCTAGAGGAATAGTCTCGTCTGGGCGAGGATAAATAGTAATTAGGCCCAGAGCGTCCCGGCGACTGCCGGGGGTTTAGCAGTTTCCGGAGCCATACCACATCTGCACCTACTAAGCCGGAAAGGGGGAGA	142
AGCGGCCGCGACTCTAGAGGAGAAAACTCGTCTGGGCGAGGATAAATAGTAATTAGGCCCAGAGCGTCCCGGCGGCTGCCGGGGGTTTAGCAGTTTCCGGAGCCATACCACATACGTTACGACTAAGCCGGAAAGGGGGAGA	142
AGCGGCCGCGACTCTAGAGGAATAGGCTCGTCTGGGCGAGGGTAAACAGTAATTAGGCCCAGAGCGTTCCGGCTGCTGCCGGGGGTTTAGCAGTTTCCGGAGCCATACCACATAAATCCCACCTAAGCCGGAAAGGGGGAGA	142
AGCGGCCGCGACTCTAGAGGAATAGGCTCGTCTGGGCGAGGGTAAACAGTAATTAGGCCCAGAGCGTCCCGGCTGCTGCCGGGGGTTTAGCAGTTTCCGGAGCCATACCACATTGGTTCTCCCTAAGCCGGAAAGGGGGAGA	142
AGCGGCCGCGACTCTAGAGGAGAAAACTCGTCTGGGCGAGGGTAAACAGTAATTAGGCCCAGAGCGTCCCGGCAGCTGCCGGGGGTTTAGCAGTTTCCGGAGCCATACCACATAGAGACCAACTAAGCCGGAAAGGGGGAGA	142
AGCGGCCGCGACTCTAGAGGAATAGGCTCGTCTGGGCGAGGGTAAACAGTAATTAGGCCCAGAGCGTCCCGGCAGCTGCCGGGGGTTTAGCAGTTTCCGGAGCCATACCACATATCTTTCCGCTAAGCCGGAAAGGGGGAGA	142
AGCGGCCGCGACTCTAGAGGAGAAAACTCGTCTGGGCGAGGGTAAATAGTAATTAGGCCCAGAGCGTCCCGGCAGCTGCCGGGGGTTTAGCAGTTTCCGGAGCCATACCACATTGTCTGATGCTAAGCCGGAAAGGGGGAGA	142
AGCGGCCGCGACTCTAGAGGAGAAAACTCGTCTGGGCGAGGGTAAATAGTAATTAGGCCCAGAGCGTCCCGGCAGTTGCCGGGGGTTTAGCAGTTTCCGGAGCCATACCACATCTACTCAGCCTAAGCCGGAAAGGGGGAGA	142
AGCGGCCGCGACTCTAGAGGACGAAGCTCGTCTGGGGGAGGGTAAATAGTAATTAGGCCCAGAGCGTCCTGGCAGCTGCCGGGGGTTTAGCAGTTTCCGGAGCCATACCACATTTGCGGATTCTAAGCCGGAAAGGGGGAGA	142
AGCGGCCGCGACTCTAGAGGAATAGGCTCGTCTGGGCGAGGGTAAATAGTAATTAGGCCCAGAGCGTCCTGGCAGCTGCCGGGGGTTTAGCAGTTTCCGGAGCCATACCACATCCGGTATTGCTAAGCCGGAAAGGGGGAGA	142
AGCGGCCGCGACTCTAGAGGAATAGGCTCGTCTGGGCGAGGGTAAATAGTAATTAGGCCCAGAGCGTCCCGGCAGCTGCCGGGGGTTTAGCAGTTTCCGGAGCCATACCACATGTACAGACGCTAAGCCGGAAAGGGGGAGA	142
AGCGGCCGCGACTCTAGAGGAGAAAACTCGTCTGGGCGAGTATAAATAGTAATTAGGCCCAGAGCGTCCCGGCCGCTGCCGGGGGTTTAGCAGTTTCCGGAGCCATACCACATCCCGTAAAGCTAAGCCGGAAAGGGGGAGA	142
AGCGGCCGCGACTCTAGAGGAGAAAACTCGTCTGGGCGAGTATAAATAGTAATTAGGCCTAGAGCGTCCCGGCTGCTGCCGGGGGTTTAGCAGTTTCCGGAGCCATACCACATCCGTAAAGGCTAAGCCGGAAAGGGGGAGA	142
AGCGGCCGCGACTCTAGAGGAGAAAACTCGTCTGGGCGAGTATAAATAGTAATTAGGCCTAGAGCGTCCCGGTAGCTGCCGGGGGGTTAGCAGTTTCCGGAGCCATACCACATTTCTGCACCCTAAGCCGGAAAGGGGGAGA	142
AGCGGCCGCGACTCTAGAGGAGAAAACTCGTCTGGGCGAGTATAAATAGTAATTAGGCCTAGAGCGTCCCGGTAGCTGCCGGGGGTTTAGCAGTTTCCGGAGCCATACCACATCAAAGGATGCTAAGCCGGAAAGGGGGAGA	142
AGCGGCCGCGACTCTAGAGGAGAAAACTCGTCTGGGCGAGTATAAAGAGTAATTAGGCCTAGAGCGTCCCGGCAGCTGCCGGGGGTTTAGCAGTTTCCGGAGCCATACCACATATTGGGTGCCTAAGCCGGAAAGGGGGAGA	142
AGCGGCCGCGACTCTAGAGGAGAAAACTCGTCTGGGCGAGTATAAATAGTAATTAGGCCTAGAGCGTCCCGGCAGCTGCCGGGGGTTTAGCAGTTTCCGGAGCCATACCACATAGACAGGACCTAAGCCGGAAAGGGGGAGA	142
AGCGGCCGCGACTCTAGAGGAGAAAACTCGTCTGGGCGAGTATAAAGAGTAATTAGGCCTAGAGCGTCCCGGCTGCTGCCGGGGGTTTAGCAGTTTCCGGAGCCATACCACATGTAAGCACTCTAAGCCGGAAAGGGGGAGA	142
AGCGGCCGCGACTCTAGAGGCAAGAACTCGTCCGGGCGAGTATAAACTGTAATCAGGCCCAGAGCGTTCCGGCCCTCGTCGGAGGTTTAGCCTTTTCCGGAGCCATACCACATTTCCACGTGCTAAGCCGGAAAGGGGGAGA	142
AGCGGCCGCGACTCTAGAGGCAAGAACTCGTCTGGGCGAGTATAAACAGTAATTAGGCCCAGAGCGTTCCGGCCTTCGTCGGAGGTTTAGCATTTTCCGGAGCCATACCACATTTGCGTAAGCTAAGCCGGAAAGGGGGAGA	142
AGCGGCCGCGACTCTAGAGGCAAGAACTCGTCTGGGCGAGTATAAACAGTAATTAGGCCCAGAGCGTTCCGGCTTTCGTCGGAGGTTTAGCATTTTCCGGAGCCATACCACATTCAGGGCAACTAAGCCGGAAAGGGGGAGA	142
AGCGGCCGCGACTCTAGAGGAGCAGGCTCGTCTGGGCGAGGATAAATAGTAATTAGGCCCAGAGCGTCTTGGTCGGTATTACCGGCTGGGGGGTTAGCATTTTCCGGAGCCATACCACATCGCTTTCGTCTAAGCCGGAAAGGGGGAGA	149
AGCGGCCGCGACTCTAGAGGATGAAGCTCGTCTGGGCGAGGATAAATAGTAATTAGGCCCAGAGCGTCTTGGTCGGTATTACCGGCTGGGGGGGTAGCATTTTCCGGAGCCATACCACATCTCATCCAACTAAGCCGGAAAGGGGGAGA	149
AGCGGCCGCGACTCTAGAGGATGAAGCTCGTCTGGGCGAGGATGAATAGTAATTAGGCCCAGAGCGTCTTGGTCGGTATTACCGGCTGGGGGGGTAGCATTTTCCGGAGCCATACCACATAGGTCTCAGCTAAGCCGGAAAGGGGGAGA	149
AGCGGCCGCGACTCTAGAGGATGAAGCTCGTCTGGGCGAGGATGAATAGTAATTAGGCCCAGAGCGTCTTGGTCGGTATTACCGGCTGGGGGGATAGCATTTTCCGGAGCCATACCACATGACCAACAACTAAGCCGGAAAGGGGGAGA	149
AGCGGCCGCGACTCTAGAGGATGAAGCTCGTCTGGGCGAGGATGAATAGTAATTAGGCCCAGAGCGTCTTGGTCGGTATTACCGGCTGGGGGGTTAGCATTTTCCGGAGCCATACCACATCCAAAAGGACTAAGCCGGAAAGGGGGAGA	149
AGCGGCCGCGACTCTAGAGGTTATCAGTCGACCTAGCGACTATAAATAGGCTTTAGGCTAGGAGCGTGACCACTTCGGTGGTCGGTAGTCCGGAGCCATACCACATCCGATGGAACTAAGCCGGAAAGGGGGAGA	135
AGCGGCCGCGACTCTAGAGGATTGAACTCGTCTGAGCGAGTATAAACACCATTAGGCTCAGAGCGTCCCTTCCCAAGAGAGAAAACCCTATAGGCTCGTTGGGAAGGGGGTTGGAAATTCTCCGGAGCCATACCACATAGTAGATCGCTAAGCCGGAAAGGGGGAGA	167
AGCGGCCGCGACTCTAGAGGTGGGAACTGGACAGAGTCAGTATAAATAGGCTTTAAGCTCTGAGCGTGACCAACTTCGGTTGGTCGGTAGTTTAACATCCGGAGCCATACCACATCAATTCCAGCTAAGCCGGAAAGGGGGAGA	144
AGCGGCCGCGACTCTAGAGGTCTAGACTCGACTAAGCGAGTATAAAGAGGCATTAGGCTTAGAGCGTGACCAACTTCGGTTGGTCGGTTGTTTAATTTCCGGAGCCATACCACATGGACAACCTCTAAGCCGGAAAGGGGGAGA	144
AGCGGCCGCGACTCTAGAGGAGGCGACTCGACCTAGCGAGTATAAACAGGCTTTAGGCTAGGAGCGTGACCACTTCGGTGGTCGGTAGCAATAACTCCGGAGCCATACCACATAACCTCCACCTAAGCCGGAAAGGGGGAGA	142
AGCGGCCGCGACTCTAGAGGTAGGCACTCGTCTGAGCGAGTATAAATAGACATTAGGCTCAGAGCGCCCCCAAGGCTACGTCCTTTGGGGGGTTGAAAACTTTCCGGAGCCATACCACATCCACATACTCTAAGCCGGAAAGGGGGAGA	149
AGCGGCCGCGACTCTAGAGGGCTTAACTCGTCTGAGCGAGTATAAACCACTTTAGGCTCAGAGCGTCCCCACTTCGGTGGGGGGTAGCAATAATTCCGGAGCCATACCACATACTAGGCCTCTAAGCCGGAAAGGGGGAGA	141
AGCGGCCGCGACTCTAGAGGAAGAAACTCGACTAAGCGAGTATAAATAGGCATTAGGCTTAGAGCGTTCCAATGTTGTGAAACATCGGAGGTTGTTTAACTTCCGGAGCCATACCACATGGACGTACACTAAGCCGGAAAGGGGGAGA	148
AGCGGCCGCGACTCTAGAGGACATAACTGGACTACGCCAGTATAAATAGGCATTAAGCGTAGTGCGTTCCAATGTTGTGAAACATCGGAGGTTGTTTAATTTCCGGAGCCATACCACATGACTGATGTCTAAGCCGGAAAGGGGGAGA	148
AGCGGCCGCGACTCTAGAGGAATAAACTGGACTACGCCAGTATAAATAGGCATTAAGCGTAGTGCGTTCCAGTCTTCACAGACTGGAGGTTGTTTAATTTCCGGAGCCATACCACATGGATTCGCACTAAGCCGGAAAGGGGGAGA	146
AGCGGCCGCGACTCTAGAGGTCTAGACTTGACTAAGCAAGTATAAACAGGCATTAGGCTTAGAGCGTTCCAGTCTTCGGACTGGAGGTTGTTTAACTTCCGGAGCCATACCACATACGGATCAACTAAGCCGGAAAGGGGGAGA	144
AGCGGCCGCGACTCTAGAGGCTAAAAGTCGACTAAGCGACTATAAACAGGCATTAGGCTTAGAGCGTTCCAGTCTTCGGACTGGAGGTTGTTTAATATCCGGAGCCATACCACATCCGTGTGATCTAAGCCGGAAAGGGGGAGA	144
AGCGGCCGCGACTCTAGAGGAGAAAACTCGACTAAGCGAGTATAAACAGGCATTAGGCTTAGAGCGTTCTCACGTTATCTGAATGATGATGTGAGAGGTTGCAATAGATCCGGAGCCATACCACATGGCCGTTAACTAAGCCGGAAAGGGGGAGA	155
AGCGGCCGCGACTCTAGAGGAGCTAACTCGACTAAGCGAGTATAAACAGACATTTAGGCTTAGAGCGTTCCCTGTGAAAACGGGGAGGTTGTAAGACATCCGGAGCCATACCACATTGATGGTCGCTAAGCCGGAAAGGGGGAGA	145
AGCGGCCGCGACTCTAGAGGGATCAGCTCGACTAGGCGAGGATAAATAGACTGTTAAGCCTGGAGCGTTGCCCCTTTCGGGGGCAGGTAGTTAAACATCCGGAGCCATACCACATTAAACTGCCCTAAGCCGGAAAGGGGGAGA	144
AGCGGCCGCGACTCTAGAGGAATTCAGTCGTCTAAGCGACTCTAAAAAGGCTTTAAGCTTAGAGCGTTCGCCCATATTGGGCGAGGTTGTAAAGTTTCCGGAGCCATACCACATTGGGCGAAACTAAGCCGGAAAGGGGGAGA	143
AGCGGCCGCGACTCTAGAGGAAAACACTCGACTAAGCGAGAATAAAAAGGCTTTAGGCTTAGAGCGTTCGCCCTTCGGGGCGGGGTAGTATTAACTCCGGAGCCATACCACATGCTGAGTGTCTAAGCCGGAAAGGGGGAGA	142
AGCGGCCGCGACTCTAGAGGGAAAAAGTCGTCTAAGCGACTATAAAAAGCTTTAGGCTTAGAGCGTCCACCCCCTCGGGGTGGGGTAGTAAAGGTTCCGGAGCCATACCACATCATTCAACCCTAAGCCGGAAAGGGGGAGA	142
AGCGGCCGCGACTCTAGAGGGAAAAAGTCGTCTAAGCGACTATAAAAAGGCTTTAGGCTTAGAGCGTCCACCCATTGGGGTGGGGTAGTAAAGTTTCCGGAGCCATACCACATGCTACTTCACTAAGCCGGAAAGGGGGAGA	142
AGCGGCCGCGACTCTAGAGGGAATAACCCGACTAGGCGGGTATAAAAAGACTTCAAGCCTAGTGCGTTGCTCCCCCTGTGGGGGGGGCAGGTAGTTAAACATCCGGAGCCATACCACATCGTTGATGACTAAGCCGGAAAGGGGGAGA	148
AGCGGCCGCGACTCTAGAGGCAATAACCCGACCAAGCGGGTATAAAAAGGCTTTAAGCTTGGAGCGTTGCCCTTTCGGGGGCAGGTAGTAAAACCTCCGGAGCCATACCACATGAGGTGAGACTAAGCCGGAAAGGGGGAGA	142
AGCGGCCGCGACTCTAGAGGGATGCACTCGACCAAGCGAGTATAAAAAGTCTTTAGGCTTGGTGCGTTGCTCCCCCTGTGGGGGCAGGTAGTAAAACATCCGGAGCCATACCACATCCAACTGTCCTAAGCCGGAAAGGGGGAGA	145
AGCGGCCGCGACTCTAGAGGCCCGCGCTCGTCTGAGCGAGTAAAAAACACATTAGGCTCAGAGCGTCCCCCATGCACTAAACTGCGTAGACGCTGGTGTTTGGGGGGGTTGAAAGTTCTCCGGAGCCATACCACATTCCTACCCTCTAAGCCGGAAAGGGGGAGA	165
AGCGGCCGCGACTCTAGAGGCTGACAGTCGTCACGGCGACTCTAAACAGGCTTTAGGCCGTGAGCGTCGCCCCCACAGGGGGCGGGTGGCAATAGTTCCGGAGCCATACCACATAGGCGAAAACTAAGCCGGAAAGGGGGAGA	143
AGCGGCCGCGACTCTAGAGGAATTCAGTCGTCACAGCGACTCTAAACAGGCATTAGGCTGTGAGCGTTCCTCCCACTTCGGGAGGAGGTTGTTTTAATTCCGGAGCCATACCACATGCACATTCACTAAGCCGGAAAGGGGGAGA	145
AGCGGCCGCGACTCTAGAGGTTAAAAGTCGTCACAGCGACTATAAATAGGGCTTTAGGCTGTGAGCGTTGATCCCCCGGTTACAAGGGGATCAGGTGGTCATTAATCCGGAGCCATACCACATGTTGCTAGGCTAAGCCGGAAAGGGGGAGA	152
AGCGGCCGCGACTCTAGAGGTTCCTAGTGGTTGCAGCCACTATAAACAGGGCTTCAAGCTGCAAGCGTTCCCACTGTCAACGGTGGGAGGTAGTCAAAAATCCGGAGCCATACCACATAGGCTTGAGCTAAGCCGGAAAGGGGGAGA	147
AGCGGCCGCGACTCTAGAGGTAATAAGTGGTCATAGCCACTATAAACAGGGCTTTAAGCTATGAGCGTTCCCCGTCAGATTTGACGGGTAGGTAGTCAAAACTCCGGAGCCATACCACATCAGCTGTTGCTAAGCCGGAAAGGGGGAGA	149
AGCGGCCGCGACTCTAGAGGAATAAAGTGGTCATAGCCACTATAAATAGGGCTTTAAGCTATGAGCGTTACCCGTCAAATTTGACGGGTAGGTAGTCATAAATCCGGAGCCATACCACATAGTGAAGTGCTAAGCCGGAAAGGGGGAGA	149
AGCGGCCGCGACTCTAGAGGAATAAAGTGGTCATAGCCACTATAAATAGGGCTTTAAGCTATGAGCGTTACCCGTCAAATTTGACGGGCAGGTAGTCATAAATCCGGAGCCATACCACATTGCAACGAACTAAGCCGGAAAGGGGGAGA	149
AGCGGCCGCGACTCTAGAGGTAATAAGTGGTCATAGCCACTATAAACAGGGCTTTAAGCTATGAGCGTTCCTGCTCTTTAGGGCAGGAGGTAGTCATAAGTCCGGAGCCATACCACATTGATTCCGACTAAGCCGGAAAGGGGGAGA	147
AGCGGCCGCGACTCTAGAGGAAATAAGTGGTCACAGCCACTATAAACAGGGCTTTAAGCTGTGAGCGTTCCCACTCTTACCGGGTGGGAGATAGTCAAAAATCCGGAGCCATACCACATTTTGTGGTGCTAAGCCGGAAAGGGGGAGA	148
AGCGGCCGCGACTCTAGAGGAGATAAGTGGTCACAGCCACTATAAACAGGGCTTTAAGCTGTGAGCGTTCCCACTCTTACTGGGTGGGAGATAGTCAAAAATCCGGAGCCATACCACATCAGTCTTCACTAAGCCGGAAAGGGGGAGA	148
AGCGGCCGCGACTCTAGAGGTATAAAGTGGTCATAGCCACTATAAACAGGGCTTTAAGCTATGAGCGTTCCCACTCTTACAGGGTGGGAGGTAGTCAAAAGTCCGGAGCCATACCACATGGGGTATTGCTAAGCCGGAAAGGGGGAGA	148
AGCGGCCGCGACTCTAGAGGTAATGAGTGGTCATAGCCACTATAAATAGGGCTTTAAGCTATGAGCGTTCCCACTCTTACAGGGTGGGAGGTAGTCAAAAGTCCGGAGCCATACCACATATGCGTGGTCTAAGCCGGAAAGGGGGAGA	148
AGCGGCCGCGACTCTAGAGGTATAAAGTCGTCAGAGCGACTATAAACAGACTTTAGGCGCTGAGCGTTGACCGTTACAAATGGCGGTCAGGTAGTAAAAATTCCGGAGCCATACCACATTCTGCGGTACTAAGCCGGAAAGGGGGAGA	148
AGCGGCCGCGACTCTAGAGGTAACAAGTGGTCGCAGCCACTATAAATAGGGCTTTAAGCTGTGAGCGTTGACCGTCACAACGGCGGTCAGGTAGTCAGAGATCCGGAGCCATACCACATGGAGTAACACTAAGCCGGAAAGGGGGAGA	148
AGCGGCCGCGACTCTAGAGGATAAAAGTGGTCACAGCCACTATAAACAGGGCTTTAAGCTGTGAGCGTTGACCGTCACAACGGCGGTCAGGTAGTCAGAGATCCGGAGCCATACCACATGAACGGATTCTAAGCCGGAAAGGGGGAGA	148
AGCGGCCGCGACTCTAGAGGAGATAAGTGGTCACAGCCACTATAAACAGGGCTTCAGGCTGTGAGCGTTGACCGTCAGAAATGGCGGTCAGGTAGTCAGACATCCGGAGCCATACCACATGTACGACAGCTAAGCCGGAAAGGGGGAGA	149
AGCGGCCGCGACTCTAGAGGATAAAAGTCGTCACAGCGACTATAAAAAGGGCTTTAGGCTGTGAGCGTTGACCGTCAGAAATGGCGGTCAGGTAGTCAGACATCCGGAGCCATACCACATCAGTGAACCCTAAGCCGGAAAGGGGGAGA	149
AGCGGCCGCGACTCTAGAGGATCAAAGTGGTTGCAGCCACGATAAACAGGGCTTTAAGCTGCAAGCGTTGATCGCCGTACCCGGCGGTCAGGTAGTCATATGTCCGGAGCCATACCACATTGGCCTTCTCTAAGCCGGAAAGGGGGAGA	149
AGCGGCCGCGACTCTAGAGGAGAACAGTCGTTTGAGCGACTATAAATAGGACTTTAGGCTCAAAGCGTTCCCATCTACATAAGATGGGAGGTAGTCGGCTATCCGGAGCCATACCACATCCGTAGAACCTAAGCCGGAAAGGGGGAGA	148
AGCGGCCGCGACTCTAGAGGAGAACAGTCGTTTGAGCGACTATAAATAGGACTTTAGGCTCAAAGCGTTCCCATCTACATAAGGTGGGAGGTAGTCGGCTATCCGGAGCCATACCACATCCGTAATGACTAAGCCGGAAAGGGGGAGA	148
AGCGGCCGCGACTCTAGAGGACTAAACTCGATACGGCGAGTATAAATAGGACTTTAAGCCGTAAGCGTTCCCGCCGCAGGGCGGGAGGTAGTCAATCCTCCGGAGCCATACCACATAAAGCGAACCTAAGCCGGAAAGGGGGAGA	145
AGCGGCCGCGACTCTAGAGGCTAAAAGTCGACTAAGCGACTTTAAAAAGGTAATTAGGCTTAGAGCGTTTGACCCCGTTTAAAACGGGGTTGAGGTTTACAAACTTCCGGAGCCATACCACATTGATAAGGGCTAAGCCGGAAAGGGGGAGA	152
AGCGGCCGCGACTCTAGAGGAAAAAAGTGGACTTTGCCACTTTAAAAAGGTAATTAAGCAAAGAGCGTTCAACCTCGTTTAAACGGGGTTGAGGTTTACAAACTTCCGGAGCCATACCACATTGACGAACACTAAGCCGGAAAGGGGGAGA	151
AGCGGCCGCGACTCTAGAGGAAAAAAGTGGACTTTGCCACTAAAAAAAGGTAATTAAGCAAAGAGCGTTTGACCCCGTTTAAACGGGGTTGAGGTTTACAAACTTCCGGAGCCATACCACATTTTACGCGGCTAAGCCGGAAAGGGGGAGA	151
AGCGGCCGCGACTCTAGAGGATGTTAGTGGACTTTGCCACTTAAAAAAGGTAATTAAGCAAAGAGCGTTTGACCCCGTTTAAACGGGGTTAAGGTTTACAAACTTCCGGAGCCATACCACATGCACTTGAGCTAAGCCGGAAAGGGGGAGA	151
AGCGGCCGCGACTCTAGAGGGAACAACCCGACTGGGCGGGTATAAATAGCCGTCAAGCCCAGTGCGTTACCCACTCAAAGAGTGGGTAGGTCGGAAAGCCTCCGGAGCCATACCACATATGTCACGGCTAAGCCGGAAAGGGGGAGA	147
AGCGGCCGCGACTCTAGAGGGAACAACCCGACTGGGCGGGTATAAATAGCCGTCAAGCCCAGTGCGTTACCCACTCTTTGAGTGGGTAGGTCGGAAAGCCTCCGGAGCCATACCACATGTGAAGGACCTAAGCCGGAAAGGGGGAGA	147
AGCGGCCGCGACTCTAGAGGAAATAACTCGACTAGGCGAGTATAAACCGTGTCAAGCCTAGTGCGTTACCCACTCTTTGAGTGGGTAGGTCACAAAATCTCCGGAGCCATACCACATTGCTTACTCCTAAGCCGGAAAGGGGGAGA	146
AGCGGCCGCGACTCTAGAGGATACAACTCGACTAGGCGAGTATAAACCGTGTCAAGCCTAGTGCGTTACCCACTCTTTTGAGTGGGTAGGTCACAAAATCTCCGGAGCCATACCACATCAACCTCTTCTAAGCCGGAAAGGGGGAGA	147
AGCGGCCGCGACTCTAGAGGAAATAACTCGACTAGGCGAGTATAAAGCGTGTTAAGCCTAGTGCGTTACCCACTCAAAAGAGTGGGTAGGTCACAAAATCTCCGGAGCCATACCACATGGTTAAGTCCTAAGCCGGAAAGGGGGAGA	147
AGCGGCCGCGACTCTAGAGGGTAACACTCGACTAGGCGAGTATAAACAGGTGTCAAGCCTAGTGCGTTACCCACTCAAAAAGAGTGGGTAGGTCACATAGATTCCGGAGCCATACCACATTCTCCGTTCCTAAGCCGGAAAGGGGGAGA	149
AGCGGCCGCGACTCTAGAGGCTTAAACTCGACTGGGCGAGTATAAATAGTTGTTAAGCCTAGTGCGTCATTATAAAATGGGTCAACTCAAATCCGGAGCCATACCACATACTAGGTCCCTAAGCCGGAAAGGGGGAGA	138
AGCGGCCGCGACTCTAGAGGTCTAAACTCGACTAGACGAGTATAAATAGTTGTTAAGTCTAGTGCGTTATTATAACATTGTTGTAATAGGTCAAACAATTTCCGGAGCCATACCACATTTGGTGGCACTAAGCCGGAAAGGGGGAGA	147
AGCGGCCGCGACTCTAGAGGATTAAAGTCGACTATGCGACTATAAATAGGCTATTAAGCATAGTGCGTTAAATAAGGTTAGCAAATATCCGGAGCCATACCACATAAAGGTCCACTAAGCCGGAAAGGGGGAGA	134
AGCGGCCGCGACTCTAGAGGTTAAAACTCGACTATGCGAGTATAAAAAGACATTAGGCATAGTGCGTTATAGACCGTATAACAGCGGTCTATAGGTTGTAACATATCCGGAGCCATACCACATTCACGTGACCTAAGCCGGAAAGGGGGAGA	152
AGCGGCCGCGACTCTAGAGGTAAAAACTCGTCTGAGCGAGTATAAACAGGTCATTAAGCTCAGAGCGTTCACCGGGATCATTCGGTGAGGTTGGCACAAGTCCGGAGCCATACCACATCGAACAAGTCTAAGCCGGAAAGGGGGAGA	147
AGCGGCCGCGACTCTAGAGGTAAAAACTCGTCTGAGCGAGTATAAACAGGTCATTAAGCTCAGAGCGTTCACCGGGATCATGCGGTGAGGTTGGCACAAGTCCGGAGCCATACCACATCATAGCCACCTAAGCCGGAAAGGGGGAGA	147
AGCGGCCGCGACTCTAGAGGTAAAAACTCGTCTGAGCGAGTATAAACAGGTCATTAAGCTCAGAGCGTTCACCGGGATCATCCGGTGAGGTTGGCACAAGTCCGGAGCCATACCACATTACATAGCGCTAAGCCGGAAAGGGGGAGA	147
AGCGGCCGCGACTCTAGAGGTAAAAGTTCGTCTGAGCGAACGCAAACAGGCCATTAAGCTCAGAGCGTTCACTGGATTCGTCCAGTGAGATTGGCACAAGTCCGGAGCCATACCACATGTTACCCTCCTAAGCCGGAAAGGGGGAGA	147
AGCGGCCGCGACTCTAGAGGTGAAAGTTCGTCTGAGCGAACGGAAACAGGCCATTAGGCTCAGAGCGTTCACTGGATATGTCCAGTGAGGTTGGCACCACTCCGGAGCCATACCACATACTCAGAGGCTAAGCCGGAAAGGGGGAGA	147
AGCGGCCGCGACTCTAGAGGGTAACCGTCGTCAGGGCGACGTTAAACAGGCCTCAGGCCCTGAGCGTCCCTCGCATCCAGCGAGGGGGTGGCGGTTATTCCGGAGCCATACCACATTTCGTCCAACTAAGCCGGAAAGGGGGAGA	145
AGCGGCCGCGACTCTAGAGGCCGCACGTCGGCCCGGCGACGTAAAACAGGCATTAGGCCGGGGGCGTCCGCCCCTCGTGGGCGGGGGTTGCACATCATCCGGAGCCATACCACATCCATCACTCCTAAGCCGGAAAGGGGGAGA	144
AGCGGCCGCGACTCTAGAGGTAATCAGCCGACCCGGCGGCGTTAAACAGGCATCAGGCCGGGAGCGTCCCGCCCAACCGGGCGGGGTTGCAAGTCATCCGGAGCCATACCACATGCCAATGAGCTAAGCCGGAAAGGGGGAGA	143
AGCGGCCGCGACTCTAGAGGCTTTCAGTCGTTTGAGCGACTATAAATAGGTGTTTGGCTCAAAGCGGGTAACTATATAGTTATGTCACAACAATTCCGGAGCCATACCACATCTAGACGACCTAAGCCGGAAAGGGGGAGA	141
AGCGGCCGCGACTCTAGAGGCGGTAACTCGTTAGGGCGAGTATAAAATAGGCCTTTAGGCCCTAAGCGGCTCTCCAACTGGGAGGCGGGGTATTGCTTCCGGAGCCATACCACATAAGTCCTGACTAAGCCGGAAAGGGGGAGA	144
AGCGGCCGCGACTCTAGAGGAATATAGTCGTTTGAGCAACTTTAAATAGCAGCCTTAAGCTCAAAGCGTTAGAAGGTATAACGGCCTTCTAGGTGGTTAATTATCCGGAGCCATACCACATAGCAAGGTGCTAAGCCGGAAAGGGGGAGA	150
AGCGGCCGCGACTCTAGAGGAACTAAGTGGTTTGAGCCACTATAAATAGCACGTTAAGCTCAAAGCGTCCAAGGAGTTATCCGTTGGGGTCGTACAATATCCGGAGCCATACCACATCATTTACGCCTAAGCCGGAAAGGGGGAGA	146
AGCGGCCGCGACTCTAGAGGTACGCCGTCGTCGTGGCGACGTTAAACAGGTTCTTAAGCCACGAGCGTCACGAATTTTCGTGGGTGAATTACTATCCGGAGCCATACCACATCGACAGTACCTAAGCCGGAAAGGGGGAGA	141
AGCGGCCGCGACTCTAGAGGATGAACGTCGTTGCAGCGACGAAAAATAGGTTCTTAGGCTGCAAGCGTCACGAATTTTCGTGGGTGAACATTAATCCGGAGCCATACCACATTAACGAGGTCTAAGCCGGAAAGGGGGAGA	141
AGCGGCCGCGACTCTAGAGGAATAAAGTCGTTGCACTGGCTTAAAATAGGTTCTTAAGGTGCAAGCGTTGACCGCCCTCGCGGCGGTCAGGTGAACAAACATCCGGAGCCATACCACATTCATCGGAACTAAGCCGGAAAGGGGGAGA	148
AGCGGCCGCGACTCTAGAGGCATAAAGTCGTTGCACCGGCTTAAAATAGGTTCTTAAGGTGCAAGCGTTGACCGCCATTGCGGCGGTCAGGTGAACAAACATCCGGAGCCATACCACATTCCCAATTCCTAAGCCGGAAAGGGGGAGA	148
AGCGGCCGCGACTCTAGAGGGCCGCGGGCGTCTGGACGCCCTAAAACCGCGTTAAGTCCAGAGGCGGGCGACCGGGCGTATCGGTGCCGTCGTGATCTCTCCGGAGCCATACCACATAACAAACCGCTAAGCCGGAAAGGGGGAGA	146
AGCGGCCGCGACTCTAGAGGGCCGCGGGCGTCTGGACGCCTAAAACCGCGTTAAGTCCAGAGCGGGCACCGGGCGTATCGGTGCCGTCGTGATCTCTCCGGAGCCATACCACATTGTGATCGCCTAAGCCGGAAAGGGGGAGA	143
AGCGGCCGCGACTCTAGAGGACCACGGACGGCAGAGCGTCCCTAAATAGGCGTTAAGCTCTGCGCGGGCGCCGACCACCGGGCGCCGTCGTTCTTCTTCCGGAGCCATACCACATACGACGAGACTAAGCCGGAAAGGGGGAGA	144
AGCGGCCGCGACTCTAGAGGAGAAAACTCGTCTGGGCGAGTATAAATAGTAATTAGGCCCAGAGCGTCCCGGCAGCTGCCGGGGGTTTAGCAGTTTCCGGAGCCATACCACATTACTCGGATCTAAGCCGGAAAGGGGGAGA	142
AGCGGCCGCGACTCTAGAGGAGAAAACTCGTCTGGGCGAGTATAAATAGTAATTAGGCCCAGAGCGTCTTGGTCGGTATTACCGGCTGGGGGTTTAGCAGTTTCCGGAGCCATACCACATTTACGGGGACTAAGCCGGAAAGGGGGAGA	149
AGCGGCCGCGACTCTAGAGGAGAAAACTCGTCTGGGCGAGTATAAATAGTAATTAGGCCCAGAGCGGCAGGGTTCTTCCCTGCGTTTAGCAGTTTCCGGAGCCATACCACATATCTCGTAGCTAAGCCGGAAAGGGGGAGA	141
AGCGGCCGCGACTCTAGAGGAGAAAACTCGTCTGGGCGAGTATAAATAGGCTTTAGGCCCAGAGCGTCCCGGCAGCTGCCGGGGGTAGTCAAAAATCCGGAGCCATACCACATGTCGCTTACCTAAGCCGGAAAGGGGGAGA	142
AGCGGCCGCGACTCTAGAGGAGAAAACTCGTCTGGGCGAGTATAAATAGGCTTTAGGCCCAGAGCGTCTTGGTCGGTATTACCGGCTGGGGGTAGTCAAAAATCCGGAGCCATACCACATGGTTGACGTCTAAGCCGGAAAGGGGGAGA	149
AGCGGCCGCGACTCTAGAGGAGAAAACTCGTCTGGGCGAGTATAAATAGGCTTTAGGCCCAGAGCGGCAGGGTTCTTCCCTGCGTAGTCAAAAATCCGGAGCCATACCACATCCGAAGCAACTAAGCCGGAAAGGGGGAGA	141
AGCGGCCGCGACTCTAGAGGAGAAAACTCGTCTGGGCGAGTATAAATAGACATTAGGCCCAGAGCGTCCCGGCAGCTGCCGGGGGTTGTATAACTTCCGGAGCCATACCACATGTTACGAAGCTAAGCCGGAAAGGGGGAGA	142
AGCGGCCGCGACTCTAGAGGAGAAAACTCGTCTGGGCGAGTATAAATAGACATTAGGCCCAGAGCGTCTTGGTCGGTATTACCGGCTGGGGGTTGTATAACTTCCGGAGCCATACCACATATGCGCATTCTAAGCCGGAAAGGGGGAGA	149
AGCGGCCGCGACTCTAGAGGAGAAAACTCGTCTGGGCGAGTATAAATAGACATTAGGCCCAGAGCGGCAGGGTTCTTCCCTGCGTTGTATAACTTCCGGAGCCATACCACATGGGCGAATTCTAAGCCGGAAAGGGGGAGA	141
AGCGGCCGCGACTCTAGAGGAGAAAACTCGTCTGGGCGAGTATAAATAGGTGTTAGGCCCAGAGCGTCCCGGCAGCTGCCGGGGGTCACATTAATTCCGGAGCCATACCACATGTCCTACTGCTAAGCCGGAAAGGGGGAGA	142
AGCGGCCGCGACTCTAGAGGAGAAAACTCGTCTGGGCGAGTATAAATAGGTGTTAGGCCCAGAGCGTCTTGGTCGGTATTACCGGCTGGGGGTCACATTAATTCCGGAGCCATACCACATGTAAGGAACCTAAGCCGGAAAGGGGGAGA	149
AGCGGCCGCGACTCTAGAGGAGAAAACTCGTCTGGGCGAGTATAAATAGGTGTTAGGCCCAGAGCGGCAGGGTTCTTCCCTGCGTCACATTAATTCCGGAGCCATACCACATGGTGACACACTAAGCCGGAAAGGGGGAGA	141
AGCGGCCGCGACTCTAGAGGAGAAAACTCGTCTGGGCGAGTATAAATAGTTATTAGGCCCAGAGCGTCCCGGCAGCTGCCGGGGGTTAACTAATATCCGGAGCCATACCACATCTTGTCAAGCTAAGCCGGAAAGGGGGAGA	142
AGCGGCCGCGACTCTAGAGGAGAAAACTCGTCTGGGCGAGTATAAATAGTTATTAGGCCCAGAGCGTCTTGGTCGGTATTACCGGCTGGGGGTTAACTAATATCCGGAGCCATACCACATCCAAACTTCCTAAGCCGGAAAGGGGGAGA	149
AGCGGCCGCGACTCTAGAGGAGAAAACTCGTCTGGGCGAGTATAAATAGTTATTAGGCCCAGAGCGGCAGGGTTCTTCCCTGCGTTAACTAATATCCGGAGCCATACCACATGTAGAGGTACTAAGCCGGAAAGGGGGAGA	141
AGCGGCCGCGACTCTAGAGGAGAAAACTCGTCTGGGCGAGTATAAATAGGTAATTAGGCCCAGAGCGTCCCGGCAGCTGCCGGGGGTTTAGCAGTTTCCGGAGCCATACCACATCGGAATTACCTAAGCCGGAAAGGGGGAGA	143
AGCGGCCGCGACTCTAGAGGAGAAAACTCGTCTGGGCGAGTATAAATAGGTAATTAGGCCCAGAGCGTCTTGGTCGGTATTACCGGCTGGGGGTTTAGCAGTTTCCGGAGCCATACCACATAGCCCAATACTAAGCCGGAAAGGGGGAGA	150
AGCGGCCGCGACTCTAGAGGAGAAAACTCGTCTGGGCGAGTATAAATAGGTAATTAGGCCCAGAGCGGCAGGGTTCTTCCCTGCGTTTAGCAGTTTCCGGAGCCATACCACATCTAGCTCCTCTAAGCCGGAAAGGGGGAGA	142
AGCGGCCGCGACTCTAGAGGAGAAAACTCGTCTGGGCGAGTATAAATAGGGCTTTAGGCCCAGAGCGTCCCGGCAGCTGCCGGGGGTAGTCAAAAATCCGGAGCCATACCACATATCCGATGCCTAAGCCGGAAAGGGGGAGA	143
AGCGGCCGCGACTCTAGAGGAGAAAACTCGTCTGGGCGAGTATAAATAGGGCTTTAGGCCCAGAGCGTCTTGGTCGGTATTACCGGCTGGGGGTAGTCAAAAATCCGGAGCCATACCACATCGCATGCTACTAAGCCGGAAAGGGGGAGA	150
AGCGGCCGCGACTCTAGAGGAGAAAACTCGTCTGGGCGAGTATAAATAGGGCTTTAGGCCCAGAGCGGCAGGGTTCTTCCCTGCGTAGTCAAAAATCCGGAGCCATACCACATCGATAGACACTAAGCCGGAAAGGGGGAGA	142
AGCGGCCGCGACTCTAGAGGAGAAAACTCGTCTGGGCGAGTATAAATAGGACATTAGGCCCAGAGCGTCCCGGCAGCTGCCGGGGGTTGTATAACTTCCGGAGCCATACCACATTGGTGAGCTCTAAGCCGGAAAGGGGGAGA	143
AGCGGCCGCGACTCTAGAGGAGAAAACTCGTCTGGGCGAGTATAAATAGGACATTAGGCCCAGAGCGTCTTGGTCGGTATTACCGGCTGGGGGTTGTATAACTTCCGGAGCCATACCACATTAACCACTCCTAAGCCGGAAAGGGGGAGA	150
AGCGGCCGCGACTCTAGAGGAGAAAACTCGTCTGGGCGAGTATAAATAGGACATTAGGCCCAGAGCGGCAGGGTTCTTCCCTGCGTTGTATAACTTCCGGAGCCATACCACATCTGGACAACCTAAGCCGGAAAGGGGGAGA	142
AGCGGCCGCGACTCTAGAGGAGAAAACTCGTCTGGGCGAGTATAAATAGGGTGTTAGGCCCAGAGCGTCCCGGCAGCTGCCGGGGGTCACATTAATTCCGGAGCCATACCACATCCTTACGTACTAAGCCGGAAAGGGGGAGA	143
AGCGGCCGCGACTCTAGAGGAGAAAACTCGTCTGGGCGAGTATAAATAGGGTGTTAGGCCCAGAGCGTCTTGGTCGGTATTACCGGCTGGGGGTCACATTAATTCCGGAGCCATACCACATGGCCAGATACTAAGCCGGAAAGGGGGAGA	150
AGCGGCCGCGACTCTAGAGGAGAAAACTCGTCTGGGCGAGTATAAATAGGGTGTTAGGCCCAGAGCGGCAGGGTTCTTCCCTGCGTCACATTAATTCCGGAGCCATACCACATTTTGCCCTTCTAAGCCGGAAAGGGGGAGA	142
AGCGGCCGCGACTCTAGAGGAGAAAACTCGTCTGGGCGAGTATAAATAGGTTATTAGGCCCAGAGCGTCCCGGCAGCTGCCGGGGGTTAACTAATATCCGGAGCCATACCACATCGGAAGTTTCTAAGCCGGAAAGGGGGAGA	143
AGCGGCCGCGACTCTAGAGGAGAAAACTCGTCTGGGCGAGTATAAATAGGTTATTAGGCCCAGAGCGTCTTGGTCGGTATTACCGGCTGGGGGTTAACTAATATCCGGAGCCATACCACATACCGTTTGACTAAGCCGGAAAGGGGGAGA	150
AGCGGCCGCGACTCTAGAGGAGAAAACTCGTCTGGGCGAGTATAAATAGGTTATTAGGCCCAGAGCGGCAGGGTTCTTCCCTGCGTTAACTAATATCCGGAGCCATACCACATGGTGCATTACTAAGCCGGAAAGGGGGAGA	142
AGCGGCCGCGACTCTAGAGGAGAAAACTCGTCTGGGCGAGTGTAAATAGTAATTAGGCCCAGAGCGTCCCGGCAGCTGCCGGGGGTTTAGCAGTTTCCGGAGCCATACCACATGGAACTGAACTAAGCCGGAAAGGGGGAGA	142
AGCGGCCGCGACTCTAGAGGAGAAAACTCGTCTGGGCGAGTGTAAATAGTAATTAGGCCCAGAGCGTCTTGGTCGGTATTACCGGCTGGGGGTTTAGCAGTTTCCGGAGCCATACCACATAGAACTGGCCTAAGCCGGAAAGGGGGAGA	149
AGCGGCCGCGACTCTAGAGGAGAAAACTCGTCTGGGCGAGTGTAAATAGTAATTAGGCCCAGAGCGGCAGGGTTCTTCCCTGCGTTTAGCAGTTTCCGGAGCCATACCACATGTAGCACTCCTAAGCCGGAAAGGGGGAGA	141
AGCGGCCGCGACTCTAGAGGAGAAAACTCGTCTGGGCGAGTGTAAATAGGCTTTAGGCCCAGAGCGTCCCGGCAGCTGCCGGGGGTAGTCAAAAATCCGGAGCCATACCACATGGTTTCTGCCTAAGCCGGAAAGGGGGAGA	142
AGCGGCCGCGACTCTAGAGGAGAAAACTCGTCTGGGCGAGTGTAAATAGGCTTTAGGCCCAGAGCGTCTTGGTCGGTATTACCGGCTGGGGGTAGTCAAAAATCCGGAGCCATACCACATGCAGCATCTCTAAGCCGGAAAGGGGGAGA	149
AGCGGCCGCGACTCTAGAGGAGAAAACTCGTCTGGGCGAGTGTAAATAGGCTTTAGGCCCAGAGCGGCAGGGTTCTTCCCTGCGTAGTCAAAAATCCGGAGCCATACCACATATCACGGCTCTAAGCCGGAAAGGGGGAGA	141
AGCGGCCGCGACTCTAGAGGAGAAAACTCGTCTGGGCGAGTGTAAATAGACATTAGGCCCAGAGCGTCCCGGCAGCTGCCGGGGGTTGTATAACTTCCGGAGCCATACCACATGCCAAAACGCTAAGCCGGAAAGGGGGAGA	142
AGCGGCCGCGACTCTAGAGGAGAAAACTCGTCTGGGCGAGTGTAAATAGACATTAGGCCCAGAGCGTCTTGGTCGGTATTACCGGCTGGGGGTTGTATAACTTCCGGAGCCATACCACATACATACCCGCTAAGCCGGAAAGGGGGAGA	149
AGCGGCCGCGACTCTAGAGGAGAAAACTCGTCTGGGCGAGTGTAAATAGACATTAGGCCCAGAGCGGCAGGGTTCTTCCCTGCGTTGTATAACTTCCGGAGCCATACCACATGAAGACCACCTAAGCCGGAAAGGGGGAGA	141
AGCGGCCGCGACTCTAGAGGAGAAAACTCGTCTGGGCGAGTGTAAATAGGTGTTAGGCCCAGAGCGTCCCGGCAGCTGCCGGGGGTCACATTAATTCCGGAGCCATACCACATGTCACGATACTAAGCCGGAAAGGGGGAGA	142
AGCGGCCGCGACTCTAGAGGAGAAAACTCGTCTGGGCGAGTGTAAATAGGTGTTAGGCCCAGAGCGTCTTGGTCGGTATTACCGGCTGGGGGTCACATTAATTCCGGAGCCATACCACATTCCACATCGCTAAGCCGGAAAGGGGGAGA	149
AGCGGCCGCGACTCTAGAGGAGAAAACTCGTCTGGGCGAGTGTAAATAGGTGTTAGGCCCAGAGCGGCAGGGTTCTTCCCTGCGTCACATTAATTCCGGAGCCATACCACATCGTGGTATGCTAAGCCGGAAAGGGGGAGA	141
AGCGGCCGCGACTCTAGAGGAGAAAACTCGTCTGGGCGAGTGTAAATAGTTATTAGGCCCAGAGCGTCCCGGCAGCTGCCGGGGGTTAACTAATATCCGGAGCCATACCACATGCCGGTTTTCTAAGCCGGAAAGGGGGAGA	142
AGCGGCCGCGACTCTAGAGGAGAAAACTCGTCTGGGCGAGTGTAAATAGTTATTAGGCCCAGAGCGTCTTGGTCGGTATTACCGGCTGGGGGTTAACTAATATCCGGAGCCATACCACATCATCGCAGACTAAGCCGGAAAGGGGGAGA	149
AGCGGCCGCGACTCTAGAGGAGAAAACTCGTCTGGGCGAGTGTAAATAGTTATTAGGCCCAGAGCGGCAGGGTTCTTCCCTGCGTTAACTAATATCCGGAGCCATACCACATGAGTGCGATCTAAGCCGGAAAGGGGGAGA	141
AGCGGCCGCGACTCTAGAGGAGAAAACTCGTCTGGGCGAGTTTAAATAGTAATTAGGCCCAGAGCGTCCCGGCAGCTGCCGGGGGTTTAGCAGTTTCCGGAGCCATACCACATCAATTCCGCCTAAGCCGGAAAGGGGGAGA	142
AGCGGCCGCGACTCTAGAGGAGAAAACTCGTCTGGGCGAGTTTAAATAGTAATTAGGCCCAGAGCGTCTTGGTCGGTATTACCGGCTGGGGGTTTAGCAGTTTCCGGAGCCATACCACATACAGACTCCCTAAGCCGGAAAGGGGGAGA	149
AGCGGCCGCGACTCTAGAGGAGAAAACTCGTCTGGGCGAGTTTAAATAGTAATTAGGCCCAGAGCGGCAGGGTTCTTCCCTGCGTTTAGCAGTTTCCGGAGCCATACCACATCACTCATGCCTAAGCCGGAAAGGGGGAGA	141
AGCGGCCGCGACTCTAGAGGAGAAAACTCGTCTGGGCGAGTTTAAATAGGCTTTAGGCCCAGAGCGTCCCGGCAGCTGCCGGGGGTAGTCAAAAATCCGGAGCCATACCACATGTCTCATCACTAAGCCGGAAAGGGGGAGA	142
AGCGGCCGCGACTCTAGAGGAGAAAACTCGTCTGGGCGAGTTTAAATAGGCTTTAGGCCCAGAGCGTCTTGGTCGGTATTACCGGCTGGGGGTAGTCAAAAATCCGGAGCCATACCACATCGAGGGTTACTAAGCCGGAAAGGGGGAGA	149
AGCGGCCGCGACTCTAGAGGAGAAAACTCGTCTGGGCGAGTTTAAATAGGCTTTAGGCCCAGAGCGGCAGGGTTCTTCCCTGCGTAGTCAAAAATCCGGAGCCATACCACATAAACGACGCCTAAGCCGGAAAGGGGGAGA	141
AGCGGCCGCGACTCTAGAGGAGAAAACTCGTCTGGGCGAGTTTAAATAGACATTAGGCCCAGAGCGTCCCGGCAGCTGCCGGGGGTTGTATAACTTCCGGAGCCATACCACATCGAGACTCACTAAGCCGGAAAGGGGGAGA	142
AGCGGCCGCGACTCTAGAGGAGAAAACTCGTCTGGGCGAGTTTAAATAGACATTAGGCCCAGAGCGTCTTGGTCGGTATTACCGGCTGGGGGTTGTATAACTTCCGGAGCCATACCACATCTGGATACACTAAGCCGGAAAGGGGGAGA	149
AGCGGCCGCGACTCTAGAGGAGAAAACTCGTCTGGGCGAGTTTAAATAGACATTAGGCCCAGAGCGGCAGGGTTCTTCCCTGCGTTGTATAACTTCCGGAGCCATACCACATGAACAAGCCCTAAGCCGGAAAGGGGGAGA	141
AGCGGCCGCGACTCTAGAGGAGAAAACTCGTCTGGGCGAGTTTAAATAGGTGTTAGGCCCAGAGCGTCCCGGCAGCTGCCGGGGGTCACATTAATTCCGGAGCCATACCACATTTGGCGTCACTAAGCCGGAAAGGGGGAGA	142
AGCGGCCGCGACTCTAGAGGAGAAAACTCGTCTGGGCGAGTTTAAATAGGTGTTAGGCCCAGAGCGTCTTGGTCGGTATTACCGGCTGGGGGTCACATTAATTCCGGAGCCATACCACATACCATAGGGCTAAGCCGGAAAGGGGGAGA	149
AGCGGCCGCGACTCTAGAGGAGAAAACTCGTCTGGGCGAGTTTAAATAGGTGTTAGGCCCAGAGCGGCAGGGTTCTTCCCTGCGTCACATTAATTCCGGAGCCATACCACATATGCGAGATCTAAGCCGGAAAGGGGGAGA	141
AGCGGCCGCGACTCTAGAGGAGAAAACTCGTCTGGGCGAGTTTAAATAGTTATTAGGCCCAGAGCGTCCCGGCAGCTGCCGGGGGTTAACTAATATCCGGAGCCATACCACATTTTGTCCGTCTAAGCCGGAAAGGGGGAGA	142
AGCGGCCGCGACTCTAGAGGAGAAAACTCGTCTGGGCGAGTTTAAATAGTTATTAGGCCCAGAGCGTCTTGGTCGGTATTACCGGCTGGGGGTTAACTAATATCCGGAGCCATACCACATTTTCCTACCCTAAGCCGGAAAGGGGGAGA	149
AGCGGCCGCGACTCTAGAGGAGAAAACTCGTCTGGGCGAGTTTAAATAGTTATTAGGCCCAGAGCGGCAGGGTTCTTCCCTGCGTTAACTAATATCCGGAGCCATACCACATGCTTCGTTTCTAAGCCGGAAAGGGGGAGA	141
AGCGGCCGCGACTCTAGAGGAGAAAACTCGTCTGGGCGAGTATAAACGTAATTAGGCCCAGAGCGTCCCGGCAGCTGCCGGGGGTTTAGCAGTTTCCGGAGCCATACCACATTTCGCCTAACTAAGCCGGAAAGGGGGAGA	141
AGCGGCCGCGACTCTAGAGGAGAAAACTCGTCTGGGCGAGTATAAACGTAATTAGGCCCAGAGCGTCTTGGTCGGTATTACCGGCTGGGGGTTTAGCAGTTTCCGGAGCCATACCACATGAAGTCGACCTAAGCCGGAAAGGGGGAGA	148
AGCGGCCGCGACTCTAGAGGAGAAAACTCGTCTGGGCGAGTATAAACGTAATTAGGCCCAGAGCGGCAGGGTTCTTCCCTGCGTTTAGCAGTTTCCGGAGCCATACCACATTGCTAGTTCCTAAGCCGGAAAGGGGGAGA	140
AGCGGCCGCGACTCTAGAGGAGAAAACTCGTCTGGGCGAGTATAAACGGCTTTAGGCCCAGAGCGTCCCGGCAGCTGCCGGGGGTAGTCAAAAATCCGGAGCCATACCACATTCGCCTGAACTAAGCCGGAAAGGGGGAGA	141
AGCGGCCGCGACTCTAGAGGAGAAAACTCGTCTGGGCGAGTATAAACGGCTTTAGGCCCAGAGCGTCTTGGTCGGTATTACCGGCTGGGGGTAGTCAAAAATCCGGAGCCATACCACATCCTACAGGTCTAAGCCGGAAAGGGGGAGA	148
AGCGGCCGCGACTCTAGAGGAGAAAACTCGTCTGGGCGAGTATAAACGGCTTTAGGCCCAGAGCGGCAGGGTTCTTCCCTGCGTAGTCAAAAATCCGGAGCCATACCACATTGCGAATCACTAAGCCGGAAAGGGGGAGA	140
AGCGGCCGCGACTCTAGAGGAGAAAACTCGTCTGGGCGAGTATAAACGACATTAGGCCCAGAGCGTCCCGGCAGCTGCCGGGGGTTGTATAACTTCCGGAGCCATACCACATTGTCTCATCCTAAGCCGGAAAGGGGGAGA	141
AGCGGCCGCGACTCTAGAGGAGAAAACTCGTCTGGGCGAGTATAAACGACATTAGGCCCAGAGCGTCTTGGTCGGTATTACCGGCTGGGGGTTGTATAACTTCCGGAGCCATACCACATCCCTATAACCTAAGCCGGAAAGGGGGAGA	148
AGCGGCCGCGACTCTAGAGGAGAAAACTCGTCTGGGCGAGTATAAACGACATTAGGCCCAGAGCGGCAGGGTTCTTCCCTGCGTTGTATAACTTCCGGAGCCATACCACATAGGAGACGTCTAAGCCGGAAAGGGGGAGA	140
AGCGGCCGCGACTCTAGAGGAGAAAACTCGTCTGGGCGAGTATAAACGGTGTTAGGCCCAGAGCGTCCCGGCAGCTGCCGGGGGTCACATTAATTCCGGAGCCATACCACATAGAACCTGCCTAAGCCGGAAAGGGGGAGA	141
AGCGGCCGCGACTCTAGAGGAGAAAACTCGTCTGGGCGAGTATAAACGGTGTTAGGCCCAGAGCGTCTTGGTCGGTATTACCGGCTGGGGGTCACATTAATTCCGGAGCCATACCACATCCTGCGTTTCTAAGCCGGAAAGGGGGAGA	148
AGCGGCCGCGACTCTAGAGGAGAAAACTCGTCTGGGCGAGTATAAACGGTGTTAGGCCCAGAGCGGCAGGGTTCTTCCCTGCGTCACATTAATTCCGGAGCCATACCACATTTACGGGCTCTAAGCCGGAAAGGGGGAGA	140
AGCGGCCGCGACTCTAGAGGAGAAAACTCGTCTGGGCGAGTATAAACGTTATTAGGCCCAGAGCGTCCCGGCAGCTGCCGGGGGTTAACTAATATCCGGAGCCATACCACATGTTCTCTGCCTAAGCCGGAAAGGGGGAGA	141
AGCGGCCGCGACTCTAGAGGAGAAAACTCGTCTGGGCGAGTATAAACGTTATTAGGCCCAGAGCGTCTTGGTCGGTATTACCGGCTGGGGGTTAACTAATATCCGGAGCCATACCACATACTGCACGTCTAAGCCGGAAAGGGGGAGA	148
AGCGGCCGCGACTCTAGAGGAGAAAACTCGTCTGGGCGAGTATAAACGTTATTAGGCCCAGAGCGGCAGGGTTCTTCCCTGCGTTAACTAATATCCGGAGCCATACCACATCTCCATTGCCTAAGCCGGAAAGGGGGAGA	140
AGCGGCCGCGACTCTAGAGGAGAAAACTCGTCTGAGCGAGTATAAATAGTAATTAAGCTCAGAGCGTCCCGGCAGCTGCCGGGGGTTTAGCAGTTTCCGGAGCCATACCACATTATCGGCCTCTAAGCCGGAAAGGGGGAGA	142
AGCGGCCGCGACTCTAGAGGAGAAAACTCGTCTGAGCGAGTATAAATAGTAATTAAGCTCAGAGCGTCTTGGTCGGTATTACCGGCTGGGGGTTTAGCAGTTTCCGGAGCCATACCACATGTCCCAAGTCTAAGCCGGAAAGGGGGAGA	149
AGCGGCCGCGACTCTAGAGGAGAAAACTCGTCTGAGCGAGTATAAATAGTAATTAAGCTCAGAGCGGCAGGGTTCTTCCCTGCGTTTAGCAGTTTCCGGAGCCATACCACATATGCTCTGCCTAAGCCGGAAAGGGGGAGA	141
AGCGGCCGCGACTCTAGAGGAGAAAACTCGTCTGAGCGAGTATAAATAGGCTTTAAGCTCAGAGCGTCCCGGCAGCTGCCGGGGGTAGTCAAAAATCCGGAGCCATACCACATGTACCATGTCTAAGCCGGAAAGGGGGAGA	142
AGCGGCCGCGACTCTAGAGGAGAAAACTCGTCTGAGCGAGTATAAATAGGCTTTAAGCTCAGAGCGTCTTGGTCGGTATTACCGGCTGGGGGTAGTCAAAAATCCGGAGCCATACCACATCCTGATGGTCTAAGCCGGAAAGGGGGAGA	149
AGCGGCCGCGACTCTAGAGGAGAAAACTCGTCTGAGCGAGTATAAATAGGCTTTAAGCTCAGAGCGGCAGGGTTCTTCCCTGCGTAGTCAAAAATCCGGAGCCATACCACATGGACCGAATCTAAGCCGGAAAGGGGGAGA	141
AGCGGCCGCGACTCTAGAGGAGAAAACTCGTCTGAGCGAGTATAAATAGACATTAAGCTCAGAGCGTCCCGGCAGCTGCCGGGGGTTGTATAACTTCCGGAGCCATACCACATGTGTTGTCTCTAAGCCGGAAAGGGGGAGA	142
AGCGGCCGCGACTCTAGAGGAGAAAACTCGTCTGAGCGAGTATAAATAGACATTAAGCTCAGAGCGTCTTGGTCGGTATTACCGGCTGGGGGTTGTATAACTTCCGGAGCCATACCACATAACCGGTATCTAAGCCGGAAAGGGGGAGA	149
AGCGGCCGCGACTCTAGAGGAGAAAACTCGTCTGAGCGAGTATAAATAGACATTAAGCTCAGAGCGGCAGGGTTCTTCCCTGCGTTGTATAACTTCCGGAGCCATACCACATGCTCCGAAACTAAGCCGGAAAGGGGGAGA	141
AGCGGCCGCGACTCTAGAGGAGAAAACTCGTCTGAGCGAGTATAAATAGGTGTTAAGCTCAGAGCGTCCCGGCAGCTGCCGGGGGTCACATTAATTCCGGAGCCATACCACATTCTACTCGTCTAAGCCGGAAAGGGGGAGA	142
AGCGGCCGCGACTCTAGAGGAGAAAACTCGTCTGAGCGAGTATAAATAGGTGTTAAGCTCAGAGCGTCTTGGTCGGTATTACCGGCTGGGGGTCACATTAATTCCGGAGCCATACCACATAGTACCCCTCTAAGCCGGAAAGGGGGAGA	149
AGCGGCCGCGACTCTAGAGGAGAAAACTCGTCTGAGCGAGTATAAATAGGTGTTAAGCTCAGAGCGGCAGGGTTCTTCCCTGCGTCACATTAATTCCGGAGCCATACCACATCATCGGATACTAAGCCGGAAAGGGGGAGA	141
AGCGGCCGCGACTCTAGAGGAGAAAACTCGTCTGAGCGAGTATAAATAGTTATTAAGCTCAGAGCGTCCCGGCAGCTGCCGGGGGTTAACTAATATCCGGAGCCATACCACATCATTAGCGGCTAAGCCGGAAAGGGGGAGA	142
AGCGGCCGCGACTCTAGAGGAGAAAACTCGTCTGAGCGAGTATAAATAGTTATTAAGCTCAGAGCGTCTTGGTCGGTATTACCGGCTGGGGGTTAACTAATATCCGGAGCCATACCACATTCCGACTAACTAAGCCGGAAAGGGGGAGA	149
AGCGGCCGCGACTCTAGAGGAGAAAACTCGTCTGAGCGAGTATAAATAGTTATTAAGCTCAGAGCGGCAGGGTTCTTCCCTGCGTTAACTAATATCCGGAGCCATACCACATCCCTGAATGCTAAGCCGGAAAGGGGGAGA	141
AGCGGCCGCGACTCTAGAGGAGAAAACTCGTCTGAGCGAGTATAAATAGGTAATTAAGCTCAGAGCGTCCCGGCAGCTGCCGGGGGTTTAGCAGTTTCCGGAGCCATACCACATGCAACTACCCTAAGCCGGAAAGGGGGAGA	143
AGCGGCCGCGACTCTAGAGGAGAAAACTCGTCTGAGCGAGTATAAATAGGTAATTAAGCTCAGAGCGTCTTGGTCGGTATTACCGGCTGGGGGTTTAGCAGTTTCCGGAGCCATACCACATGGTGCTAAGCTAAGCCGGAAAGGGGGAGA	150
AGCGGCCGCGACTCTAGAGGAGAAAACTCGTCTGAGCGAGTATAAATAGGTAATTAAGCTCAGAGCGGCAGGGTTCTTCCCTGCGTTTAGCAGTTTCCGGAGCCATACCACATACTCCCGAACTAAGCCGGAAAGGGGGAGA	142
AGCGGCCGCGACTCTAGAGGAGAAAACTCGTCTGAGCGAGTATAAATAGGGCTTTAAGCTCAGAGCGTCCCGGCAGCTGCCGGGGGTAGTCAAAAATCCGGAGCCATACCACATACTGATCCACTAAGCCGGAAAGGGGGAGA	143
AGCGGCCGCGACTCTAGAGGAGAAAACTCGTCTGAGCGAGTATAAATAGGGCTTTAAGCTCAGAGCGTCTTGGTCGGTATTACCGGCTGGGGGTAGTCAAAAATCCGGAGCCATACCACATAGCAGGTGTCTAAGCCGGAAAGGGGGAGA	150
AGCGGCCGCGACTCTAGAGGAGAAAACTCGTCTGAGCGAGTATAAATAGGGCTTTAAGCTCAGAGCGGCAGGGTTCTTCCCTGCGTAGTCAAAAATCCGGAGCCATACCACATCGATCATTCCTAAGCCGGAAAGGGGGAGA	142
AGCGGCCGCGACTCTAGAGGAGAAAACTCGTCTGAGCGAGTATAAATAGGACATTAAGCTCAGAGCGTCCCGGCAGCTGCCGGGGGTTGTATAACTTCCGGAGCCATACCACATTATCCGGAGCTAAGCCGGAAAGGGGGAGA	143
AGCGGCCGCGACTCTAGAGGAGAAAACTCGTCTGAGCGAGTATAAATAGGACATTAAGCTCAGAGCGTCTTGGTCGGTATTACCGGCTGGGGGTTGTATAACTTCCGGAGCCATACCACATTGACAGGATCTAAGCCGGAAAGGGGGAGA	150
AGCGGCCGCGACTCTAGAGGAGAAAACTCGTCTGAGCGAGTATAAATAGGACATTAAGCTCAGAGCGGCAGGGTTCTTCCCTGCGTTGTATAACTTCCGGAGCCATACCACATGCGCAGTAACTAAGCCGGAAAGGGGGAGA	142
AGCGGCCGCGACTCTAGAGGAGAAAACTCGTCTGAGCGAGTATAAATAGGGTGTTAAGCTCAGAGCGTCCCGGCAGCTGCCGGGGGTCACATTAATTCCGGAGCCATACCACATGCACAGAGTCTAAGCCGGAAAGGGGGAGA	143
AGCGGCCGCGACTCTAGAGGAGAAAACTCGTCTGAGCGAGTATAAATAGGGTGTTAAGCTCAGAGCGTCTTGGTCGGTATTACCGGCTGGGGGTCACATTAATTCCGGAGCCATACCACATGATGTGGTGCTAAGCCGGAAAGGGGGAGA	150
AGCGGCCGCGACTCTAGAGGAGAAAACTCGTCTGAGCGAGTATAAATAGGGTGTTAAGCTCAGAGCGGCAGGGTTCTTCCCTGCGTCACATTAATTCCGGAGCCATACCACATTTGAGTCACCTAAGCCGGAAAGGGGGAGA	142
AGCGGCCGCGACTCTAGAGGAGAAAACTCGTCTGAGCGAGTATAAATAGGTTATTAAGCTCAGAGCGTCCCGGCAGCTGCCGGGGGTTAACTAATATCCGGAGCCATACCACATCGACAAAGACTAAGCCGGAAAGGGGGAGA	143
AGCGGCCGCGACTCTAGAGGAGAAAACTCGTCTGAGCGAGTATAAATAGGTTATTAAGCTCAGAGCGTCTTGGTCGGTATTACCGGCTGGGGGTTAACTAATATCCGGAGCCATACCACATGTATGACCGCTAAGCCGGAAAGGGGGAGA	150
AGCGGCCGCGACTCTAGAGGAGAAAACTCGTCTGAGCGAGTATAAATAGGTTATTAAGCTCAGAGCGGCAGGGTTCTTCCCTGCGTTAACTAATATCCGGAGCCATACCACATAGTCTGCAGCTAAGCCGGAAAGGGGGAGA	142
AGCGGCCGCGACTCTAGAGGAGAAAACTCGTCTGAGCGAGTGTAAATAGTAATTAAGCTCAGAGCGTCCCGGCAGCTGCCGGGGGTTTAGCAGTTTCCGGAGCCATACCACATCTCACATGACTAAGCCGGAAAGGGGGAGA	142
AGCGGCCGCGACTCTAGAGGAGAAAACTCGTCTGAGCGAGTGTAAATAGTAATTAAGCTCAGAGCGTCTTGGTCGGTATTACCGGCTGGGGGTTTAGCAGTTTCCGGAGCCATACCACATGCCAATGGACTAAGCCGGAAAGGGGGAGA	149
AGCGGCCGCGACTCTAGAGGAGAAAACTCGTCTGAGCGAGTGTAAATAGTAATTAAGCTCAGAGCGGCAGGGTTCTTCCCTGCGTTTAGCAGTTTCCGGAGCCATACCACATCACTTCACCCTAAGCCGGAAAGGGGGAGA	141
AGCGGCCGCGACTCTAGAGGAGAAAACTCGTCTGAGCGAGTGTAAATAGGCTTTAAGCTCAGAGCGTCCCGGCAGCTGCCGGGGGTAGTCAAAAATCCGGAGCCATACCACATCACTGCAAACTAAGCCGGAAAGGGGGAGA	142
AGCGGCCGCGACTCTAGAGGAGAAAACTCGTCTGAGCGAGTGTAAATAGGCTTTAAGCTCAGAGCGTCTTGGTCGGTATTACCGGCTGGGGGTAGTCAAAAATCCGGAGCCATACCACATTCGTCACAGCTAAGCCGGAAAGGGGGAGA	149
AGCGGCCGCGACTCTAGAGGAGAAAACTCGTCTGAGCGAGTGTAAATAGGCTTTAAGCTCAGAGCGGCAGGGTTCTTCCCTGCGTAGTCAAAAATCCGGAGCCATACCACATGGCCAAAATCTAAGCCGGAAAGGGGGAGA	141
AGCGGCCGCGACTCTAGAGGAGAAAACTCGTCTGAGCGAGTGTAAATAGACATTAAGCTCAGAGCGTCCCGGCAGCTGCCGGGGGTTGTATAACTTCCGGAGCCATACCACATAAAGTGCTGCTAAGCCGGAAAGGGGGAGA	142
AGCGGCCGCGACTCTAGAGGAGAAAACTCGTCTGAGCGAGTGTAAATAGACATTAAGCTCAGAGCGTCTTGGTCGGTATTACCGGCTGGGGGTTGTATAACTTCCGGAGCCATACCACATTAGCAGAAGCTAAGCCGGAAAGGGGGAGA	149
AGCGGCCGCGACTCTAGAGGAGAAAACTCGTCTGAGCGAGTGTAAATAGACATTAAGCTCAGAGCGGCAGGGTTCTTCCCTGCGTTGTATAACTTCCGGAGCCATACCACATTGTCACACACTAAGCCGGAAAGGGGGAGA	141
AGCGGCCGCGACTCTAGAGGAGAAAACTCGTCTGAGCGAGTGTAAATAGGTGTTAAGCTCAGAGCGTCCCGGCAGCTGCCGGGGGTCACATTAATTCCGGAGCCATACCACATGGGTAATCCCTAAGCCGGAAAGGGGGAGA	142
AGCGGCCGCGACTCTAGAGGAGAAAACTCGTCTGAGCGAGTGTAAATAGGTGTTAAGCTCAGAGCGTCTTGGTCGGTATTACCGGCTGGGGGTCACATTAATTCCGGAGCCATACCACATAGTTCTTCCCTAAGCCGGAAAGGGGGAGA	149
AGCGGCCGCGACTCTAGAGGAGAAAACTCGTCTGAGCGAGTGTAAATAGGTGTTAAGCTCAGAGCGGCAGGGTTCTTCCCTGCGTCACATTAATTCCGGAGCCATACCACATTTAGACGGACTAAGCCGGAAAGGGGGAGA	141
AGCGGCCGCGACTCTAGAGGAGAAAACTCGTCTGAGCGAGTGTAAATAGTTATTAAGCTCAGAGCGTCCCGGCAGCTGCCGGGGGTTAACTAATATCCGGAGCCATACCACATATAGCTCTGCTAAGCCGGAAAGGGGGAGA	142
AGCGGCCGCGACTCTAGAGGAGAAAACTCGTCTGAGCGAGTGTAAATAGTTATTAAGCTCAGAGCGTCTTGGTCGGTATTACCGGCTGGGGGTTAACTAATATCCGGAGCCATACCACATGCCGTTCAACTAAGCCGGAAAGGGGGAGA	149
AGCGGCCGCGACTCTAGAGGAGAAAACTCGTCTGAGCGAGTGTAAATAGTTATTAAGCTCAGAGCGGCAGGGTTCTTCCCTGCGTTAACTAATATCCGGAGCCATACCACATTTTCGCTCACTAAGCCGGAAAGGGGGAGA	141
AGCGGCCGCGACTCTAGAGGAGAAAACTCGTCTGAGCGAGTTTAAATAGTAATTAAGCTCAGAGCGTCCCGGCAGCTGCCGGGGGTTTAGCAGTTTCCGGAGCCATACCACATACTCACTGGCTAAGCCGGAAAGGGGGAGA	142
AGCGGCCGCGACTCTAGAGGAGAAAACTCGTCTGAGCGAGTTTAAATAGTAATTAAGCTCAGAGCGTCTTGGTCGGTATTACCGGCTGGGGGTTTAGCAGTTTCCGGAGCCATACCACATCCTGTCATTCTAAGCCGGAAAGGGGGAGA	149
AGCGGCCGCGACTCTAGAGGAGAAAACTCGTCTGAGCGAGTTTAAATAGTAATTAAGCTCAGAGCGGCAGGGTTCTTCCCTGCGTTTAGCAGTTTCCGGAGCCATACCACATCACTGACATCTAAGCCGGAAAGGGGGAGA	141
AGCGGCCGCGACTCTAGAGGAGAAAACTCGTCTGAGCGAGTTTAAATAGGCTTTAAGCTCAGAGCGTCCCGGCAGCTGCCGGGGGTAGTCAAAAATCCGGAGCCATACCACATCTTCGAAAGCTAAGCCGGAAAGGGGGAGA	142
AGCGGCCGCGACTCTAGAGGAGAAAACTCGTCTGAGCGAGTTTAAATAGGCTTTAAGCTCAGAGCGTCTTGGTCGGTATTACCGGCTGGGGGTAGTCAAAAATCCGGAGCCATACCACATTCTTTAGGCCTAAGCCGGAAAGGGGGAGA	149
AGCGGCCGCGACTCTAGAGGAGAAAACTCGTCTGAGCGAGTTTAAATAGGCTTTAAGCTCAGAGCGGCAGGGTTCTTCCCTGCGTAGTCAAAAATCCGGAGCCATACCACATCGGATAGGTCTAAGCCGGAAAGGGGGAGA	141
AGCGGCCGCGACTCTAGAGGAGAAAACTCGTCTGAGCGAGTTTAAATAGACATTAAGCTCAGAGCGTCCCGGCAGCTGCCGGGGGTTGTATAACTTCCGGAGCCATACCACATTACCGGATCCTAAGCCGGAAAGGGGGAGA	142
AGCGGCCGCGACTCTAGAGGAGAAAACTCGTCTGAGCGAGTTTAAATAGACATTAAGCTCAGAGCGTCTTGGTCGGTATTACCGGCTGGGGGTTGTATAACTTCCGGAGCCATACCACATAACGTCACTCTAAGCCGGAAAGGGGGAGA	149
AGCGGCCGCGACTCTAGAGGAGAAAACTCGTCTGAGCGAGTTTAAATAGACATTAAGCTCAGAGCGGCAGGGTTCTTCCCTGCGTTGTATAACTTCCGGAGCCATACCACATTTTGTCTGGCTAAGCCGGAAAGGGGGAGA	141
AGCGGCCGCGACTCTAGAGGAGAAAACTCGTCTGAGCGAGTTTAAATAGGTGTTAAGCTCAGAGCGTCCCGGCAGCTGCCGGGGGTCACATTAATTCCGGAGCCATACCACATGATCAACACCTAAGCCGGAAAGGGGGAGA	142
AGCGGCCGCGACTCTAGAGGAGAAAACTCGTCTGAGCGAGTTTAAATAGGTGTTAAGCTCAGAGCGTCTTGGTCGGTATTACCGGCTGGGGGTCACATTAATTCCGGAGCCATACCACATTTGTGACTGCTAAGCCGGAAAGGGGGAGA	149
AGCGGCCGCGACTCTAGAGGAGAAAACTCGTCTGAGCGAGTTTAAATAGGTGTTAAGCTCAGAGCGGCAGGGTTCTTCCCTGCGTCACATTAATTCCGGAGCCATACCACATTGGACCGTACTAAGCCGGAAAGGGGGAGA	141
AGCGGCCGCGACTCTAGAGGAGAAAACTCGTCTGAGCGAGTTTAAATAGTTATTAAGCTCAGAGCGTCCCGGCAGCTGCCGGGGGTTAACTAATATCCGGAGCCATACCACATGCATGTAAGCTAAGCCGGAAAGGGGGAGA	142
AGCGGCCGCGACTCTAGAGGAGAAAACTCGTCTGAGCGAGTTTAAATAGTTATTAAGCTCAGAGCGTCTTGGTCGGTATTACCGGCTGGGGGTTAACTAATATCCGGAGCCATACCACATCAAACTCCGCTAAGCCGGAAAGGGGGAGA	149
AGCGGCCGCGACTCTAGAGGAGAAAACTCGTCTGAGCGAGTTTAAATAGTTATTAAGCTCAGAGCGGCAGGGTTCTTCCCTGCGTTAACTAATATCCGGAGCCATACCACATATGCACAGCCTAAGCCGGAAAGGGGGAGA	141
AGCGGCCGCGACTCTAGAGGAGAAAACTCGTCTGAGCGAGTATAAACGTAATTAAGCTCAGAGCGTCCCGGCAGCTGCCGGGGGTTTAGCAGTTTCCGGAGCCATACCACATGAACCAGTACTAAGCCGGAAAGGGGGAGA	141
AGCGGCCGCGACTCTAGAGGAGAAAACTCGTCTGAGCGAGTATAAACGTAATTAAGCTCAGAGCGTCTTGGTCGGTATTACCGGCTGGGGGTTTAGCAGTTTCCGGAGCCATACCACATCTGTCGTAGCTAAGCCGGAAAGGGGGAGA	148
AGCGGCCGCGACTCTAGAGGAGAAAACTCGTCTGAGCGAGTATAAACGTAATTAAGCTCAGAGCGGCAGGGTTCTTCCCTGCGTTTAGCAGTTTCCGGAGCCATACCACATTGGCGCTAACTAAGCCGGAAAGGGGGAGA	140
AGCGGCCGCGACTCTAGAGGAGAAAACTCGTCTGAGCGAGTATAAACGGCTTTAAGCTCAGAGCGTCCCGGCAGCTGCCGGGGGTAGTCAAAAATCCGGAGCCATACCACATTCCTCTGGACTAAGCCGGAAAGGGGGAGA	141
AGCGGCCGCGACTCTAGAGGAGAAAACTCGTCTGAGCGAGTATAAACGGCTTTAAGCTCAGAGCGTCTTGGTCGGTATTACCGGCTGGGGGTAGTCAAAAATCCGGAGCCATACCACATTGGGGATTCCTAAGCCGGAAAGGGGGAGA	148
AGCGGCCGCGACTCTAGAGGAGAAAACTCGTCTGAGCGAGTATAAACGGCTTTAAGCTCAGAGCGGCAGGGTTCTTCCCTGCGTAGTCAAAAATCCGGAGCCATACCACATCAACCTAACCTAAGCCGGAAAGGGGGAGA	140
AGCGGCCGCGACTCTAGAGGAGAAAACTCGTCTGAGCGAGTATAAACGACATTAAGCTCAGAGCGTCCCGGCAGCTGCCGGGGGTTGTATAACTTCCGGAGCCATACCACATGACACTACGCTAAGCCGGAAAGGGGGAGA	141
AGCGGCCGCGACTCTAGAGGAGAAAACTCGTCTGAGCGAGTATAAACGACATTAAGCTCAGAGCGTCTTGGTCGGTATTACCGGCTGGGGGTTGTATAACTTCCGGAGCCATACCACATCCTGTATCCCTAAGCCGGAAAGGGGGAGA	148
AGCGGCCGCGACTCTAGAGGAGAAAACTCGTCTGAGCGAGTATAAACGACATTAAGCTCAGAGCGGCAGGGTTCTTCCCTGCGTTGTATAACTTCCGGAGCCATACCACATGATGTCCTGCTAAGCCGGAAAGGGGGAGA	140
AGCGGCCGCGACTCTAGAGGAGAAAACTCGTCTGAGCGAGTATAAACGGTGTTAAGCTCAGAGCGTCCCGGCAGCTGCCGGGGGTCACATTAATTCCGGAGCCATACCACATCGTTGCGTTCTAAGCCGGAAAGGGGGAGA	141
AGCGGCCGCGACTCTAGAGGAGAAAACTCGTCTGAGCGAGTATAAACGGTGTTAAGCTCAGAGCGTCTTGGTCGGTATTACCGGCTGGGGGTCACATTAATTCCGGAGCCATACCACATCATCCTAGCCTAAGCCGGAAAGGGGGAGA	148
AGCGGCCGCGACTCTAGAGGAGAAAACTCGTCTGAGCGAGTATAAACGGTGTTAAGCTCAGAGCGGCAGGGTTCTTCCCTGCGTCACATTAATTCCGGAGCCATACCACATGGCCTTAGACTAAGCCGGAAAGGGGGAGA	140
AGCGGCCGCGACTCTAGAGGAGAAAACTCGTCTGAGCGAGTATAAACGTTATTAAGCTCAGAGCGTCCCGGCAGCTGCCGGGGGTTAACTAATATCCGGAGCCATACCACATCAGTCGAGTCTAAGCCGGAAAGGGGGAGA	141
AGCGGCCGCGACTCTAGAGGAGAAAACTCGTCTGAGCGAGTATAAACGTTATTAAGCTCAGAGCGTCTTGGTCGGTATTACCGGCTGGGGGTTAACTAATATCCGGAGCCATACCACATGATCGGTGACTAAGCCGGAAAGGGGGAGA	148
AGCGGCCGCGACTCTAGAGGAGAAAACTCGTCTGAGCGAGTATAAACGTTATTAAGCTCAGAGCGGCAGGGTTCTTCCCTGCGTTAACTAATATCCGGAGCCATACCACATACTCGTAGACTAAGCCGGAAAGGGGGAGA	140
AGCGGCCGCGACTCTAGAGGAGAAAACTCGTCATAGCGAGTATAAATAGTAATTAAGCTATGAGCGTCCCGGCAGCTGCCGGGGGTTTAGCAGTTTCCGGAGCCATACCACATCTACCACACCTAAGCCGGAAAGGGGGAGA	142
AGCGGCCGCGACTCTAGAGGAGAAAACTCGTCATAGCGAGTATAAATAGTAATTAAGCTATGAGCGTCTTGGTCGGTATTACCGGCTGGGGGTTTAGCAGTTTCCGGAGCCATACCACATATGATGTCCCTAAGCCGGAAAGGGGGAGA	149
AGCGGCCGCGACTCTAGAGGAGAAAACTCGTCATAGCGAGTATAAATAGTAATTAAGCTATGAGCGGCAGGGTTCTTCCCTGCGTTTAGCAGTTTCCGGAGCCATACCACATGTTCAGTACCTAAGCCGGAAAGGGGGAGA	141
AGCGGCCGCGACTCTAGAGGAGAAAACTCGTCATAGCGAGTATAAATAGGCTTTAAGCTATGAGCGTCCCGGCAGCTGCCGGGGGTAGTCAAAAATCCGGAGCCATACCACATCAACCGGTACTAAGCCGGAAAGGGGGAGA	142
AGCGGCCGCGACTCTAGAGGAGAAAACTCGTCATAGCGAGTATAAATAGGCTTTAAGCTATGAGCGTCTTGGTCGGTATTACCGGCTGGGGGTAGTCAAAAATCCGGAGCCATACCACATTAGTACCACCTAAGCCGGAAAGGGGGAGA	149
AGCGGCCGCGACTCTAGAGGAGAAAACTCGTCATAGCGAGTATAAATAGGCTTTAAGCTATGAGCGGCAGGGTTCTTCCCTGCGTAGTCAAAAATCCGGAGCCATACCACATTCGTCTATGCTAAGCCGGAAAGGGGGAGA	141
AGCGGCCGCGACTCTAGAGGAGAAAACTCGTCATAGCGAGTATAAATAGACATTAAGCTATGAGCGTCCCGGCAGCTGCCGGGGGTTGTATAACTTCCGGAGCCATACCACATCGACATTAGCTAAGCCGGAAAGGGGGAGA	142
AGCGGCCGCGACTCTAGAGGAGAAAACTCGTCATAGCGAGTATAAATAGACATTAAGCTATGAGCGTCTTGGTCGGTATTACCGGCTGGGGGTTGTATAACTTCCGGAGCCATACCACATTACTTGTCGCTAAGCCGGAAAGGGGGAGA	149
AGCGGCCGCGACTCTAGAGGAGAAAACTCGTCATAGCGAGTATAAATAGACATTAAGCTATGAGCGGCAGGGTTCTTCCCTGCGTTGTATAACTTCCGGAGCCATACCACATTTCGATCGACTAAGCCGGAAAGGGGGAGA	141
AGCGGCCGCGACTCTAGAGGAGAAAACTCGTCATAGCGAGTATAAATAGGTGTTAAGCTATGAGCGTCCCGGCAGCTGCCGGGGGTCACATTAATTCCGGAGCCATACCACATTGTCTCACGCTAAGCCGGAAAGGGGGAGA	142
AGCGGCCGCGACTCTAGAGGAGAAAACTCGTCATAGCGAGTATAAATAGGTGTTAAGCTATGAGCGTCTTGGTCGGTATTACCGGCTGGGGGTCACATTAATTCCGGAGCCATACCACATCCCATCAAACTAAGCCGGAAAGGGGGAGA	149
AGCGGCCGCGACTCTAGAGGAGAAAACTCGTCATAGCGAGTATAAATAGGTGTTAAGCTATGAGCGGCAGGGTTCTTCCCTGCGTCACATTAATTCCGGAGCCATACCACATGGTTAAGGGCTAAGCCGGAAAGGGGGAGA	141
AGCGGCCGCGACTCTAGAGGAGAAAACTCGTCATAGCGAGTATAAATAGTTATTAAGCTATGAGCGTCCCGGCAGCTGCCGGGGGTTAACTAATATCCGGAGCCATACCACATCAAGTTGGACTAAGCCGGAAAGGGGGAGA	142
AGCGGCCGCGACTCTAGAGGAGAAAACTCGTCATAGCGAGTATAAATAGTTATTAAGCTATGAGCGTCTTGGTCGGTATTACCGGCTGGGGGTTAACTAATATCCGGAGCCATACCACATATCTTTGCCCTAAGCCGGAAAGGGGGAGA	149
AGCGGCCGCGACTCTAGAGGAGAAAACTCGTCATAGCGAGTATAAATAGTTATTAAGCTATGAGCGGCAGGGTTCTTCCCTGCGTTAACTAATATCCGGAGCCATACCACATTCTATCTGCCTAAGCCGGAAAGGGGGAGA	141
AGCGGCCGCGACTCTAGAGGAGAAAACTCGTCATAGCGAGTATAAATAGGTAATTAAGCTATGAGCGTCCCGGCAGCTGCCGGGGGTTTAGCAGTTTCCGGAGCCATACCACATGTACAGGTGCTAAGCCGGAAAGGGGGAGA	143
AGCGGCCGCGACTCTAGAGGAGAAAACTCGTCATAGCGAGTATAAATAGGTAATTAAGCTATGAGCGTCTTGGTCGGTATTACCGGCTGGGGGTTTAGCAGTTTCCGGAGCCATACCACATCAGTGTAGTCTAAGCCGGAAAGGGGGAGA	150
AGCGGCCGCGACTCTAGAGGAGAAAACTCGTCATAGCGAGTATAAATAGGTAATTAAGCTATGAGCGGCAGGGTTCTTCCCTGCGTTTAGCAGTTTCCGGAGCCATACCACATACAAGTTCCCTAAGCCGGAAAGGGGGAGA	142
AGCGGCCGCGACTCTAGAGGAGAAAACTCGTCATAGCGAGTATAAATAGGGCTTTAAGCTATGAGCGTCCCGGCAGCTGCCGGGGGTAGTCAAAAATCCGGAGCCATACCACATCTGTGGAGACTAAGCCGGAAAGGGGGAGA	143
AGCGGCCGCGACTCTAGAGGAGAAAACTCGTCATAGCGAGTATAAATAGGGCTTTAAGCTATGAGCGTCTTGGTCGGTATTACCGGCTGGGGGTAGTCAAAAATCCGGAGCCATACCACATGTTCGGGTACTAAGCCGGAAAGGGGGAGA	150
AGCGGCCGCGACTCTAGAGGAGAAAACTCGTCATAGCGAGTATAAATAGGGCTTTAAGCTATGAGCGGCAGGGTTCTTCCCTGCGTAGTCAAAAATCCGGAGCCATACCACATGCGCTATGTCTAAGCCGGAAAGGGGGAGA	142
AGCGGCCGCGACTCTAGAGGAGAAAACTCGTCATAGCGAGTATAAATAGGACATTAAGCTATGAGCGTCCCGGCAGCTGCCGGGGGTTGTATAACTTCCGGAGCCATACCACATGTATTAGGCCTAAGCCGGAAAGGGGGAGA	143
AGCGGCCGCGACTCTAGAGGAGAAAACTCGTCATAGCGAGTATAAATAGGACATTAAGCTATGAGCGTCTTGGTCGGTATTACCGGCTGGGGGTTGTATAACTTCCGGAGCCATACCACATTCGTCGCTACTAAGCCGGAAAGGGGGAGA	150
AGCGGCCGCGACTCTAGAGGAGAAAACTCGTCATAGCGAGTATAAATAGGACATTAAGCTATGAGCGGCAGGGTTCTTCCCTGCGTTGTATAACTTCCGGAGCCATACCACATTCACTCACACTAAGCCGGAAAGGGGGAGA	142
AGCGGCCGCGACTCTAGAGGAGAAAACTCGTCATAGCGAGTATAAATAGGGTGTTAAGCTATGAGCGTCCCGGCAGCTGCCGGGGGTCACATTAATTCCGGAGCCATACCACATCGTTGATCTCTAAGCCGGAAAGGGGGAGA	143
AGCGGCCGCGACTCTAGAGGAGAAAACTCGTCATAGCGAGTATAAATAGGGTGTTAAGCTATGAGCGTCTTGGTCGGTATTACCGGCTGGGGGTCACATTAATTCCGGAGCCATACCACATCATAGTAGCCTAAGCCGGAAAGGGGGAGA	150
AGCGGCCGCGACTCTAGAGGAGAAAACTCGTCATAGCGAGTATAAATAGGGTGTTAAGCTATGAGCGGCAGGGTTCTTCCCTGCGTCACATTAATTCCGGAGCCATACCACATCGAAGCTAACTAAGCCGGAAAGGGGGAGA	142
AGCGGCCGCGACTCTAGAGGAGAAAACTCGTCATAGCGAGTATAAATAGGTTATTAAGCTATGAGCGTCCCGGCAGCTGCCGGGGGTTAACTAATATCCGGAGCCATACCACATGACGGACATCTAAGCCGGAAAGGGGGAGA	143
AGCGGCCGCGACTCTAGAGGAGAAAACTCGTCATAGCGAGTATAAATAGGTTATTAAGCTATGAGCGTCTTGGTCGGTATTACCGGCTGGGGGTTAACTAATATCCGGAGCCATACCACATTACTTCCTGCTAAGCCGGAAAGGGGGAGA	150
AGCGGCCGCGACTCTAGAGGAGAAAACTCGTCATAGCGAGTATAAATAGGTTATTAAGCTATGAGCGGCAGGGTTCTTCCCTGCGTTAACTAATATCCGGAGCCATACCACATAACTTTCGGCTAAGCCGGAAAGGGGGAGA	142
AGCGGCCGCGACTCTAGAGGAGAAAACTCGTCATAGCGAGTGTAAATAGTAATTAAGCTATGAGCGTCCCGGCAGCTGCCGGGGGTTTAGCAGTTTCCGGAGCCATACCACATAGTGGCACTCTAAGCCGGAAAGGGGGAGA	142
AGCGGCCGCGACTCTAGAGGAGAAAACTCGTCATAGCGAGTGTAAATAGTAATTAAGCTATGAGCGTCTTGGTCGGTATTACCGGCTGGGGGTTTAGCAGTTTCCGGAGCCATACCACATAAGGACAAGCTAAGCCGGAAAGGGGGAGA	149
AGCGGCCGCGACTCTAGAGGAGAAAACTCGTCATAGCGAGTGTAAATAGTAATTAAGCTATGAGCGGCAGGGTTCTTCCCTGCGTTTAGCAGTTTCCGGAGCCATACCACATCCCAACTTTCTAAGCCGGAAAGGGGGAGA	141
AGCGGCCGCGACTCTAGAGGAGAAAACTCGTCATAGCGAGTGTAAATAGGCTTTAAGCTATGAGCGTCCCGGCAGCTGCCGGGGGTAGTCAAAAATCCGGAGCCATACCACATCTTATGGCGCTAAGCCGGAAAGGGGGAGA	142
AGCGGCCGCGACTCTAGAGGAGAAAACTCGTCATAGCGAGTGTAAATAGGCTTTAAGCTATGAGCGTCTTGGTCGGTATTACCGGCTGGGGGTAGTCAAAAATCCGGAGCCATACCACATTATTGTGCCCTAAGCCGGAAAGGGGGAGA	149
AGCGGCCGCGACTCTAGAGGAGAAAACTCGTCATAGCGAGTGTAAATAGGCTTTAAGCTATGAGCGGCAGGGTTCTTCCCTGCGTAGTCAAAAATCCGGAGCCATACCACATCGTGACGAACTAAGCCGGAAAGGGGGAGA	141
AGCGGCCGCGACTCTAGAGGAGAAAACTCGTCATAGCGAGTGTAAATAGACATTAAGCTATGAGCGTCCCGGCAGCTGCCGGGGGTTGTATAACTTCCGGAGCCATACCACATTCATGGTGGCTAAGCCGGAAAGGGGGAGA	142
AGCGGCCGCGACTCTAGAGGAGAAAACTCGTCATAGCGAGTGTAAATAGACATTAAGCTATGAGCGTCTTGGTCGGTATTACCGGCTGGGGGTTGTATAACTTCCGGAGCCATACCACATAGCTCTCGACTAAGCCGGAAAGGGGGAGA	149
AGCGGCCGCGACTCTAGAGGAGAAAACTCGTCATAGCGAGTGTAAATAGACATTAAGCTATGAGCGGCAGGGTTCTTCCCTGCGTTGTATAACTTCCGGAGCCATACCACATGATAGGTGTCTAAGCCGGAAAGGGGGAGA	141
AGCGGCCGCGACTCTAGAGGAGAAAACTCGTCATAGCGAGTGTAAATAGGTGTTAAGCTATGAGCGTCCCGGCAGCTGCCGGGGGTCACATTAATTCCGGAGCCATACCACATTACGGGTAGCTAAGCCGGAAAGGGGGAGA	142
AGCGGCCGCGACTCTAGAGGAGAAAACTCGTCATAGCGAGTGTAAATAGGTGTTAAGCTATGAGCGTCTTGGTCGGTATTACCGGCTGGGGGTCACATTAATTCCGGAGCCATACCACATGGAAGCTTTCTAAGCCGGAAAGGGGGAGA	149
AGCGGCCGCGACTCTAGAGGAGAAAACTCGTCATAGCGAGTGTAAATAGGTGTTAAGCTATGAGCGGCAGGGTTCTTCCCTGCGTCACATTAATTCCGGAGCCATACCACATACTTCCGCACTAAGCCGGAAAGGGGGAGA	141
AGCGGCCGCGACTCTAGAGGAGAAAACTCGTCATAGCGAGTGTAAATAGTTATTAAGCTATGAGCGTCCCGGCAGCTGCCGGGGGTTAACTAATATCCGGAGCCATACCACATTCTAATCCCCTAAGCCGGAAAGGGGGAGA	142
AGCGGCCGCGACTCTAGAGGAGAAAACTCGTCATAGCGAGTGTAAATAGTTATTAAGCTATGAGCGTCTTGGTCGGTATTACCGGCTGGGGGTTAACTAATATCCGGAGCCATACCACATTCATGGAACCTAAGCCGGAAAGGGGGAGA	149
AGCGGCCGCGACTCTAGAGGAGAAAACTCGTCATAGCGAGTGTAAATAGTTATTAAGCTATGAGCGGCAGGGTTCTTCCCTGCGTTAACTAATATCCGGAGCCATACCACATGGAGAAGATCTAAGCCGGAAAGGGGGAGA	141
AGCGGCCGCGACTCTAGAGGAGAAAACTCGTCATAGCGAGTTTAAATAGTAATTAAGCTATGAGCGTCCCGGCAGCTGCCGGGGGTTTAGCAGTTTCCGGAGCCATACCACATATAGTCCGGCTAAGCCGGAAAGGGGGAGA	142
AGCGGCCGCGACTCTAGAGGAGAAAACTCGTCATAGCGAGTTTAAATAGTAATTAAGCTATGAGCGTCTTGGTCGGTATTACCGGCTGGGGGTTTAGCAGTTTCCGGAGCCATACCACATGTAAACTGGCTAAGCCGGAAAGGGGGAGA	149
AGCGGCCGCGACTCTAGAGGAGAAAACTCGTCATAGCGAGTTTAAATAGTAATTAAGCTATGAGCGGCAGGGTTCTTCCCTGCGTTTAGCAGTTTCCGGAGCCATACCACATGCTCGATACCTAAGCCGGAAAGGGGGAGA	141
AGCGGCCGCGACTCTAGAGGAGAAAACTCGTCATAGCGAGTTTAAATAGGCTTTAAGCTATGAGCGTCCCGGCAGCTGCCGGGGGTAGTCAAAAATCCGGAGCCATACCACATGACTATACCCTAAGCCGGAAAGGGGGAGA	142
AGCGGCCGCGACTCTAGAGGAGAAAACTCGTCATAGCGAGTTTAAATAGGCTTTAAGCTATGAGCGTCTTGGTCGGTATTACCGGCTGGGGGTAGTCAAAAATCCGGAGCCATACCACATAAGGACGTTCTAAGCCGGAAAGGGGGAGA	149
AGCGGCCGCGACTCTAGAGGAGAAAACTCGTCATAGCGAGTTTAAATAGGCTTTAAGCTATGAGCGGCAGGGTTCTTCCCTGCGTAGTCAAAAATCCGGAGCCATACCACATACACTTGCCCTAAGCCGGAAAGGGGGAGA	141
AGCGGCCGCGACTCTAGAGGAGAAAACTCGTCATAGCGAGTTTAAATAGACATTAAGCTATGAGCGTCCCGGCAGCTGCCGGGGGTTGTATAACTTCCGGAGCCATACCACATGGGTATCGTCTAAGCCGGAAAGGGGGAGA	142
AGCGGCCGCGACTCTAGAGGAGAAAACTCGTCATAGCGAGTTTAAATAGACATTAAGCTATGAGCGTCTTGGTCGGTATTACCGGCTGGGGGTTGTATAACTTCCGGAGCCATACCACATACTTGCGGACTAAGCCGGAAAGGGGGAGA	149
AGCGGCCGCGACTCTAGAGGAGAAAACTCGTCATAGCGAGTTTAAATAGACATTAAGCTATGAGCGGCAGGGTTCTTCCCTGCGTTGTATAACTTCCGGAGCCATACCACATCGCCTAAACCTAAGCCGGAAAGGGGGAGA	141
AGCGGCCGCGACTCTAGAGGAGAAAACTCGTCATAGCGAGTTTAAATAGGTGTTAAGCTATGAGCGTCCCGGCAGCTGCCGGGGGTCACATTAATTCCGGAGCCATACCACATATCGGCTGACTAAGCCGGAAAGGGGGAGA	142
AGCGGCCGCGACTCTAGAGGAGAAAACTCGTCATAGCGAGTTTAAATAGGTGTTAAGCTATGAGCGTCTTGGTCGGTATTACCGGCTGGGGGTCACATTAATTCCGGAGCCATACCACATTATGATCCCCTAAGCCGGAAAGGGGGAGA	149
AGCGGCCGCGACTCTAGAGGAGAAAACTCGTCATAGCGAGTTTAAATAGGTGTTAAGCTATGAGCGGCAGGGTTCTTCCCTGCGTCACATTAATTCCGGAGCCATACCACATCAAAGTGGCCTAAGCCGGAAAGGGGGAGA	141
AGCGGCCGCGACTCTAGAGGAGAAAACTCGTCATAGCGAGTTTAAATAGTTATTAAGCTATGAGCGTCCCGGCAGCTGCCGGGGGTTAACTAATATCCGGAGCCATACCACATCAGGGGTTACTAAGCCGGAAAGGGGGAGA	142
AGCGGCCGCGACTCTAGAGGAGAAAACTCGTCATAGCGAGTTTAAATAGTTATTAAGCTATGAGCGTCTTGGTCGGTATTACCGGCTGGGGGTTAACTAATATCCGGAGCCATACCACATTAAGGATGGCTAAGCCGGAAAGGGGGAGA	149
AGCGGCCGCGACTCTAGAGGAGAAAACTCGTCATAGCGAGTTTAAATAGTTATTAAGCTATGAGCGGCAGGGTTCTTCCCTGCGTTAACTAATATCCGGAGCCATACCACATGTCGGATTGCTAAGCCGGAAAGGGGGAGA	141
AGCGGCCGCGACTCTAGAGGAGAAAACTCGTCATAGCGAGTATAAACGTAATTAAGCTATGAGCGTCCCGGCAGCTGCCGGGGGTTTAGCAGTTTCCGGAGCCATACCACATTCGGAAGAACTAAGCCGGAAAGGGGGAGA	141
AGCGGCCGCGACTCTAGAGGAGAAAACTCGTCATAGCGAGTATAAACGTAATTAAGCTATGAGCGTCTTGGTCGGTATTACCGGCTGGGGGTTTAGCAGTTTCCGGAGCCATACCACATGCTCCTAGACTAAGCCGGAAAGGGGGAGA	148
AGCGGCCGCGACTCTAGAGGAGAAAACTCGTCATAGCGAGTATAAACGTAATTAAGCTATGAGCGGCAGGGTTCTTCCCTGCGTTTAGCAGTTTCCGGAGCCATACCACATACCCTAGCTCTAAGCCGGAAAGGGGGAGA	140
AGCGGCCGCGACTCTAGAGGAGAAAACTCGTCATAGCGAGTATAAACGGCTTTAAGCTATGAGCGTCCCGGCAGCTGCCGGGGGTAGTCAAAAATCCGGAGCCATACCACATCGACCAGAACTAAGCCGGAAAGGGGGAGA	141
AGCGGCCGCGACTCTAGAGGAGAAAACTCGTCATAGCGAGTATAAACGGCTTTAAGCTATGAGCGTCTTGGTCGGTATTACCGGCTGGGGGTAGTCAAAAATCCGGAGCCATACCACATGAAAGCTCACTAAGCCGGAAAGGGGGAGA	148
AGCGGCCGCGACTCTAGAGGAGAAAACTCGTCATAGCGAGTATAAACGGCTTTAAGCTATGAGCGGCAGGGTTCTTCCCTGCGTAGTCAAAAATCCGGAGCCATACCACATAACCTAACGCTAAGCCGGAAAGGGGGAGA	140
AGCGGCCGCGACTCTAGAGGAGAAAACTCGTCATAGCGAGTATAAACGACATTAAGCTATGAGCGTCCCGGCAGCTGCCGGGGGTTGTATAACTTCCGGAGCCATACCACATTGCATGAACCTAAGCCGGAAAGGGGGAGA	141
AGCGGCCGCGACTCTAGAGGAGAAAACTCGTCATAGCGAGTATAAACGACATTAAGCTATGAGCGTCTTGGTCGGTATTACCGGCTGGGGGTTGTATAACTTCCGGAGCCATACCACATACTAGCCATCTAAGCCGGAAAGGGGGAGA	148
AGCGGCCGCGACTCTAGAGGAGAAAACTCGTCATAGCGAGTATAAACGACATTAAGCTATGAGCGGCAGGGTTCTTCCCTGCGTTGTATAACTTCCGGAGCCATACCACATTTAGGACACCTAAGCCGGAAAGGGGGAGA	140
AGCGGCCGCGACTCTAGAGGAGAAAACTCGTCATAGCGAGTATAAACGGTGTTAAGCTATGAGCGTCCCGGCAGCTGCCGGGGGTCACATTAATTCCGGAGCCATACCACATCTGAATGCACTAAGCCGGAAAGGGGGAGA	141
AGCGGCCGCGACTCTAGAGGAGAAAACTCGTCATAGCGAGTATAAACGGTGTTAAGCTATGAGCGTCTTGGTCGGTATTACCGGCTGGGGGTCACATTAATTCCGGAGCCATACCACATGACTTCGTTCTAAGCCGGAAAGGGGGAGA	148
AGCGGCCGCGACTCTAGAGGAGAAAACTCGTCATAGCGAGTATAAACGGTGTTAAGCTATGAGCGGCAGGGTTCTTCCCTGCGTCACATTAATTCCGGAGCCATACCACATTCGTACCTTCTAAGCCGGAAAGGGGGAGA	140
AGCGGCCGCGACTCTAGAGGAGAAAACTCGTCATAGCGAGTATAAACGTTATTAAGCTATGAGCGTCCCGGCAGCTGCCGGGGGTTAACTAATATCCGGAGCCATACCACATGCTTACCACCTAAGCCGGAAAGGGGGAGA	141
AGCGGCCGCGACTCTAGAGGAGAAAACTCGTCATAGCGAGTATAAACGTTATTAAGCTATGAGCGTCTTGGTCGGTATTACCGGCTGGGGGTTAACTAATATCCGGAGCCATACCACATGGCATAGACCTAAGCCGGAAAGGGGGAGA	148
AGCGGCCGCGACTCTAGAGGAGAAAACTCGTCATAGCGAGTATAAACGTTATTAAGCTATGAGCGGCAGGGTTCTTCCCTGCGTTAACTAATATCCGGAGCCATACCACATAGTATGGCGCTAAGCCGGAAAGGGGGAGA	140
AGCGGCCGCGACTCTAGAGGAGAAAACTCGACTAAGCGAGTATAAATAGTAATTAGGCTTAGAGCGTCCCGGCAGCTGCCGGGGGTTTAGCAGTTTCCGGAGCCATACCACATGCCTTCTACCTAAGCCGGAAAGGGGGAGA	142
AGCGGCCGCGACTCTAGAGGAGAAAACTCGACTAAGCGAGTATAAATAGTAATTAGGCTTAGAGCGTCTTGGTCGGTATTACCGGCTGGGGGTTTAGCAGTTTCCGGAGCCATACCACATTTCTAGTGGCTAAGCCGGAAAGGGGGAGA	149
AGCGGCCGCGACTCTAGAGGAGAAAACTCGACTAAGCGAGTATAAATAGTAATTAGGCTTAGAGCGGCAGGGTTCTTCCCTGCGTTTAGCAGTTTCCGGAGCCATACCACATTGTAGAGTCCTAAGCCGGAAAGGGGGAGA	141
AGCGGCCGCGACTCTAGAGGAGAAAACTCGACTAAGCGAGTATAAATAGGCTTTAGGCTTAGAGCGTCCCGGCAGCTGCCGGGGGTAGTCAAAAATCCGGAGCCATACCACATTGACCTGTACTAAGCCGGAAAGGGGGAGA	142
AGCGGCCGCGACTCTAGAGGAGAAAACTCGACTAAGCGAGTATAAATAGGCTTTAGGCTTAGAGCGTCTTGGTCGGTATTACCGGCTGGGGGTAGTCAAAAATCCGGAGCCATACCACATGACTGACTCCTAAGCCGGAAAGGGGGAGA	149
AGCGGCCGCGACTCTAGAGGAGAAAACTCGACTAAGCGAGTATAAATAGGCTTTAGGCTTAGAGCGGCAGGGTTCTTCCCTGCGTAGTCAAAAATCCGGAGCCATACCACATCATGCTCTGCTAAGCCGGAAAGGGGGAGA	141
AGCGGCCGCGACTCTAGAGGAGAAAACTCGACTAAGCGAGTATAAATAGACATTAGGCTTAGAGCGTCCCGGCAGCTGCCGGGGGTTGTATAACTTCCGGAGCCATACCACATGACATCCTACTAAGCCGGAAAGGGGGAGA	142
AGCGGCCGCGACTCTAGAGGAGAAAACTCGACTAAGCGAGTATAAATAGACATTAGGCTTAGAGCGTCTTGGTCGGTATTACCGGCTGGGGGTTGTATAACTTCCGGAGCCATACCACATGGGTAACTACTAAGCCGGAAAGGGGGAGA	149
AGCGGCCGCGACTCTAGAGGAGAAAACTCGACTAAGCGAGTATAAATAGACATTAGGCTTAGAGCGGCAGGGTTCTTCCCTGCGTTGTATAACTTCCGGAGCCATACCACATCAAAGATCGCTAAGCCGGAAAGGGGGAGA	141
AGCGGCCGCGACTCTAGAGGAGAAAACTCGACTAAGCGAGTATAAATAGGTGTTAGGCTTAGAGCGTCCCGGCAGCTGCCGGGGGTCACATTAATTCCGGAGCCATACCACATTATGTCCGACTAAGCCGGAAAGGGGGAGA	142
AGCGGCCGCGACTCTAGAGGAGAAAACTCGACTAAGCGAGTATAAATAGGTGTTAGGCTTAGAGCGTCTTGGTCGGTATTACCGGCTGGGGGTCACATTAATTCCGGAGCCATACCACATTGGTCAGTTCTAAGCCGGAAAGGGGGAGA	149
AGCGGCCGCGACTCTAGAGGAGAAAACTCGACTAAGCGAGTATAAATAGGTGTTAGGCTTAGAGCGGCAGGGTTCTTCCCTGCGTCACATTAATTCCGGAGCCATACCACATACACCTCGTCTAAGCCGGAAAGGGGGAGA	141
AGCGGCCGCGACTCTAGAGGAGAAAACTCGACTAAGCGAGTATAAATAGTTATTAGGCTTAGAGCGTCCCGGCAGCTGCCGGGGGTTAACTAATATCCGGAGCCATACCACATCGACCATACCTAAGCCGGAAAGGGGGAGA	142
AGCGGCCGCGACTCTAGAGGAGAAAACTCGACTAAGCGAGTATAAATAGTTATTAGGCTTAGAGCGTCTTGGTCGGTATTACCGGCTGGGGGTTAACTAATATCCGGAGCCATACCACATCGTGAAGCACTAAGCCGGAAAGGGGGAGA	149
AGCGGCCGCGACTCTAGAGGAGAAAACTCGACTAAGCGAGTATAAATAGTTATTAGGCTTAGAGCGGCAGGGTTCTTCCCTGCGTTAACTAATATCCGGAGCCATACCACATGAGAGGGAACTAAGCCGGAAAGGGGGAGA	141
AGCGGCCGCGACTCTAGAGGAGAAAACTCGACTAAGCGAGTATAAATAGGTAATTAGGCTTAGAGCGTCCCGGCAGCTGCCGGGGGTTTAGCAGTTTCCGGAGCCATACCACATCATGGGAATCTAAGCCGGAAAGGGGGAGA	143
AGCGGCCGCGACTCTAGAGGAGAAAACTCGACTAAGCGAGTATAAATAGGTAATTAGGCTTAGAGCGTCTTGGTCGGTATTACCGGCTGGGGGTTTAGCAGTTTCCGGAGCCATACCACATTGCGTGTTTCTAAGCCGGAAAGGGGGAGA	150
AGCGGCCGCGACTCTAGAGGAGAAAACTCGACTAAGCGAGTATAAATAGGTAATTAGGCTTAGAGCGGCAGGGTTCTTCCCTGCGTTTAGCAGTTTCCGGAGCCATACCACATGACCTCCTTCTAAGCCGGAAAGGGGGAGA	142
AGCGGCCGCGACTCTAGAGGAGAAAACTCGACTAAGCGAGTATAAATAGGGCTTTAGGCTTAGAGCGTCCCGGCAGCTGCCGGGGGTAGTCAAAAATCCGGAGCCATACCACATCGTAGTTGTCTAAGCCGGAAAGGGGGAGA	143
AGCGGCCGCGACTCTAGAGGAGAAAACTCGACTAAGCGAGTATAAATAGGGCTTTAGGCTTAGAGCGTCTTGGTCGGTATTACCGGCTGGGGGTAGTCAAAAATCCGGAGCCATACCACATGGTTCGTACCTAAGCCGGAAAGGGGGAGA	150
AGCGGCCGCGACTCTAGAGGAGAAAACTCGACTAAGCGAGTATAAATAGGGCTTTAGGCTTAGAGCGGCAGGGTTCTTCCCTGCGTAGTCAAAAATCCGGAGCCATACCACATCCTTCAGTACTAAGCCGGAAAGGGGGAGA	142
AGCGGCCGCGACTCTAGAGGAGAAAACTCGACTAAGCGAGTATAAATAGGACATTAGGCTTAGAGCGTCCCGGCAGCTGCCGGGGGTTGTATAACTTCCGGAGCCATACCACATAAGATCAGCCTAAGCCGGAAAGGGGGAGA	143
AGCGGCCGCGACTCTAGAGGAGAAAACTCGACTAAGCGAGTATAAATAGGACATTAGGCTTAGAGCGTCTTGGTCGGTATTACCGGCTGGGGGTTGTATAACTTCCGGAGCCATACCACATACTTACGGGCTAAGCCGGAAAGGGGGAGA	150
AGCGGCCGCGACTCTAGAGGAGAAAACTCGACTAAGCGAGTATAAATAGGACATTAGGCTTAGAGCGGCAGGGTTCTTCCCTGCGTTGTATAACTTCCGGAGCCATACCACATAAGGGATGGCTAAGCCGGAAAGGGGGAGA	142
AGCGGCCGCGACTCTAGAGGAGAAAACTCGACTAAGCGAGTATAAATAGGGTGTTAGGCTTAGAGCGTCCCGGCAGCTGCCGGGGGTCACATTAATTCCGGAGCCATACCACATTGAGCAGCTCTAAGCCGGAAAGGGGGAGA	143
AGCGGCCGCGACTCTAGAGGAGAAAACTCGACTAAGCGAGTATAAATAGGGTGTTAGGCTTAGAGCGTCTTGGTCGGTATTACCGGCTGGGGGTCACATTAATTCCGGAGCCATACCACATAAATTCGCGCTAAGCCGGAAAGGGGGAGA	150
AGCGGCCGCGACTCTAGAGGAGAAAACTCGACTAAGCGAGTATAAATAGGGTGTTAGGCTTAGAGCGGCAGGGTTCTTCCCTGCGTCACATTAATTCCGGAGCCATACCACATCATCCACGACTAAGCCGGAAAGGGGGAGA	142
AGCGGCCGCGACTCTAGAGGAGAAAACTCGACTAAGCGAGTATAAATAGGTTATTAGGCTTAGAGCGTCCCGGCAGCTGCCGGGGGTTAACTAATATCCGGAGCCATACCACATTCCGTGTAACTAAGCCGGAAAGGGGGAGA	143
AGCGGCCGCGACTCTAGAGGAGAAAACTCGACTAAGCGAGTATAAATAGGTTATTAGGCTTAGAGCGTCTTGGTCGGTATTACCGGCTGGGGGTTAACTAATATCCGGAGCCATACCACATGGCTTGGAACTAAGCCGGAAAGGGGGAGA	150
AGCGGCCGCGACTCTAGAGGAGAAAACTCGACTAAGCGAGTATAAATAGGTTATTAGGCTTAGAGCGGCAGGGTTCTTCCCTGCGTTAACTAATATCCGGAGCCATACCACATTTTCTGCTGCTAAGCCGGAAAGGGGGAGA	142
AGCGGCCGCGACTCTAGAGGAGAAAACTCGACTAAGCGAGTGTAAATAGTAATTAGGCTTAGAGCGTCCCGGCAGCTGCCGGGGGTTTAGCAGTTTCCGGAGCCATACCACATCGTAAAGGACTAAGCCGGAAAGGGGGAGA	142
AGCGGCCGCGACTCTAGAGGAGAAAACTCGACTAAGCGAGTGTAAATAGTAATTAGGCTTAGAGCGTCTTGGTCGGTATTACCGGCTGGGGGTTTAGCAGTTTCCGGAGCCATACCACATTACAAGTCCCTAAGCCGGAAAGGGGGAGA	149
AGCGGCCGCGACTCTAGAGGAGAAAACTCGACTAAGCGAGTGTAAATAGTAATTAGGCTTAGAGCGGCAGGGTTCTTCCCTGCGTTTAGCAGTTTCCGGAGCCATACCACATGGACTTCGTCTAAGCCGGAAAGGGGGAGA	141
AGCGGCCGCGACTCTAGAGGAGAAAACTCGACTAAGCGAGTGTAAATAGGCTTTAGGCTTAGAGCGTCCCGGCAGCTGCCGGGGGTAGTCAAAAATCCGGAGCCATACCACATCCAGGACTACTAAGCCGGAAAGGGGGAGA	142
AGCGGCCGCGACTCTAGAGGAGAAAACTCGACTAAGCGAGTGTAAATAGGCTTTAGGCTTAGAGCGTCTTGGTCGGTATTACCGGCTGGGGGTAGTCAAAAATCCGGAGCCATACCACATCACTCAGTTCTAAGCCGGAAAGGGGGAGA	149
AGCGGCCGCGACTCTAGAGGAGAAAACTCGACTAAGCGAGTGTAAATAGGCTTTAGGCTTAGAGCGGCAGGGTTCTTCCCTGCGTAGTCAAAAATCCGGAGCCATACCACATGTGTCCACTCTAAGCCGGAAAGGGGGAGA	141
AGCGGCCGCGACTCTAGAGGAGAAAACTCGACTAAGCGAGTGTAAATAGACATTAGGCTTAGAGCGTCCCGGCAGCTGCCGGGGGTTGTATAACTTCCGGAGCCATACCACATAGCTCAGTGCTAAGCCGGAAAGGGGGAGA	142
AGCGGCCGCGACTCTAGAGGAGAAAACTCGACTAAGCGAGTGTAAATAGACATTAGGCTTAGAGCGTCTTGGTCGGTATTACCGGCTGGGGGTTGTATAACTTCCGGAGCCATACCACATCCGCCATAACTAAGCCGGAAAGGGGGAGA	149
AGCGGCCGCGACTCTAGAGGAGAAAACTCGACTAAGCGAGTGTAAATAGACATTAGGCTTAGAGCGGCAGGGTTCTTCCCTGCGTTGTATAACTTCCGGAGCCATACCACATTTGCCACTTCTAAGCCGGAAAGGGGGAGA	141
AGCGGCCGCGACTCTAGAGGAGAAAACTCGACTAAGCGAGTGTAAATAGGTGTTAGGCTTAGAGCGTCCCGGCAGCTGCCGGGGGTCACATTAATTCCGGAGCCATACCACATACCATGGAACTAAGCCGGAAAGGGGGAGA	142
AGCGGCCGCGACTCTAGAGGAGAAAACTCGACTAAGCGAGTGTAAATAGGTGTTAGGCTTAGAGCGTCTTGGTCGGTATTACCGGCTGGGGGTCACATTAATTCCGGAGCCATACCACATCCTAGCGATCTAAGCCGGAAAGGGGGAGA	149
AGCGGCCGCGACTCTAGAGGAGAAAACTCGACTAAGCGAGTGTAAATAGGTGTTAGGCTTAGAGCGGCAGGGTTCTTCCCTGCGTCACATTAATTCCGGAGCCATACCACATACGCAAACCCTAAGCCGGAAAGGGGGAGA	141
AGCGGCCGCGACTCTAGAGGAGAAAACTCGACTAAGCGAGTGTAAATAGTTATTAGGCTTAGAGCGTCCCGGCAGCTGCCGGGGGTTAACTAATATCCGGAGCCATACCACATCTACCATGACTAAGCCGGAAAGGGGGAGA	142
AGCGGCCGCGACTCTAGAGGAGAAAACTCGACTAAGCGAGTGTAAATAGTTATTAGGCTTAGAGCGTCTTGGTCGGTATTACCGGCTGGGGGTTAACTAATATCCGGAGCCATACCACATATAACCCGGCTAAGCCGGAAAGGGGGAGA	149
AGCGGCCGCGACTCTAGAGGAGAAAACTCGACTAAGCGAGTGTAAATAGTTATTAGGCTTAGAGCGGCAGGGTTCTTCCCTGCGTTAACTAATATCCGGAGCCATACCACATCTCTTAGCTCTAAGCCGGAAAGGGGGAGA	141
AGCGGCCGCGACTCTAGAGGAGAAAACTCGACTAAGCGAGTTTAAATAGTAATTAGGCTTAGAGCGTCCCGGCAGCTGCCGGGGGTTTAGCAGTTTCCGGAGCCATACCACATAATTGAGGGCTAAGCCGGAAAGGGGGAGA	142
AGCGGCCGCGACTCTAGAGGAGAAAACTCGACTAAGCGAGTTTAAATAGTAATTAGGCTTAGAGCGTCTTGGTCGGTATTACCGGCTGGGGGTTTAGCAGTTTCCGGAGCCATACCACATTGAGCGAATCTAAGCCGGAAAGGGGGAGA	149
AGCGGCCGCGACTCTAGAGGAGAAAACTCGACTAAGCGAGTTTAAATAGTAATTAGGCTTAGAGCGGCAGGGTTCTTCCCTGCGTTTAGCAGTTTCCGGAGCCATACCACATTCACCCGAACTAAGCCGGAAAGGGGGAGA	141
AGCGGCCGCGACTCTAGAGGAGAAAACTCGACTAAGCGAGTTTAAATAGGCTTTAGGCTTAGAGCGTCCCGGCAGCTGCCGGGGGTAGTCAAAAATCCGGAGCCATACCACATACTTGTCCACTAAGCCGGAAAGGGGGAGA	142
AGCGGCCGCGACTCTAGAGGAGAAAACTCGACTAAGCGAGTTTAAATAGGCTTTAGGCTTAGAGCGTCTTGGTCGGTATTACCGGCTGGGGGTAGTCAAAAATCCGGAGCCATACCACATCCAGGAAGACTAAGCCGGAAAGGGGGAGA	149
AGCGGCCGCGACTCTAGAGGAGAAAACTCGACTAAGCGAGTTTAAATAGGCTTTAGGCTTAGAGCGGCAGGGTTCTTCCCTGCGTAGTCAAAAATCCGGAGCCATACCACATAAGACCGACCTAAGCCGGAAAGGGGGAGA	141
AGCGGCCGCGACTCTAGAGGAGAAAACTCGACTAAGCGAGTTTAAATAGACATTAGGCTTAGAGCGTCCCGGCAGCTGCCGGGGGTTGTATAACTTCCGGAGCCATACCACATCAGGCATACCTAAGCCGGAAAGGGGGAGA	142
AGCGGCCGCGACTCTAGAGGAGAAAACTCGACTAAGCGAGTTTAAATAGACATTAGGCTTAGAGCGTCTTGGTCGGTATTACCGGCTGGGGGTTGTATAACTTCCGGAGCCATACCACATATTCACGCACTAAGCCGGAAAGGGGGAGA	149
AGCGGCCGCGACTCTAGAGGAGAAAACTCGACTAAGCGAGTTTAAATAGACATTAGGCTTAGAGCGGCAGGGTTCTTCCCTGCGTTGTATAACTTCCGGAGCCATACCACATTAGTTACCGCTAAGCCGGAAAGGGGGAGA	141
AGCGGCCGCGACTCTAGAGGAGAAAACTCGACTAAGCGAGTTTAAATAGGTGTTAGGCTTAGAGCGTCCCGGCAGCTGCCGGGGGTCACATTAATTCCGGAGCCATACCACATTCCAAGGCTCTAAGCCGGAAAGGGGGAGA	142
AGCGGCCGCGACTCTAGAGGAGAAAACTCGACTAAGCGAGTTTAAATAGGTGTTAGGCTTAGAGCGTCTTGGTCGGTATTACCGGCTGGGGGTCACATTAATTCCGGAGCCATACCACATATTCGACCGCTAAGCCGGAAAGGGGGAGA	149
AGCGGCCGCGACTCTAGAGGAGAAAACTCGACTAAGCGAGTTTAAATAGGTGTTAGGCTTAGAGCGGCAGGGTTCTTCCCTGCGTCACATTAATTCCGGAGCCATACCACATACCCCAAATCTAAGCCGGAAAGGGGGAGA	141
AGCGGCCGCGACTCTAGAGGAGAAAACTCGACTAAGCGAGTTTAAATAGTTATTAGGCTTAGAGCGTCCCGGCAGCTGCCGGGGGTTAACTAATATCCGGAGCCATACCACATACTGAAGCACTAAGCCGGAAAGGGGGAGA	142
AGCGGCCGCGACTCTAGAGGAGAAAACTCGACTAAGCGAGTTTAAATAGTTATTAGGCTTAGAGCGTCTTGGTCGGTATTACCGGCTGGGGGTTAACTAATATCCGGAGCCATACCACATTGGCTGAATCTAAGCCGGAAAGGGGGAGA	149
AGCGGCCGCGACTCTAGAGGAGAAAACTCGACTAAGCGAGTTTAAATAGTTATTAGGCTTAGAGCGGCAGGGTTCTTCCCTGCGTTAACTAATATCCGGAGCCATACCACATTGCTACCTACTAAGCCGGAAAGGGGGAGA	141
AGCGGCCGCGACTCTAGAGGAGAAAACTCGACTAAGCGAGTATAAACGTAATTAGGCTTAGAGCGTCCCGGCAGCTGCCGGGGGTTTAGCAGTTTCCGGAGCCATACCACATTCTTTCCCTCTAAGCCGGAAAGGGGGAGA	141
AGCGGCCGCGACTCTAGAGGAGAAAACTCGACTAAGCGAGTATAAACGTAATTAGGCTTAGAGCGTCTTGGTCGGTATTACCGGCTGGGGGTTTAGCAGTTTCCGGAGCCATACCACATGTATCTTCGCTAAGCCGGAAAGGGGGAGA	148
AGCGGCCGCGACTCTAGAGGAGAAAACTCGACTAAGCGAGTATAAACGTAATTAGGCTTAGAGCGGCAGGGTTCTTCCCTGCGTTTAGCAGTTTCCGGAGCCATACCACATATGACGACCCTAAGCCGGAAAGGGGGAGA	140
AGCGGCCGCGACTCTAGAGGAGAAAACTCGACTAAGCGAGTATAAACGGCTTTAGGCTTAGAGCGTCCCGGCAGCTGCCGGGGGTAGTCAAAAATCCGGAGCCATACCACATTCCGTATGTCTAAGCCGGAAAGGGGGAGA	141
AGCGGCCGCGACTCTAGAGGAGAAAACTCGACTAAGCGAGTATAAACGGCTTTAGGCTTAGAGCGTCTTGGTCGGTATTACCGGCTGGGGGTAGTCAAAAATCCGGAGCCATACCACATCCATTTCCCCTAAGCCGGAAAGGGGGAGA	148
AGCGGCCGCGACTCTAGAGGAGAAAACTCGACTAAGCGAGTATAAACGGCTTTAGGCTTAGAGCGGCAGGGTTCTTCCCTGCGTAGTCAAAAATCCGGAGCCATACCACATGACATCTCTCTAAGCCGGAAAGGGGGAGA	140
AGCGGCCGCGACTCTAGAGGAGAAAACTCGACTAAGCGAGTATAAACGACATTAGGCTTAGAGCGTCCCGGCAGCTGCCGGGGGTTGTATAACTTCCGGAGCCATACCACATAGCCGAGTTCTAAGCCGGAAAGGGGGAGA	141
AGCGGCCGCGACTCTAGAGGAGAAAACTCGACTAAGCGAGTATAAACGACATTAGGCTTAGAGCGTCTTGGTCGGTATTACCGGCTGGGGGTTGTATAACTTCCGGAGCCATACCACATGCGTAAGTGCTAAGCCGGAAAGGGGGAGA	148
AGCGGCCGCGACTCTAGAGGAGAAAACTCGACTAAGCGAGTATAAACGACATTAGGCTTAGAGCGGCAGGGTTCTTCCCTGCGTTGTATAACTTCCGGAGCCATACCACATTGCTACGAGCTAAGCCGGAAAGGGGGAGA	140
AGCGGCCGCGACTCTAGAGGAGAAAACTCGACTAAGCGAGTATAAACGGTGTTAGGCTTAGAGCGTCCCGGCAGCTGCCGGGGGTCACATTAATTCCGGAGCCATACCACATTCACAGCCTCTAAGCCGGAAAGGGGGAGA	141
AGCGGCCGCGACTCTAGAGGAGAAAACTCGACTAAGCGAGTATAAACGGTGTTAGGCTTAGAGCGTCTTGGTCGGTATTACCGGCTGGGGGTCACATTAATTCCGGAGCCATACCACATTCGAAGCATCTAAGCCGGAAAGGGGGAGA	148
AGCGGCCGCGACTCTAGAGGAGAAAACTCGACTAAGCGAGTATAAACGGTGTTAGGCTTAGAGCGGCAGGGTTCTTCCCTGCGTCACATTAATTCCGGAGCCATACCACATATACTCGAGCTAAGCCGGAAAGGGGGAGA	140
AGCGGCCGCGACTCTAGAGGAGAAAACTCGACTAAGCGAGTATAAACGTTATTAGGCTTAGAGCGTCCCGGCAGCTGCCGGGGGTTAACTAATATCCGGAGCCATACCACATACCATTCCCCTAAGCCGGAAAGGGGGAGA	141
AGCGGCCGCGACTCTAGAGGAGAAAACTCGACTAAGCGAGTATAAACGTTATTAGGCTTAGAGCGTCTTGGTCGGTATTACCGGCTGGGGGTTAACTAATATCCGGAGCCATACCACATGTCATAGTGCTAAGCCGGAAAGGGGGAGA	148
AGCGGCCGCGACTCTAGAGGAGAAAACTCGACTAAGCGAGTATAAACGTTATTAGGCTTAGAGCGGCAGGGTTCTTCCCTGCGTTAACTAATATCCGGAGCCATACCACATAAGCTCGAACTAAGCCGGAAAGGGGGAGA	140
AGCGGCCGCGACTCTAGAGGAGAAAACTCGACTATGCGAGTATAAATAGTAATTAGGCATAGTGCGTCCCGGCAGCTGCCGGGGGTTTAGCAGTTTCCGGAGCCATACCACATTCATAGGCGCTAAGCCGGAAAGGGGGAGA	142
AGCGGCCGCGACTCTAGAGGAGAAAACTCGACTATGCGAGTATAAATAGTAATTAGGCATAGTGCGTCTTGGTCGGTATTACCGGCTGGGGGTTTAGCAGTTTCCGGAGCCATACCACATTATCCGAGACTAAGCCGGAAAGGGGGAGA	149
AGCGGCCGCGACTCTAGAGGAGAAAACTCGACTATGCGAGTATAAATAGTAATTAGGCATAGTGCGGCAGGGTTCTTCCCTGCGTTTAGCAGTTTCCGGAGCCATACCACATAACTATCCCCTAAGCCGGAAAGGGGGAGA	141
AGCGGCCGCGACTCTAGAGGAGAAAACTCGACTATGCGAGTATAAATAGGCTTTAGGCATAGTGCGTCCCGGCAGCTGCCGGGGGTAGTCAAAAATCCGGAGCCATACCACATTTTACGGCGCTAAGCCGGAAAGGGGGAGA	142
AGCGGCCGCGACTCTAGAGGAGAAAACTCGACTATGCGAGTATAAATAGGCTTTAGGCATAGTGCGTCTTGGTCGGTATTACCGGCTGGGGGTAGTCAAAAATCCGGAGCCATACCACATTGAAGCGTTCTAAGCCGGAAAGGGGGAGA	149
AGCGGCCGCGACTCTAGAGGAGAAAACTCGACTATGCGAGTATAAATAGGCTTTAGGCATAGTGCGGCAGGGTTCTTCCCTGCGTAGTCAAAAATCCGGAGCCATACCACATTAGGATCGGCTAAGCCGGAAAGGGGGAGA	141
AGCGGCCGCGACTCTAGAGGAGAAAACTCGACTATGCGAGTATAAATAGACATTAGGCATAGTGCGTCCCGGCAGCTGCCGGGGGTTGTATAACTTCCGGAGCCATACCACATTCCGAAGCTCTAAGCCGGAAAGGGGGAGA	142
AGCGGCCGCGACTCTAGAGGAGAAAACTCGACTATGCGAGTATAAATAGACATTAGGCATAGTGCGTCTTGGTCGGTATTACCGGCTGGGGGTTGTATAACTTCCGGAGCCATACCACATGACGTGGTTCTAAGCCGGAAAGGGGGAGA	149
AGCGGCCGCGACTCTAGAGGAGAAAACTCGACTATGCGAGTATAAATAGACATTAGGCATAGTGCGGCAGGGTTCTTCCCTGCGTTGTATAACTTCCGGAGCCATACCACATGCTTGAAGCCTAAGCCGGAAAGGGGGAGA	141
AGCGGCCGCGACTCTAGAGGAGAAAACTCGACTATGCGAGTATAAATAGGTGTTAGGCATAGTGCGTCCCGGCAGCTGCCGGGGGTCACATTAATTCCGGAGCCATACCACATACGTCTCATCTAAGCCGGAAAGGGGGAGA	142
AGCGGCCGCGACTCTAGAGGAGAAAACTCGACTATGCGAGTATAAATAGGTGTTAGGCATAGTGCGTCTTGGTCGGTATTACCGGCTGGGGGTCACATTAATTCCGGAGCCATACCACATCGCTCTTAGCTAAGCCGGAAAGGGGGAGA	149
AGCGGCCGCGACTCTAGAGGAGAAAACTCGACTATGCGAGTATAAATAGGTGTTAGGCATAGTGCGGCAGGGTTCTTCCCTGCGTCACATTAATTCCGGAGCCATACCACATAGCGTTGATCTAAGCCGGAAAGGGGGAGA	141
AGCGGCCGCGACTCTAGAGGAGAAAACTCGACTATGCGAGTATAAATAGTTATTAGGCATAGTGCGTCCCGGCAGCTGCCGGGGGTTAACTAATATCCGGAGCCATACCACATTGGACGATACTAAGCCGGAAAGGGGGAGA	142
AGCGGCCGCGACTCTAGAGGAGAAAACTCGACTATGCGAGTATAAATAGTTATTAGGCATAGTGCGTCTTGGTCGGTATTACCGGCTGGGGGTTAACTAATATCCGGAGCCATACCACATAGTCAAGCGCTAAGCCGGAAAGGGGGAGA	149
AGCGGCCGCGACTCTAGAGGAGAAAACTCGACTATGCGAGTATAAATAGTTATTAGGCATAGTGCGGCAGGGTTCTTCCCTGCGTTAACTAATATCCGGAGCCATACCACATATGCACCGACTAAGCCGGAAAGGGGGAGA	141
AGCGGCCGCGACTCTAGAGGAGAAAACTCGACTATGCGAGTATAAATAGGTAATTAGGCATAGTGCGTCCCGGCAGCTGCCGGGGGTTTAGCAGTTTCCGGAGCCATACCACATTTAGCCACCCTAAGCCGGAAAGGGGGAGA	143
AGCGGCCGCGACTCTAGAGGAGAAAACTCGACTATGCGAGTATAAATAGGTAATTAGGCATAGTGCGTCTTGGTCGGTATTACCGGCTGGGGGTTTAGCAGTTTCCGGAGCCATACCACATAGCATAAGGCTAAGCCGGAAAGGGGGAGA	150
AGCGGCCGCGACTCTAGAGGAGAAAACTCGACTATGCGAGTATAAATAGGTAATTAGGCATAGTGCGGCAGGGTTCTTCCCTGCGTTTAGCAGTTTCCGGAGCCATACCACATTCGGCTTACCTAAGCCGGAAAGGGGGAGA	142
AGCGGCCGCGACTCTAGAGGAGAAAACTCGACTATGCGAGTATAAATAGGGCTTTAGGCATAGTGCGTCCCGGCAGCTGCCGGGGGTAGTCAAAAATCCGGAGCCATACCACATAGACAGGGTCTAAGCCGGAAAGGGGGAGA	143
AGCGGCCGCGACTCTAGAGGAGAAAACTCGACTATGCGAGTATAAATAGGGCTTTAGGCATAGTGCGTCTTGGTCGGTATTACCGGCTGGGGGTAGTCAAAAATCCGGAGCCATACCACATACGACTTCCCTAAGCCGGAAAGGGGGAGA	150
AGCGGCCGCGACTCTAGAGGAGAAAACTCGACTATGCGAGTATAAATAGGGCTTTAGGCATAGTGCGGCAGGGTTCTTCCCTGCGTAGTCAAAAATCCGGAGCCATACCACATACACATTCGCTAAGCCGGAAAGGGGGAGA	142
AGCGGCCGCGACTCTAGAGGAGAAAACTCGACTATGCGAGTATAAATAGGACATTAGGCATAGTGCGTCCCGGCAGCTGCCGGGGGTTGTATAACTTCCGGAGCCATACCACATCGCCAATAACTAAGCCGGAAAGGGGGAGA	143
AGCGGCCGCGACTCTAGAGGAGAAAACTCGACTATGCGAGTATAAATAGGACATTAGGCATAGTGCGTCTTGGTCGGTATTACCGGCTGGGGGTTGTATAACTTCCGGAGCCATACCACATGGTTTCCTCCTAAGCCGGAAAGGGGGAGA	150
AGCGGCCGCGACTCTAGAGGAGAAAACTCGACTATGCGAGTATAAATAGGACATTAGGCATAGTGCGGCAGGGTTCTTCCCTGCGTTGTATAACTTCCGGAGCCATACCACATTCCCCATTGCTAAGCCGGAAAGGGGGAGA	142
AGCGGCCGCGACTCTAGAGGAGAAAACTCGACTATGCGAGTATAAATAGGGTGTTAGGCATAGTGCGTCCCGGCAGCTGCCGGGGGTCACATTAATTCCGGAGCCATACCACATCACTTGTGTCTAAGCCGGAAAGGGGGAGA	143
AGCGGCCGCGACTCTAGAGGAGAAAACTCGACTATGCGAGTATAAATAGGGTGTTAGGCATAGTGCGTCTTGGTCGGTATTACCGGCTGGGGGTCACATTAATTCCGGAGCCATACCACATCAAGAGCAACTAAGCCGGAAAGGGGGAGA	150
AGCGGCCGCGACTCTAGAGGAGAAAACTCGACTATGCGAGTATAAATAGGGTGTTAGGCATAGTGCGGCAGGGTTCTTCCCTGCGTCACATTAATTCCGGAGCCATACCACATACCCTCATTCTAAGCCGGAAAGGGGGAGA	142
AGCGGCCGCGACTCTAGAGGAGAAAACTCGACTATGCGAGTATAAATAGGTTATTAGGCATAGTGCGTCCCGGCAGCTGCCGGGGGTTAACTAATATCCGGAGCCATACCACATCGCTAAATCCTAAGCCGGAAAGGGGGAGA	143
AGCGGCCGCGACTCTAGAGGAGAAAACTCGACTATGCGAGTATAAATAGGTTATTAGGCATAGTGCGTCTTGGTCGGTATTACCGGCTGGGGGTTAACTAATATCCGGAGCCATACCACATCTGACCTATCTAAGCCGGAAAGGGGGAGA	150
AGCGGCCGCGACTCTAGAGGAGAAAACTCGACTATGCGAGTATAAATAGGTTATTAGGCATAGTGCGGCAGGGTTCTTCCCTGCGTTAACTAATATCCGGAGCCATACCACATGCACTGATACTAAGCCGGAAAGGGGGAGA	142
AGCGGCCGCGACTCTAGAGGAGAAAACTCGACTATGCGAGTGTAAATAGTAATTAGGCATAGTGCGTCCCGGCAGCTGCCGGGGGTTTAGCAGTTTCCGGAGCCATACCACATGGATGCACTCTAAGCCGGAAAGGGGGAGA	142
AGCGGCCGCGACTCTAGAGGAGAAAACTCGACTATGCGAGTGTAAATAGTAATTAGGCATAGTGCGTCTTGGTCGGTATTACCGGCTGGGGGTTTAGCAGTTTCCGGAGCCATACCACATAAGATTGCCCTAAGCCGGAAAGGGGGAGA	149
AGCGGCCGCGACTCTAGAGGAGAAAACTCGACTATGCGAGTGTAAATAGTAATTAGGCATAGTGCGGCAGGGTTCTTCCCTGCGTTTAGCAGTTTCCGGAGCCATACCACATATGAGTTCGCTAAGCCGGAAAGGGGGAGA	141
AGCGGCCGCGACTCTAGAGGAGAAAACTCGACTATGCGAGTGTAAATAGGCTTTAGGCATAGTGCGTCCCGGCAGCTGCCGGGGGTAGTCAAAAATCCGGAGCCATACCACATGTTCAGAGGCTAAGCCGGAAAGGGGGAGA	142
AGCGGCCGCGACTCTAGAGGAGAAAACTCGACTATGCGAGTGTAAATAGGCTTTAGGCATAGTGCGTCTTGGTCGGTATTACCGGCTGGGGGTAGTCAAAAATCCGGAGCCATACCACATTTGGCACTACTAAGCCGGAAAGGGGGAGA	149
AGCGGCCGCGACTCTAGAGGAGAAAACTCGACTATGCGAGTGTAAATAGGCTTTAGGCATAGTGCGGCAGGGTTCTTCCCTGCGTAGTCAAAAATCCGGAGCCATACCACATGGTCTGCTACTAAGCCGGAAAGGGGGAGA	141
AGCGGCCGCGACTCTAGAGGAGAAAACTCGACTATGCGAGTGTAAATAGACATTAGGCATAGTGCGTCCCGGCAGCTGCCGGGGGTTGTATAACTTCCGGAGCCATACCACATCATACCAGACTAAGCCGGAAAGGGGGAGA	142
AGCGGCCGCGACTCTAGAGGAGAAAACTCGACTATGCGAGTGTAAATAGACATTAGGCATAGTGCGTCTTGGTCGGTATTACCGGCTGGGGGTTGTATAACTTCCGGAGCCATACCACATTTTAGGCGCCTAAGCCGGAAAGGGGGAGA	149
AGCGGCCGCGACTCTAGAGGAGAAAACTCGACTATGCGAGTGTAAATAGACATTAGGCATAGTGCGGCAGGGTTCTTCCCTGCGTTGTATAACTTCCGGAGCCATACCACATCAATGAACGCTAAGCCGGAAAGGGGGAGA	141
AGCGGCCGCGACTCTAGAGGAGAAAACTCGACTATGCGAGTGTAAATAGGTGTTAGGCATAGTGCGTCCCGGCAGCTGCCGGGGGTCACATTAATTCCGGAGCCATACCACATCTGACCACTCTAAGCCGGAAAGGGGGAGA	142
AGCGGCCGCGACTCTAGAGGAGAAAACTCGACTATGCGAGTGTAAATAGGTGTTAGGCATAGTGCGTCTTGGTCGGTATTACCGGCTGGGGGTCACATTAATTCCGGAGCCATACCACATGGACACTAACTAAGCCGGAAAGGGGGAGA	149
AGCGGCCGCGACTCTAGAGGAGAAAACTCGACTATGCGAGTGTAAATAGGTGTTAGGCATAGTGCGGCAGGGTTCTTCCCTGCGTCACATTAATTCCGGAGCCATACCACATTTGCTATCCCTAAGCCGGAAAGGGGGAGA	141
AGCGGCCGCGACTCTAGAGGAGAAAACTCGACTATGCGAGTGTAAATAGTTATTAGGCATAGTGCGTCCCGGCAGCTGCCGGGGGTTAACTAATATCCGGAGCCATACCACATGAGGTTTTGCTAAGCCGGAAAGGGGGAGA	142
AGCGGCCGCGACTCTAGAGGAGAAAACTCGACTATGCGAGTGTAAATAGTTATTAGGCATAGTGCGTCTTGGTCGGTATTACCGGCTGGGGGTTAACTAATATCCGGAGCCATACCACATCTCGTTAGGCTAAGCCGGAAAGGGGGAGA	149
AGCGGCCGCGACTCTAGAGGAGAAAACTCGACTATGCGAGTGTAAATAGTTATTAGGCATAGTGCGGCAGGGTTCTTCCCTGCGTTAACTAATATCCGGAGCCATACCACATTGGCTTCATCTAAGCCGGAAAGGGGGAGA	141
AGCGGCCGCGACTCTAGAGGAGAAAACTCGACTATGCGAGTTTAAATAGTAATTAGGCATAGTGCGTCCCGGCAGCTGCCGGGGGTTTAGCAGTTTCCGGAGCCATACCACATCACCGTATGCTAAGCCGGAAAGGGGGAGA	142
AGCGGCCGCGACTCTAGAGGAGAAAACTCGACTATGCGAGTTTAAATAGTAATTAGGCATAGTGCGTCTTGGTCGGTATTACCGGCTGGGGGTTTAGCAGTTTCCGGAGCCATACCACATTGCAATGAGCTAAGCCGGAAAGGGGGAGA	149
AGCGGCCGCGACTCTAGAGGAGAAAACTCGACTATGCGAGTTTAAATAGTAATTAGGCATAGTGCGGCAGGGTTCTTCCCTGCGTTTAGCAGTTTCCGGAGCCATACCACATACAGAGTACCTAAGCCGGAAAGGGGGAGA	141
AGCGGCCGCGACTCTAGAGGAGAAAACTCGACTATGCGAGTTTAAATAGGCTTTAGGCATAGTGCGTCCCGGCAGCTGCCGGGGGTAGTCAAAAATCCGGAGCCATACCACATCCTCAATTCCTAAGCCGGAAAGGGGGAGA	142
AGCGGCCGCGACTCTAGAGGAGAAAACTCGACTATGCGAGTTTAAATAGGCTTTAGGCATAGTGCGTCTTGGTCGGTATTACCGGCTGGGGGTAGTCAAAAATCCGGAGCCATACCACATTCGATCCTTCTAAGCCGGAAAGGGGGAGA	149
AGCGGCCGCGACTCTAGAGGAGAAAACTCGACTATGCGAGTTTAAATAGGCTTTAGGCATAGTGCGGCAGGGTTCTTCCCTGCGTAGTCAAAAATCCGGAGCCATACCACATAACCATCCGCTAAGCCGGAAAGGGGGAGA	141
AGCGGCCGCGACTCTAGAGGAGAAAACTCGACTATGCGAGTTTAAATAGACATTAGGCATAGTGCGTCCCGGCAGCTGCCGGGGGTTGTATAACTTCCGGAGCCATACCACATTCAGGTAGTCTAAGCCGGAAAGGGGGAGA	142
AGCGGCCGCGACTCTAGAGGAGAAAACTCGACTATGCGAGTTTAAATAGACATTAGGCATAGTGCGTCTTGGTCGGTATTACCGGCTGGGGGTTGTATAACTTCCGGAGCCATACCACATTGACTGAGTCTAAGCCGGAAAGGGGGAGA	149
AGCGGCCGCGACTCTAGAGGAGAAAACTCGACTATGCGAGTTTAAATAGACATTAGGCATAGTGCGGCAGGGTTCTTCCCTGCGTTGTATAACTTCCGGAGCCATACCACATCATCACATCCTAAGCCGGAAAGGGGGAGA	141
AGCGGCCGCGACTCTAGAGGAGAAAACTCGACTATGCGAGTTTAAATAGGTGTTAGGCATAGTGCGTCCCGGCAGCTGCCGGGGGTCACATTAATTCCGGAGCCATACCACATTCACGATGACTAAGCCGGAAAGGGGGAGA	142
AGCGGCCGCGACTCTAGAGGAGAAAACTCGACTATGCGAGTTTAAATAGGTGTTAGGCATAGTGCGTCTTGGTCGGTATTACCGGCTGGGGGTCACATTAATTCCGGAGCCATACCACATCAATTGCCCCTAAGCCGGAAAGGGGGAGA	149
AGCGGCCGCGACTCTAGAGGAGAAAACTCGACTATGCGAGTTTAAATAGGTGTTAGGCATAGTGCGGCAGGGTTCTTCCCTGCGTCACATTAATTCCGGAGCCATACCACATAACCCAGTGCTAAGCCGGAAAGGGGGAGA	141
AGCGGCCGCGACTCTAGAGGAGAAAACTCGACTATGCGAGTTTAAATAGTTATTAGGCATAGTGCGTCCCGGCAGCTGCCGGGGGTTAACTAATATCCGGAGCCATACCACATATGTGAACGCTAAGCCGGAAAGGGGGAGA	142
AGCGGCCGCGACTCTAGAGGAGAAAACTCGACTATGCGAGTTTAAATAGTTATTAGGCATAGTGCGTCTTGGTCGGTATTACCGGCTGGGGGTTAACTAATATCCGGAGCCATACCACATGTTCTGTCCCTAAGCCGGAAAGGGGGAGA	149
AGCGGCCGCGACTCTAGAGGAGAAAACTCGACTATGCGAGTTTAAATAGTTATTAGGCATAGTGCGGCAGGGTTCTTCCCTGCGTTAACTAATATCCGGAGCCATACCACATTTTGTTGCCCTAAGCCGGAAAGGGGGAGA	141
AGCGGCCGCGACTCTAGAGGAGAAAACTCGACTATGCGAGTATAAACGTAATTAGGCATAGTGCGTCCCGGCAGCTGCCGGGGGTTTAGCAGTTTCCGGAGCCATACCACATAACCGTTCTCTAAGCCGGAAAGGGGGAGA	141
AGCGGCCGCGACTCTAGAGGAGAAAACTCGACTATGCGAGTATAAACGTAATTAGGCATAGTGCGTCTTGGTCGGTATTACCGGCTGGGGGTTTAGCAGTTTCCGGAGCCATACCACATAGGTGACACCTAAGCCGGAAAGGGGGAGA	148
AGCGGCCGCGACTCTAGAGGAGAAAACTCGACTATGCGAGTATAAACGTAATTAGGCATAGTGCGGCAGGGTTCTTCCCTGCGTTTAGCAGTTTCCGGAGCCATACCACATCGTTTGCTCCTAAGCCGGAAAGGGGGAGA	140
AGCGGCCGCGACTCTAGAGGAGAAAACTCGACTATGCGAGTATAAACGGCTTTAGGCATAGTGCGTCCCGGCAGCTGCCGGGGGTAGTCAAAAATCCGGAGCCATACCACATTTCAGAGGTCTAAGCCGGAAAGGGGGAGA	141
AGCGGCCGCGACTCTAGAGGAGAAAACTCGACTATGCGAGTATAAACGGCTTTAGGCATAGTGCGTCTTGGTCGGTATTACCGGCTGGGGGTAGTCAAAAATCCGGAGCCATACCACATGTCCACATACTAAGCCGGAAAGGGGGAGA	148
AGCGGCCGCGACTCTAGAGGAGAAAACTCGACTATGCGAGTATAAACGGCTTTAGGCATAGTGCGGCAGGGTTCTTCCCTGCGTAGTCAAAAATCCGGAGCCATACCACATTAGGAGTGACTAAGCCGGAAAGGGGGAGA	140
AGCGGCCGCGACTCTAGAGGAGAAAACTCGACTATGCGAGTATAAACGACATTAGGCATAGTGCGTCCCGGCAGCTGCCGGGGGTTGTATAACTTCCGGAGCCATACCACATCCTTGATTCCTAAGCCGGAAAGGGGGAGA	141
AGCGGCCGCGACTCTAGAGGAGAAAACTCGACTATGCGAGTATAAACGACATTAGGCATAGTGCGTCTTGGTCGGTATTACCGGCTGGGGGTTGTATAACTTCCGGAGCCATACCACATCTGAACTCCCTAAGCCGGAAAGGGGGAGA	148
AGCGGCCGCGACTCTAGAGGAGAAAACTCGACTATGCGAGTATAAACGACATTAGGCATAGTGCGGCAGGGTTCTTCCCTGCGTTGTATAACTTCCGGAGCCATACCACATAGGTGGGAACTAAGCCGGAAAGGGGGAGA	140
AGCGGCCGCGACTCTAGAGGAGAAAACTCGACTATGCGAGTATAAACGGTGTTAGGCATAGTGCGTCCCGGCAGCTGCCGGGGGTCACATTAATTCCGGAGCCATACCACATGTGGAAGCACTAAGCCGGAAAGGGGGAGA	141
AGCGGCCGCGACTCTAGAGGAGAAAACTCGACTATGCGAGTATAAACGGTGTTAGGCATAGTGCGTCTTGGTCGGTATTACCGGCTGGGGGTCACATTAATTCCGGAGCCATACCACATAGGACTTGCCTAAGCCGGAAAGGGGGAGA	148
AGCGGCCGCGACTCTAGAGGAGAAAACTCGACTATGCGAGTATAAACGGTGTTAGGCATAGTGCGGCAGGGTTCTTCCCTGCGTCACATTAATTCCGGAGCCATACCACATGATCCATTGCTAAGCCGGAAAGGGGGAGA	140
AGCGGCCGCGACTCTAGAGGAGAAAACTCGACTATGCGAGTATAAACGTTATTAGGCATAGTGCGTCCCGGCAGCTGCCGGGGGTTAACTAATATCCGGAGCCATACCACATGTCTGCATGCTAAGCCGGAAAGGGGGAGA	141
AGCGGCCGCGACTCTAGAGGAGAAAACTCGACTATGCGAGTATAAACGTTATTAGGCATAGTGCGTCTTGGTCGGTATTACCGGCTGGGGGTTAACTAATATCCGGAGCCATACCACATAAACGAGAGCTAAGCCGGAAAGGGGGAGA	148
AGCGGCCGCGACTCTAGAGGAGAAAACTCGACTATGCGAGTATAAACGTTATTAGGCATAGTGCGGCAGGGTTCTTCCCTGCGTTAACTAATATCCGGAGCCATACCACATAGGTGCTCACTAAGCCGGAAAGGGGGAGA	140
AGCGGCCGCGACTCTAGAGGAGAAAACTCGTTAGGGCGAGTATAAATAGTAATTAAGCCCTAAGCGTCCCGGCAGCTGCCGGGGGTTTAGCAGTTTCCGGAGCCATACCACATAGCCAGACACTAAGCCGGAAAGGGGGAGA	142
AGCGGCCGCGACTCTAGAGGAGAAAACTCGTTAGGGCGAGTATAAATAGTAATTAAGCCCTAAGCGTCTTGGTCGGTATTACCGGCTGGGGGTTTAGCAGTTTCCGGAGCCATACCACATAGCCCATGTCTAAGCCGGAAAGGGGGAGA	149
[truncated: 11,251 more rows]

## Sheet: Deep Seq Results
	Barcode1	Barcode2	Barcode3	Barcode4	clv(bc1)	unc(bc1)	clv(bc2)	unc(bc2)	clv(bc3)	unc(bc3)	clv(bc4)	unc(bc4)	FC(bc1)	FC(bc2)	FC(bc3)	FC(bc4)	FC(all)	Total reads		Raw sequence (core ribozyme)	5'native	3'native	length
[truncated: 3,001 more rows]
